# Supplementary material for: Prospective Identification of Malaria Parasite Genes under Balancing Selection
Source: PubMed Central journal article supplement (PMC2679211; doi:10.1371/journal.pone.0005568), 2009-05-15
Supplement: pone.0005568.s001.pdf [file pone.0005568.s001.pdf]

Supplementary Figure 1

PPF0615c

|                     | 10         | 20         | 30         | 40         | 50         | 60         | 70         | 80         |
|---------------------|------------|------------|------------|------------|------------|------------|------------|------------|
| PPF0615c            | ATGATAAAAT | TAAGTAAGAA | GTATTGTTTA | GGGATATCCT | TTGTATTATA | TATTTTGTTG | TCTGTTTGTG | AAGGGCATAA |
| 3D7                 | .....      | .....      | .....      | .....      | .....      | .....      | .....      | .....      |
| RO33                | .....      | .....      | .....      | .....      | .....      | .....      | .....      | .....      |
| Palo Alto           | .....      | .....      | .....      | .....      | .....      | .....      | .....      | .....      |
| FCR3                | .....      | .....      | .....      | .....      | .....      | .....      | .....      | .....      |
| Wellcome            | .....      | .....      | .....      | .....      | .....      | .....      | .....      | .....      |
| D6                  | .....      | .....      | .....      | .....      | .....      | .....      | .....      | .....      |
| T996                | .....      | .....      | .....      | .....      | .....      | .....      | .....      | .....      |
| T9102               | .....      | .....      | .....      | .....      | .....      | .....      | .....      | .....      |
| K1                  | .....      | .....      | .....      | .....      | .....      | .....      | .....      | .....      |
| Dd2                 | .....      | .....      | .....      | .....      | .....      | .....      | .....      | .....      |
| D10                 | .....      | .....      | .....      | .....      | .....      | .....      | .....      | .....      |
| FCC2                | .....      | .....      | .....      | .....      | .....      | .....      | .....      | .....      |
| HB3                 | .....      | .....      | .....      | .....      | .....      | .....      | .....      | .....      |
| 7G8                 | .....      | .....      | .....      | .....      | .....      | .....      | .....      | .....      |
| <i>P.reichenowi</i> | .....      | .G.....    | .....      | .....      | .....      | .....      | .....      | TT.....    |

  

|                     | 90         | 100        | 110        | 120        | 130        | 140        | 150       | 160        |
|---------------------|------------|------------|------------|------------|------------|------------|-----------|------------|
| PPF0615c            | AAATTTAACA | TGTGACTTTA | ACGATGTATA | CAAATTAGAA | TTTCATCCTA | ATCAACAAAC | AAGTGTACT | AAATTATGTA |
| 3D7                 | .....      | .....      | .....      | .....      | .....      | .....      | .....     | .....      |
| RO33                | .....      | .....      | .....      | .....      | .....      | .....      | .....     | .....      |
| Palo Alto           | .....      | .....      | .....      | .....      | .....      | .....      | .....     | .....      |
| FCR3                | .....      | .....      | .....      | .....      | .....      | .....      | .....     | .....      |
| Wellcome            | .....      | .....      | .....      | .....      | .....      | .....      | .....     | .....      |
| D6                  | .....      | .....      | .....      | .....      | .....      | .....      | .....     | .....      |
| T996                | .....      | .....      | .....      | .....      | .....      | .....      | .....     | .....      |
| T9102               | .....      | .....      | .....      | .....      | .....      | .....      | .....     | .....      |
| K1                  | .....      | .....      | .....      | .....      | .....      | .....      | .....     | .....      |
| Dd2                 | .....      | .....      | .....      | .....      | .....      | .....      | .....     | .....      |
| D10                 | .....      | .....      | .....      | .....      | .....      | .....      | .....     | .....      |
| FCC2                | .....      | .....      | .....      | .....      | .....      | .....      | .....     | .....      |
| HB3                 | .....      | .....      | .....      | .....      | .....      | .....      | .....     | .....      |
| 7G8                 | .....      | .....      | .....      | .....      | .....      | .....      | .....     | .....      |
| <i>P.reichenowi</i> | .G.....    | .....      | .....      | T.....     | .....      | .C.....    | .....     | .A.....    |

  

|                     | 170        | 180        | 190        | 200        | 210        | 220        | 230        | 240       |
|---------------------|------------|------------|------------|------------|------------|------------|------------|-----------|
| PPF0615c            | ATTTAACTCC | TAATGTATTA | GAAAAGGTAA | CTATAAAATG | TGGTTCAGAT | AAATTAATTT | ATAATTTATA | TCCTCCAAC |
| 3D7                 | .....      | .....      | .....      | .....      | .....      | .....      | .....      | .....     |
| RO33                | .....      | .....      | .....      | .....      | .....      | .....      | .....      | .....     |
| Palo Alto           | .....      | .....      | .....      | .....      | .....      | .....      | .....      | .....     |
| FCR3                | .G.....    | .....      | .....      | .....      | .....      | .....      | .....      | .....     |
| Wellcome            | .G.....    | .....      | .....      | .....      | .....      | .....      | .....      | .....     |
| D6                  | .....      | .....      | .....      | .....      | .....      | .....      | .....      | .....     |
| T996                | .....      | .....      | .....      | .....      | .....      | .....      | .....      | .....     |
| T9102               | .G.....    | .....      | .....      | .....      | .....      | .....      | .....      | .....     |
| K1                  | .....      | .....      | .....      | .....      | .....      | .....      | .....      | .....     |
| Dd2                 | .....      | .....      | .....      | .....      | .....      | .....      | .....      | .....     |
| D10                 | .....      | .....      | .....      | .....      | .....      | .....      | .....      | .....     |
| FCC2                | .....      | .....      | .....      | .....      | .....      | .....      | .....      | .....     |
| HB3                 | .....      | .....      | .....      | .....      | .....      | .....      | .....      | .....     |
| 7G8                 | .....      | .....      | .....      | .....      | .....      | .....      | .....      | .....     |
| <i>P.reichenowi</i> | .....      | .....      | .A.....    | .A.....    | .....      | .....      | .....      | .....     |

  

|                     | 250        | 260        | 270        | 280        | 290        | 300        | 310        | 320        |
|---------------------|------------|------------|------------|------------|------------|------------|------------|------------|
| PPF0615c            | TGTTTTGAAG | AGGTATATGC | ATCTAGGAAT | ATGATGCATT | TAAAAAAAAT | AAAAGAGTTT | GTAATCGGAT | CATCAATGTT |
| 3D7                 | .....      | .....      | .....      | .....      | .....      | .....      | .....      | .....      |
| RO33                | .....      | .....      | .....      | .....      | .....      | .....      | .....      | .....      |
| Palo Alto           | .....      | .....      | .....      | .....      | .....      | .....      | .....      | .....      |
| FCR3                | .....      | .....      | .....      | .....      | .....      | .....      | .....      | .....      |
| Wellcome            | .....      | .....      | .....      | .....      | .....      | .....      | .....      | .....      |
| D6                  | .....      | .....      | .....      | .....      | .....      | .....      | .....      | .....      |
| T996                | .....      | .....      | .....      | .....      | .....      | .....      | .....      | .....      |
| T9102               | .....      | .....      | .....      | .....      | .....      | .....      | .....      | .....      |
| K1                  | .....      | .....      | .....      | .....      | .....      | .....      | .....      | .....      |
| Dd2                 | .....      | .....      | .....      | .....      | .....      | .....      | .....      | .....      |
| D10                 | .....      | .....      | .....      | .....      | .....      | .....      | .....      | .....      |
| FCC2                | .....      | .....      | .....      | .....      | .....      | .....      | .....      | .....      |
| HB3                 | .....      | .....      | .....      | .....      | .....      | .....      | .....      | .....      |
| 7G8                 | .....      | .....      | .....      | .....      | .....      | .....      | .....      | .....      |
| <i>P.reichenowi</i> | .....      | .A.        | TCT.....   | .....      | .....      | .T.....    | .....      | .....      |

|                     | 330        | 340        | 350        | 360        | 370        | 380        | 390                  | 400        |
|---------------------|------------|------------|------------|------------|------------|------------|----------------------|------------|
| PF0615c             | TATGAGACGT | AGTTTAACAC | CAAAATAAAT | TAACGAAGTT | TCTTTCAGAA | TTCCACCTAA | TATGATGCCT           | GAAAAACCTA |
| 3D7                 | .....      | .....      | .....      | .....      | .....      | .....      | .....                | .....      |
| RO33                | .....      | .....      | .....      | .....      | .....      | .....      | .....                | .....      |
| Palo_Alto           | .....      | .....      | .....      | .....      | .....      | .....      | .....                | .....      |
| FCR3                | .....      | .....      | .....      | .....      | .....      | .....      | .....                | .....      |
| Wellcome            | .....      | .....      | .....      | .....      | .....      | .....      | .....                | .....      |
| D6                  | .....      | .....      | .....      | .....      | .....      | .....      | .....                | .....      |
| T996                | .....      | .....      | .....      | .....      | .....      | .....      | .....                | .....      |
| T9102               | .....      | .....      | .....      | .....      | .....      | .....      | .....                | .....      |
| K1                  | .....      | .....      | .....      | .....      | .....      | .....      | .....                | .....      |
| Dd2                 | .....      | .....      | .....      | .....      | .....      | .....      | .....                | .....      |
| D10                 | .....      | .....      | .....      | .....      | .....      | .....      | .....                | .....      |
| FCC2                | .....      | .....      | .....      | .....      | .....      | .....      | .....                | .....      |
| HB3                 | .....      | .....      | .....      | .....      | .....      | .....      | .....                | .....      |
| 7G8                 | .....      | .....      | .....      | .....      | .....      | .....      | .....                | .....      |
| <i>P.reichenowi</i> | .....      | .....      | .....      | .....      | .....      | .....      | ..... <b>T</b> ..... | .....      |

|                     | 410        | 420       | 430        | 440       | 450                  | 460                  | 470                   | 480                     |
|---------------------|------------|-----------|------------|-----------|----------------------|----------------------|-----------------------|-------------------------|
| PF0615c             | TATATTGTTT | TTGTGAAAT | AAAAAAACAA | TAACTATAA | TGGTCCAAT            | GGAAATCCTT           | CAAGTAAAA             | AGATATAATA              |
| 3D7                 | .....      | .....     | .....      | .....     | .....                | .....                | .....                 | .....                   |
| RO33                | .....      | .....     | .....      | .....     | .....                | .....                | .....                 | .....                   |
| Palo_Alto           | .....      | .....     | .....      | .....     | .....                | .....                | .....                 | .....                   |
| FCR3                | .....      | .....     | .....      | .....     | .....                | .....                | .....                 | .....                   |
| Wellcome            | .....      | .....     | .....      | .....     | .....                | .....                | .....                 | .....                   |
| D6                  | .....      | .....     | .....      | .....     | .....                | .....                | .....                 | .....                   |
| T996                | .....      | .....     | .....      | .....     | .....                | .....                | .....                 | .....                   |
| T9102               | .....      | .....     | .....      | .....     | .....                | .....                | .....                 | .....                   |
| K1                  | .....      | .....     | .....      | .....     | .....                | .....                | .....                 | .....                   |
| Dd2                 | .....      | .....     | .....      | .....     | .....                | .....                | .....                 | .....                   |
| D10                 | .....      | .....     | .....      | .....     | .....                | .....                | .....                 | .....                   |
| FCC2                | .....      | .....     | .....      | .....     | .....                | .....                | .....                 | .....                   |
| HB3                 | .....      | .....     | .....      | .....     | .....                | .....                | .....                 | .....                   |
| 7G8                 | .....      | .....     | .....      | .....     | .....                | .....                | .....                 | .....                   |
| <i>P.reichenowi</i> | .....      | .....     | .....      | .....     | ..... <b>A</b> ..... | ..... <b>T</b> ..... | ..... <b>CC</b> ..... | ..... <b>G..A</b> ..... |

|                     | 490        | 500        | 510        | 520        | 530        | 540        | 550        | 560        |
|---------------------|------------|------------|------------|------------|------------|------------|------------|------------|
| PF0615c             | AATAGAGGAA | TAGTTGAAAT | TATTATACCT | TCATTAAATG | AAAAAGTTAA | AGGATGTGAT | TTTACAACAA | GCGAATCTAC |
| 3D7                 | .....      | .....      | .....      | .....      | .....      | .....      | .....      | .....      |
| RO33                | .....      | .....      | .....      | .....      | .....      | .....      | .....      | .....      |
| Palo_Alto           | .....      | .....      | .....      | .....      | .....      | .....      | .....      | .....      |
| FCR3                | .....      | .....      | .....      | .....      | .....      | .....      | .....      | .....      |
| Wellcome            | .....      | .....      | .....      | .....      | .....      | .....      | .....      | .....      |
| D6                  | .....      | .....      | .....      | .....      | .....      | .....      | .....      | .....      |
| T996                | .....      | .....      | .....      | .....      | .....      | .....      | .....      | .....      |
| T9102               | .....      | .....      | .....      | .....      | .....      | .....      | .....      | .....      |
| K1                  | .....      | .....      | .....      | .....      | .....      | .....      | .....      | .....      |
| Dd2                 | .....      | .....      | .....      | .....      | .....      | .....      | .....      | .....      |
| D10                 | .....      | .....      | .....      | .....      | .....      | .....      | .....      | .....      |
| FCC2                | .....      | .....      | .....      | .....      | .....      | .....      | .....      | .....      |
| HB3                 | .....      | .....      | .....      | .....      | .....      | .....      | .....      | .....      |
| 7G8                 | .....      | .....      | .....      | .....      | .....      | .....      | .....      | .....      |
| <i>P.reichenowi</i> | .....      | .....      | .....      | .....      | .....      | .....      | .....      | .....      |

|                     | 570            | 580                  | 590            | 600                  | 610        | 620        | 630        | 640                  |
|---------------------|----------------|----------------------|----------------|----------------------|------------|------------|------------|----------------------|
| PF0615c             | AATTTTCTCA     | AAAGGATATA           | GTATTAATGA     | AAATCTAAT            | AAATCATCAA | ATAACCAACA | AGATATTGTA | TGTACAGTTA           |
| 3D7                 | .....          | .....                | .....          | .....                | .....      | .....      | .....      | .....                |
| RO33                | .....          | .....                | .....          | .....                | .....      | .....      | .....      | .....                |
| Palo_Alto           | .....          | .....                | .....          | .....                | .....      | .....      | .....      | .....                |
| FCR3                | .....          | .....                | .....          | .....                | .....      | .....      | .....      | .....                |
| Wellcome            | .....          | .....                | .....          | .....                | .....      | .....      | .....      | .....                |
| D6                  | .....          | .....                | .....          | .....                | .....      | .....      | .....      | .....                |
| T996                | .....          | .....                | .....          | .....                | .....      | .....      | .....      | .....                |
| T9102               | .....          | .....                | .....          | .....                | .....      | .....      | .....      | .....                |
| K1                  | .....          | .....                | .....          | .....                | .....      | .....      | .....      | .....                |
| Dd2                 | .....          | .....                | .....          | .....                | .....      | .....      | .....      | .....                |
| D10                 | .....          | .....                | .....          | .....                | .....      | .....      | .....      | .....                |
| FCC2                | .....          | .....                | .....          | .....                | .....      | .....      | .....      | .....                |
| HB3                 | .....          | .....                | .....          | .....                | .....      | .....      | .....      | .....                |
| 7G8                 | .....          | .....                | .....          | .....                | .....      | .....      | .....      | .....                |
| <i>P.reichenowi</i> | <b>C</b> ..... | ..... <b>C</b> ..... | <b>A</b> ..... | ..... <b>T</b> ..... | .....      | .....      | .....      | ..... <b>G</b> ..... |

|                     |             |            |            |             |            |            |            |            |
|---------------------|-------------|------------|------------|-------------|------------|------------|------------|------------|
|                     | 650         | 660        | 670        | 680         | 690        | 700        | 710        | 720        |
| PF0615c             | AGGCACATGC  | TAATGATTTA | AFCGGATTTA | AATGTCCAAG  | CAATTATTCT | GTTGAACCAC | ATGATTGTTT | TGTTAGTGCA |
| 3D7                 | .....       | .....      | .....      | .....       | .....      | .....      | .....      | .....      |
| RO33                | .....       | .....      | .....      | .....       | .....      | .....      | .....      | .....      |
| Palo_Alto           | .....       | .....      | .....      | .....       | .....      | .....      | .....      | .....      |
| FCR3                | .....       | .....      | .....      | .....       | .....      | .....      | .....      | .....      |
| Wellcome            | .....       | .....      | .....      | .....       | .....      | .....      | .....      | .....      |
| D6                  | .....       | .....      | .....      | .....       | .....      | .....      | .....      | .....      |
| T996                | .....       | .....      | .....      | .....       | .....      | .....      | .....      | .....      |
| T9102               | .....       | .....      | .....      | .....       | .....      | .....      | .....      | .....      |
| K1                  | .....       | .....      | .....      | .....       | .....      | .....      | .....      | .....      |
| Dd2                 | .....       | .....      | .....      | .....       | .....      | .....      | .....      | .....      |
| D10                 | .....       | .....      | .....      | .....       | .....      | .....      | .....      | .....      |
| FCC2                | .....       | .....      | .....      | .....       | .....      | .....      | .....      | .....      |
| HB3                 | .....       | .....      | .....      | .....       | .....      | .....      | .....      | .....      |
| 7G8                 | .....       | .....      | .....      | .....       | .....      | .....      | .....      | .....      |
| <i>P.reichenowi</i> | .....G..... | .....      | .....      | .....C..... | .....      | .....      | .....      | .....      |

|                     |           |           |            |            |             |            |            |            |
|---------------------|-----------|-----------|------------|------------|-------------|------------|------------|------------|
|                     | 730       | 740       | 750        | 760        | 770         | 780        | 790        | 800        |
| PF0615c             | TTCAATTAA | GTGGGAAAA | TGAAAACCTA | GAAAATAAAC | TTAAATTAAC  | AAATATAATT | ATGGATCATT | ATAATAATAC |
| 3D7                 | .....     | .....     | .....      | .....      | .....       | .....      | .....      | .....      |
| RO33                | .....     | .....     | .....      | .....      | .....       | .....      | .....      | .....      |
| Palo_Alto           | .....     | .....     | .....      | .....      | .....       | .....      | .....      | .....      |
| FCR3                | .....     | .....     | .....      | .....      | .....       | .....      | .....      | .....      |
| Wellcome            | .....     | .....     | .....      | .....      | .....       | .....      | .....      | .....      |
| D6                  | .....     | .....     | .....      | .....      | .....       | .....      | .....      | .....      |
| T996                | .....     | .....     | .....      | .....      | .....       | .....      | .....      | .....      |
| T9102               | .....     | .....     | .....      | .....      | .....       | .....      | .....      | .....      |
| K1                  | .....     | .....     | .....      | .....      | .....C..... | .....      | .....      | .....      |
| Dd2                 | .....     | .....     | .....      | .....      | .....C..... | .....      | .....      | .....      |
| D10                 | .....     | .....     | .....      | .....      | .....       | .....      | .....      | .....      |
| FCC2                | .....     | .....     | .....      | .....      | .....       | .....      | .....      | .....      |
| HB3                 | .....     | .....     | .....      | .....      | .....       | .....      | .....      | .....      |
| 7G8                 | .....     | .....     | .....      | .....      | .....       | .....      | .....      | .....      |
| <i>P.reichenowi</i> | .....     | .....     | .....      | .....      | .....       | .....      | .....      | .....      |

|                     |            |            |            |             |            |            |            |           |
|---------------------|------------|------------|------------|-------------|------------|------------|------------|-----------|
|                     | 810        | 820        | 830        | 840         | 850        | 860        | 870        | 880       |
| PF0615c             | TTTCTATTCA | AGATTACCAA | GTTTAATTTC | TGATAATTGG  | AAATTCITTT | GTGTATGTTC | AAAAGATAAT | GAAAAAAAT |
| 3D7                 | .....      | .....      | .....      | .....       | .....      | .....      | .....      | .....     |
| RO33                | .....      | .....      | .....      | .....       | .....      | .....      | .....      | .....     |
| Palo_Alto           | .....      | .....      | .....      | .....       | .....      | .....      | .....      | .....     |
| FCR3                | .....      | .....      | .....      | .....       | .....      | .....      | .....      | .....     |
| Wellcome            | .....      | .....      | .....      | .....       | .....      | .....      | .....      | .....     |
| D6                  | .....      | .....      | .....      | .....       | .....      | .....      | .....      | .....     |
| T996                | .....      | .....      | .....      | .....       | .....      | .....      | .....      | .....     |
| T9102               | .....      | .....      | .....      | .....       | .....      | .....      | .....      | .....     |
| K1                  | .....      | .....      | .....      | .....       | .....      | .....      | .....      | .....     |
| Dd2                 | .....      | .....      | .....      | .....       | .....      | .....      | .....      | .....     |
| D10                 | .....      | .....      | .....      | .....       | .....      | .....      | .....      | .....     |
| FCC2                | .....      | .....      | .....      | .....       | .....      | .....      | .....      | .....     |
| HB3                 | .....      | .....      | .....      | .....       | .....      | .....      | .....      | .....     |
| 7G8                 | .....      | .....      | .....      | .....       | .....      | .....      | .....      | .....     |
| <i>P.reichenowi</i> | .....      | .....      | .....      | .....C..... | .....      | .....      | .....      | .....     |

|                     |            |             |            |            |             |             |            |             |
|---------------------|------------|-------------|------------|------------|-------------|-------------|------------|-------------|
|                     | 890        | 900         | 910        | 920        | 930         | 940         | 950        | 960         |
| PF0615c             | TAGTCTTTAC | CGTAGAAGCA  | AGCATTTCAT | CAAGTAATAC | TAAACTTGCT  | TCAAGAGATA  | ATACATACCA | AGATTATATA  |
| 3D7                 | .....      | .....       | .....      | .....      | .....       | .....       | .....      | .....       |
| RO33                | .....      | .....       | .....      | .....      | .....       | .....       | .....      | .....       |
| Palo_Alto           | .....      | .....       | .....      | .....      | .....       | .....       | .....      | .....       |
| FCR3                | .....      | .....       | .....      | .....      | .....T..... | .....       | .....      | .....       |
| Wellcome            | .....      | .....       | .....      | .....      | .....T..... | .....       | .....      | .....       |
| D6                  | .....      | .....       | .....      | .....      | .....       | .....       | .....      | .....       |
| T996                | .....      | .....       | .....      | .....      | .....       | .....       | .....      | .....       |
| T9102               | .....      | .....       | .....      | .....      | .....       | .....       | .....      | .....       |
| K1                  | .....      | .....       | .....      | .....      | .....       | .....       | .....      | .....       |
| Dd2                 | .....      | .....       | .....      | .....      | .....       | .....       | .....      | .....       |
| D10                 | .....      | .....       | .....      | .....      | .....       | .....       | .....      | .....       |
| FCC2                | .....      | .....       | .....      | .....      | .....T..... | .....       | .....      | .....       |
| HB3                 | .....      | .....       | .....      | .....      | .....       | .....       | .....      | .....       |
| 7G8                 | .....      | .....       | .....      | .....      | .....       | .....       | .....      | .....       |
| <i>P.reichenowi</i> | .....      | .....A..... | .....      | .....      | .....       | .....C..... | .....      | .....A..... |

|                     | 970        | 980        | 990                  | 1000                 | 1010                 | 1020       | 1030       | 1040            |
|---------------------|------------|------------|----------------------|----------------------|----------------------|------------|------------|-----------------|
| PF0615c             | .... ....  | .... ....  | .... ....            | .... ....            | .... ....            | .... ....  | .... ....  | .... ....       |
| 3D7                 | TCCAACCTCT | CTTCTTAAAC | CCTTTCATCA           | TATTGTGCCT           | TCATCACTTT           | TATTATCACA | TCATTCTTAT | CATTCATCTT ATAA |
| RO33                | .....      | .....      | .....                | .....                | .....                | .....      | .....      | .....           |
| Palo Alto           | .....      | .....      | .....                | .....                | .....                | .....      | .....      | .....           |
| FCR3                | .....      | .....      | .....                | .....                | .....                | .....      | .....      | .....           |
| Wellcome            | .....      | .....      | .....                | .....                | .....                | .....      | .....      | .....           |
| D6                  | .....      | .....      | .....                | .....                | .....                | .....      | .....      | .....           |
| T996                | .....      | .....      | .....                | .....                | .....                | .....      | .....      | .....           |
| T9102               | .....      | .....      | .....                | .....                | .....                | .....      | .....      | .....           |
| K1                  | .....      | .....      | .....                | .....                | .....                | .....      | .....      | .....           |
| Dd2                 | .....      | .....      | .....                | .....                | .....                | .....      | .....      | .....           |
| D10                 | .....      | .....      | .....                | .....                | .....                | .....      | .....      | .....           |
| FCC2                | .....      | .....      | .....                | .....                | .....                | .....      | .....      | .....           |
| HB3                 | .....      | .....      | .....                | .....                | .....                | .....      | .....      | .....           |
| 7G8                 | .....      | .....      | .....                | .....                | .....                | .....      | .....      | .....           |
| <i>P.reichenowi</i> | .....      | .....      | ..... <b>T</b> ..... | ..... <b>A</b> ..... | ..... <b>C</b> ..... | .....      | .....      | .....           |

**PF13\_0338**

|                     | 10         | 20         | 30         | 40                   | 50         | 60         | 70                   | 80                   |
|---------------------|------------|------------|------------|----------------------|------------|------------|----------------------|----------------------|
| PF13_0338           | .... ....  | .... ....  | .... ....  | .... ....            | .... ....  | .... ....  | .... ....            | .... ....            |
| 3D7                 | ATGTTTGCTG | TAAACTTAAA | AATTGTGATA | TTTTGTGCAC           | TTGTTTCATT | TTGTTTACAA | TGTAAGAATA           | CACCTTGCTAA          |
| RO33                | .....      | .....      | .....      | .....                | .....      | .....      | .....                | .....                |
| Palo Alto           | .....      | .....      | .....      | .....                | .....      | .....      | .....                | .....                |
| FCR3                | .....      | .....      | .....      | .....                | .....      | .....      | .....                | .....                |
| Wellcome            | .....      | .....      | .....      | .....                | .....      | .....      | .....                | .....                |
| D6                  | .....      | .....      | .....      | .....                | .....      | .....      | .....                | .....                |
| T996                | .....      | .....      | .....      | .....                | .....      | .....      | .....                | .....                |
| T9102               | .....      | .....      | .....      | .....                | .....      | .....      | .....                | .....                |
| K1                  | .....      | .....      | .....      | .....                | .....      | .....      | .....                | .....                |
| Dd2                 | .....      | .....      | .....      | .....                | .....      | .....      | .....                | .....                |
| FCC2                | .....      | .....      | .....      | .....                | .....      | .....      | .....                | .....                |
| HB3                 | .....      | .....      | .....      | .....                | .....      | .....      | .....                | .....                |
| 7G8                 | .....      | .....      | .....      | .....                | .....      | .....      | .....                | .....                |
| <i>P.reichenowi</i> | .....      | .....      | .....      | ..... <b>G</b> ..... | .....      | .....      | ..... <b>C</b> ..... | ..... <b>G</b> ..... |

|                     | 90         | 100                  | 110                  | 120                  | 130                  | 140                   | 150                  | 160        |
|---------------------|------------|----------------------|----------------------|----------------------|----------------------|-----------------------|----------------------|------------|
| PF13_0338           | .... ....  | .... ....            | .... ....            | .... ....            | .... ....            | .... ....             | .... ....            | .... ....  |
| 3D7                 | TGTAACITTT | GAACAAAAGG           | TACAGACAAA           | TTTAAGTCAT           | GATAAAAATG           | GAGATATAGT            | ATATGGACAC           | AGAGAATTTA |
| RO33                | .....      | .....                | .....                | .....                | .....                | .....                 | .....                | .....      |
| Palo Alto           | .....      | .....                | .....                | .....                | .....                | .....                 | .....                | .....      |
| FCR3                | .....      | .....                | .....                | .....                | .....                | .....                 | .....                | .....      |
| Wellcome            | .....      | .....                | .....                | .....                | .....                | .....                 | .....                | .....      |
| D6                  | .....      | .....                | .....                | .....                | .....                | .....                 | .....                | .....      |
| T996                | .....      | .....                | .....                | .....                | .....                | .....                 | .....                | .....      |
| T9102               | .....      | .....                | .....                | .....                | .....                | .....                 | .....                | .....      |
| K1                  | .....      | .....                | .....                | .....                | .....                | .....                 | .....                | .....      |
| Dd2                 | .....      | .....                | .....                | .....                | .....                | .....                 | .....                | .....      |
| D10                 | .....      | .....                | .....                | .....                | .....                | .....                 | .....                | .....      |
| FCC2                | .....      | .....                | .....                | .....                | .....                | .....                 | .....                | .....      |
| HB3                 | .....      | .....                | .....                | .....                | .....                | .....                 | .....                | .....      |
| 7G8                 | .....      | .....                | .....                | .....                | .....                | .....                 | .....                | .....      |
| <i>P.reichenowi</i> | .....      | ..... <b>A</b> ..... | ..... <b>G</b> ..... | ..... <b>A</b> ..... | ..... <b>A</b> ..... | ..... <b>TG</b> ..... | ..... <b>T</b> ..... | .....      |

|                     | 170        | 180        | 190        | 200        | 210        | 220        | 230        | 240                  |
|---------------------|------------|------------|------------|------------|------------|------------|------------|----------------------|
| PF13_0338           | .... ....  | .... ....  | .... ....  | .... ....  | .... ....  | .... ....  | .... ....  | .... ....            |
| 3D7                 | AA-----    | -----      | -----      | -----      | -----      | -----      | -----      | -----                |
| RO33                | ..GGAGGTAT | AGTATATGGA | CACAGAGAAT | TTAAA----- | -----      | -----      | -----      | -----                |
| Palo Alto           | ..GGAGGTAT | AGTATATGGA | CACAGAGAAT | TTAAA----- | -----      | -----      | -----      | -----                |
| FCR3                | ..GGAGGTAT | AGTATATGGA | CACAGAGAAT | TTAAAGGAGG | TATAGTATAT | GGACACAGAG | AATTTAAA.. | -----                |
| Wellcome            | ..GGAGGTAT | AGTATATGGA | CACAGAGAAT | TTAAAGGAGG | TATAGTATAT | GGACACAGAG | AATTTAAA.. | -----                |
| D6                  | -----      | -----      | -----      | -----      | -----      | -----      | -----      | -----                |
| T996                | ..GGAGGTAT | AGTATATGGA | CACAGAGAAT | TTAAA----- | -----      | -----      | -----      | -----                |
| T9102               | -----      | -----      | -----      | -----      | -----      | -----      | -----      | -----                |
| K1                  | ..GGAGGTAT | AGTATATGGA | CACAGAGAAT | TTAAA----- | -----      | -----      | -----      | -----                |
| Dd2                 | -----      | -----      | -----      | -----      | -----      | -----      | -----      | -----                |
| D10                 | ..GGAGGTAT | AGTATATGGA | CACAGAGAAT | TTAAA----- | -----      | -----      | -----      | -----                |
| FCC2                | -----      | -----      | -----      | -----      | -----      | -----      | -----      | -----                |
| HB3                 | -----      | -----      | -----      | -----      | -----      | -----      | -----      | -----                |
| 7G8                 | -----      | -----      | -----      | -----      | -----      | -----      | -----      | -----                |
| <i>P.reichenowi</i> | -----      | -----      | -----      | -----      | -----      | -----      | -----      | ..... <b>G</b> ..... |

|                     | 250     | 260         | 270            | 280          | 290        | 300        | 310        | 320        |
|---------------------|---------|-------------|----------------|--------------|------------|------------|------------|------------|
| PF13_0338           | GCATTTT | GATATGACAA  | CTGTACAATA     | GAAAGTTAATA  | AAACAGTGAA | TGGAATAGAT | TGGAATGAAA | AAAAGGACGT |
| 3D7                 | .....   | .....       | .....          | .....        | .....      | .....      | .....      | .....      |
| RO33                | .....   | .....       | .....          | .....        | .....      | .....      | .....      | .....      |
| Palo Alto           | .....   | .....       | .....          | .....        | .....      | .....      | .....      | .....      |
| FCR3                | .....   | .....       | .....          | .....        | .....      | .....      | .....      | .....      |
| Wellcome            | .....   | .....       | .....          | .....        | .....      | .....      | .....      | .....      |
| D6                  | .....   | .....       | .....          | .....        | .....      | .....      | .....      | .....      |
| T996                | .....   | .....       | A.....         | .....        | .....      | .....      | .....      | .....      |
| T9102               | .....   | .....       | .....          | A.....       | .....      | .....      | .....      | .....      |
| K1                  | .....   | .....       | .....          | .....        | .....      | .....      | .....      | .....      |
| Dd2                 | .....   | .....       | .....          | A.....       | .....      | .....      | .....      | .....      |
| D10                 | .....   | .....       | .....          | .....        | .....      | .....      | .....      | .....      |
| FCC2                | .....   | .....       | .....          | A.....       | .....      | .....      | .....      | .....      |
| HB3                 | .....   | .....       | .....          | .....        | .....      | .....      | .....      | .....      |
| 7G8                 | .....   | .....       | .....          | A.....       | .....      | .....      | .....      | .....      |
| <i>P.reichenowi</i> | .....   | .....C..... | .....G..G..... | ......T..... | .....      | .....      | .....      | .....G..   |

|                     | 330        | 340        | 350        | 360         | 370       | 380        | 390        | 400       |
|---------------------|------------|------------|------------|-------------|-----------|------------|------------|-----------|
| PF13_0338           | AAAAGTAAGT | GGTAATAATA | ATATTGCTGT | AGTATATCC   | ATTTTACAA | GTGAAGAGAA | GATGATATTA | ATTTTAAAT |
| 3D7                 | .....      | .....      | .....      | .....       | .....     | .....      | .....      | .....     |
| RO33                | .....      | .....      | .....      | .....       | .....     | .....      | .....      | .....     |
| Palo Alto           | .....      | .....      | .....      | .....       | .....     | .....      | .....      | .....     |
| FCR3                | .....      | .....      | .....      | .....       | .....     | .....      | .....      | .....     |
| Wellcome            | .....      | .....      | .....      | .....       | .....     | .....      | .....      | .....     |
| D6                  | .....      | .....      | .....      | .....       | .....     | .....      | .....      | .....     |
| T996                | .....      | .....      | .....      | .....       | .....     | .....      | .....      | .....     |
| T9102               | .....      | .....      | .....      | .....       | .....     | .....      | .....      | .....     |
| K1                  | .....      | .....      | .....      | .....       | .....     | .....      | .....      | .....     |
| Dd2                 | .....      | .....      | .....      | .....       | .....     | .....      | .....      | .....     |
| D10                 | .....      | .....      | .....      | .....       | .....     | .....      | .....      | .....     |
| FCC2                | .....      | .....      | .....      | .....       | .....     | .....      | .....      | .....     |
| HB3                 | .....      | .....      | .....      | .....       | .....     | .....      | .....      | .....     |
| 7G8                 | .....      | .....      | .....      | .....       | .....     | .....      | .....      | .....     |
| <i>P.reichenowi</i> | .....      | .....      | .....      | .....A..... | .....     | .....      | .....      | .....     |

|                     | 410       | 420       | 430        | 440        | 450         | 460       | 470        | 480        |
|---------------------|-----------|-----------|------------|------------|-------------|-----------|------------|------------|
| PF13_0338           | GTGATAATA | ATTTTATAT | ACTAAATATG | GAAAAGAATT | TAAATGGTCA  | GATCCTAAG | TTATAGATGT | ATCTAATGTT |
| 3D7                 | .....     | .....     | .....      | .....      | .....       | .....     | .....      | .....      |
| RO33                | .....     | .....     | .....      | .....      | .....       | .....     | .....      | .....      |
| Palo Alto           | .....     | .....     | .....      | .....      | .....       | .....     | .....      | .....      |
| FCR3                | .....     | .....     | .....      | .....      | .....       | .....     | .....      | .....      |
| Wellcome            | .....     | .....     | .....      | .....      | .....       | .....     | .....      | .....      |
| D6                  | .....     | .....     | .....      | .....      | .....       | .....     | .....      | .....      |
| T996                | .....     | .....     | .....      | .....      | .....       | .....     | .....      | .....      |
| T9102               | .....     | .....     | .....      | .....      | .....       | .....     | .....      | .....      |
| K1                  | .....     | .....     | .....      | .....      | .....       | .....     | .....      | .....      |
| Dd2                 | .....     | .....     | .....      | .....      | .....       | .....     | .....      | .....      |
| D10                 | .....     | .....     | .....      | .....      | .....       | .....     | .....      | .....      |
| FCC2                | .....     | .....     | .....      | .....      | .....       | .....     | .....      | .....      |
| HB3                 | .....     | .....     | .....      | .....      | .....       | .....     | .....      | .....      |
| 7G8                 | .....     | .....     | .....      | .....      | .....       | .....     | .....      | .....      |
| <i>P.reichenowi</i> | .....     | .....     | .....      | .....      | .....G..... | .....A..C | .....      | .....      |

|                     | 490        | 500           | 510         | 520        | 530        | 540        | 550       | 560         |
|---------------------|------------|---------------|-------------|------------|------------|------------|-----------|-------------|
| PF13_0338           | ATTGGTACAA | ATACTACCC     | AGCTGTTTAC  | TCTGGTTCTT | TACTATCTAT | GAATAATGAT | TTTGAAAAT | ATATTTGGT   |
| 3D7                 | .....      | .....         | .....       | .....      | .....      | .....      | .....     | .....       |
| RO33                | .....      | .....         | .....       | .....      | .....      | .....      | .....     | .....       |
| Palo Alto           | .....      | .....         | .....       | .....      | .....      | .....      | .....     | .....       |
| FCR3                | .....      | .....         | .....       | .....      | .....      | .....      | .....     | .....       |
| Wellcome            | .....      | .....         | .....       | .....      | .....      | .....      | .....     | .....       |
| D6                  | .....      | .....         | .....       | .....      | .....      | .....      | .....     | .....       |
| T996                | .....      | .....         | .....       | .....      | .....      | .....      | .....     | .....       |
| T9102               | .....      | .....         | .....       | .....      | .....      | .....      | .....     | .....       |
| K1                  | .....      | .....         | .....       | .....      | .....      | .....      | .....     | .....       |
| Dd2                 | .....      | .....         | .....       | .....      | .....      | .....      | .....     | .....       |
| D10                 | .....      | .....         | .....       | .....      | .....      | .....      | .....     | .....       |
| FCC2                | .....      | .....         | .....       | .....      | .....      | .....      | .....     | .....       |
| HB3                 | .....      | .....         | .....       | .....      | .....      | .....      | .....     | .....       |
| 7G8                 | .....      | .....         | .....       | .....      | .....      | .....      | .....     | .....       |
| <i>P.reichenowi</i> | .....      | .....A.T..... | .....A..... | .....      | .....      | .....      | .....     | .....C..... |

|                     | 570        | 580        | 590        | 600        | 610        | 620         | 630        | 640        |
|---------------------|------------|------------|------------|------------|------------|-------------|------------|------------|
| PF13_0338           | TTGTGAAAAT | CATAGTCAGA | ATTATATAAA | TGTAGTAGAC | CAGGAATATA | TGAGAGAAAAT | ACGTTTATTA | GGTAAATGTA |
| 3D7                 | .....      | .....      | .....      | .....      | .....      | .....       | .....      | .....      |
| RO33                | .....      | .....      | .....      | .....      | .....      | .....       | .....      | .....      |
| Palo Alto           | .....      | .....      | .....      | .....      | .....      | .....       | .....      | .....      |
| FCR3                | .....      | .....      | .....      | .....      | .....      | .....       | .....      | .....      |
| Wellcome            | .....      | .....      | .....      | .....      | .....      | .....       | .....      | .....      |
| D6                  | .....      | .....      | .....      | .....      | .....      | .....       | .....      | .....      |
| T996                | .....      | .....      | .....      | .....      | .....      | .....       | .....      | .....      |
| T9102               | .....      | .....      | .....      | .....      | .....      | .....       | .....      | .....      |
| K1                  | .....      | .....      | .....      | .....      | .....      | .....       | .....      | .....      |
| Dd2                 | .....      | .....      | .....      | .....      | .....      | .....       | .....      | .....      |
| D10                 | .....      | .....      | .....      | .....      | .....      | .....       | .....      | .....      |
| FCC2                | .....      | .....      | .....      | .....      | .....      | .....       | .....      | .....      |
| HB3                 | .....      | .....      | .....      | .....      | .....      | .....       | .....      | .....      |
| 7G8                 | .....      | .....      | .....      | .....      | .....      | .....       | .....      | .....      |
| <i>P.reichenowi</i> | .....      | .....      | .....      | .....G..G  | .....A..   | .....       | .....      | .....      |

|                     | 650        | 660         | 670         | 680        | 690            | 700        | 710        | 720       |
|---------------------|------------|-------------|-------------|------------|----------------|------------|------------|-----------|
| PF13_0338           | TGTTATCTTT | TGATGAAGGA  | AATAACTGGA  | AGAATGAAGT | AATGAATTTA     | TATAGTGATG | AAGTTTATAC | AAAATTAAT |
| 3D7                 | .....      | .....       | .....       | .....      | .....          | .....      | .....      | .....     |
| RO33                | .....      | .....       | .....       | .....      | .....          | .....      | .....      | .....     |
| Palo Alto           | .....      | .....       | .....       | .....      | .....          | .....      | .....      | .....     |
| FCR3                | .....      | .....       | .....       | .....      | .....          | .....      | .....      | .....     |
| Wellcome            | .....      | .....       | .....       | .....      | .....          | .....      | .....      | .....     |
| D6                  | .....      | .....       | .....       | .....      | .....          | .....      | .....      | .....     |
| T996                | .....      | .....       | .....       | .....      | .....          | .....      | .....      | .....     |
| T9102               | .....      | .....       | .....       | .....      | .....          | .....      | .....      | .....     |
| K1                  | .....      | .....       | .....       | .....      | .....          | .....      | .....      | .....     |
| Dd2                 | .....      | .....       | .....       | .....      | .....          | .....      | .....      | .....     |
| D10                 | .....      | .....       | .....       | .....      | .....          | .....      | .....      | .....     |
| FCC2                | .....      | .....       | .....       | .....      | .....          | .....      | .....      | .....     |
| HB3                 | .....      | .....       | .....       | .....      | .....          | .....      | .....      | .....     |
| 7G8                 | .....      | .....       | .....       | .....      | .....          | .....      | .....      | .....     |
| <i>P.reichenowi</i> | .....      | .....C..... | .....A..... | .....      | .....G..G..... | .....      | .....      | .....     |

|                     | 730        | 740        | 750         | 760        | 770        | 780        | 790        | 800        |
|---------------------|------------|------------|-------------|------------|------------|------------|------------|------------|
| PF13_0338           | ACTTTAAGAT | TATCAGATTA | CGGAGGAAA   | ATACTTGTGA | AAGGAACTAA | TGCACAAAAT | CTTAACCAAA | CGATACGATC |
| 3D7                 | .....      | .....      | .....       | .....      | .....      | .....      | .....      | .....      |
| RO33                | .....      | .....      | .....       | .....      | .....      | .....      | .....      | .....      |
| Palo Alto           | .....      | .....      | .....       | .....      | .....      | .....      | .....      | .....      |
| FCR3                | .....      | .....      | .....       | .....      | .....      | .....      | .....      | .....      |
| Wellcome            | .....      | .....      | .....       | .....      | .....      | .....      | .....      | .....      |
| D6                  | .....      | .....      | .....       | .....      | .....      | .....      | .....      | .....      |
| T996                | .....      | .....      | .....       | .....      | .....      | .....      | .....      | .....      |
| T9102               | .....      | .....      | .....       | .....      | .....      | .....      | .....      | .....      |
| K1                  | .....      | .....      | .....       | .....      | .....      | .....      | .....      | .....      |
| Dd2                 | .....      | .....      | .....       | .....      | .....      | .....      | .....      | .....      |
| D10                 | .....      | .....      | .....       | .....      | .....      | .....      | .....      | .....      |
| FCC2                | .....      | .....      | .....       | .....      | .....      | .....      | .....      | .....      |
| HB3                 | .....      | .....      | .....       | .....      | .....      | .....      | .....      | .....      |
| 7G8                 | .....      | .....      | .....       | .....      | .....      | .....      | .....      | .....      |
| <i>P.reichenowi</i> | .....      | .....      | .....T..... | .....      | .....      | .....      | .....      | .....      |

|                     | 810               | 820        | 830         | 840        | 850       | 860        | 870        | 880         |
|---------------------|-------------------|------------|-------------|------------|-----------|------------|------------|-------------|
| PF13_0338           | CATAATCTTT        | TTATGTAGTA | ATTTCATGA   | TTGGAAATTA | TTTGTGGAC | TTCTTACCAT | AAGATTCAGG | AAGGATATTT  |
| 3D7                 | .....             | .....      | .....       | .....      | .....     | .....      | .....      | .....       |
| RO33                | .....             | .....      | .....       | .....      | .....     | .....      | .....      | .....       |
| Palo Alto           | .....             | .....      | .....       | .....      | .....     | .....      | .....      | .....       |
| FCR3                | .....             | .....      | .....       | .....      | .....     | .....      | .....      | .....       |
| Wellcome            | .....             | .....      | .....       | .....      | .....     | .....      | .....      | .....       |
| D6                  | .....             | .....      | .....       | .....      | .....     | .....      | .....      | .....       |
| T996                | .....             | .....      | .....       | .....      | .....     | .....      | .....      | .....       |
| T9102               | .....             | .....      | .....       | .....      | .....     | .....      | .....      | .....       |
| K1                  | .....             | .....      | .....       | .....      | .....     | .....      | .....      | .....       |
| Dd2                 | .....             | .....      | .....       | .....      | .....     | .....      | .....      | .....       |
| D10                 | .....             | .....      | .....       | .....      | .....     | .....      | .....      | .....       |
| FCC2                | .....             | .....      | .....       | .....      | .....     | .....      | .....      | .....       |
| HB3                 | .....             | .....      | .....       | .....      | .....     | .....      | .....      | .....       |
| 7G8                 | .....             | .....      | .....       | .....      | .....     | .....      | .....      | .....       |
| <i>P.reichenowi</i> | .....A.....A..... | .....      | .....A..... | .....      | .....     | .....      | .....      | .....C..... |

|                     | 890        | 900        | 910         | 920        | 930         | 940        | 950        | 960        |
|---------------------|------------|------------|-------------|------------|-------------|------------|------------|------------|
| PF13_0338           | CAGTAGAAAA | TCTAACATAT | TTAAATACTT  | ATCATCTAGC | CATTGTAAAA  | AATGAAGATA | AATTACAATT | AGCTTTTACA |
| 3D7                 | .....      | .....      | .....       | .....      | .....       | .....      | .....      | .....      |
| RO33                | .....      | .....      | .....       | .....      | .....       | .....      | .....      | .....      |
| Palo Alto           | .....      | .....      | .....       | .....      | .....       | .....      | .....      | .....      |
| FCR3                | .....      | .....      | .....       | .....      | .....       | .....      | .....      | .....      |
| Wellcome            | .....      | .....      | .....       | .....      | .....       | .....      | .....      | .....      |
| D6                  | .....      | .....      | .....       | .....      | .....       | .....      | .....      | .....      |
| T996                | .....      | .....      | .....       | .....      | .....A..... | .....      | .....      | .....      |
| T9102               | .....      | .....      | .....       | .....      | .....       | .....      | .....      | .....      |
| K1                  | .....      | .....      | .....       | .....      | .....       | .....      | .....      | .....      |
| Dd2                 | .....      | .....      | .....       | .....      | .....       | .....      | .....      | .....      |
| D10                 | .....      | .....      | .....       | .....      | .....       | .....      | .....      | .....      |
| FCC2                | .....      | .....      | .....       | .....      | .....       | .....      | .....      | .....      |
| HB3                 | .....      | .....      | .....       | .....      | .....       | .....      | .....      | .....      |
| 7G8                 | .....      | .....      | .....       | .....      | .....       | .....      | .....      | .....      |
| <i>P.reichenowi</i> | .....      | .....      | .....T..... | .....      | .....       | .....      | .....      | .....      |

|                     | 970        | 980       | 990         | 1000        | 1010          | 1020       | 1030        | 1040        |
|---------------------|------------|-----------|-------------|-------------|---------------|------------|-------------|-------------|
| PF13_0338           | TATGATTTAT | TTGAAACAT | TGATCCGCAA  | TATTGAACA   | CTGAATTAA     | TGGTGTTTCT | CATTATTTTG  | TTTAGCTCC   |
| 3D7                 | .....      | .....     | .....       | .....       | .....         | .....      | .....       | .....       |
| RO33                | .....      | .....     | .....       | .....       | .....         | .....      | .....       | .....       |
| Palo Alto           | .....      | .....     | .....       | .....       | .....         | .....      | .....       | .....       |
| FCR3                | .....      | .....     | .....       | .....       | .....         | .....      | .....       | .....       |
| Wellcome            | .....      | .....     | .....       | .....       | .....         | .....      | .....       | .....       |
| D6                  | .....      | .....     | .....       | .....       | .....         | .....      | .....       | .....       |
| T996                | .....      | .....     | .....       | .....       | .....         | .....      | .....       | .....       |
| T9102               | .....      | .....     | .....       | .....       | .....         | .....      | .....       | .....       |
| K1                  | .....      | .....     | .....       | .....       | .....         | .....      | .....       | .....       |
| Dd2                 | .....      | .....     | .....       | .....       | .....         | .....      | .....       | .....       |
| D10                 | .....      | .....     | .....       | .....       | .....         | .....      | .....       | .....       |
| FCC2                | .....      | .....     | .....       | .....       | .....         | .....      | .....       | .....       |
| HB3                 | .....      | .....     | .....       | .....       | .....         | .....      | .....       | .....       |
| 7G8                 | .....      | .....     | .....       | .....       | .....         | .....      | .....       | .....       |
| <i>P.reichenowi</i> | .....      | .....     | .....A..... | .....T..... | .....TGT..... | .....      | .....C..... | .....A..... |

|                     | 1050       | 1060       | 1070        | 1080        | 1090        | 1100       | 1110        | 1120       |
|---------------------|------------|------------|-------------|-------------|-------------|------------|-------------|------------|
| PF13_0338           | TGATGAAATG | GTATATTTAT | TTTATCATGG  | AAATGAGAAA  | AAAAATTATG  | TCATAAAAAT | AAAAACAGTA  | CCAAGAAAAA |
| 3D7                 | .....      | .....      | .....       | .....       | .....       | .....      | .....       | .....      |
| RO33                | .....      | .....      | .....       | .....       | .....       | .....      | .....       | .....      |
| Palo Alto           | .....      | .....      | .....       | .....       | .....       | .....      | .....       | .....      |
| FCR3                | .....      | .....      | .....       | .....       | .....       | .....      | .....       | .....      |
| Wellcome            | .....      | .....      | .....       | .....       | .....       | .....      | .....       | .....      |
| D6                  | .....      | .....      | .....       | .....       | .....       | .....      | .....       | .....      |
| T996                | .....      | .....      | .....       | .....       | .....       | .....      | .....       | .....      |
| T9102               | .....      | .....      | .....       | .....       | .....       | .....      | .....       | .....      |
| K1                  | .....      | .....      | .....       | .....       | .....       | .....      | .....       | .....      |
| Dd2                 | .....      | .....      | .....       | .....       | .....       | .....      | .....       | .....      |
| D10                 | .....      | .....      | .....       | .....       | .....       | .....      | .....       | .....      |
| FCC2                | .....      | .....      | .....       | .....       | .....       | .....      | .....       | .....      |
| HB3                 | .....      | .....      | .....       | .....       | .....       | .....      | .....       | .....      |
| 7G8                 | .....      | .....      | .....       | .....       | .....       | .....      | .....       | .....      |
| <i>P.reichenowi</i> | .....      | .....      | .....G..... | .....A..... | .....G..... | .....      | .....A..... | .....      |

|                     | 1130        | 1140       | 1150       | 1160        | 1170       | 1180        | 1190        | 1200         |
|---------------------|-------------|------------|------------|-------------|------------|-------------|-------------|--------------|
| PF13_0338           | TAGGTTGTGA  | ATTAAATACA | AATGATACTG | TAAATAAAAT  | TTATACATAC | ACGTATAAAT  | ATATATATAA  | TAATAAGCTA   |
| 3D7                 | .....       | .....      | .....      | .....       | .....      | .....       | .....       | .....        |
| RO33                | .....       | .....      | .....      | .....C..... | .....      | .....       | .....       | .....        |
| Palo Alto           | .....       | .....      | .....      | .....       | .....      | .....       | .....       | .....        |
| FCR3                | .....       | .....      | .....      | .....C..... | .....      | .....       | .....       | .....        |
| Wellcome            | .....       | .....      | .....      | .....C..... | .....      | .....       | .....       | .....        |
| D6                  | .....       | .....      | .....      | .....C..... | .....      | .....       | .....       | .....        |
| T996                | .....       | .....      | .....      | .....C..... | .....      | .....       | .....       | .....        |
| T9102               | .....       | .....      | .....      | .....C..... | .....      | .....       | .....       | .....        |
| K1                  | .....       | .....      | .....      | .....C..... | .....      | .....       | .....       | .....        |
| Dd2                 | .....       | .....      | .....      | .....C..... | .....      | .....       | .....       | .....        |
| D10                 | .....       | .....      | .....      | .....C..... | .....      | .....       | .....       | .....        |
| FCC2                | .....       | .....      | .....      | .....C..... | .....      | .....       | .....       | .....        |
| HB3                 | .....       | .....      | .....      | .....C..... | .....      | .....       | .....       | .....        |
| 7G8                 | .....       | .....      | .....      | .....C..... | .....      | .....       | .....       | .....        |
| <i>P.reichenowi</i> | .....A..... | .....      | .....      | .....       | .....      | .....T..... | .....C..... | .....CT..... |

|                     | 1210  | 1220  | 1230  | 1240  | 1250  | 1260  | 1270  | 1280  |
|---------------------|-------|-------|-------|-------|-------|-------|-------|-------|
| PF13_0338           | AGTGC | CATGT | TCCAT | CATT  | ATT   | TGGT  | AAAT  | AGGTA |
| 3D7                 | ..... | ..... | ..... | ..... | ..... | ..... | ..... | ..... |
| RO33                | ..... | ..... | ..... | ..... | ..... | ..... | ..... | ..... |
| Palo Alto           | ..... | ..... | ..... | ..... | ..... | ..... | ..... | ..... |
| FCR3                | ..C.  | ..... | ..... | ..... | ..... | ..... | ..... | ..... |
| Wellcome            | ..C.  | ..... | ..... | ..... | ..... | ..... | ..... | ..... |
| D6                  | ..... | ..... | ..... | ..... | ..... | ..... | ..... | ..... |
| T996                | ..... | ..... | ..... | ..... | ..... | ..... | ..... | ..... |
| T9102               | ..C.  | ..... | ..... | ..... | ..... | ..... | ..... | ..... |
| K1                  | ..C.  | ..... | ..... | ..... | ..... | ..... | ..... | ..... |
| Dd2                 | ..C.  | ..... | ..... | ..... | ..... | ..... | ..... | ..... |
| D10                 | ..C.  | ..... | ..... | ..... | ..... | ..... | ..... | ..... |
| FCC2                | ..... | ..... | ..... | ..... | ..... | ..... | ..... | ..... |
| HB3                 | ..... | ..... | ..... | ..... | ..... | ..... | ..... | ..... |
| 7G8                 | ..... | ..... | ..... | ..... | ..... | ..... | ..... | ..... |
| <i>P.reichenowi</i> | ..C.  | ..... | ..... | ..... | ..... | ..... | ..... | ..... |

|                     | 1290  | 1300  | 1310  | 1320  | 1330  | 1340  | 1350  | 1360   |
|---------------------|-------|-------|-------|-------|-------|-------|-------|--------|
| PF13_0338           | ACCAA | ATAAA | CTGAA | TTTT  | TCTTT | GTGAT | TAATA | CATACA |
| 3D7                 | ..... | ..... | ..... | ..... | ..... | ..... | ..... | .....  |
| RO33                | ..... | ..... | ..... | ..... | ..... | ..... | ..... | .....  |
| Palo Alto           | ..... | ..... | ..... | ..... | ..... | ..... | ..... | .....  |
| FCR3                | ..... | ..... | ..... | ..... | ..... | ..... | ..... | .....  |
| Wellcome            | ..... | ..... | ..... | ..... | ..... | ..... | ..... | .....  |
| D6                  | ..... | ..... | ..... | ..... | ..... | ..... | ..... | .....  |
| T996                | ..... | ..... | ..... | ..... | ..... | ..A.  | ..... | .....  |
| T9102               | ..... | ..... | ..... | ..... | ..... | ..... | ..... | .....  |
| K1                  | ..... | ..... | ..... | ..... | ..... | ..... | ..... | .....  |
| Dd2                 | ..... | ..... | ..... | ..... | ..... | ..... | ..... | .....  |
| D10                 | ..... | ..... | ..... | ..... | ..... | ..... | ..... | .....  |
| FCC2                | ..... | ..... | ..... | ..... | ..... | ..... | ..... | .....  |
| HB3                 | ..... | ..... | ..... | ..... | ..... | ..A.  | ..... | .....  |
| 7G8                 | ..... | ..... | ..... | ..... | ..... | ..... | ..... | .....  |
| <i>P.reichenowi</i> | ..... | ..... | ..... | ..T.  | ..A.  | ..... | ..... | ..T.   |

|                     | 1370  | 1380  | 1390  | 1400  | 1410  | 1420  | 1430  | 1440   |
|---------------------|-------|-------|-------|-------|-------|-------|-------|--------|
| PF13_0338           | TCATA | ACGAG | AACAA | AAGAT | AGAAG | TTTCA | CGATT | TACTAA |
| 3D7                 | ..... | ..... | ..... | ..... | ..... | ..... | ..... | .....  |
| RO33                | ..... | ..... | ..... | ..... | ..... | ..... | ..... | .....  |
| Palo Alto           | ..... | ..... | ..... | ..... | ..... | ..... | ..... | .....  |
| FCR3                | ..... | ..... | ..... | ..... | ..... | ..... | ..... | .....  |
| Wellcome            | ..... | ..... | ..... | ..... | ..... | ..... | ..... | .....  |
| D6                  | ..... | ..... | ..... | ..... | ..... | ..... | ..... | .....  |
| T996                | ..... | ..... | ..... | ..... | ..... | ..... | ..... | .....  |
| T9102               | ..... | ..... | ..... | ..... | ..... | ..... | ..... | .....  |
| K1                  | ..... | ..... | ..... | ..... | ..... | ..... | ..... | .....  |
| Dd2                 | ..... | ..... | ..... | ..... | ..... | ..... | ..... | .....  |
| D10                 | ..... | ..... | ..... | ..... | ..... | ..... | ..... | .....  |
| FCC2                | ..... | ..... | ..... | ..... | ..... | ..... | ..... | .....  |
| HB3                 | ..... | ..... | ..... | ..... | ..... | ..... | ..... | .....  |
| 7G8                 | ..... | ..... | ..... | ..... | ..... | ..... | ..... | .....  |
| <i>P.reichenowi</i> | ..A.  | ..A.  | ..... | ..... | ..... | ..... | ..... | .....  |

|                     | 1450  | 1460  | 1470  | 1480  | 1490  | 1500  | 1510  | 1520   |
|---------------------|-------|-------|-------|-------|-------|-------|-------|--------|
| PF13_0338           | TTATA | ATAAA | GTATT | TTGAG | ACTAT | AGTTG | TTGAT | TACGTA |
| 3D7                 | ..... | ..... | ..... | ..... | ..... | ..... | ..... | .....  |
| RO33                | ..... | ..... | ..... | ..... | ..... | ..... | ..... | .....  |
| Palo Alto           | ..... | ..... | ..... | ..... | ..... | ..... | ..... | .....  |
| FCR3                | ..... | ..... | ..... | ..... | ..... | ..... | ..... | .....  |
| Wellcome            | ..... | ..... | ..... | ..... | ..... | ..... | ..... | .....  |
| D6                  | ..... | ..... | ..... | ..... | ..... | ..... | ..... | .....  |
| T996                | ..... | ..... | ..... | ..... | ..... | ..... | ..... | .....  |
| T9102               | ..... | ..... | ..... | ..... | ..... | ..... | ..... | .....  |
| K1                  | ..... | ..... | ..... | ..... | ..... | ..... | ..... | .....  |
| Dd2                 | ..... | ..... | ..... | ..... | ..... | ..... | ..... | .....  |
| D10                 | ..... | ..... | ..... | ..... | ..... | ..... | ..... | .....  |
| FCC2                | ..... | ..... | ..... | ..... | ..... | ..... | ..... | .....  |
| HB3                 | ..... | ..... | ..... | ..... | ..... | ..... | ..... | .....  |
| 7G8                 | ..... | ..... | ..... | ..... | ..... | ..... | ..... | .....  |
| <i>P.reichenowi</i> | ..... | ..... | ..A.  | ..... | ..... | ..... | ..... | .....  |



|                     | 1530       | 1540                 | 1550       | 1560       | 1570       | 1580                 | 1590       | 1600        |
|---------------------|------------|----------------------|------------|------------|------------|----------------------|------------|-------------|
| PF13_0338           | TATTGATCTA | GATTTTCCGT           | TTGATACAGA | TACTGTAAAG | TTATATAGTA | ATGAAAGTGT           | TACACATGCA | TTTAGAAAATA |
| 3D7                 | .....      | .....                | .....      | .....      | .....      | .....                | .....      | .....       |
| RO33                | .....      | .....                | .....      | .....      | .....      | .....                | .....      | .....       |
| Palo Alto           | .....      | .....                | .....      | .....      | .....      | .....                | .....      | .....       |
| FCR3                | .....      | .....                | .....      | .....      | .....      | .....                | .....      | .....       |
| Wellcome            | .....      | .....                | .....      | .....      | .....      | .....                | .....      | .....       |
| D6                  | .....      | .....                | .....      | .....      | .....      | .....                | .....      | .....       |
| T996                | .....      | .....                | .....      | .....      | .....      | .....                | .....      | .....       |
| T9102               | .....      | .....                | .....      | .....      | .....      | .....                | .....      | .....       |
| K1                  | .....      | .....                | .....      | .....      | .....      | .....                | .....      | .....       |
| Dd2                 | .....      | .....                | .....      | .....      | .....      | .....                | .....      | .....       |
| D10                 | .....      | .....                | .....      | .....      | .....      | .....                | .....      | .....       |
| FCC2                | .....      | .....                | .....      | .....      | .....      | .....                | .....      | .....       |
| HB3                 | .....      | .....                | .....      | .....      | .....      | .....                | .....      | .....       |
| 7G8                 | .....      | .....                | .....      | .....      | .....      | .....                | .....      | .....       |
| <i>P.reichenowi</i> | .....      | ..... <b>C</b> ..... | .....      | .....      | .....      | ..... <b>T</b> ..... | .....      | .....       |

|                     | 1610                 | 1620                   | 1630                                | 1640                 | 1650                 | 1660       | 1670      | 1680       |
|---------------------|----------------------|------------------------|-------------------------------------|----------------------|----------------------|------------|-----------|------------|
| PF13_0338           | ATACAGAAA            | AACACATGTG             | CATAAATTTC                          | CTAAAGGTAC           | ATATATGACA           | TCTTATTTTA | GTTATGAAA | AGAATATGTT |
| 3D7                 | .....                | .....                  | .....                               | .....                | .....                | .....      | .....     | .....      |
| RO33                | .....                | .....                  | .....                               | .....                | .....                | .....      | .....     | .....      |
| Palo Alto           | .....                | .....                  | .....                               | .....                | .....                | .....      | .....     | .....      |
| FCR3                | .....                | .....                  | .....                               | .....                | .....                | .....      | .....     | .....      |
| Wellcome            | .....                | .....                  | .....                               | .....                | .....                | .....      | .....     | .....      |
| D6                  | .....                | .....                  | .....                               | .....                | .....                | .....      | .....     | .....      |
| T996                | .....                | .....                  | .....                               | .....                | .....                | .....      | .....     | .....      |
| T9102               | .....                | .....                  | .....                               | .....                | .....                | .....      | .....     | .....      |
| K1                  | .....                | .....                  | .....                               | .....                | .....                | .....      | .....     | .....      |
| Dd2                 | .....                | .....                  | .....                               | .....                | .....                | .....      | .....     | .....      |
| D10                 | .....                | .....                  | .....                               | .....                | .....                | .....      | .....     | .....      |
| FCC2                | .....                | .....                  | .....                               | .....                | .....                | .....      | .....     | .....      |
| HB3                 | .....                | .....                  | .....                               | .....                | .....                | .....      | .....     | .....      |
| 7G8                 | .....                | .....                  | .....                               | .....                | .....                | .....      | .....     | .....      |
| <i>P.reichenowi</i> | ..... <b>G</b> ..... | ..... <b>CAA</b> ..... | ..... <b>G</b> ..... <b>G</b> ..... | ..... <b>C</b> ..... | ..... <b>T</b> ..... | .....      | .....     | .....      |

|                     | 1690       | 1700                 | 1710                 | 1720                 | 1730                 | 1740                 | 1750                 | 1760       |
|---------------------|------------|----------------------|----------------------|----------------------|----------------------|----------------------|----------------------|------------|
| PF13_0338           | ATATCTAATT | ATATAGAAGA           | ACCATTTTCT           | ACTACCTTTA           | CTATATTAAC           | CCAAACACAA           | ATGAATGTTT           | ATTTTATGGC |
| 3D7                 | .....      | .....                | .....                | .....                | .....                | .....                | .....                | .....      |
| RO33                | .....      | ..... <b>A</b> ..... | .....                | .....                | .....                | .....                | .....                | .....      |
| Palo Alto           | .....      | .....                | .....                | .....                | .....                | .....                | .....                | .....      |
| FCR3                | .....      | .....                | .....                | .....                | .....                | .....                | .....                | .....      |
| Wellcome            | .....      | .....                | .....                | .....                | .....                | .....                | .....                | .....      |
| D6                  | .....      | .....                | .....                | .....                | .....                | .....                | .....                | .....      |
| T996                | .....      | .....                | .....                | .....                | .....                | .....                | .....                | .....      |
| T9102               | .....      | .....                | .....                | .....                | .....                | .....                | .....                | .....      |
| K1                  | .....      | .....                | .....                | .....                | .....                | .....                | .....                | .....      |
| Dd2                 | .....      | .....                | .....                | .....                | .....                | .....                | .....                | .....      |
| D10                 | .....      | .....                | .....                | .....                | .....                | .....                | .....                | .....      |
| FCC2                | .....      | .....                | .....                | .....                | .....                | .....                | .....                | .....      |
| HB3                 | .....      | ..... <b>A</b> ..... | .....                | .....                | .....                | .....                | .....                | .....      |
| 7G8                 | .....      | ..... <b>A</b> ..... | .....                | .....                | .....                | .....                | .....                | .....      |
| <i>P.reichenowi</i> | .....      | ..... <b>A</b> ..... | ..... <b>A</b> ..... | ..... <b>A</b> ..... | ..... <b>A</b> ..... | ..... <b>A</b> ..... | ..... <b>A</b> ..... | .....      |

|                     | 1770       | 1780       | 1790       | 1800       | 1810       | 1820                 | 1830       | 1840                          |
|---------------------|------------|------------|------------|------------|------------|----------------------|------------|-------------------------------|
| PF13_0338           | TGGTGGACAA | AAATATAAAT | ATGAAGGTAT | CGATTTAACA | GATTCCTCAC | CAAACATGA            | ATTATCACTT | AATCTTTTGT                    |
| 3D7                 | .....      | .....      | .....      | .....      | .....      | .....                | .....      | .....                         |
| RO33                | .....      | .....      | .....      | .....      | .....      | .....                | .....      | .....                         |
| Palo Alto           | .....      | .....      | .....      | .....      | .....      | .....                | .....      | .....                         |
| FCR3                | .....      | .....      | .....      | .....      | .....      | .....                | .....      | .....                         |
| Wellcome            | .....      | .....      | .....      | .....      | .....      | .....                | .....      | .....                         |
| D6                  | .....      | .....      | .....      | .....      | .....      | .....                | .....      | .....                         |
| T996                | .....      | .....      | .....      | .....      | .....      | .....                | .....      | .....                         |
| T9102               | .....      | .....      | .....      | .....      | .....      | .....                | .....      | .....                         |
| K1                  | .....      | .....      | .....      | .....      | .....      | .....                | .....      | .....                         |
| Dd2                 | .....      | .....      | .....      | .....      | .....      | .....                | .....      | .....                         |
| D10                 | .....      | .....      | .....      | .....      | .....      | .....                | .....      | .....                         |
| FCC2                | .....      | .....      | .....      | .....      | .....      | .....                | .....      | .....                         |
| HB3                 | .....      | .....      | .....      | .....      | .....      | .....                | .....      | .....                         |
| 7G8                 | .....      | .....      | .....      | .....      | .....      | .....                | .....      | .....                         |
| <i>P.reichenowi</i> | .....      | .....      | .....      | .....      | .....      | ..... <b>G</b> ..... | .....      | ..... <b>C</b> ..... <b>G</b> |

|                     | 1850       | 1860                 | 1870      | 1880      | 1890       | 1900                   | 1910      | 1920       |
|---------------------|------------|----------------------|-----------|-----------|------------|------------------------|-----------|------------|
| PF13_0338           | CAGATAGCCA | AAATGTTGAT           | ATTTTGTAT | CCAAATTGA | TAATAATAAA | ACGATAGGTT             | TGTTTGTCC | TGTTAAAAGT |
| 3D7                 | .....      | .....                | .....     | .....     | .....      | .....                  | .....     | .....      |
| RO33                | .....      | .....                | .....     | .....     | .....      | .....                  | .....     | .....      |
| Palo Alto           | .....      | .....                | .....     | .....     | .....      | .....                  | .....     | .....      |
| FCR3                | .....      | .....                | .....     | .....     | .....      | .....                  | .....     | .....      |
| Wellcome            | .....      | .....                | .....     | .....     | .....      | .....                  | .....     | .....      |
| D6                  | .....      | .....                | .....     | .....     | .....      | .....                  | .....     | .....      |
| T996                | .....      | .....                | .....     | .....     | .....      | .....                  | .....     | .....      |
| T9102               | .....      | .....                | .....     | .....     | .....      | .....                  | .....     | .....      |
| K1                  | .....      | .....                | .....     | .....     | .....      | .....                  | .....     | .....      |
| Dd2                 | .....      | .....                | .....     | .....     | .....      | .....                  | .....     | .....      |
| D10                 | .....      | .....                | .....     | .....     | .....      | .....                  | .....     | .....      |
| FCC2                | .....      | .....                | .....     | .....     | .....      | .....                  | .....     | .....      |
| HB3                 | .....      | .....                | .....     | .....     | .....      | .....                  | .....     | .....      |
| 7G8                 | .....      | .....                | .....     | .....     | .....      | .....                  | .....     | .....      |
| <i>P.reichenowi</i> | .....      | ..... <b>A</b> ..... | .....     | .....     | .....      | ..... <b>.CC</b> ..... | .....     | .....      |

|                     | 1930       | 1940       | 1950                 | 1960      | 1970       | 1980       | 1990       | 2000      |
|---------------------|------------|------------|----------------------|-----------|------------|------------|------------|-----------|
| PF13_0338           | AGTTATGACG | GATTAAATTG | TTTGACAC             | GTTTATATA | AAAATAAGAC | ACTTGTCAAA | ATCGAATATT | TATTTGAGA |
| 3D7                 | .....      | .....      | .....                | .....     | .....      | .....      | .....      | .....     |
| RO33                | .....      | .....      | .....                | .....     | .....      | .....      | .....      | .....     |
| Palo Alto           | .....      | .....      | .....                | .....     | .....      | .....      | .....      | .....     |
| FCR3                | .....      | .....      | .....                | .....     | .....      | .....      | .....      | .....     |
| Wellcome            | .....      | .....      | .....                | .....     | .....      | .....      | .....      | .....     |
| D6                  | .....      | .....      | .....                | .....     | .....      | .....      | .....      | .....     |
| T996                | .....      | .....      | .....                | .....     | .....      | .....      | .....      | .....     |
| T9102               | .....      | .....      | .....                | .....     | .....      | .....      | .....      | .....     |
| K1                  | .....      | .....      | .....                | .....     | .....      | .....      | .....      | .....     |
| Dd2                 | .....      | .....      | .....                | .....     | .....      | .....      | .....      | .....     |
| D10                 | .....      | .....      | .....                | .....     | .....      | .....      | .....      | .....     |
| FCC2                | .....      | .....      | .....                | .....     | .....      | .....      | .....      | .....     |
| HB3                 | .....      | .....      | .....                | .....     | .....      | .....      | .....      | .....     |
| 7G8                 | .....      | .....      | .....                | .....     | .....      | .....      | .....      | .....     |
| <i>P.reichenowi</i> | .....      | .....      | ..... <b>T</b> ..... | .....     | .....      | .....      | .....      | .....     |

|                     | 2010       | 2020      | 2030       | 2040      | 2050                 | 2060       | 2070       | 2080                 |
|---------------------|------------|-----------|------------|-----------|----------------------|------------|------------|----------------------|
| PF13_0338           | AAATGATATC | TTTGTGTTC | CTCAAAGGAG | AATATATAA | ACTGAAGGTA           | CAGCTATGGA | AAGTCTTTTA | TATTTAATA            |
| 3D7                 | .....      | .....     | .....      | .....     | .....                | .....      | .....      | .....                |
| RO33                | .....      | .....     | .....      | .....     | .....                | .....      | .....      | .....                |
| Palo Alto           | .....      | .....     | .....      | .....     | .....                | .....      | .....      | .....                |
| FCR3                | .....      | .....     | .....      | .....     | .....                | .....      | .....      | .....                |
| Wellcome            | .....      | .....     | .....      | .....     | .....                | .....      | .....      | .....                |
| D6                  | .....      | .....     | .....      | .....     | .....                | .....      | .....      | .....                |
| T996                | .....      | .....     | .....      | .....     | .....                | .....      | .....      | .....                |
| T9102               | .....      | .....     | .....      | .....     | .....                | .....      | .....      | .....                |
| K1                  | .....      | .....     | .....      | .....     | .....                | .....      | .....      | .....                |
| Dd2                 | .....      | .....     | .....      | .....     | .....                | .....      | .....      | .....                |
| D10                 | .....      | .....     | .....      | .....     | .....                | .....      | .....      | .....                |
| FCC2                | .....      | .....     | .....      | .....     | .....                | .....      | .....      | .....                |
| HB3                 | .....      | .....     | .....      | .....     | .....                | .....      | .....      | .....                |
| 7G8                 | .....      | .....     | .....      | .....     | .....                | .....      | .....      | .....                |
| <i>P.reichenowi</i> | .....      | .....     | .....      | .....     | ..... <b>A</b> ..... | .....      | .....      | ..... <b>G</b> ..... |

|                     | 2090                 | 2100                 | 2110                 | 2120                 | 2130       | 2140       | 2150       | 2160       |
|---------------------|----------------------|----------------------|----------------------|----------------------|------------|------------|------------|------------|
| PF13_0338           | ATAACAATGT           | AAAAAATTA            | ATAGATGATA           | AAAGTATAAT           | ACATTTCTAT | TGTGAATGTA | ATGTTAATAA | TAATGTAATC |
| 3D7                 | .....                | .....                | .....                | .....                | .....      | .....      | .....      | .....      |
| RO33                | .....                | .....                | .....                | .....                | .....      | .....      | .....      | .....      |
| Palo Alto           | .....                | .....                | .....                | .....                | .....      | .....      | .....      | .....      |
| FCR3                | .....                | .....                | .....                | .....                | .....      | .....      | .....      | .....      |
| Wellcome            | .....                | .....                | .....                | .....                | .....      | .....      | .....      | .....      |
| D6                  | .....                | .....                | .....                | .....                | .....      | .....      | .....      | .....      |
| T996                | .....                | .....                | .....                | .....                | .....      | .....      | .....      | .....      |
| T9102               | .....                | .....                | .....                | .....                | .....      | .....      | .....      | .....      |
| K1                  | .....                | .....                | .....                | .....                | .....      | .....      | .....      | .....      |
| Dd2                 | .....                | .....                | .....                | .....                | .....      | .....      | .....      | .....      |
| D10                 | .....                | .....                | .....                | .....                | .....      | .....      | .....      | .....      |
| FCC2                | .....                | .....                | .....                | .....                | .....      | .....      | .....      | .....      |
| HB3                 | .....                | .....                | .....                | .....                | .....      | .....      | .....      | .....      |
| 7G8                 | .....                | .....                | .....                | .....                | .....      | .....      | .....      | .....      |
| <i>P.reichenowi</i> | ..... <b>C</b> ..... | ..... <b>G</b> ..... | ..... <b>A</b> ..... | ..... <b>C</b> ..... | .....      | .....      | .....      | .....      |

|                     | 2170      | 2180       | 2190       | 2200       | 2210       | 2220       | 2230       | 2240       |
|---------------------|-----------|------------|------------|------------|------------|------------|------------|------------|
| PF13_0338           | AAAGTTAAT | ATTATATATC | TCCATTTTAT | GATGAAAATA | GTATAAAACA | AGAAATCAAC | AAAAAAGACC | AAGAAATAAC |
| 3D7                 | .....     | .....      | .....      | .....      | .....      | .....      | .....      | .....      |
| RO33                | .....     | .....      | .....      | .....      | .....      | .....      | .....      | .....C     |
| Palo Alto           | .....     | .....      | .....      | .....      | .....      | .....      | .....      | .....C     |
| FCR3                | .....     | .....      | .....      | .....      | .....      | .....      | .....      | .....C     |
| Wellcome            | .....     | .....      | .....      | .....      | .....      | .....      | .....      | .....C     |
| D6                  | .....     | .....      | .....      | .....      | .....      | .....      | .....      | .....C     |
| T996                | .....     | .....      | .....      | .....      | .....      | .....      | .....      | .....C     |
| T9102               | .....     | .....      | .....      | .....      | .....      | .....      | .....      | .....C     |
| K1                  | .....     | .....      | .....      | .....      | .....      | .....      | .....      | .....C     |
| Dd2                 | .....     | .....      | .....      | .....      | .....      | .....      | .....      | .....C     |
| D10                 | .....     | .....      | .....      | .....      | .....      | .....      | .....      | .....C     |
| FCC2                | .....     | .....      | .....      | .....      | .....      | .....      | .....      | .....C     |
| HB3                 | .....     | .....      | .....      | .....      | .....      | .....      | .....      | .....C     |
| 7G8                 | .....     | .....      | .....      | .....      | .....      | .....      | .....      | .....C     |
| <i>P.reichenowi</i> | .....     | .....      | .....      | .....      | .....A     | .....A.G   | .....      | .....C     |

|                     | 2250       | 2260        | 2270       | 2280       | 2290       | 2300      | 2310       | 2320       |
|---------------------|------------|-------------|------------|------------|------------|-----------|------------|------------|
| PF13_0338           | TATGATTAAT | AAAACATATAC | CACAAGATGA | AAAAGATATT | CTATTCAATA | ATGAAAAGT | TGTTCCCTTA | TCAAACGAAC |
| 3D7                 | .....      | .....       | .....      | .....      | .....      | .....     | .....      | .....      |
| RO33                | .....      | .....       | .....      | .....      | .....      | .....     | .....      | .....      |
| Palo Alto           | .....      | .....       | .....      | .....      | .....      | .....     | .....      | .....      |
| FCR3                | .....      | .....       | .....      | .....      | .....      | .....     | .....      | .....      |
| Wellcome            | .....      | .....       | .....      | .....      | .....      | .....     | .....      | .....      |
| D6                  | .....      | .....       | .....      | .....      | .....      | .....     | .....      | .....      |
| T996                | .....      | .....       | .....      | .....      | .....      | .....     | .....      | .....      |
| T9102               | .....      | .....       | .....      | .....      | .....      | .....     | .....      | .....      |
| K1                  | .....      | .....       | .....      | .....      | .....      | .....     | .....      | .....      |
| Dd2                 | .....      | .....       | .....      | .....      | .....      | .....     | .....      | .....      |
| D10                 | .....      | .....       | .....      | .....      | .....      | .....     | .....      | .....      |
| FCC2                | .....      | .....       | .....      | .....      | .....      | .....     | .....      | .....      |
| HB3                 | .....      | .....       | .....      | .....      | .....      | .....     | .....      | .....      |
| 7G8                 | .....      | .....       | .....      | .....      | .....      | .....     | .....      | .....      |
| <i>P.reichenowi</i> | .....T     | .....       | .....A     | .....      | .....      | .....     | .....      | .....      |

|                     | 2330       | 2340       | 2350       | 2360     | 2370       | 2380      | 2390       | 2400       |
|---------------------|------------|------------|------------|----------|------------|-----------|------------|------------|
| PF13_0338           | CTCAAGAAAT | TATTCAACCA | CCTATTCAGG | AAAATTAA | TACTACTGAT | CCTTCAAAG | CATATATATA | TGGAGCTAAT |
| 3D7                 | .....      | .....      | .....      | .....    | .....      | .....     | .....      | .....      |
| RO33                | .....      | .....      | .....      | .....    | .....      | .....     | .....      | .....      |
| Palo Alto           | .....      | .....      | .....      | .....    | .....      | .....     | .....      | .....      |
| FCR3                | .....      | .....      | .....      | .....    | .....      | .....     | .....      | .....      |
| Wellcome            | .....      | .....      | .....      | .....    | .....      | .....     | .....      | .....      |
| D6                  | .....      | .....      | .....      | .....    | .....      | .....     | .....      | .....      |
| T996                | .....      | .....      | .....      | .....    | .....      | .....     | .....      | .....      |
| T9102               | .....      | .....      | .....      | .....    | .....      | .....     | .....      | .....      |
| K1                  | .....      | .....      | .....      | .....    | .....      | .....     | .....      | .....      |
| Dd2                 | .....      | .....      | .....      | .....    | .....      | .....     | .....      | .....      |
| D10                 | .....      | .....      | .....      | .....    | .....      | .....     | .....      | .....      |
| FCC2                | .....      | .....      | .....      | .....    | .....      | .....     | .....      | .....      |
| HB3                 | .....      | .....      | .....      | .....    | .....      | .....     | .....      | .....      |
| 7G8                 | .....      | .....      | .....      | .....    | .....      | .....     | .....      | .....      |
| <i>P.reichenowi</i> | .....      | .....      | .....A     | .....    | .....      | .....     | .....      | .....      |

|                     | 2410       | 2420       | 2430       | 2440      | 2450       |         |
|---------------------|------------|------------|------------|-----------|------------|---------|
| PF13_0338           | ATTATATTTA | TTGCAATTAT | ATCTATAATA | TCCTTGCTA | TTTCTTCTTT | CATATAA |
| 3D7                 | .....      | .....      | .....      | .....     | .....      | .....   |
| RO33                | .....      | .....      | .....      | .....     | .....      | .....   |
| Palo Alto           | .....      | .....      | .....      | .....     | .....      | .....   |
| FCR3                | .....      | .....      | .....      | .....     | .....      | .....   |
| Wellcome            | .....      | .....      | .....      | .....     | .....      | .....   |
| D6                  | .....      | .....      | .....      | .....     | .....      | .....   |
| T996                | .....      | .....      | .....      | .....     | .....      | .....   |
| T9102               | .....      | .....      | .....      | .....     | .....      | .....   |
| K1                  | .....      | .....      | .....      | .....     | .....      | .....   |
| Dd2                 | .....      | .....      | .....      | .....     | .....      | .....   |
| D10                 | .....      | .....      | .....      | .....     | .....      | .....   |
| FCC2                | .....      | .....      | .....      | .....     | .....      | .....   |
| HB3                 | .....      | .....      | .....      | .....     | .....      | .....   |
| 7G8                 | .....      | .....      | .....      | .....     | .....      | .....   |
| <i>P.reichenowi</i> | .....      | .....      | .....G     | .....G    | .....      | .....   |

**PFE0395c**

```
          10          20          30          40          50          60          70          80
PFE0395c  ....|....| ....|....| ....|....| ....|....| ....|....| ....|....|
3D7       ATGAAACGCT GGTC AATCAT TACAAGAAATC GTTATAATAT TCTGCATATT AACATGTAAA GGTC AAGTAG AAAACAAAA
RO33      .....
Palo Alto .....
FCR3      .....
Wellcome  .....
D6        .....
T996     .....
T9102    .....
K1        .....
Dd2      .....
D10      .....
FCC2     .....
HB3      .....
7G8      .....
P.reichenowi .....

```

```
          90          100         110         120         130         140         150         160
PFE0395c  ....|....| ....|....| ....|....| ....|....| ....|....| ....|....|
3D7       GGTTGATTTT CGAACAGAAA AAGGAAAGTT CGTGCCCTTA AATCTAGTAC CAGGAGATGT TGTAGAATAT TCGTGCCGT
RO33      .....
Palo Alto .....
FCR3      .....
Wellcome  .....
D6        .....
T996     .....
T9102    .....
K1        .....
Dd2      .....
D10      .....
FCC2     .....
HB3      .....
7G8      .....
P.reichenowi ..G..... ..A..... T..... ..A..... A.....

```

```
          170         180         190         200         210         220         230         240
PFE0395c  ....|....| ....|....| ....|....| ....|....| ....|....| ....|....|
3D7       ATAGTTTAAA TAATGATATC CGAAATATGA ATGGGGTTGA ACGAGAACAT TTCGACAATA AAAAATTTTG TTTGATTAT
RO33      .....
Palo Alto .....
FCR3      .....
Wellcome  .....
D6        .....
T996     .....
T9102    .....
K1        .....
Dd2      .....
D10      .....
FCC2     .....
HB3      .....
7G8      .....
P.reichenowi ..... ..G..... C.....

```

```
          250         260         270         280         290         300         310         320
PFE0395c  ....|....| ....|....| ....|....| ....|....| ....|....| ....|....|
3D7       ATATTTGTTG GAAGTAAGTT AACATTTTAA AAAGAATATG TTCGTGGTTC TTATAATGTG GTACATAAAG AAGAAGGGAA
RO33      .....
Palo Alto .....
FCR3      .....
Wellcome  .....
D6        .....
T996     .....
T9102    .....
K1        .....
Dd2      .....
D10      .....
FCC2     .....
HB3      .....
7G8      .....
P.reichenowi ..... ..A..... ..A..... A.....

```













|                     | 810        | 820        | 830        | 840        | 850        | 860        | 870        | 880        |
|---------------------|------------|------------|------------|------------|------------|------------|------------|------------|
| PF14_0201           | AGATAATGAA | AGTGATGATG | ATGTTAATAA | TAATAATAAT | AATAATAATG | ATGATCAAGA | TGAACAAGGT | AAATGATGGT |
| 3D7                 | .....      | .....      | .....      | .....      | .....      | .....      | .....      | .....      |
| RO33                | .....      | .....      | .....      | .....      | .....      | .....      | .....      | .....      |
| Palo Alto           | .....      | .....      | .....      | .....      | .....      | .....      | .....      | .....      |
| FCR3                | .....      | .....      | .....      | .....      | .....      | .....      | .....      | .....      |
| Wellcome            | .....      | .....      | .....      | .....      | .....      | .....      | .....      | .....      |
| D6                  | .....      | .....      | .....      | .....      | .....      | .....      | .....      | .....      |
| T996                | .....      | .....      | .....      | .....      | .....      | .....      | .....      | .....      |
| T9102               | .....      | .....      | .....      | .....      | .....      | .....      | .....      | .....      |
| K1                  | .....      | .....      | .....      | .....      | .....      | .....      | .....      | .....      |
| Dd2                 | .....      | .....      | .....      | .....      | .....      | .....      | .....      | .....      |
| D10                 | .....      | .....      | .....      | .....      | .....      | .....      | .....      | .....      |
| FCC2                | .....      | .....      | .....      | .....      | .....      | .....      | .....      | .....      |
| HB3                 | .....      | .....      | .....      | .....      | .....      | .....      | .....      | .....      |
| 7G8                 | .....      | .....      | .....      | .....      | .....      | .....      | .....      | .....      |
| <i>P.reichenowi</i> | .....      | .....      | .....      | .....      | .....      | .....      | .....      | .....      |

|                     | 890        | 900        | 910        | 920        | 930       | 940        | 950        | 960        |
|---------------------|------------|------------|------------|------------|-----------|------------|------------|------------|
| PF14_0201           | AT--GTTAC  | CTCTTCTATG | AATAAAAATG | AAGATAACAA | AGATTAGAA | CATGGCTCTT | CAAATGATGT | TAATAATAAT |
| 3D7                 | .....      | .....      | .....      | .....      | .....     | .....      | .....      | .....      |
| RO33                | .....      | .....      | .....      | .....      | .....     | .....      | .....      | .....      |
| Palo Alto           | .....      | .....      | .....      | .....      | .....     | .....      | .....      | .....      |
| FCR3                | .....      | .....      | .....      | .....      | .....     | .....      | .....      | .....      |
| Wellcome            | .....      | .....      | .....      | .....      | .....     | .....      | .....      | .....      |
| D6                  | .....      | .....      | .....      | .....      | .....     | .....      | .....      | .....      |
| T996                | .....      | .....      | .....      | .....      | .....     | .....      | .....      | .....      |
| T9102               | .....      | .....      | .....      | .....      | .....     | .....      | .....      | .....      |
| K1                  | .....      | .....      | .....      | .....      | .....     | .....      | .....      | .....      |
| Dd2                 | .....      | .....      | .....      | .....      | .....     | .....      | .....      | .....      |
| D10                 | .....      | .....      | .....      | .....      | .....     | .....      | .....      | .....      |
| FCC2                | .....      | .....      | .....      | .....      | .....     | .....      | .....      | .....      |
| HB3                 | .....      | .....      | .....      | .....      | .....     | .....      | .....      | .....      |
| 7G8                 | .....      | .....      | .....      | .....      | .....     | .....      | .....      | .....      |
| <i>P.reichenowi</i> | .GTTA..... | .....      | .....      | .....      | .....     | .....      | .....      | .....      |

|                     | 970        | 980        | 990        | 1000      | 1010       | 1020       | 1030       | 1040       |
|---------------------|------------|------------|------------|-----------|------------|------------|------------|------------|
| PF14_0201           | ACAGACACTC | TTGTTAATAA | TAAAGAAAAT | AAAGAATTG | TATTAAAAGA | AAAATCAAGT | TTAACATCTA | AAATTAATAA |
| 3D7                 | .....      | .....      | .....      | .....     | .....      | .....      | .....      | .....      |
| RO33                | .....      | .....      | .....      | .....     | .....      | .....      | .....      | .....      |
| Palo Alto           | .....      | .....      | .....      | .....     | .....      | .....      | .....      | .....      |
| FCR3                | .....      | .....      | .....      | .....     | .....      | .....      | .....      | .....      |
| Wellcome            | .....      | .....      | .....      | .....     | .....      | .....      | .....      | .....      |
| D6                  | .....      | .....      | .....      | .....     | .....      | .....      | .....      | .....      |
| T996                | .....      | .....      | .....      | .....     | .....      | .....      | .....      | .....      |
| T9102               | .....      | .....      | .....      | .....     | .....      | .....      | .....      | .....      |
| K1                  | .....      | .....      | .....      | .....     | .....      | .....      | .....      | .....      |
| Dd2                 | .....      | .....      | .....      | .....     | .....      | .....      | .....      | .....      |
| D10                 | .....      | .....      | .....      | .....     | .....      | .....      | .....      | .....      |
| FCC2                | .....      | .....      | .....      | .....     | .....      | .....      | .....      | .....      |
| HB3                 | .....      | .....      | .....      | .....     | .....      | .....      | .....      | .....      |
| 7G8                 | .....      | .....      | .....      | .....     | .....      | .....      | .....      | .....      |
| <i>P.reichenowi</i> | .....      | .....      | .....      | .....     | .....      | .....      | .....      | .....      |

|                     | 1050       | 1060       | 1070       | 1080       | 1090       | 1100       | 1110       | 1120       |
|---------------------|------------|------------|------------|------------|------------|------------|------------|------------|
| PF14_0201           | AGAATTAGCA | CATAGAACCG | CTCTTTTTAA | TAAATTAGCT | GATAATATAT | CCTTATTATT | GAATAAAAAA | TATGATTCCT |
| 3D7                 | .....      | .....      | .....      | .....      | .....      | .....      | .....      | .....      |
| RO33                | .....      | .....      | .....      | .....      | .....      | .....      | .....      | .....      |
| Palo Alto           | .....      | .....      | .....      | .....      | .....      | .....      | .....      | .....      |
| FCR3                | .....      | .....      | .....      | .....      | .....      | .....      | .....      | .....      |
| Wellcome            | .....      | .....      | .....      | .....      | .....      | .....      | .....      | .....      |
| D6                  | .....      | .....      | .....      | .....      | .....      | .....      | .....      | .....      |
| T996                | .....      | .....      | .....      | .....      | .....      | .....      | .....      | .....      |
| T9102               | .....      | .....      | .....      | .....      | .....      | .....      | .....      | .....      |
| K1                  | .....      | .....      | .....      | .....      | .....      | .....      | .....      | .....      |
| Dd2                 | .....      | .....      | .....      | .....      | .....      | .....      | .....      | .....      |
| D10                 | .....      | .....      | .....      | .....      | .....      | .....      | .....      | .....      |
| FCC2                | .....      | .....      | .....      | .....      | .....      | .....      | .....      | .....      |
| HB3                 | .....      | .....      | .....      | .....      | .....      | .....      | .....      | .....      |
| 7G8                 | .....      | .....      | .....      | .....      | .....      | .....      | .....      | .....      |
| <i>P.reichenowi</i> | .....      | .....      | .....      | .....      | .....      | .A.....    | .....      | .....G     |



|                     | 1450      | 1460      | 1470       | 1480       | 1490       | 1500       | 1510       | 1520       |
|---------------------|-----------|-----------|------------|------------|------------|------------|------------|------------|
| PF14_0201           | ATATCACTG | ATATATCTT | TAAATATAAT | CCAAGTGAAA | ATATTATGGA | TCATCAGGAA | ATGGTAAAAA | AGGGTTCTAT |
| 3D7                 | .....     | .....     | .....      | .....      | .....      | .....      | .....      | .....      |
| RO33                | .....     | .....     | .....      | .....      | .....      | .....      | .....      | .....      |
| Palo Alto           | .....     | .....     | .....      | .....      | .....      | .....      | .....      | .....      |
| FCR3                | .....     | .....     | .....      | .....      | .....      | .....      | .....      | .....      |
| Wellcome            | .....     | .....     | .....      | .....      | .....      | .....      | .....      | .....      |
| D6                  | .....     | .....     | .....      | .....      | .....      | .....      | .....      | .....      |
| T996                | .....     | .....     | .....      | .....      | .....      | .....      | .....      | .....      |
| T9102               | .....     | .....     | .....      | .....      | .....      | .....      | .....      | .....      |
| K1                  | .....     | .....     | .....      | .....      | .....      | .....      | .....      | .....      |
| Dd2                 | .....     | .....     | .....      | .....      | .....A     | .....      | .....      | .....      |
| D10                 | .....     | .....     | .....      | .....      | .....      | .....      | .....      | .....      |
| FCC2                | .....     | .....     | .....      | .....      | .....      | .....      | .....      | .....      |
| HB3                 | .....     | .....     | .....      | .....      | .....      | .....      | .....      | .....      |
| 7G8                 | .....     | .....     | .....      | .....      | .....      | .....      | .....      | .....      |
| <i>P.reichenowi</i> | .....C    | .....T    | .....T     | .....G     | .....A     | .....G     | .....      | .....T     |

|                     | 1530       | 1540       | 1550       | 1560       | 1570       | 1580       | 1590       | 1600       |
|---------------------|------------|------------|------------|------------|------------|------------|------------|------------|
| PF14_0201           | AACGGAAGAC | GAATTAAGAA | TTGTTAATGA | CCTTGAACCA | TTAGATAAAT | ATAGAAGAAG | AAAAAGAATT | ACAGAATTAA |
| 3D7                 | .....      | .....      | .....      | .....      | .....      | .....      | .....      | .....      |
| RO33                | .....      | .....      | .....      | .....      | .....      | .....      | .....      | .....      |
| Palo Alto           | .....      | .....      | .....      | .....      | .....      | .....      | .....      | .....      |
| FCR3                | .....      | .....      | .....      | .....      | .....      | .....      | .....      | .....      |
| Wellcome            | .....      | .....      | .....      | .....      | .....      | .....      | .....      | .....      |
| D6                  | .....      | .....      | .....      | .....      | .....      | .....      | .....      | .....      |
| T996                | .....      | .....      | .....      | .....      | .....      | .....      | .....      | .....      |
| T9102               | .....      | .....      | .....      | .....      | .....      | .....      | .....      | .....      |
| K1                  | .....      | .....      | .....      | .....      | .....      | .....      | .....      | .....      |
| Dd2                 | .....      | .....      | .....      | .....      | .....      | .....      | .....      | .....      |
| D10                 | .....      | .....      | .....      | .....      | .....      | .....      | .....      | .....      |
| FCC2                | .....      | .....      | .....      | .....      | .....      | .....      | .....      | .....      |
| HB3                 | .....      | .....      | .....      | .....      | .....      | .....      | .....      | .....      |
| 7G8                 | .....      | .....      | .....      | .....      | .....      | .....      | .....      | .....      |
| <i>P.reichenowi</i> | .....T     | .....      | .....      | .....      | .....      | .....      | .....      | .....      |

|                     | 1610      | 1620      | 1630       | 1640       | 1650       | 1660       | 1670       | 1680      |
|---------------------|-----------|-----------|------------|------------|------------|------------|------------|-----------|
| PF14_0201           | GAAAAATCT | TGTTGAAAA | TAAAGAATCT | TATATTTAGA | AAAGAATAAC | TTATTTAATA | CACAAGCTAG | TTGTATCAA |
| 3D7                 | .....     | .....     | .....      | .....      | .....      | .....      | .....      | .....     |
| RO33                | .....     | .....     | .....      | .....      | .....      | .....      | .....      | .....     |
| Palo Alto           | .....     | .....     | .....      | .....      | .....      | .....      | .....      | .....     |
| FCR3                | .....     | .....     | .....      | .....      | .....      | .....      | .....      | .....     |
| Wellcome            | .....     | .....     | .....      | .....      | .....      | .....      | .....      | .....     |
| D6                  | .....     | .....     | .....      | .....      | .....      | .....      | .....      | .....     |
| T996                | .....     | .....     | .....      | .....      | .....      | .....      | .....      | .....     |
| T9102               | .....     | .....     | .....      | .....      | .....      | .....      | .....      | .....     |
| K1                  | .....     | .....     | .....      | .....      | .....      | .....      | .....      | .....     |
| Dd2                 | .....     | .....     | .....      | .....      | .....      | .....      | .....      | .....     |
| D10                 | .....     | .....     | .....      | .....      | .....      | .....      | .....      | .....     |
| FCC2                | .....     | .....     | .....      | .....      | .....      | .....      | .....      | .....     |
| HB3                 | .....     | .....     | .....      | .....      | .....      | .....      | .....      | .....     |
| 7G8                 | .....     | .....     | .....      | .....      | .....      | .....      | .....      | .....     |
| <i>P.reichenowi</i> | .....G    | .....     | .....T     | .....      | .....      | .....      | .....      | .....     |

|                     | 1690       | 1700      | 1710       | 1720       | 1730       | 1740       | 1750       | 1760       |
|---------------------|------------|-----------|------------|------------|------------|------------|------------|------------|
| PF14_0201           | TCGTATTGTT | ACAAGAACC | ATTGAATCTA | AAAACACTAG | AAGTATTATT | AAAGAAAAAT | TATTATAGAT | TAAAAGAAAA |
| 3D7                 | .....      | .....     | .....      | .....      | .....      | .....      | .....      | .....      |
| RO33                | .....      | .....     | .....      | .....      | .....      | .....      | .....      | .....      |
| Palo Alto           | .....      | .....     | .....      | .....      | .....      | .....      | .....      | .....      |
| FCR3                | .....      | .....     | .....      | .....      | .....      | .....      | .....      | .....      |
| Wellcome            | .....      | .....     | .....      | .....      | .....      | .....      | .....      | .....      |
| D6                  | .....      | .....     | .....      | .....      | .....      | .....      | .....      | .....      |
| T996                | .....      | .....     | .....      | .....      | .....      | .....      | .....      | .....      |
| T9102               | .....      | .....     | .....      | .....      | .....      | .....      | .....      | .....      |
| K1                  | .....      | .....     | .....      | .....      | .....      | .....      | .....      | .....      |
| Dd2                 | .....      | .....     | .....      | .....      | .....      | .....      | .....      | .....      |
| D10                 | .....      | .....     | .....      | .....      | .....      | .....      | .....      | .....      |
| FCC2                | .....      | .....     | .....      | .....      | .....      | .....      | .....      | .....      |
| HB3                 | .....      | .....     | .....      | .....      | .....      | .....      | .....      | .....      |
| 7G8                 | .....      | .....     | .....      | .....      | .....      | .....      | .....      | .....      |
| <i>P.reichenowi</i> | .....      | .....A    | .....      | .....G     | .....      | .....      | .....      | .....      |



|                     | 2090      | 2100            | 2110        | 2120       | 2130      | 2140        | 2150       | 2160        |
|---------------------|-----------|-----------------|-------------|------------|-----------|-------------|------------|-------------|
| PF14_0201           | ATATTTTGA | TAGTAATAAC      | ---ACTGATC  | AAAATAATGA | ACAAGAACA | CCAAAACAAG  | ACGATCAATT | ACTAAATAAT  |
| 3D7                 | .....     | .....           | .....       | .....      | .....     | .....       | .....      | .....       |
| RO33                | .....     | .....           | .....       | .....      | .....     | .....       | .....      | .....       |
| Palo Alto           | .....     | .....           | .....       | .....      | .....     | .....       | .....      | .....       |
| FCR3                | .....     | .....           | .....       | .....      | .....     | .....       | .....      | .....       |
| Wellcome            | .....     | .....           | .....       | .....      | .....     | .....       | .....      | .....       |
| D6                  | .....     | .....           | .....       | .....      | .....     | .....       | .....      | .....       |
| T996                | .....     | .....           | .....       | .....      | .....     | .....       | .....      | .....       |
| T9102               | .....     | .....           | .....       | .....      | .....     | .....       | .....      | .....       |
| K1                  | .....     | .....           | .....       | .....      | .....     | .....       | .....      | .....       |
| Dd2                 | .....     | .....           | .....       | .....      | .....     | .....       | .....      | .....       |
| D10                 | .....     | .....           | .....       | .....      | .....     | .....       | .....      | .....       |
| FCC2                | .....     | .....           | .....       | .....      | .....     | .....       | .....      | .....       |
| HB3                 | .....     | .....           | .....       | .....      | .....     | .....       | .....      | .....       |
| 7G8                 | .....     | .....           | .....       | .....      | .....     | .....       | .....      | .....       |
| <i>P.reichenowi</i> | .....     | .....T AAC..... | .....T..... | .....      | .....     | .....C..... | .....A.C.  | .....G..... |

|                     | 2170       | 2180        | 2190       | 2200       | 2210        | 2220       | 2230       | 2240        |
|---------------------|------------|-------------|------------|------------|-------------|------------|------------|-------------|
| PF14_0201           | AATAATGATG | ATGTCCTATC  | AGAATCCAAT | AACGAAAATA | AAGAGAAAAC  | AAGCGACGAT | GCAACTCACA | AAGAGACACA  |
| 3D7                 | .....      | .....       | .....      | .....      | .....       | .....      | .....      | .....       |
| RO33                | .....      | .....       | .....      | .....      | .....       | .....      | .....      | .....       |
| Palo Alto           | .....      | .....       | .....      | .....      | .....       | .....      | .....      | .....       |
| FCR3                | .....      | .....       | .....      | .....      | .....       | .....      | .....      | .....       |
| Wellcome            | .....      | .....       | .....      | .....      | .....       | .....      | .....      | .....       |
| D6                  | .....      | .....       | .....      | .....      | .....       | .....      | .....      | .....       |
| T996                | .....      | .....       | .....      | .....      | .....       | .....      | .....      | .....       |
| T9102               | .....      | .....       | .....      | .....      | .....       | .....      | .....      | .....       |
| K1                  | .....      | .....       | .....      | .....      | .....       | .....      | .....      | .....       |
| Dd2                 | .....      | .....       | .....      | .....      | .....       | .....      | .....      | .....       |
| D10                 | .....      | .....       | .....      | .....      | .....       | .....      | .....      | .....       |
| FCC2                | .....      | .....       | .....      | .....      | .....       | .....      | .....      | .....       |
| HB3                 | .....      | .....       | .....      | .....      | .....       | .....      | .....      | .....       |
| 7G8                 | .....      | .....       | .....      | .....      | .....       | .....      | .....      | .....       |
| <i>P.reichenowi</i> | .....      | .....G..... | .....      | .....      | .....T..... | .....      | .....      | .....G..... |

|                     | 2250       | 2260       | 2270        | 2280       | 2290       | 2300               | 2310       | 2320        |
|---------------------|------------|------------|-------------|------------|------------|--------------------|------------|-------------|
| PF14_0201           | AGAAAAATCA | GATCAAGAAC | CITCACAAA   | TATTCAAGAA | GATAATAGTG | ATGAAAAA--         | -CATGCAGAA | AATGAGGAAA  |
| 3D7                 | .....      | .....      | .....       | .....      | .....      | .....              | .....      | .....       |
| RO33                | .....      | .....      | .....       | .....      | .....      | .....              | .....      | .....       |
| Palo Alto           | .....      | .....      | .....       | .....      | .....      | .....              | .....      | .....       |
| FCR3                | .....      | .....      | .....       | .....      | .....      | .....              | .....      | .....       |
| Wellcome            | .....      | .....      | .....       | .....      | .....      | .....              | .....      | .....       |
| D6                  | .....      | .....      | .....       | .....      | .....      | .....              | .....      | .....       |
| T996                | .....      | .....      | .....       | .....      | .....      | .....              | .....      | .....       |
| T9102               | .....      | .....      | .....       | .....      | .....      | .....              | .....      | .....       |
| K1                  | .....      | .....      | .....       | .....      | .....      | .....              | .....      | .....       |
| Dd2                 | .....      | .....      | .....       | .....      | .....      | .....              | .....      | .....       |
| D10                 | .....      | .....      | .....       | .....      | .....      | .....              | .....      | .....       |
| FCC2                | .....      | .....      | .....       | .....      | .....      | .....              | .....      | .....       |
| HB3                 | .....      | .....      | .....       | .....      | .....      | .....              | .....      | .....       |
| 7G8                 | .....      | .....      | .....       | .....      | .....      | .....              | .....      | .....       |
| <i>P.reichenowi</i> | .....      | .....      | .....G..... | .....      | .....      | .....AA A..CA..... | .....      | .....C..... |

|                     | 2330        | 2340       | 2350        | 2360       | 2370       | 2380       | 2390       | 2400      |
|---------------------|-------------|------------|-------------|------------|------------|------------|------------|-----------|
| PF14_0201           | ATGTAGAACA  | AATTGAAACA | GACAGTAACG  | TTTCTGAAGA | AGCTAATGAC | GAAAAATAAG | ACAATATGCA | AACAACAAC |
| 3D7                 | .....       | .....      | .....       | .....      | .....      | .....      | .....      | .....     |
| RO33                | .....       | .....      | .....       | .....      | .....      | .....      | .....      | .....     |
| Palo Alto           | .....       | .....      | .....       | .....      | .....      | .....      | .....      | .....     |
| FCR3                | .....       | .....      | .....       | .....      | .....      | .....      | .....      | .....     |
| Wellcome            | .....       | .....      | .....       | .....      | .....      | .....      | .....      | .....     |
| D6                  | .....       | .....      | .....       | .....      | .....      | .....      | .....      | .....     |
| T996                | .....       | .....      | .....       | .....      | .....      | .....      | .....      | .....     |
| T9102               | .....       | .....      | .....       | .....      | .....      | .....      | .....      | .....     |
| K1                  | .....       | .....      | .....       | .....      | .....      | .....      | .....      | .....     |
| Dd2                 | .....       | .....      | .....       | .....      | .....      | .....      | .....      | .....     |
| D10                 | .....       | .....      | .....       | .....      | .....      | .....      | .....      | .....     |
| FCC2                | .....       | .....      | .....       | .....      | .....      | .....      | .....      | .....     |
| HB3                 | .....       | .....      | .....       | .....      | .....      | .....      | .....      | .....     |
| 7G8                 | .....       | .....      | .....       | .....      | .....      | .....      | .....      | .....     |
| <i>P.reichenowi</i> | .....C..... | .....      | .....C..... | .....      | .....      | .....      | .....      | .....     |

|                     | 2410        | 2420      | 2430       | 2440       | 2450          | 2460      | 2470        | 2480       |
|---------------------|-------------|-----------|------------|------------|---------------|-----------|-------------|------------|
| PF14_0201           | GATGAAGGAA  | CTGAAGAAT | ACAACAAAAT | GATGAAGATG | CTGAATCTCT    | AACAAGGAA | AATTCAAAAT  | CGGAAGAACA |
| 3D7                 | .....       | .....     | .....      | .....      | .....         | .....     | .....       | .....      |
| RO33                | .....       | .....     | .....      | .....      | .....         | .....     | .....       | .....      |
| Palo Alto           | .....       | .....     | .....      | .....      | .....         | .....     | .....       | .....      |
| FCR3                | .....       | .....     | .....      | .....      | .....         | .....     | .....       | .....      |
| Wellcome            | .....       | .....     | .....      | .....      | .....         | .....     | .....       | .....      |
| D6                  | .....       | .....     | .....      | .....      | .....         | .....     | .....       | .....      |
| T996                | .....       | .....     | .....      | .....      | .....         | .....     | .....       | .....      |
| T9102               | .....       | .....     | .....      | .....      | .....         | .....     | .....       | .....      |
| K1                  | .....       | .....     | .....      | .....      | .....         | .....     | .....       | .....      |
| Dd2                 | .....       | .....     | .....      | .....      | .....         | .....     | .....       | .....      |
| D10                 | .....       | .....     | .....      | .....      | .....         | .....     | .....       | .....      |
| FCC2                | .....       | .....     | .....      | .....      | .....         | .....     | .....       | .....      |
| HB3                 | .....       | .....     | .....      | .....      | .....         | .....     | .....       | .....      |
| 7G8                 | .....       | .....     | .....      | .....      | .....         | .....     | .....       | .....      |
| <i>P.reichenowi</i> | .....G..... | .....     | .....      | .....      | .....G.A..... | .....     | .....T..... | .....      |

|                     | 2490       | 2500       | 2510       | 2520        | 2530       | 2540       | 2550        | 2560        |
|---------------------|------------|------------|------------|-------------|------------|------------|-------------|-------------|
| PF14_0201           | AGAAAATGAA | GATTCAACAG | ATGCTGAAGC | TATTGACAAA  | GAAGAAGTAG | AAACAGAAGA | AAAAGGAAA   | GATGAACAAA  |
| 3D7                 | .....      | .....      | .....      | .....       | .....      | .....      | .....       | .....       |
| RO33                | .....      | .....      | .....      | .....       | .....      | .....      | .....       | .....       |
| Palo Alto           | .....      | .....      | .....      | .....       | .....      | .....      | .....       | .....       |
| FCR3                | .....      | .....      | .....      | .....       | .....      | .....      | .....       | .....       |
| Wellcome            | .....      | .....      | .....      | .....       | .....      | .....      | .....       | .....       |
| D6                  | .....      | .....      | .....      | .....       | .....      | .....      | .....       | .....       |
| T996                | .....      | .....      | .....      | .....       | .....      | .....      | .....       | .....       |
| T9102               | .....      | .....      | .....      | .....       | .....      | .....      | .....       | .....       |
| K1                  | .....      | .....      | .....      | .....       | .....      | .....      | .....       | .....       |
| Dd2                 | .....      | .....      | .....      | .....       | .....      | .....      | .....       | .....       |
| D10                 | .....      | .....      | .....      | .....       | .....      | .....      | .....       | .....       |
| FCC2                | .....      | .....      | .....      | .....       | .....      | .....      | .....       | .....       |
| HB3                 | .....      | .....      | .....      | .....       | .....      | .....      | .....       | .....       |
| 7G8                 | .....      | .....      | .....      | .....       | .....      | .....      | .....       | .....       |
| <i>P.reichenowi</i> | .....      | .....      | .....      | .....G..... | .....      | .....      | .....A..... | .....A..... |

|                     | 2570          | 2580       | 2590        | 2600       | 2610        | 2620        | 2630        | 2640       |
|---------------------|---------------|------------|-------------|------------|-------------|-------------|-------------|------------|
| PF14_0201           | AA-----       | -AAAGACGAA | CAAAAAGAAC  | AAGATGAAGA | AGAAGATGGC  | GAAAAGAAA   | ATAACATAA   | ATCAAGTGAA |
| 3D7                 | -----         | -----      | -----       | -----      | -----       | -----       | -----       | -----      |
| RO33                | -----         | -----      | -----       | -----      | -----       | -----       | -----       | -----      |
| Palo Alto           | -----         | -----      | -----       | -----      | -----       | -----       | -----       | -----      |
| FCR3                | -----         | -----      | -----       | -----      | -----       | -----       | -----       | -----      |
| Wellcome            | -----         | -----      | -----       | -----      | -----       | -----       | -----       | -----      |
| D6                  | -----         | -----      | -----       | -----      | -----       | .....C..... | -----       | -----      |
| T996                | -----         | -----      | -----       | -----      | -----       | -----       | -----       | -----      |
| T9102               | -----         | -----      | -----       | -----      | -----       | -----       | -----       | -----      |
| K1                  | -----         | -----      | -----       | -----      | -----       | -----       | -----       | -----      |
| Dd2                 | -----         | -----      | .....A..... | -----      | -----       | -----       | -----       | -----      |
| D10                 | -----         | -----      | -----       | -----      | -----       | -----       | -----       | -----      |
| FCC2                | -----         | -----      | -----       | -----      | -----       | -----       | -----       | -----      |
| HB3                 | -----         | -----      | -----       | -----      | -----       | -----       | -----       | -----      |
| 7G8                 | -----         | -----      | -----       | -----      | .....A..... | -----       | .....G..... | -----      |
| <i>P.reichenowi</i> | .....GACGAACA | A.....     | -----       | -----      | .....A..... | -----       | .....G..... | -----      |

|                     | 2650       | 2660      | 2670          | 2680       | 2690       | 2700       | 2710        | 2720        |
|---------------------|------------|-----------|---------------|------------|------------|------------|-------------|-------------|
| PF14_0201           | ACAACCAACG | AAACAGTAA | TGACATTGAA    | GAAAATAAAA | ATGAAGTAAA | AGGTGAAGAA | CACCTACAAG  | GATCAGAACA  |
| 3D7                 | .....      | .....     | .....         | .....      | .....      | .....      | .....       | .....       |
| RO33                | .....      | .....     | .....         | .....      | .....      | .....      | .....       | .....       |
| Palo Alto           | .....      | .....     | .....         | .....      | .....      | .....      | .....G..... | .....       |
| FCR3                | .....      | .....     | .....         | .....      | .....      | .....      | .....       | .....       |
| Wellcome            | .....      | .....     | .....         | .....      | .....      | .....      | .....       | .....       |
| D6                  | .....      | .....     | .....         | .....      | .....      | .....      | .....       | .....       |
| T996                | .....      | .....     | .....         | .....      | .....      | .....      | .....       | .....       |
| T9102               | .....      | .....     | .....         | .....      | .....      | .....      | .....       | .....       |
| K1                  | .....      | .....     | .....         | .....      | .....      | .....      | .....       | .....       |
| Dd2                 | .....      | .....     | .....         | .....      | .....      | .....      | .....       | .....       |
| D10                 | .....      | .....     | .....         | .....      | .....      | .....      | .....       | .....       |
| FCC2                | .....      | .....     | .....         | .....      | .....      | .....      | .....       | .....       |
| HB3                 | .....      | .....     | .....         | .....      | .....      | .....      | .....       | .....       |
| 7G8                 | .....      | .....     | .....         | .....      | .....      | .....      | .....       | .....       |
| <i>P.reichenowi</i> | .....      | .....     | .....A.C..... | .....      | .....      | .....      | .....       | .....C..... |

|                     | 2730       | 2740       | 2750       | 2760      | 2770       | 2780       | 2790       | 2800       |
|---------------------|------------|------------|------------|-----------|------------|------------|------------|------------|
| PF14_0201           | ATCAATAGAA | GCATCTGAAT | CATCTCAAAA | AGATGAACT | AAAGAAACAG | AAGATAAAGA | AGAATATGTA | AATGCAAATG |
| 3D7                 | .....      | .....      | .....      | .....     | .....      | .....      | .....      | .....      |
| RO33                | .....      | .....      | .....      | .....     | .....      | .....      | .....      | .....      |
| Palo Alto           | .....      | .....      | .....      | .....     | .....      | .....      | .....      | .....      |
| FCR3                | .....      | .....      | .....      | .....     | .....      | .....      | .....      | .....      |
| Wellcome            | .....      | .....      | .....      | .....     | .....      | .....      | .....      | .....      |
| D6                  | .....      | .....      | .....      | .....     | .....      | .....      | .....      | .....      |
| T996                | .....      | .....      | .....      | .....     | .....      | .....      | .....      | .....      |
| T9102               | .....      | .....      | .....      | .....     | .....      | .....      | .....      | .....      |
| K1                  | .....      | .....      | .....      | .....     | .....      | .....      | .....      | .....      |
| Dd2                 | .....      | .....      | .....      | .....     | .....      | .....      | .....      | .....      |
| D10                 | .....      | .....      | .....      | .....     | .....      | .....      | .....      | .....      |
| FCC2                | .....      | .....      | .....      | .....     | .....      | .....      | .....      | .....      |
| HB3                 | .....      | .....      | .....      | .....     | .....      | .....      | .....      | .....      |
| 7G8                 | ...G...    | .....      | .....      | .....     | .....      | .....      | .....      | .....      |
| <i>P.reichenowi</i> | .G...C..   | .....T.    | ...C.....  | .....T.A. | .....      | .....      | .....      | .....      |

|                     | 2810       | 2820       | 2830       | 2840      | 2850      | 2860       | 2870       | 2880      |
|---------------------|------------|------------|------------|-----------|-----------|------------|------------|-----------|
| PF14_0201           | ATGATGAATC | TAGTGAAGAA | GATACGACTC | CAATGAAAC | AAACAAAAC | GATAATGGCA | GTTCATTITT | CTTGCTATG |
| 3D7                 | .....      | .....      | .....      | .....     | .....     | .....      | .....      | .....     |
| RO33                | .....      | .....      | .....      | .....     | .....     | .....      | .....      | .....     |
| Palo Alto           | .....      | .....      | .....      | .....     | .....     | .....      | .....      | .....     |
| FCR3                | .....      | .....      | .....      | .....     | .....     | .....      | .....      | .....     |
| Wellcome            | .....      | .....      | .....      | .....     | .....     | .....      | .....      | .....     |
| D6                  | .....      | .....      | .....      | .....     | .....     | .....      | .....      | .....     |
| T996                | .....      | .....      | .....      | .....     | .....     | .....      | .....      | .....     |
| T9102               | .....      | .....      | .....      | .....     | .....     | .....      | .....      | .....     |
| K1                  | .....      | .....      | .....      | .....     | .....     | .....      | .....      | .....     |
| Dd2                 | .....      | .....      | .....      | .....     | .....     | .....      | .....      | .....     |
| D10                 | .....      | .....      | .....      | .....     | .....     | .....      | .....      | .....     |
| FCC2                | .....      | .....      | .....      | .....     | .....     | .....      | .....      | .....     |
| HB3                 | .....      | .....      | .....      | .....     | .....     | .....      | .....      | .....     |
| 7G8                 | .....      | .....      | .....      | .....     | .....     | .....      | .....      | .....     |
| <i>P.reichenowi</i> | .....      | .....      | .....A     | .....     | .....     | .....T.    | .....      | .....     |

|                     | 2890       | 2900       | 2910       | 2920      | 2930         |
|---------------------|------------|------------|------------|-----------|--------------|
| PF14_0201           | AGTAATGCAC | TCTTAGTAAT | TTTACTTTTA | TTATTATAG | AATTCCTATA A |
| 3D7                 | .....      | .....      | .....      | .....     | .....        |
| RO33                | .....      | .....      | .....      | .....     | .....        |
| Palo Alto           | .....      | .....      | .....      | .....     | .....        |
| FCR3                | .....      | .....      | .....      | .....     | .....        |
| Wellcome            | .....      | .....      | .....      | .....     | .....        |
| D6                  | .....      | .....      | .....      | .....     | .....        |
| T996                | .....      | .....      | .....      | .....     | .....        |
| T9102               | .....      | .....      | .....      | .....     | .....        |
| K1                  | .....      | .....      | .....      | .....     | .....        |
| Dd2                 | .....      | .....      | .....      | .....     | .....        |
| D10                 | .....      | .....      | .....      | .....     | .....        |
| FCC2                | .....      | .....      | .....      | .....     | .....        |
| HB3                 | .....      | .....      | .....      | .....     | .....        |
| 7G8                 | .....      | .....      | .....      | .....     | .....        |
| <i>P.reichenowi</i> | .....      | .....      | .....      | .....     | .....        |



**PFF0995c**

|                     |            |            |            |            |            |            |            |            |
|---------------------|------------|------------|------------|------------|------------|------------|------------|------------|
|                     | 10         | 20         | 30         | 40         | 50         | 60         | 70         | 80         |
| PFF0995c            | ATGATGTTTT | TTAAGTGATA | TCAGGTTTTT | ACCTTGGTTT | TTTTGTTGCT | CTTATATTTT | AACAATATTG | TCTACACCCA |
| 3D7                 | .....      | .....      | .....      | .....      | .....      | .....      | .....      | .....      |
| RO33                | .....      | .....      | .....      | .....      | .....      | .....      | .....      | .....      |
| Palo Alto           | .....      | .....      | .....      | .....      | .....      | .....      | .....      | .....      |
| FCR3                | .....      | .....      | .....      | .....      | .....      | .....      | .....      | .....      |
| Wellcome            | .....      | .....      | .....      | .....      | .....      | .....      | .....      | .....      |
| D6                  | .....      | .....      | .....      | .....      | .....      | .....      | .....      | .....      |
| T996                | .....      | .....      | .....      | .....      | .....      | .....      | .....      | .....      |
| T9102               | .....      | .....      | .....      | .....      | .....      | .....      | .....      | .....      |
| K1                  | .....      | .....      | .....      | .....      | .....      | .....      | .....      | .....      |
| Dd2                 | .....      | .....      | .....      | .....      | .....      | .....      | .....      | .....      |
| D10                 | .....      | .....      | .....      | .....      | .....      | .....      | .....      | .....      |
| FCC2                | .....      | .....      | .....      | .....      | .....      | .....      | .....      | .....      |
| HB3                 | .....      | .....      | .....      | .....      | .....      | .....      | .....      | .....      |
| 7G8                 | .....      | .....      | .....      | .....      | .....      | .....      | .....      | .....      |
| <i>P.reichenowi</i> | .....      | .....      | .A.T       | .....      | .....      | .....      | .....      | .....      |

|                     |            |            |            |            |            |            |            |            |
|---------------------|------------|------------|------------|------------|------------|------------|------------|------------|
|                     | 90         | 100        | 110        | 120        | 130        | 140        | 150        | 160        |
| PFF0995c            | TGTAGATGAT | ATAAAAAATA | CATCCCAGAA | GAAAATTACA | TATGATAAAT | ATAATAAAAA | TAAAGAAAAT | ATGAATAATG |
| 3D7                 | .....      | .....      | .....      | .....      | .....      | .....      | .....      | .....      |
| RO33                | .....      | .....      | .....      | .....      | .....      | .....      | .....      | .....      |
| Palo Alto           | .....      | .....      | .....      | .....      | .....      | .....      | .....      | .....      |
| FCR3                | .....      | .....      | .....      | .....      | .....      | .....      | .....      | .....      |
| Wellcome            | .....      | .....      | .....      | .....      | .....      | .....      | .....      | .....      |
| D6                  | .....      | .....      | .....      | .....      | .....      | .....      | .....      | .....      |
| T996                | .....      | .....      | .....      | .....      | .....      | .....      | .....      | .....      |
| T9102               | .....      | .....      | .....      | .....      | .....      | .....      | .....      | .....      |
| K1                  | .....      | .....      | .....      | .....      | .....      | .....      | .....      | .....      |
| Dd2                 | .....      | .....      | .....      | .....      | .....      | .....      | .....      | .....      |
| D10                 | .....      | .....      | .....      | .....      | .....      | .....      | .....      | .....      |
| FCC2                | .....      | .....      | .....      | .....      | .....      | .....      | .....      | .....      |
| HB3                 | .....      | .....      | .....      | .....      | .....      | .....      | .....      | .....      |
| 7G8                 | .....      | .....      | .....      | .....      | .....      | .....      | .....      | .....      |
| <i>P.reichenowi</i> | .....      | .....      | .G         | .....      | .....      | .....      | .C         | .....      |

|                     |           |            |            |            |            |           |            |            |
|---------------------|-----------|------------|------------|------------|------------|-----------|------------|------------|
|                     | 170       | 180        | 190        | 200        | 210        | 220       | 230        | 240        |
| PFF0995c            | AAAAAATGA | TAATAAAGAT | AATAAAGATA | ATATTTATAA | TGATAATATT | ATAATGATA | ATATTAATAA | TGATAATATT |
| 3D7                 | .....     | .....      | .....      | .....      | .....      | .....     | .....      | .....      |
| RO33                | .....     | .....      | .....      | .....      | .....      | .....     | .....      | .....      |
| Palo Alto           | .....     | .....      | .....      | .....      | .....      | .....     | .....      | .....      |
| FCR3                | .....     | .....      | .....      | .....      | .....      | .....     | .....      | .....      |
| Wellcome            | .....     | .....      | .....      | .....      | .....      | .....     | .....      | .....      |
| D6                  | .....     | .....      | .....      | .....      | .....      | .....     | .....      | .....      |
| T996                | .....     | .....      | .....      | .....      | .....      | .....     | .....      | .....      |
| T9102               | .....     | .....      | .....      | .....      | .....      | .....     | .....      | .....      |
| K1                  | .....     | .....      | .....      | .....      | .....      | .....     | .....      | .....      |
| Dd2                 | .....     | .....      | .....      | .....      | .....      | .....     | .....      | .....      |
| D10                 | .....     | .....      | .....      | .....      | .....      | .....     | .....      | .....      |
| FCC2                | .....     | .....      | .....      | .....      | .....      | .....     | .....      | .....      |
| HB3                 | .....     | .....      | .....      | .....      | .....      | .....     | .....      | .....      |
| 7G8                 | .....     | .....      | .....      | .....      | .....      | .....     | .....      | .....      |
| <i>P.reichenowi</i> | .....     | .....      | .....      | G          | .....      | A         | .....      | A          |

|                     |            |            |           |            |            |           |           |           |
|---------------------|------------|------------|-----------|------------|------------|-----------|-----------|-----------|
|                     | 250        | 260        | 270       | 280        | 290        | 300       | 310       | 320       |
| PFF0995c            | AATAATGAAG | ATGAGTATAA | ATTTTATCT | ATGAAACATT | ATAAAGATAG | TTTATCAAT | AAATTAATA | ATGAAATGA |
| 3D7                 | .....      | .....      | .....     | .....      | .....      | .....     | .....     | .....     |
| RO33                | .....      | .....      | .....     | .....      | .....      | .....     | .....     | .....     |
| Palo Alto           | .....      | .....      | .....     | .....      | .....      | .....     | .....     | .....     |
| FCR3                | .....      | .....      | .....     | .....      | .....      | .....     | .....     | .....     |
| Wellcome            | .....      | .....      | .....     | .....      | .....      | .....     | .....     | .....     |
| D6                  | .....      | .....      | .....     | .....      | .....      | .....     | .....     | .....     |
| T996                | .....      | .....      | .....     | .....      | .....      | .....     | .....     | .....     |
| T9102               | .....      | .....      | .....     | .....      | .....      | .....     | .....     | .....     |
| K1                  | .....      | .....      | .....     | .....      | .....      | .....     | .....     | .....     |
| Dd2                 | .....      | .....      | .....     | .....      | .....      | .....     | .....     | .....     |
| D10                 | .....      | .....      | .....     | .....      | .....      | .....     | .....     | .....     |
| FCC2                | .....      | .....      | .....     | .....      | .....      | .....     | .....     | .....     |
| HB3                 | .....      | .....      | .....     | .....      | .....      | .....     | .....     | .....     |
| 7G8                 | .....      | .....      | .....     | .....      | .....      | .....     | .....     | .....     |
| <i>P.reichenowi</i> | .....      | .....      | .....     | A          | .....      | A         | .....     | .....     |



|                     | 650                  | 660                  | 670                  | 680                  | 690                  | 700                  | 710                  | 720        |
|---------------------|----------------------|----------------------|----------------------|----------------------|----------------------|----------------------|----------------------|------------|
| PF0995c             | TTTCCCAT             | TATATAAA             | AAATTAGATA           | ACGAATCATT           | ATCTCTTGAT           | AATAAATATG           | ATGATTATTA           | TAATTTACCA |
| 3D7                 | .....                | .....                | .....                | .....                | .....                | .....                | .....                | .....      |
| RO33                | .....                | .....                | .....                | .....                | .....                | .....                | .....                | .....      |
| Palo Alto           | .....                | .....                | .....                | .....                | .....                | .....                | .....                | .....      |
| FCR3                | .....                | .....                | .....                | .....                | .....                | .....                | .....                | .....      |
| Wellcome            | .....                | .....                | .....                | .....                | .....                | .....                | .....                | .....      |
| D6                  | .....                | .....                | .....                | .....                | .....                | .....                | .....                | .....      |
| T996                | .....                | .....                | .....                | .....                | .....                | .....                | .....                | .....      |
| T9102               | .....                | .....                | .....                | .....                | .....                | .....                | .....                | .....      |
| K1                  | .....                | .....                | .....                | .....                | .....                | .....                | .....                | .....      |
| Dd2                 | .....                | .....                | .....                | .....                | .....                | .....                | .....                | .....      |
| D10                 | .....                | .....                | .....                | .....                | .....                | .....                | .....                | .....      |
| FCC2                | .....                | .....                | .....                | .....                | .....                | .....                | .....                | .....      |
| HB3                 | .....                | .....                | .....                | .....                | .....                | .....                | .....                | .....      |
| 7G8                 | .....                | .....                | .....                | .....                | .....                | .....                | .....                | .....      |
| <i>P.reichenowi</i> | ..... <b>T</b> ..... | ..... <b>A</b> ..... | ..... <b>A</b> ..... | ..... <b>G</b> ..... | ..... <b>C</b> ..... | ..... <b>C</b> ..... | ..... <b>G</b> ..... | .....      |

|                     | 730                  | 740        | 750       | 760        | 770       | 780                  | 790                  | 800                  |
|---------------------|----------------------|------------|-----------|------------|-----------|----------------------|----------------------|----------------------|
| PF0995c             | AATGATCATA           | ATGACACACA | TAAAGAAAT | TCAAGTGATC | ATAATTATT | AGGATATAAA           | TTGGGTAACA           | ATCTAAAATC           |
| 3D7                 | .....                | .....      | .....     | .....      | .....     | .....                | .....                | .....                |
| RO33                | .....                | .....      | .....     | .....      | .....     | .....                | .....                | .....                |
| Palo Alto           | .....                | .....      | .....     | .....      | .....     | .....                | .....                | .....                |
| FCR3                | .....                | .....      | .....     | .....      | .....     | .....                | .....                | .....                |
| Wellcome            | .....                | .....      | .....     | .....      | .....     | .....                | .....                | .....                |
| D6                  | .....                | .....      | .....     | .....      | .....     | .....                | .....                | .....                |
| T996                | .....                | .....      | .....     | .....      | .....     | .....                | .....                | .....                |
| T9102               | .....                | .....      | .....     | .....      | .....     | .....                | .....                | .....                |
| K1                  | .....                | .....      | .....     | .....      | .....     | .....                | .....                | .....                |
| Dd2                 | .....                | .....      | .....     | .....      | .....     | .....                | .....                | .....                |
| D10                 | .....                | .....      | .....     | .....      | .....     | .....                | .....                | .....                |
| FCC2                | .....                | .....      | .....     | .....      | .....     | .....                | .....                | .....                |
| HB3                 | .....                | .....      | .....     | .....      | .....     | .....                | .....                | .....                |
| 7G8                 | .....                | .....      | .....     | .....      | .....     | .....                | .....                | .....                |
| <i>P.reichenowi</i> | ..... <b>G</b> ..... | .....      | .....     | .....      | .....     | ..... <b>A</b> ..... | ..... <b>T</b> ..... | ..... <b>C</b> ..... |

|                     | 810                  | 820       | 830                  | 840                  | 850                  | 860                  | 870                  | 880                  |
|---------------------|----------------------|-----------|----------------------|----------------------|----------------------|----------------------|----------------------|----------------------|
| PF0995c             | ATATTGATA            | GAAGAAATG | ATGTTCTCA            | AAAAAAACT            | GATGACATAA           | ATGAAAGTGC           | AAGTAGTGAC           | TCTGAAAACA           |
| 3D7                 | .....                | .....     | .....                | .....                | .....                | .....                | .....                | .....                |
| RO33                | .....                | .....     | .....                | .....                | .....                | .....                | .....                | .....                |
| Palo Alto           | .....                | .....     | .....                | .....                | .....                | .....                | .....                | .....                |
| FCR3                | .....                | .....     | .....                | .....                | .....                | .....                | .....                | .....                |
| Wellcome            | .....                | .....     | .....                | .....                | .....                | .....                | .....                | .....                |
| D6                  | .....                | .....     | .....                | .....                | .....                | .....                | .....                | .....                |
| T996                | .....                | .....     | .....                | .....                | .....                | .....                | .....                | .....                |
| T9102               | .....                | .....     | .....                | .....                | .....                | .....                | .....                | .....                |
| K1                  | .....                | .....     | .....                | .....                | .....                | .....                | .....                | .....                |
| Dd2                 | .....                | .....     | .....                | .....                | .....                | .....                | .....                | .....                |
| D10                 | .....                | .....     | .....                | .....                | .....                | .....                | .....                | .....                |
| FCC2                | .....                | .....     | .....                | .....                | .....                | .....                | .....                | .....                |
| HB3                 | .....                | .....     | .....                | .....                | .....                | .....                | .....                | .....                |
| 7G8                 | .....                | .....     | .....                | .....                | .....                | .....                | .....                | .....                |
| <i>P.reichenowi</i> | ..... <b>G</b> ..... | .....     | ..... <b>C</b> ..... | ..... <b>C</b> ..... | ..... <b>C</b> ..... | ..... <b>C</b> ..... | ..... <b>A</b> ..... | ..... <b>G</b> ..... |

|                     | 890        | 900        | 910        | 920       | 930                  | 940                  | 950                   | 960                   |
|---------------------|------------|------------|------------|-----------|----------------------|----------------------|-----------------------|-----------------------|
| PF0995c             | TTCAAGAAAT | TCTCAGTACG | GATTCAAATA | CATCTCATT | GAAGGAACGA           | AAAAATCAAA           | AAGTCCACC             | CGGTGAACAT            |
| 3D7                 | .....      | .....      | .....      | .....     | .....                | .....                | .....                 | .....                 |
| RO33                | .....      | .....      | .....      | .....     | .....                | .....                | .....                 | .....                 |
| Palo Alto           | .....      | .....      | .....      | .....     | .....                | ..... <b>C</b> ..... | .....                 | .....                 |
| FCR3                | .....      | .....      | .....      | .....     | .....                | .....                | .....                 | .....                 |
| Wellcome            | .....      | .....      | .....      | .....     | .....                | .....                | .....                 | .....                 |
| D6                  | .....      | .....      | .....      | .....     | .....                | .....                | .....                 | .....                 |
| T996                | .....      | .....      | .....      | .....     | .....                | .....                | .....                 | .....                 |
| T9102               | .....      | .....      | .....      | .....     | .....                | .....                | ..... <b>T</b> .....  | .....                 |
| K1                  | .....      | .....      | .....      | .....     | .....                | .....                | .....                 | .....                 |
| Dd2                 | .....      | .....      | .....      | .....     | .....                | .....                | .....                 | .....                 |
| D10                 | .....      | .....      | .....      | .....     | .....                | .....                | .....                 | .....                 |
| FCC2                | .....      | .....      | .....      | .....     | .....                | .....                | .....                 | .....                 |
| HB3                 | .....      | .....      | .....      | .....     | .....                | .....                | .....                 | .....                 |
| 7G8                 | .....      | .....      | .....      | .....     | .....                | .....                | .....                 | .....                 |
| <i>P.reichenowi</i> | .....      | .....      | .....      | .....     | ..... <b>A</b> ..... | ..... <b>G</b> ..... | ..... <b>C</b> .....  | ..... <b>AA</b> ..... |
|                     | .....      | .....      | .....      | .....     | .....                | .....                | ..... <b>AA</b> ..... | ..... <b>C</b> .....  |
