# Supplementary material for: Prospective Identification of Malaria Parasite Genes under Balancing Selection
Source: PubMed Central journal article supplement (PMC2679211; doi:10.1371/journal.pone.0005568), 2009-05-15
Supplement: pone.0005568.s002.pdf [file pone.0005568.s002.pdf]

## Supplementary Figure 2

### MSP6

|                       | 10          | 20          | 30          | 40          | 50          | 60          | 70          | 80          |
|-----------------------|-------------|-------------|-------------|-------------|-------------|-------------|-------------|-------------|
| PF10_0346_3D7         | ..... ..... | ..... ..... | ..... ..... | ..... ..... | ..... ..... | ..... ..... | ..... ..... | ..... ..... |
| PF10_0346_K1_AY518890 | ATGAATAAGA  | TTTATAATAT  | TACTTTTCTT  | TTCATTCTTT  | TAAACTTATA  | TATAAATGAA  | AATAACTTTA  | TCAGAAATGA  |
| 3D7                   | .....       | .....       | .....       | .....       | .....       | .....       | .....       | .....       |
| RO33                  | .....       | .....       | .....       | .....       | .....       | .....       | .....       | .....       |
| Palo Alto             | .....       | .....       | .....       | .....       | .....       | .....       | .....       | .....       |
| FCR3                  | .....       | .....       | .....       | .....       | .....       | .....       | .....       | .....       |
| Wellcome              | .....       | .....       | .....       | .....       | .....       | .....       | .....       | .....       |
| D6                    | .....       | .....       | .....       | .....       | .....       | .....       | .....       | .....       |
| T996                  | .....       | .....       | .....       | .....       | .....       | .....       | .....       | .....       |
| T9102                 | .....       | .....       | .....       | .....       | .....       | .....       | .....       | .....       |
| K1                    | .....       | .....       | .....       | .....       | .....       | .....       | .....       | .....       |
| Dd2                   | .....       | .....       | .....       | .....       | .....       | .....       | .....       | .....       |
| D10                   | .....       | .....       | .....       | .....       | .....       | .....       | .....       | .....       |
| FCC2                  | .....       | .....       | .....       | .....       | .....       | .....       | .....       | .....       |
| 7G8                   | .....       | .....       | .....       | .....       | .....       | .....       | .....       | .....       |
| HB3                   | .....       | .....       | .....       | .....       | .....       | .....       | .....       | .....       |
| <i>P.reichenowi</i>   | .....       | .....       | .....       | .....       | .....       | .....       | .....       | .....       |

  

|                       | 90          | 100         | 110         | 120         | 130         | 140         | 150         | 160         |
|-----------------------|-------------|-------------|-------------|-------------|-------------|-------------|-------------|-------------|
| PF10_0346_3D7         | ..... ..... | ..... ..... | ..... ..... | ..... ..... | ..... ..... | ..... ..... | ..... ..... | ..... ..... |
| PF10_0346_K1_AY518890 | ACTTATAAAC  | GAAAAAACC   | ATAATTTAAG  | AAATGGTTC   | ATGTATAATA  | ACGATAAAAT  | ATTAAGTAAA  | AATGAAGTAG  |
| 3D7                   | .....       | .....       | .....       | .....       | .....       | .....       | .....       | .....       |
| RO33                  | .....       | .....       | .....       | .....       | .....       | .....       | .....       | .....       |
| Palo Alto             | .....       | .....       | .....       | .....       | .....       | .....       | .....       | .....       |
| FCR3                  | .....       | .....       | .....       | .....       | .....       | .....       | .....       | .....       |
| Wellcome              | .....       | .....       | .....       | .....       | .....       | .....       | .....       | .....       |
| D6                    | .....       | .....       | .....       | .....       | .....       | .....       | .....       | .....       |
| T996                  | .....       | .....       | .....       | .....       | .....       | .....       | .....       | .....       |
| T9102                 | .....       | .....       | .....       | .....       | .....       | .....       | .....       | .....       |
| K1                    | .....       | .....       | .....       | .....       | .....       | .....       | .....       | .....       |
| Dd2                   | .....       | .....       | .....       | .....       | .....       | .....       | .....       | .....       |
| D10                   | .....       | .....       | .....       | .....       | .....       | .....       | .....       | .....       |
| FCC2                  | .....       | .....       | .....       | .....       | .....       | .....       | .....       | .....       |
| 7G8                   | .....       | .....       | .....       | .....       | .....       | .....       | .....       | .....       |
| HB3                   | .....       | .....       | .....       | .....       | .....       | .....       | .....       | .....       |
| <i>P.reichenowi</i>   | .....       | .....       | .....       | .....       | .....       | .....       | .....       | .....       |

  

|                       | 170         | 180         | 190         | 200         | 210         | 220         | 230         | 240         |
|-----------------------|-------------|-------------|-------------|-------------|-------------|-------------|-------------|-------------|
| PF10_0346_3D7         | ..... ..... | ..... ..... | ..... ..... | ..... ..... | ..... ..... | ..... ..... | ..... ..... | ..... ..... |
| PF10_0346_K1_AY518890 | ATACTAATAT  | AGAAAGTAAC  | GAAAATAGTA  | TTCACGAATC  | TGGACATAAG  | ATTGATGGGG  | AAGAAGTTTT  | AAAAGCTAAT  |
| 3D7                   | .....       | .....       | .....       | .....       | .....       | .....       | .....       | .....       |
| RO33                  | .....       | .....       | .....       | .....       | .....       | .....       | .....       | .....       |
| Palo Alto             | .....       | .....       | .....       | .....       | .....       | .....       | .....       | .....       |
| FCR3                  | .....       | .....       | .....       | .....       | .....       | .....       | .....       | .....       |
| Wellcome              | .....       | .....       | .....       | .....       | .....       | .....       | .....       | .....       |
| D6                    | .....       | .....       | .....       | .....       | .....       | .....       | .....       | .....       |
| T996                  | .....       | .....       | .....       | .....       | .....       | .....       | .....       | .....       |
| T9102                 | .....       | .....       | .....       | .....       | .....       | .....       | .....       | .....       |
| K1                    | .....       | .....       | .....       | .....       | .....       | .....       | .....       | .....       |
| Dd2                   | .....       | .....       | .....       | .....       | .....       | .....       | .....       | .....       |
| D10                   | .....       | .....       | .....       | .....       | .....       | .....       | .....       | .....       |
| FCC2                  | .....       | .....       | .....       | .....       | .....       | .....       | .....       | .....       |
| 7G8                   | .....       | .....       | .....       | .....       | .....       | .....       | .....       | .....       |
| HB3                   | .....       | .....       | .....       | .....       | .....       | .....       | .....       | .....       |
| <i>P.reichenowi</i>   | .....       | .....       | .....       | .....       | .....       | .....       | .....       | .....       |

  

|                       | 250         | 260         | 270         | 280         | 290         | 300         | 310         | 320         |
|-----------------------|-------------|-------------|-------------|-------------|-------------|-------------|-------------|-------------|
| PF10_0346_3D7         | ..... ..... | ..... ..... | ..... ..... | ..... ..... | ..... ..... | ..... ..... | ..... ..... | ..... ..... |
| PF10_0346_K1_AY518890 | CAAGAACAAG  | CTAAT.....  | A.....      | TGATATAACA  | TACAAAAAAA  | AAAATGTTGA  | TGATTCAGAA  | ATTCCTTTT   |
| 3D7                   | .....       | .....       | .....       | .....       | .....       | .....       | .....       | .....       |
| RO33                  | .....       | .....       | .....       | .....       | .....       | .....       | .....       | .....       |
| Palo Alto             | CAAGAACAAG  | CTAAT.....  | A.....      | TGATATAACA  | TACAAAAAAA  | AAAATGTTGA  | TGATTCAGAA  | ATTCCTTTT   |
| FCR3                  | .....       | .....       | .....       | .....       | .....       | .....       | .....       | .....       |
| Wellcome              | .....       | .....       | .....       | .....       | .....       | .....       | .....       | .....       |
| D6                    | CAAGAACAAG  | CTAAT.....  | A.....      | TGATATAACA  | TACAAAAAAA  | AAAATGTTGA  | TGATTCAGAA  | ATTCCTTTT   |
| T996                  | .....       | .....       | .....       | .....       | .....       | .....       | .....       | .....       |
| T9102                 | .....       | .....       | .....       | .....       | .....       | .....       | .....       | .....       |
| K1                    | CAAGAACAAG  | CTAAT.....  | A.....      | TGATATAACA  | TACAAAAAAA  | AAAATGTTGA  | TGATTCAGAA  | ATTCCTTTT   |
| Dd2                   | CAAGAACAAG  | CTAAT.....  | A.....      | TGATATAACA  | TACAAAAAAA  | AAAATGTTGA  | TGATTCAGAA  | ATTCCTTTT   |
| D10                   | .....       | .....       | .....       | .....       | .....       | .....       | .....       | .....       |
| FCC2                  | .....       | .....       | .....       | .....       | .....       | .....       | .....       | .....       |
| 7G8                   | .....       | .....       | .....       | .....       | .....       | .....       | .....       | .....       |
| HB3                   | .....       | .....       | .....       | .....       | .....       | .....       | .....       | .....       |
| <i>P.reichenowi</i>   | CAAGAACAAC  | CTAAT.....  | A.....      | TGATATAACA  | TACAAAAAAA  | AAAATGTTGA  | TGATTCAGAA  | ATTCCTTTT   |

|                       | 330                                                         | 340        | 350        | 360        | 370        | 380        | 390        | 400        |
|-----------------------|-------------------------------------------------------------|------------|------------|------------|------------|------------|------------|------------|
| PF10_0346_3D7         | ..... ..... ..... ..... ..... ..... ..... ..... .....       | TATACAAGCA | ACATATCAAT | TTCCTTCTAC | ATCA-----  | -----GG    | AGGAAATAAT | GTAATTCCAC |
| PF10_0346_K1_AY518890 | .....G... ..... ..... ..... ..... ..... ..... ..... .....   | .....G...  | .....C...  | .C..GGAAGA | ATTATAAATC | CTCGTACT.. | .....C.    | .....      |
| 3D7                   | ..... ..... ..... ..... ..... ..... ..... ..... .....       | .....      | .....      | .....      | .....      | .....      | .....      | .....      |
| RO33                  | ..... ..... ..... ..... ..... ..... ..... ..... .....       | .....      | .....      | .....      | .....      | .....      | .....      | .....      |
| Palo Alto             | .....G... ..... ..... ..... ..... ..... ..... ..... .....   | .....G...  | .....C...  | .C..GGAAGA | ATTATAAATC | CTCGTACT.. | .....C.    | .....      |
| FCR3                  | ..... ..... ..... ..... ..... ..... ..... ..... .....       | .....      | .....      | .....      | .....      | .....      | .....      | .....      |
| Wellcome              | ..... ..... ..... ..... ..... ..... ..... ..... .....       | .....      | .....      | .....      | .....      | .....      | .....      | .....      |
| D6                    | .....G... ..... ..... ..... ..... ..... ..... ..... .....   | .....G...  | .....C...  | .C..GGAAGA | ATTATAAATC | CTCGTACT.. | .....C.    | .....A..   |
| T996                  | ..... ..... ..... ..... ..... ..... ..... ..... .....       | .....      | .....      | .....      | .....      | .....      | .....      | .....      |
| T9102                 | ..... ..... ..... ..... ..... ..... ..... ..... .....       | .....      | .....      | .....      | .....      | .....      | .....      | .....      |
| K1                    | .....G... ..... ..... ..... ..... ..... ..... ..... .....   | .....G...  | .....C...  | .C..GGAAGA | ATTATAAATC | CTCGTACT.. | .....C.    | .....      |
| Dd2                   | .....G... ..... ..... ..... ..... ..... ..... ..... .....   | .....G...  | .....C...  | .C..GGAAGA | ATTATAAATC | CTCGTACT.. | .....C.    | .....      |
| D10                   | ..... ..... ..... ..... ..... ..... ..... ..... .....       | .....      | .....      | .....      | .....      | .....      | .....      | .....      |
| FCC2                  | ..... ..... ..... ..... ..... ..... ..... ..... .....       | .....      | .....      | .....      | .....      | .....      | .....      | .....      |
| 7G8                   | ..... ..... ..... ..... ..... ..... ..... ..... .....       | .....      | .....      | .....      | .....      | .....      | .....      | .....      |
| HB3                   | .....G... ..... ..... ..... ..... ..... ..... ..... .....   | .....G...  | .....C...  | .C..GGAAGA | ATTATAAATC | CTCGTACT.. | .....C.    | .....      |
| <i>P.reichenowi</i>   | .....G.G... ..... ..... ..... ..... ..... ..... ..... ..... | .....G.G   | .....CG..A | .C..GGAAGA | ATTACAAATC | CTCGTACT.. | .....C.    | .....A..   |

|                       | 410                                                     | 420        | 430         | 440        | 450        | 460        | 470        | 480        |
|-----------------------|---------------------------------------------------------|------------|-------------|------------|------------|------------|------------|------------|
| PF10_0346_3D7         | ..... ..... ..... ..... ..... ..... ..... ..... .....   | TTCTATAAAA | ACAAAAGT--- | -----      | -----      | -----      | -----      | -----      |
| PF10_0346_K1_AY518890 | C.....G..G                                              | ..T...GGA  | CTAGAAGGTG  | TTTCTTATCC | ACATGTATTT | ACATCTTCTA | ATCAATCACA | TCCTCAAAGA |
| 3D7                   | ..... ..... ..... ..... ..... ..... ..... ..... .....   | .....      | .....       | .....      | .....      | .....      | .....      | .....      |
| RO33                  | ..... ..... ..... ..... ..... ..... ..... ..... .....   | .....      | .....       | .....      | .....      | .....      | .....      | .....      |
| Palo Alto             | C.....G..G                                              | ..T...GGA  | CTAGAAGGTG  | TTTCTTATCC | ACATGTATTT | ACATCTTCTA | ATCAATCACA | TCCTCAAAGA |
| FCR3                  | ..... ..... ..... ..... ..... ..... ..... ..... .....   | .....      | .....       | .....      | .....      | .....      | .....      | .....      |
| Wellcome              | ..... ..... ..... ..... ..... ..... ..... ..... .....   | .....      | .....       | .....      | .....      | .....      | .....      | .....      |
| D6                    | C.....G..G                                              | ..T...GGA  | CTAGAAGGTG  | TTTCTTATCC | ACATGTATTT | ACATCTTCTA | ATCAATCACA | TCCTCAAAGA |
| T996                  | ..... ..... ..... ..... ..... ..... ..... ..... .....   | .....      | .....       | .....      | .....      | .....      | .....      | .....      |
| T9102                 | ..... ..... ..... ..... ..... ..... ..... ..... .....   | .....      | .....       | .....      | .....      | .....      | .....      | .....      |
| K1                    | C.....G..G                                              | ..T...GGA  | CTAGAAGGTG  | TTTCTTATCC | ACATGTATTT | ACATCTTCTA | ATCAATCACA | TCCTCAAAGA |
| Dd2                   | C.....G..G                                              | ..T...GGA  | CTAGAAGGTG  | TTTCTTATCC | ACATGTATTT | ACATCTTCTA | ATCAATCACA | TCCTCAAAGA |
| D10                   | ..... ..... ..... ..... ..... ..... ..... ..... .....   | .....      | .....       | .....      | .....      | .....      | .....      | .....      |
| FCC2                  | ..... ..... ..... ..... ..... ..... ..... ..... .....   | .....      | .....       | .....      | .....      | .....      | .....      | .....      |
| 7G8                   | .C..... ..... ..... ..... ..... ..... ..... ..... ..... | .C.....    | .....       | .....      | .....      | .....      | .....      | .....      |
| HB3                   | ..... ..... ..... ..... ..... ..... ..... ..... .....   | .....      | .....       | .....      | .....      | .....      | .....      | .....      |
| <i>P.reichenowi</i>   | C.....GT.G                                              | ..T...GGA  | CTAGAAGGTG  | TTTCTTATCC | ATTGTATAT  | ACATCTTCTA | ATCAACCACG | TCCTCAAAGA |

|                       | 490                                                   | 500        | 510        | 520        | 530        | 540        | 550        | 560        |
|-----------------------|-------------------------------------------------------|------------|------------|------------|------------|------------|------------|------------|
| PF10_0346_3D7         | ..... ..... ..... ..... ..... ..... ..... ..... ..... | -----      | -----      | -----      | -----      | -----      | -----GGAG  | AAAATCAATA |
| PF10_0346_K1_AY518890 | GCCAACATCG                                            | GAGGAATATC | CCATTTATCA | GGGACACGTG | GAATTCATAC | TTATTCAGGT | GAAAGT.... | .....CC.   |
| 3D7                   | ..... ..... ..... ..... ..... ..... ..... ..... ..... | .....      | .....      | .....      | .....      | .....      | .....      | .....      |
| RO33                  | ..... ..... ..... ..... ..... ..... ..... ..... ..... | .....      | .....      | .....      | .....      | .....      | .....      | .....      |
| Palo Alto             | GCCAACATCG                                            | GAGGAATATC | CCATTTATCA | GGGACACGTG | GAATTCATAC | TTATTCAGGT | GAAAGT.... | .....CC.   |
| FCR3                  | ..... ..... ..... ..... ..... ..... ..... ..... ..... | .....      | .....      | .....      | .....      | .....      | .....      | .....      |
| Wellcome              | ..... ..... ..... ..... ..... ..... ..... ..... ..... | .....      | .....      | .....      | .....      | .....      | .....      | .....      |
| D6                    | GCCAACATCG                                            | GAGGAATATC | CCATTTATCA | GGGACACGTG | GAATTCATAC | TTATTCAGGT | GAAAGT.... | .....CC.   |
| T996                  | ..... ..... ..... ..... ..... ..... ..... ..... ..... | .....      | .....      | .....      | .....      | .....      | .....      | .....      |
| T9102                 | ..... ..... ..... ..... ..... ..... ..... ..... ..... | .....      | .....      | .....      | .....      | .....      | .....      | .....      |
| K1                    | GCCAACATCG                                            | GAGGAATATC | CCATTTATCA | GGGACACGTG | GAATTCATAC | TTATTCAGGT | GAAAGT.... | .....CC.   |
| Dd2                   | GCCAACATCG                                            | GAGGAATATC | CCATTTATCA | GGGACACGTG | GAATTCATAC | TTATTCAGGT | GAAAGT.... | .....CC.   |
| D10                   | ..... ..... ..... ..... ..... ..... ..... ..... ..... | .....      | .....      | .....      | .....      | .....      | .....      | .....      |
| FCC2                  | ..... ..... ..... ..... ..... ..... ..... ..... ..... | .....      | .....      | .....      | .....      | .....      | .....      | .....      |
| 7G8                   | ..... ..... ..... ..... ..... ..... ..... ..... ..... | .....      | .....      | .....      | .....      | .....      | .....      | .....      |
| HB3                   | ..... ..... ..... ..... ..... ..... ..... ..... ..... | .....      | .....      | .....      | .....      | .....      | .....      | .....      |
| <i>P.reichenowi</i>   | GCCAACATCG                                            | GAGGCATATC | CCATTTATCA | GGGATACGTG | GAATTCATAC | TTATTCAGGT | GAAAGT.... | .....C.    |

|                       | 570                                                       | 580        | 590        | 600        | 610        | 620       | 630        | 640        |             |
|-----------------------|-----------------------------------------------------------|------------|------------|------------|------------|-----------|------------|------------|-------------|
| PF10_0346_3D7         | ..... ..... ..... ..... ..... ..... ..... ..... .....     | TACTGTTACA | TCTATATCAG | GTATTCAAAA | GGGAGCAAAT | GGTTAACTG | GTGCAACAGA | AAATATTACA | CAAGTTGTAC  |
| PF10_0346_K1_AY518890 | ..T.....                                                  | A.C.G.C..A | A..C.....  | CC.....A   | .....      | .....     | .....      | ..A.....   | .C.G..C.G   |
| 3D7                   | ..... ..... ..... ..... ..... ..... ..... ..... .....     | .....      | .....      | .....      | .....      | .....     | .....      | .....      | .....       |
| RO33                  | ..... ..... ..... ..... ..... ..... ..... ..... .....     | .....      | .....      | .....      | .....      | .....     | .....      | .....      | .....       |
| Palo Alto             | ..T.....                                                  | A.C.G.C..A | A..C.....  | CC.....A   | .....      | .....     | .....      | ..A.....   | .C.G..C.G   |
| FCR3                  | ..... ..... ..... ..... ..... ..... ..... ..... .....     | .....      | .....      | .....      | .....      | .....     | .....      | .....      | .....       |
| Wellcome              | ..... ..... ..... ..... ..... ..... ..... ..... .....     | .....      | .....      | .....      | .....      | .....     | .....      | .....      | .....       |
| D6                    | ..T.....                                                  | A.C.G.C..A | A..C.....  | CC.....A   | .....      | .....     | .....      | ..A.....   | .C.G..C.G   |
| T996                  | ..... ..... ..... ..... ..... ..... ..... ..... .....     | .....      | .....      | .....      | .....      | .....     | .....      | .....      | .....       |
| T9102                 | ..... ..... ..... ..... ..... ..... ..... ..... .....     | .....      | .....      | .....      | .....      | .....     | .....      | .....      | .....       |
| K1                    | ..T.....                                                  | A.C.G.C..A | A..C.....  | CC.....A   | .....      | .....     | .....      | ..A.....   | .C.G..C.G   |
| Dd2                   | ..T.....                                                  | A.C.G.C..A | A..C.....  | CC.....A   | .....      | .....     | .....      | ..A.....   | .C.G..C.G   |
| D10                   | .....G... ..... ..... ..... ..... ..... ..... ..... ..... | .....G...  | .....      | .....      | .....      | .....     | .....      | .....      | .....       |
| FCC2                  | ..... ..... ..... ..... ..... ..... ..... ..... .....     | .....      | .....      | .....      | .....      | .....     | .....      | .....      | .....       |
| 7G8                   | ..... ..... ..... ..... ..... ..... ..... ..... .....     | .....      | .....      | .....      | .....      | .....     | .....      | .....      | .....       |
| HB3                   | ..... ..... ..... ..... ..... ..... ..... ..... .....     | .....      | .....      | .....      | .....      | .....     | .....      | .....      | .....       |
| <i>P.reichenowi</i>   | ..T.....                                                  | .C.G..A    | A..C.....  | C.....     | .A.....    | .....     | ..A.....   | .C.G..A..  | .....G..A.. |

|                       | 650       | 660        | 670        | 680        | 690        | 700        | 710        | 720        |
|-----------------------|-----------|------------|------------|------------|------------|------------|------------|------------|
| PF10_0346_3D7         | AAGCAAATC | TGAAACAAAT | AAAAATCCTA | CTTCTCATAG | TAATAGTACT | ACAACTTCTC | TGAATAATAA | TATACTTGGA |
| PF10_0346_K1_AY518890 | .A.....   | .....      | .....      | .C.GG...   | .A.....    | .....      | .....      | .....      |
| 3D7                   | .....     | .....      | .....      | .....      | .....      | .....      | .....      | .....      |
| RO33                  | .....     | .....      | .....      | .....      | .....      | .....      | .....      | .....      |
| Palo Alto             | .A.....   | .....      | .....      | .C.GG...   | .A.....    | .....      | .....      | .....      |
| FCR3                  | .....     | .....      | .....      | .....      | .....      | .....      | .....      | .....      |
| Wellcome              | .....     | .....      | .....      | .....      | .....      | .....      | .....      | .....      |
| D6                    | .A.....   | .....      | .....      | .C.GG...   | .A.....    | .....      | .....      | .....      |
| T996                  | .....     | .....      | .....      | .....      | .....      | .....      | .....      | .....      |
| T9102                 | .....     | .....      | .....      | .....      | .....      | .....      | .....      | .....      |
| K1                    | .A.....   | .....      | .....      | .C.GG...   | .A.....    | .....      | .....      | .....      |
| Dd2                   | .A.....   | .....      | .....      | .C.GG...   | .A.....    | .....      | .....      | .....      |
| D10                   | .....     | .....      | .....      | .....      | .....      | .....      | .....      | .....      |
| FCC2                  | .....     | .....      | .....      | .....      | .....      | .....      | .....      | .....      |
| 7G8                   | .....     | .....      | .....      | .....      | .....      | .....      | .....      | .....      |
| HB3                   | .....     | .....      | .....      | .....      | .....      | .....      | .....      | .....      |
| <i>P.reichenowi</i>   | .G.....   | .G.....    | .....      | .GG...     | .....      | .....      | .....      | .C.....    |

|                       | 730       | 740        | 750        | 760        | 770        | 780        | 790        | 800         |
|-----------------------|-----------|------------|------------|------------|------------|------------|------------|-------------|
| PF10_0346_3D7         | TGGGAATTG | GAGGAGGTGC | TCCTCAAAAT | GGAGCTGCAG | AAGATAAAAA | GACAGAATAT | TTACTAGAAC | AAATAAAAAAT |
| PF10_0346_K1_AY518890 | .....     | .....      | .....      | .....      | .....      | .....      | .....      | .....       |
| 3D7                   | .....     | .....      | .....      | .....      | .....      | .....      | .....      | .....       |
| RO33                  | .....     | .....      | .....      | .....      | .....      | .....      | .....      | .....       |
| Palo Alto             | .....     | .....      | .....      | .....      | .....      | .....      | .....      | .....       |
| FCR3                  | .....     | .....      | .....      | .....      | .....      | .....      | .....      | .....       |
| Wellcome              | .....     | .....      | .....      | .....      | .....      | .....      | .....      | .....       |
| D6                    | .....     | .....      | .....      | .....      | .....      | .....      | .....      | .....       |
| T996                  | .....     | .....      | .....      | .....      | .....      | .....      | .....      | .....       |
| T9102                 | .....     | .....      | .....      | .....      | .....      | .....      | .....      | .....       |
| K1                    | .....     | .....      | .....      | .....      | .....      | .....      | .....      | .....       |
| Dd2                   | .....     | .....      | .....      | .....      | .....      | .....      | .....      | .....       |
| D10                   | .....     | .....      | .....      | .....      | .....      | .....      | .....      | .....       |
| FCC2                  | .....     | .....      | .....      | .....      | .....      | .....      | .....      | .....       |
| 7G8                   | .....     | .....      | .....      | .....      | .....      | .....      | .....      | .....       |
| HB3                   | .....     | .....      | .....      | .....      | .....      | .....      | .....      | .....       |
| <i>P.reichenowi</i>   | .....     | .....      | .....      | .....      | .....      | .A.TC..    | .....      | .....       |

|                       | 810        | 820        | 830        | 840        | 850        | 860         | 870        | 880           |
|-----------------------|------------|------------|------------|------------|------------|-------------|------------|---------------|
| PF10_0346_3D7         | TCCATCATGG | GATAGAAATA | ACATCCCCGA | TGAGAATGAA | CAAGTAATAG | AGGACCCCTCA | AGAAGATAAT | AAAGATGAAG    |
| PF10_0346_K1_AY518890 | .....      | .....      | .....      | .....      | .A.....    | .....       | .....      | .....         |
| 3D7                   | .....      | .....      | .....      | .....      | .....      | .....       | .....      | .....         |
| RO33                  | .....      | .....      | .....      | .....      | .....      | .....       | .....      | .....         |
| Palo Alto             | .....      | .....      | .....      | .....      | .A.....    | .....       | .....      | .....         |
| FCR3                  | .....      | .....      | .....      | .....      | .....      | .....       | .....      | .....         |
| Wellcome              | .....      | .....      | .....      | .....      | .....      | .....       | .....      | .....         |
| D6                    | .....      | .....      | .....      | .....      | .A.....    | .....       | .....      | .....         |
| T996                  | .....      | .....      | .....      | .....      | .....      | .....       | .....      | .....         |
| T9102                 | .....      | .....      | .....      | .....      | .A.....    | .....       | .....      | .....         |
| K1                    | .....      | .....      | .....      | .....      | .A.....    | .....       | .....      | .....         |
| Dd2                   | .....      | .....      | .....      | .....      | .A.....    | .....       | .....      | .....         |
| D10                   | .....      | .....      | .....      | .....      | .....      | .....       | .....      | .....         |
| FCC2                  | .....      | .....      | .....      | .....      | .A.....    | .....       | .....      | .....         |
| 7G8                   | .....      | .....      | .....      | .....      | .A.....    | .....       | .....      | .....         |
| HB3                   | .....      | .....      | .....      | .....      | .A.....    | .....       | .....      | .....         |
| <i>P.reichenowi</i>   | .....      | .G.....    | .....      | .....      | .....      | .....       | .....      | .A.....C..... |

|                       | 890        | 900       | 910        | 920        | 930        | 940        | 950        | 960        |
|-----------------------|------------|-----------|------------|------------|------------|------------|------------|------------|
| PF10_0346_3D7         | ATGAAGATGA | A-----GAA | ACAGAAACAG | AAAATTTGGA | AACAGAAGAT | GATAATAATG | AAGAGATAGA | AGAAAATGAA |
| PF10_0346_K1_AY518890 | .....      | .....     | .....      | .....      | .....      | .....      | .....      | .....      |
| 3D7                   | .....      | .....     | .....      | .....      | .....      | .....      | .....      | .....      |
| RO33                  | .....      | .....     | .....      | .....      | .....      | .....      | .....      | .....      |
| Palo Alto             | .....      | .GATGAA.. | .....      | .....      | .....      | .....      | .....      | .....      |
| FCR3                  | .....      | .....     | .....      | .....      | .....      | .....      | .....      | .....      |
| Wellcome              | .....      | .....     | .....      | .....      | .....      | .....      | .....      | .....      |
| D6                    | .....      | .....     | .....      | .....      | .....      | .....      | .....      | .....      |
| T996                  | .....      | .....     | .....      | .....      | .....      | .....      | .....      | .....      |
| T9102                 | .....      | .....     | .....      | .....      | .....      | .....      | .....      | .....      |
| K1                    | .....      | .....     | .....      | .....      | .....      | .....      | .....      | .....      |
| Dd2                   | .....      | .....     | .....      | .....      | .....      | .....      | .....      | .....      |
| D10                   | .....      | .....     | .....      | .....      | .....      | .....      | .....      | .....      |
| FCC2                  | .....      | .....     | .....      | .....      | .....      | .....      | .....      | .....      |
| 7G8                   | .....      | .....     | .....      | .....      | .....      | .....      | .....      | .....      |
| HB3                   | .....      | .....     | .....      | .....      | .....      | .....      | .....      | .....      |
| <i>P.reichenowi</i>   | .G.....AAC | -----     | .....      | .....      | .T.....G   | .....      | .....      | .....      |

|                       | 970         | 980         | 990         | 1000        | 1010          | 1020           | 1030            | 1040        |
|-----------------------|-------------|-------------|-------------|-------------|---------------|----------------|-----------------|-------------|
| PF10_0346_3D7         | GAAGATGACA  | TAGATGAAGA  | AAGTGTAGAA  | GAAAAGGAAG  | AAGAGGAAGA    | AAAAAAGGAA     | GAAGAAGAAA      | AAAAGGAAGA  |
| PF10_0346_K1_AY518890 | .....       | .....       | .....       | .....       | .....         | .....          | .....           | .....       |
| 3D7                   | .....       | .....       | .....       | .....       | .....         | .....          | .....           | .....       |
| RO33                  | .....       | .....       | .....       | .....       | .....         | .....          | .....           | .....       |
| Palo Alto             | .....       | .....       | .....       | .....       | .....         | .....          | .....           | .....       |
| FCR3                  | .....       | .....       | .....       | .....       | .....         | .....          | .....           | .....       |
| Wellcome              | .....       | .....       | .....       | .....       | .....         | .....          | .....           | .....       |
| D6                    | .....       | .....       | .....       | .....       | .....         | .....          | .....           | .....       |
| T996                  | .....       | .....       | .....       | .....       | .....         | .....          | .....           | .....       |
| T9102                 | .....       | .....       | .....       | .....       | .....         | .....          | .....           | .....       |
| K1                    | .....       | .....       | .....       | .....       | .....         | .....          | .....           | .....       |
| Dd2                   | .....       | .....       | .....       | .....       | .....         | .....          | .....           | .....       |
| D10                   | .....       | .....       | .....       | .....       | .....         | .....          | .....           | .....       |
| FCC2                  | .....       | .....       | .....       | .....       | .....         | .....          | .....           | .....       |
| 7G8                   | .....       | .....       | .....       | .....       | .....         | .....          | .....           | .....       |
| HB3                   | .....       | .....       | .....       | .....       | .....         | .....          | .....           | .....       |
| <i>P.reichenowi</i>   | .....T..... | .....T..... | .....C..... | .....T..... | .....CAT..... | .....TG.T..... | .....AGT.T..... | .....G..... |

|                       | 1050        | 1060                 | 1070       | 1080       | 1090        | 1100       | 1110            | 1120       |
|-----------------------|-------------|----------------------|------------|------------|-------------|------------|-----------------|------------|
| PF10_0346_3D7         | AAAAAAGAA   | GAAAAAACC            | CAGACAATGA | AATTACAAAT | GAAGTTAAAG  | AGGAACAAAA | ATATAGTTCA      | CCAAGTGATA |
| PF10_0346_K1_AY518890 | .....       | .....                | .....      | .....      | .....       | .....      | .....           | .....      |
| 3D7                   | .....       | .....                | .....      | .....      | .....       | .....      | .....           | .....      |
| RO33                  | .....       | .....                | .....      | .....      | .....       | .....      | .....           | .....      |
| Palo Alto             | .....       | .....                | .....      | .....      | .....       | .....      | .....           | .....      |
| FCR3                  | .....       | .....                | .....      | .....      | .....       | .....      | .....           | .....      |
| Wellcome              | .....       | .....                | .....      | .....      | .....       | .....      | .....           | .....      |
| D6                    | .....       | .....                | .....      | .....      | .....       | .....      | .....           | .....      |
| T996                  | .....       | .....                | .....      | .....      | .....       | .....      | .....           | .....      |
| T9102                 | .....       | .....                | .....      | .....      | .....       | .....      | .....           | .....      |
| K1                    | .....       | .....                | .....      | .....      | .....       | .....      | .....           | .....      |
| Dd2                   | .....       | .....                | .....      | .....      | .....       | .....      | .....           | .....      |
| D10                   | .....       | .....                | .....      | .....      | .....       | .....      | .....           | .....      |
| FCC2                  | .....       | .....                | .....      | .....      | .....       | .....      | .....           | .....      |
| 7G8                   | .....       | .....                | .....      | .....      | .....       | .....      | .....           | .....      |
| HB3                   | .....       | .....                | .....      | .....      | .....       | .....      | .....           | .....      |
| <i>P.reichenowi</i>   | .....C..... | .....C- --.A..A..... | .....      | .....      | .....G..... | .....      | .....GA..A..... | .....      |

|                       | 1130       | 1140       | 1150        | 1160        | 1170       | 1180       | 1190       | 1200       |
|-----------------------|------------|------------|-------------|-------------|------------|------------|------------|------------|
| PF10_0346_3D7         | TAAATGCCCA | AAATTTAATT | TCTAATAAGA  | ATAAAAAGAA  | TGATGAAACA | AAAAAGACTG | CTGAAAATAT | AGTTAAAACA |
| PF10_0346_K1_AY518890 | .....      | .....      | .....       | .....       | .....      | .....      | .....      | .....      |
| 3D7                   | .....      | .....      | .....       | .....       | .....      | .....      | .....      | .....      |
| RO33                  | .....      | .....      | .....       | .....T..... | .....      | .....      | .....      | .....      |
| Palo Alto             | .....      | .....      | .....       | .....       | .....      | .....      | .....      | .....      |
| FCR3                  | .....      | .....      | .....       | .....       | .....      | .....      | .....      | .....      |
| Wellcome              | .....      | .....      | .....       | .....       | .....      | .....      | .....      | .....      |
| D6                    | .....      | .....      | .....       | .....       | .....      | .....      | .....      | .....      |
| T996                  | .....      | .....      | .....       | .....       | .....      | .....      | .....      | .....      |
| T9102                 | .....      | .....      | .....       | .....       | .....      | .....      | .....      | .....      |
| K1                    | .....      | .....      | .....       | .....       | .....      | .....      | .....      | .....      |
| Dd2                   | .....      | .....      | .....       | .....       | .....      | .....      | .....      | .....      |
| D10                   | .....      | .....      | .....       | .....       | .....      | .....      | .....      | .....      |
| FCC2                  | .....      | .....      | .....       | .....       | .....      | .....      | .....      | .....      |
| 7G8                   | .....      | .....      | .....       | .....       | .....      | .....      | .....      | .....      |
| HB3                   | .....      | .....      | .....       | .....       | .....      | .....      | .....      | .....      |
| <i>P.reichenowi</i>   | .....      | .....      | .....C..... | .....       | .....      | .....      | .....      | .....      |

|                       | 1210      | 1220          | 1230        | 1240       | 1250       | 1260       | 1270       | 1280      |
|-----------------------|-----------|---------------|-------------|------------|------------|------------|------------|-----------|
| PF10_0346_3D7         | TTGTTGGAT | TATTTAATGA    | AAAAAATGAG  | ATAGATTCTA | CTATAAATAA | TTTAGTACAA | GAAATGATCC | ATCTATTAG |
| PF10_0346_K1_AY518890 | .....     | .....         | .....       | .....      | .....      | .....      | .....      | .....     |
| 3D7                   | .....     | .....         | .....       | .....      | .....      | .....      | .....      | .....     |
| RO33                  | .....     | .....         | .....       | .....      | .....      | .....      | .....      | .....     |
| Palo Alto             | .....     | .....         | .....       | .....      | .....      | .....      | .....      | .....     |
| FCR3                  | .....     | .....         | .....       | .....      | .....      | .....      | .....      | .....     |
| Wellcome              | .....     | .....         | .....       | .....      | .....      | .....      | .....      | .....     |
| D6                    | .....     | .....         | .....       | .....      | .....      | .....      | .....      | .....     |
| T996                  | .....     | .....         | .....       | .....      | .....      | .....      | .....      | .....     |
| T9102                 | .....     | .....         | .....       | .....      | .....      | .....      | .....      | .....     |
| K1                    | .....     | .....         | .....       | .....      | .....      | .....      | .....      | .....     |
| Dd2                   | .....     | .....         | .....       | .....      | .....      | .....      | .....      | .....     |
| D10                   | .....     | .....         | .....       | .....      | .....      | .....      | .....      | .....     |
| FCC2                  | .....     | .....         | .....       | .....      | .....      | .....      | .....      | .....     |
| 7G8                   | .....     | .....         | .....       | .....      | .....      | .....      | .....      | .....     |
| HB3                   | .....     | .....         | .....       | .....      | .....      | .....      | .....      | .....     |
| <i>P.reichenowi</i>   | .....     | .....C.G..... | .....C..... | .....      | .....      | .....      | .....      | .....     |



|                     | 250         | 260         | 270        | 280         | 290        | 300        | 310         | 320         |
|---------------------|-------------|-------------|------------|-------------|------------|------------|-------------|-------------|
| PF10_0347           | ACTGGGGTTG  | AAAGTGTA    | AGCTATTGAT | GGGGAAAGTG  | GTACTTCAAT | GGATTCTAAA | CCTAAAGAGA  | ATAAAATTAG  |
| 3D7                 | .....       | .....       | .....      | .....       | .....      | .....      | .....       | .....       |
| RO33                | .....       | .....       | .....      | .....       | .....      | .....      | .....       | .....       |
| Palo Alto           | .....       | .....       | .....      | .....       | .....      | .....      | .....       | .....       |
| FCR3                | .....       | .....       | .....      | .....       | .....      | .....      | .....       | .....       |
| Wellcome            | .....       | .....       | .....      | .....       | .....      | .....      | .....       | .....       |
| D6                  | .....       | .....       | .....      | .....       | .....      | .....      | .....       | .....       |
| T996                | .....       | .....       | .....      | .....       | .....      | .....      | .....       | .....       |
| T9102               | .....       | .....       | .....      | .....       | .....      | .....      | .....       | .....       |
| K1                  | .....       | .....       | .....      | .....       | .....      | .....      | .....       | .....       |
| Dd2                 | .....       | .....       | .....      | .....       | .....      | .....      | .....       | .....       |
| D10                 | .....       | .....       | .....      | .....       | .....      | .....      | .....       | .....       |
| FCC2                | .....       | .....       | .....      | .....       | .....      | .....      | .....       | .....       |
| HB3                 | .....       | .....       | .....      | .....       | C.....     | .....      | .....       | .....       |
| 7G8                 | .....       | .....       | .....      | .....       | C.....     | .....      | .....       | .....       |
| <i>P.reichenowi</i> | .....C..... | .....C..... | .....      | .....A..... | .....      | .....      | .....G..... | .....A..... |

|                     | 330        | 340           | 350         | 360         | 370        | 380        | 390        | 400          |
|---------------------|------------|---------------|-------------|-------------|------------|------------|------------|--------------|
| PF10_0347           | TACTGAACCA | GGAGCAGACC    | AGGTGTCTAT  | TGGATTGGTC  | AACGAATCTG | ATAGTAGTTT | AGAAAATGAT | AAAAAAAAAA   |
| 3D7                 | .....      | .....         | .....       | .....       | .....      | .....      | .....      | .....        |
| RO33                | .....      | .....         | .....       | .....       | .....      | .....      | .....      | .....        |
| Palo Alto           | .....      | .....         | .....       | .....       | .....      | .....      | .....      | .....        |
| FCR3                | .....      | .....         | .....       | .....       | .....      | .....      | .....      | .....        |
| Wellcome            | .....      | .....         | .....       | .....       | .....      | .....      | .....      | .....        |
| D6                  | .....      | .....         | .....       | .....       | .....      | .....      | .....      | .....        |
| T996                | .....      | .....         | .....       | .....       | .....      | .....      | .....      | .....        |
| T9102               | .....      | .....         | .....       | .....       | .....      | .....      | .....      | .....        |
| K1                  | .....      | .....         | .....       | .....       | .....      | .....      | .....      | .....        |
| Dd2                 | .....      | .....         | .....       | .....       | .....      | .....      | .....      | .....        |
| D10                 | .....      | .....         | .....       | .....       | .....      | .....      | .....      | .....        |
| FCC2                | .....      | .....         | .....       | .....       | .....      | .....      | .....      | .....        |
| HB3                 | .....      | .....         | .....       | .....       | .....      | .....      | .....      | .....        |
| 7G8                 | .....      | .....         | .....       | .....       | .....      | .....      | .....      | .....        |
| <i>P.reichenowi</i> | .....      | .....T.G..... | .....A..... | .....A..... | .....      | .....      | .....      | .....GG..... |

|                     | 410        | 420       | 430        | 440         | 450        | 460        | 470        | 480        |
|---------------------|------------|-----------|------------|-------------|------------|------------|------------|------------|
| PF10_0347           | AAGAAAACGT | AAAAAAGAA | ATGCTTGGTA | CTGAAAAGGA  | AGGTTCTCCA | GATAGTCATG | ATAGTTCTAA | GGAAAAATTA |
| 3D7                 | .....      | .....     | .....      | .....       | .....      | .....      | .....      | .....      |
| RO33                | .....      | .....     | .....      | .....       | .....      | .....      | .....      | .....      |
| Palo Alto           | .....      | .....     | .....      | .....       | .....      | .....      | .....      | .....      |
| FCR3                | .....      | .....     | .....      | .....       | .....      | .....      | .....      | .....      |
| Wellcome            | .....      | .....     | .....      | .....       | .....      | .....      | .....      | .....      |
| D6                  | .....      | .....     | .....      | .....       | .....      | .....      | .....      | .....      |
| T996                | .....      | .....     | .....      | .....       | .....      | .....      | .....      | .....      |
| T9102               | .....      | .....     | .....      | .....       | .....      | .....      | .....      | .....      |
| K1                  | .....      | .....     | .....      | .....       | .....      | .....      | .....      | .....      |
| Dd2                 | .....      | .....     | .....      | .....       | .....      | .....      | .....      | .....      |
| D10                 | .....      | .....     | .....      | .....       | .....      | .....      | .....      | .....      |
| FCC2                | .....      | .....     | .....      | .....       | .....      | .....      | .....      | .....      |
| HB3                 | .....      | .....     | .....      | .....       | .....      | .....      | .....      | .....      |
| 7G8                 | .....      | .....     | .....      | .....       | .....      | .....      | .....      | .....      |
| <i>P.reichenowi</i> | .....      | .....     | .....      | .....T..... | .....      | .....      | .....      | .....      |

|                     | 490        | 500         | 510        | 520        | 530         | 540        | 550         | 560        |
|---------------------|------------|-------------|------------|------------|-------------|------------|-------------|------------|
| PF10_0347           | AATCTTAACG | ACAATTCCAA  | ATGGTCTGAT | TTTCTTAAAA | ATATCGTAAC  | GTTTGGTGGT | TTTGGTCCTA  | CTGTGGTTCA |
| 3D7                 | .....      | .....       | .....      | .....      | .....       | .....      | .....       | .....      |
| RO33                | .....      | .....       | .....      | .....      | .....       | .....      | .....       | .....      |
| Palo Alto           | .....      | .....       | .....      | .....      | .....       | .....      | .....       | .....      |
| FCR3                | .....      | .....       | .....      | .....      | .....G..... | .....      | .....       | .....      |
| Wellcome            | .....      | .....       | .....      | .....      | .....G..... | .....      | .....       | .....      |
| D6                  | .....      | .....       | .....      | .....      | .....       | .....      | .....       | .....      |
| T996                | .....      | .....       | .....      | .....      | .....       | .....      | .....       | .....      |
| T9102               | .....      | .....       | .....      | .....      | .....       | .....      | .....       | .....      |
| K1                  | .....      | .....       | .....      | .....      | .....       | .....      | .....       | .....      |
| Dd2                 | .....      | .....       | .....      | .....      | .....       | .....      | .....       | .....      |
| D10                 | .....      | .....       | .....      | .....      | .....G..... | .....      | .....       | .....      |
| FCC2                | .....      | .....       | .....      | .....      | .....       | .....      | .....       | .....      |
| HB3                 | .....      | .....       | .....      | .....      | .....       | .....      | .....       | .....      |
| 7G8                 | .....      | .....       | .....      | .....      | .....       | .....      | .....       | .....      |
| <i>P.reichenowi</i> | .....      | .....T..... | .....      | .....      | .....T..... | .....      | .....T..... | .....      |









|                     | 250       | 260         | 270          | 280        | 290        | 300         | 310        | 320        |
|---------------------|-----------|-------------|--------------|------------|------------|-------------|------------|------------|
| PF10_0348           | GTGGACAAG | ATGTGCCTAT  | TACATCGGTA   | TATTCTTCTA | AAATTATAAA | TGCTAATGAT  | TTAGAAGGAA | ATAGTATTGA |
| 3D7                 | .....     | .....       | .....        | .....      | .....      | .....       | .....      | .....      |
| RO33                | .....     | .....       | .....        | G.....     | .....      | .....       | .....      | .....      |
| Palo Alto           | .....     | .....       | .....        | G.....     | .....      | .....       | .....      | .....      |
| FCR3                | .....     | .....       | .....        | G.....     | .....      | .....       | .....      | .....      |
| Wellcome            | .....     | .....       | .....        | G.....     | .....      | .....       | .....      | .....      |
| D6                  | .....     | .....       | .....        | G.....     | .....      | .....       | .....      | .....      |
| T996                | .....     | .....       | .....        | G.....     | .....      | .....       | .....      | .....      |
| T9102               | .....     | .....       | .....        | G.....     | .....      | .....       | .....      | .....      |
| K1                  | .....     | .....       | .....        | G.....     | .....      | .....       | .....      | .....      |
| Dd2                 | .....     | .....       | .....        | G.....     | .....      | .....       | .....      | .....      |
| D10                 | .....     | .....       | .....        | G.....     | .....      | .....       | .....      | .....      |
| FCC2                | .....     | .....       | .....        | G.....     | .....      | .....       | .....      | .....      |
| HB3                 | .....     | .....       | .....        | G.....     | .....      | .....       | .....      | .....      |
| 7G8                 | .....     | .....       | .....        | G.....     | .....      | .....       | .....      | .....      |
| <i>P.reichenowi</i> | .....     | .....C..... | .....GC..... | .....      | .....      | .....C..... | .....      | .....      |

|                     | 330        | 340        | 350        | 360        | 370        | 380        | 390        | 400         |
|---------------------|------------|------------|------------|------------|------------|------------|------------|-------------|
| PF10_0348           | CGATACTAAA | GGTCTTAGTG | TTACTAATAG | TGGATTGATG | GATGGTAGTG | CTTTTGGTGG | TGGACTCCCT | TTTCTGGTT   |
| 3D7                 | .....      | .....      | .....      | .....      | .....      | .....      | .....      | .....       |
| RO33                | .....      | .....      | .....      | .....      | .....      | .....      | .....      | .....       |
| Palo Alto           | .....      | .....      | .....      | .....      | .....      | .....      | .....      | .....       |
| FCR3                | .....      | .....      | .....      | .....      | .....      | .....      | .....      | .....       |
| Wellcome            | .....      | .....      | .....      | .....      | .....      | .....      | .....      | .....       |
| D6                  | .....      | .....      | .....      | .....      | .....      | .....      | .....      | .....       |
| T996                | .....      | .....      | .....      | .....      | .....      | .....      | .....      | .....       |
| T9102               | .....      | .....      | .....      | .....      | .....      | .....      | .....      | .....       |
| K1                  | .....      | .....      | .....      | .....      | .....      | .....      | .....      | .....       |
| Dd2                 | .....      | .....      | .....      | .....      | .....      | .....      | .....      | .....       |
| D10                 | .....      | .....      | .....      | .....      | .....      | .....      | .....      | .....       |
| FCC2                | .....      | .....      | .....      | .....      | .....      | .....      | .....      | .....       |
| HB3                 | .....      | .....      | .....      | .....      | .....      | .....      | .....      | .....       |
| 7G8                 | .....      | .....      | .....      | .....      | .....      | .....      | .....      | .....       |
| <i>P.reichenowi</i> | TA.....    | .....      | .....      | .....      | .....      | .....      | .....      | .....G..... |

|                     | 410       | 420        | 430        | 440          | 450       | 460               | 470                | 480         |
|---------------------|-----------|------------|------------|--------------|-----------|-------------------|--------------------|-------------|
| PF10_0348           | ATTCTCTCT | ACAAGGAAAT | CATAATAAAT | GTCCTGATGA   | AAATTTTGT | AAGGGTATTA        | AAAATGTCTT         | ATCCTGTCCT  |
| 3D7                 | .....     | .....      | .....      | .....        | .....     | .....             | .....              | .....       |
| RO33                | .....     | .....      | .....      | .....        | .....     | .....             | .....C.....        | .....       |
| Palo Alto           | .....     | .....      | .....      | .....A.....  | .....     | .....T.....C..... | .....GCC TAAT..... | .....       |
| FCR3                | .....     | .....      | .....      | .....        | .....     | .....             | .....              | .....       |
| Wellcome            | .....     | .....      | .....      | .....        | .....     | .....             | .....              | .....       |
| D6                  | .....     | .....      | .....      | .....A.....  | .....     | .....T.....C..... | .....GCC TAAT..... | .....       |
| T996                | .....     | .....      | .....      | .....        | .....     | .....             | .....              | .....       |
| T9102               | .....     | .....      | .....      | .....        | .....     | .....             | .....C.....        | .....       |
| K1                  | .....     | .....      | .....      | .....        | .....     | .....             | .....C.....        | .....       |
| Dd2                 | .....     | .....      | .....      | .....        | .....     | .....             | .....C.....        | .....       |
| D10                 | .....     | .....      | .....      | .....        | .....     | .....             | .....C.....        | .....       |
| FCC2                | .....     | .....      | .....      | .....        | .....     | .....             | .....              | .....       |
| HB3                 | .....     | .....      | .....      | .....A.....  | .....     | .....T.....C..... | .....GCC TAAT..... | .....       |
| 7G8                 | .....     | .....      | .....      | .....A.....  | .....     | .....T.....C..... | .....GCC TAAT..... | .....       |
| <i>P.reichenowi</i> | .....     | .....      | .....      | .....AG..... | .....     | .....G.....       | .....C.....        | .....T..... |

|                     | 490               | 500                | 510               | 520            | 530                    | 540                | 550            | 560         |
|---------------------|-------------------|--------------------|-------------------|----------------|------------------------|--------------------|----------------|-------------|
| PF10_0348           | CCAAAAAATT        | CTACTGGTAG         | AAATGGGGAT        | TGGATTAGTG     | TGGCTGTAA              | AGAAAGTTCA         | ACTACAAATA     | AAGGTGTTCT  |
| 3D7                 | .....             | .....              | .....             | .....          | .....                  | .....              | .....          | .....       |
| RO33                | .....             | .....              | .....             | .....          | .....A.....            | .....              | .....          | .....       |
| Palo Alto           | .....T.....       | .....TC.....C..... | .....A.....T..... | .....GC.....CT | .....CAAA.....C.G..... | .....A.TTTC.T..... | .....AGTT..... | .....C..... |
| FCR3                | .....             | .....              | .....             | .....          | .....                  | .....              | .....          | .....       |
| Wellcome            | .....             | .....              | .....             | .....          | .....                  | .....              | .....          | .....       |
| D6                  | .....T.....       | .....TC.....C..... | .....A.....T..... | .....GC.....CT | .....CAAA.....C.G..... | .....A.TTTC.T..... | .....AGTT..... | .....C..... |
| T996                | .....             | .....              | .....             | .....          | .....                  | .....              | .....          | .....       |
| T9102               | .....             | .....              | .....             | .....          | .....                  | .....              | .....          | .....       |
| K1                  | .....             | .....              | .....             | .....          | .....                  | .....              | .....          | .....       |
| Dd2                 | .....             | .....              | .....             | .....          | .....                  | .....              | .....          | .....       |
| D10                 | .....             | .....              | .....             | .....          | .....                  | .....              | .....          | .....       |
| FCC2                | .....             | .....              | .....             | .....GC.....CT | .....CAAA.....C.G..... | .....A.TTTC.T..... | .....AGTT..... | .....C..... |
| HB3                 | .....T.....G..... | .....TC.....C..... | .....A.....T..... | .....GC.....CT | .....CAAA.....C.G..... | .....A.TTTC.T..... | .....AGTT..... | .....C..... |
| 7G8                 | .....T.....G..... | .....TC.....C..... | .....A.....T..... | .....GC.....CT | .....CAAA.....C.G..... | .....A.TTTC.T..... | .....AGTT..... | .....C..... |
| <i>P.reichenowi</i> | GA.....C.....     | .....T.....        | .....             | .....          | .....A.....            | .....              | .....          | .....       |

|                     | 570        | 580        | 590        | 600        | 610        | 620        | 630        | 640        |
|---------------------|------------|------------|------------|------------|------------|------------|------------|------------|
| PF10_0348           | TGTTCCCCCC | AGAAGAACAA | AATTATGTCT | AAGA--AAT  | ATTAACAAGG | TTGGCATCG  | AATCAAAGAC | GAGAAAAATT |
| 3D7                 | .....      | .....      | .....      | .....      | .....      | .....      | .....      | .....      |
| RO33                | .....      | .....      | .....      | .....      | .....      | .....      | .....      | .....      |
| Palo Alto           | .....A     | .....A.C   | ..A.G...T  | T...ATT... | ..A....TT  | ..CCTG.ATT | ..AA...ACT | ..AGGT..A. |
| FCR3                | .....      | .....      | .....      | .....      | .....      | .....      | .....      | .....      |
| Wellcome            | .....      | .....      | .....      | .....      | .....      | .....      | .....      | .....      |
| D6                  | .....A     | .....A.C   | ..A.G...T  | T...ATT... | ..A....TT  | ..CCTG.ATT | ..AA...ACT | ..AGGT..A. |
| T996                | .....      | .....A.    | .....      | .....      | .....C..   | .....      | .....      | .....      |
| T9102               | .....      | .....A.    | .....      | .....      | .....C..   | .....      | .....      | .....      |
| K1                  | .....      | .....      | .....      | .....      | .....      | .....      | .....      | .....      |
| Dd2                 | .....      | .....      | .....      | .....      | .....      | .....      | .....      | .....      |
| D10                 | .....      | .....      | .....      | .....      | .....      | .....      | .....      | .....      |
| FCC2                | .....A     | .....A.C   | ..A.G...T  | T...ATT... | ..A....TT  | ..CCTG.ATT | ..AA...ACT | ..AGGT..A. |
| HB3                 | .....A     | .....A.C   | ..A.G...T  | T...ATT... | ..A....TT  | ..CCTA.ATT | ..AA...ACT | ..AGGT..A. |
| 7G8                 | .....A     | .....A.C   | ..A.G...T  | T...ATT... | ..A....TT  | ..CCTA.ATT | ..AA...ACT | ..AGGT..A. |
| <i>P.reichenowi</i> | .....A     | .....G.    | .....      | ---        | ..C.C.TA   | .....T     | .....T.C.  | .....      |

|                     | 650        | 660        | 670        | 680        | 690        | 700        | 710        | 720         |
|---------------------|------------|------------|------------|------------|------------|------------|------------|-------------|
| PF10_0348           | TTAAAGAAGA | ATTTGTTAAA | GTTGCTTTAG | GAGAATCAAA | TGCTTTAATG | AAACATTATA | AAGAAAAAAA | TCTGAATGCC  |
| 3D7                 | .....      | .....      | .....      | .....      | .....      | .....      | .....      | .....       |
| RO33                | .....      | .....      | .....      | .....      | .....      | .....      | .....      | .....       |
| Palo Alto           | ..G..A.TTT | CA..TACTC. | TC...AGGTT | CT...G.T.. | ACAA.....A | ..TTA...G  | GTA.T..C.C | AGAA..A..A  |
| FCR3                | .....      | .....      | .....      | .....      | .....      | .....      | .....      | .....       |
| Wellcome            | .....      | .....      | .....      | .....      | .....      | .....      | .....      | .....       |
| D6                  | ..G..A.TTT | CA..TACTC. | TC...AGGTT | CT...G.T.. | ACAA.....A | ..TTA...G  | GTA.T..C.C | AGAA..A..A  |
| T996                | .....      | .....      | .....      | .....      | .....      | .....      | .....      | .....       |
| T9102               | .....      | .....      | .....      | .....      | .....      | .....      | .....      | .....       |
| K1                  | .....      | .....      | .....      | .....      | .....      | .....      | .....      | .....       |
| Dd2                 | .....      | .....      | .....      | .....      | .....      | .....      | .....      | .....       |
| D10                 | .....      | .....      | .....      | .....      | .....      | .....      | .....      | .....       |
| FCC2                | ..G..A.TTT | CA..TACTC. | TC...AGGTT | CT...G.T.. | ACAA.....A | ..TTA...G  | GTA.T..C.C | AGAA..A..A  |
| HB3                 | ..G..A.TTT | CA..TACTC. | TC...AGGTT | CT...G.T.. | ACAA.....A | ..TTA...G  | GTA.T..C.C | AGAA..A..A  |
| 7G8                 | ..G..A.TTT | CA..TACTC. | TC...AGGTT | CT...G.T.. | ACAA.....A | ..TTA...G  | GTA.T..C.C | AGAA..A..A  |
| <i>P.reichenowi</i> | .....A     | .....T     | .....A     | .....      | .....A     | .....T     | .....      | .....A..C.A |

|                     | 730        | 740         | 750        | 760        | 770        | 780        | 790        | 800        |
|---------------------|------------|-------------|------------|------------|------------|------------|------------|------------|
| PF10_0348           | CTTACAGCTA | TAAAAATATGG | ATTTTCAGAT | ATGGGAGATA | TAATAAAGGG | AACAGACCTA | ATTGACTATC | AAATTACTAA |
| 3D7                 | .....      | .....       | .....      | .....      | .....      | .....      | .....      | .....      |
| RO33                | .....      | .....       | .....      | .....      | .....      | .....      | .....      | .....      |
| Palo Alto           | ..CA...A   | .G.....     | T...G.C... | ..T...A... | .TG.CC.A.. | ..AT...A.G | ..A..TACA. | C..C.T...  |
| FCR3                | .....      | .....       | .....      | .....      | .....      | .....      | .....      | .....      |
| Wellcome            | .....      | .....       | .....      | .....      | .....      | .....      | .....      | .....      |
| D6                  | ..CA...A   | .G.....     | T...G.C... | ..T...A... | .TG.CC.A.. | ..AT...A.G | ..A..TACA. | C..C.T...  |
| T996                | .....      | .....       | .....      | .....      | .....      | .....      | .....      | .....      |
| T9102               | .....      | .....       | .....      | .....      | .....      | .....      | .....      | .....      |
| K1                  | .....      | .....       | .....      | .....      | .....      | .....      | .....      | .....      |
| Dd2                 | .....      | .....       | .....      | .....      | .....      | .....      | .....      | .....      |
| D10                 | .....      | .....       | .....      | .....      | .....      | .....      | .....      | .....      |
| FCC2                | ..CA...A   | .G.....     | T...G.C... | ..T...A... | .TG.CC.A.. | ..AT...A.G | ..A..TACA. | C..C.T...  |
| HB3                 | ..CA...A   | .G.....     | T...G.C... | ..T...A... | .TG.CC.A.. | ..AT...A.G | ..A..TACA. | C..C.T...  |
| 7G8                 | ..CA...A   | .G.....     | T...G.C... | ..T...A... | .TG.CC.A.. | ..AT...A.G | ..A..TACA. | C..C.T...  |
| <i>P.reichenowi</i> | .....      | .....       | .....      | .....      | .....      | .....T     | .....      | .....      |

|                     | 810        | 820        | 830        | 840        | 850        | 860        | 870        | 880        |
|---------------------|------------|------------|------------|------------|------------|------------|------------|------------|
| PF10_0348           | AAATATAAAT | AGGGCATTAG | ATAAAATATT | ACGTAATGAA | ACAAGTAAT- | --GACAAAAT | TAAAAAACGT | GTAGACTGGT |
| 3D7                 | .....      | .....      | .....      | .....      | .....      | .....      | .....      | .....      |
| RO33                | .....      | .....      | .....      | .....G     | .....      | .....      | .....      | .....      |
| Palo Alto           | T..A.C...A | .CATAT..G. | .AG..G..C. | CG.A..AC.  | TAT.AA...G | TTA.TG.TCC | A...G.TGC. | AA.AC....  |
| FCR3                | .....      | .....      | .....      | .....G     | .....      | .....      | .....      | .....      |
| Wellcome            | .....      | .....      | .....      | .....G     | .....      | .....      | .....      | .....      |
| D6                  | T..A.C...A | .CATAT..G. | .AG..G..C. | CG.A..AC.  | TAT.AA...G | TTA.TG.TCC | A...G.TGC. | AA.AC....  |
| T996                | .....      | .....      | .....      | .....G     | .....      | .....      | .....      | .....      |
| T9102               | .....      | .....      | .....      | .....G     | .....      | .....      | .....      | .....      |
| K1                  | .....      | .....      | .....      | .....G     | .....      | .....      | .....      | .....      |
| Dd2                 | .....      | .....      | .....      | .....G     | .....      | .....      | .....      | .....      |
| D10                 | .....      | .....      | .....      | .....G     | .....      | .....      | .....      | .....      |
| FCC2                | T..A.C...A | .CATAT..G. | .AG..G..C. | CG.A..AC.  | TAT.AA...G | TTA.TG.TCC | A...G.TGC. | AA.AC....  |
| HB3                 | T..A.C...A | .CATAT..G. | .AG..G..C. | CG.A..AC.  | TAT.AA...G | TTA.TG.TCC | A...G.TGC. | AA.AC....  |
| 7G8                 | T..A.C...A | .CATAT..G. | .AG..G..C. | CG.A..AC.  | TAT.AA...G | TTA.TG.TCC | A...G.TGC. | AA.AC....  |
| <i>P.reichenowi</i> | .....      | .....      | .....G     | .....GG    | .....-     | ---C.G     | .....A     | .....T     |





|                     | 1530       | 1540          | 1550        | 1560       | 1570        | 1580       | 1590       | 1600       |
|---------------------|------------|---------------|-------------|------------|-------------|------------|------------|------------|
| PF10_0348           | CAGATTAGAT | AATGTAAACT    | CTGTAAACGCA | AAGAGGAAAT | AATAACTACA  | ACAATAAATT | AGAGCGTGGA | TTGGGTCTGT |
| 3D7                 | .....      | .....         | .....       | .....      | .....       | .....      | .....      | .....      |
| RO33                | .....      | .....         | .....       | .....      | .....       | .....      | .....      | .....      |
| Palo Alto           | .....      | .....         | .....       | .....      | .....       | .....      | .....      | .....      |
| FCR3                | .....      | .....         | .....       | .....      | .....       | .....      | .....      | .....      |
| Wellcome            | .....      | .....         | .....       | .....      | .....       | .....      | .....      | .....      |
| D6                  | .....      | .....         | .....       | .....      | .....       | .....      | .....      | .....      |
| T996                | .....      | .....         | .....       | .....      | .....       | .....      | .....      | .....      |
| T9102               | .....      | .....         | .....       | .....      | .....       | .....      | .....      | .....      |
| K1                  | .....      | .....         | .....       | .....      | .....       | .....      | .....      | .....      |
| Dd2                 | .....      | .....         | .....       | .....      | .....       | .....      | .....      | .....      |
| D10                 | .....      | .....         | .....       | .....      | .....       | .....      | .....      | .....      |
| FCC2                | .....      | .....         | .....       | .....      | .....       | .....      | .....      | .....      |
| HB3                 | .....      | .....         | .....       | .....      | .....       | .....      | .....      | .....      |
| 7G8                 | .....      | .....         | .....       | .....      | .....       | .....      | .....      | .....      |
| <i>P.reichenowi</i> | T.T.....   | .....G.A..... | .....       | .....      | .....C..... | .....      | .....      | .....CA..  |

|                     | 1610      | 1620       | 1630       | 1640            | 1650       | 1660              | 1670       | 1680       |
|---------------------|-----------|------------|------------|-----------------|------------|-------------------|------------|------------|
| PF10_0348           | GTGCTCTCC | TGGTACAAAT | ATTATTACTG | AAGAAAAATA      | TTCTCTAGAA | TTAATAAAAT        | TAACATCAAA | GGATGAAGAA |
| 3D7                 | .....     | .....      | .....      | .....           | .....      | .....             | .....      | .....      |
| RO33                | .....     | .....      | .....      | .....           | .....      | .....             | .....      | .....      |
| Palo Alto           | .....     | .....      | .....      | .....           | .....      | .....             | .....      | .....      |
| FCR3                | .....     | .....      | .....      | .....           | .....      | .....             | .....      | .....      |
| Wellcome            | .....     | .....      | .....      | .....           | .....      | .....             | .....      | .....      |
| D6                  | .....     | .....      | .....      | .....           | .....      | .....             | .....      | .....      |
| T996                | .....     | .....      | .....      | .....           | .....      | .....             | .....      | .....      |
| T9102               | .....     | .....      | .....      | .....           | .....      | .....             | .....      | .....      |
| K1                  | .....     | .....      | .....      | .....           | .....      | .....             | .....      | .....      |
| Dd2                 | .....     | .....      | .....      | .....           | .....      | .....             | .....      | .....      |
| D10                 | .....     | .....      | .....      | .....           | .....      | .....             | .....      | .....      |
| FCC2                | .....     | .....      | .....      | .....           | .....      | .....             | .....      | .....      |
| HB3                 | .....     | .....      | .....      | .....           | .....      | .....             | .....      | .....      |
| 7G8                 | .....     | .....      | .....      | .....           | .....      | .....             | .....      | .....      |
| <i>P.reichenowi</i> | .....     | .....      | .....      | .....A.ACT..... | .....      | .....T.....T..... | .....      | .....      |

|                     | 1690        | 1700        | 1710       | 1720       | 1730       | 1740          | 1750       | 1760       |
|---------------------|-------------|-------------|------------|------------|------------|---------------|------------|------------|
| PF10_0348           | GATATTATAA  | AGCATAATGA  | GGATGTGAGA | GAAGAAATAG | AAGAACAACA | AGAAGACATC    | GAGGAAGATG | AAGAAGAATT |
| 3D7                 | .....       | .....       | .....      | .....      | .....      | .....         | .....      | .....      |
| RO33                | .....       | .....       | .....      | .....      | .....      | .....         | .....      | .....      |
| Palo Alto           | .....       | .....       | .....      | .....      | .....      | .....         | .....      | .....      |
| FCR3                | .....       | .....       | .....      | .....      | .....      | .....         | .....      | .....      |
| Wellcome            | .....       | .....       | .....      | .....      | .....      | .....         | .....      | .....      |
| D6                  | .....       | .....       | .....      | .....      | .....      | .....         | .....      | .....      |
| T996                | .....       | .....       | .....      | .....      | .....      | .....         | .....      | .....      |
| T9102               | .....       | .....       | .....      | .....      | .....      | .....         | .....      | .....      |
| K1                  | .....       | .....       | .....      | .....      | .....      | .....         | .....      | .....      |
| Dd2                 | .....       | .....       | .....      | .....      | .....      | .....         | .....      | .....      |
| D10                 | .....       | .....       | .....      | .....      | .....      | .....         | .....      | .....      |
| FCC2                | .....       | .....       | .....      | .....      | .....      | .....         | .....      | .....      |
| HB3                 | .....       | .....       | .....      | .....      | .....      | .....         | .....      | .....      |
| 7G8                 | .....       | .....       | .....      | .....      | .....      | .....         | .....      | .....      |
| <i>P.reichenowi</i> | .....C..... | .....A..... | .....      | .....      | .....      | .....A.A..... | .....      | .....      |

|                     | 1770        | 1780       | 1790       | 1800       | 1810       | 1820       | 1830       | 1840         |
|---------------------|-------------|------------|------------|------------|------------|------------|------------|--------------|
| PF10_0348           | GGAAAAATGAA | GGAGAAGAA- | -----      | -----      | -----      | -----      | -----      | -----ACAAAAG |
| 3D7                 | .....       | .....      | -----      | -----      | -----      | -----      | -----      | -----        |
| RO33                | .....       | .....      | -----      | -----      | -----      | -----      | -----      | -----        |
| Palo Alto           | .....       | .....      | -----      | -----      | -----      | -----      | -----      | -----        |
| FCR3                | .....       | .....      | -----      | -----      | -----      | -----      | -----      | -----        |
| Wellcome            | .....       | .....      | -----      | -----      | -----      | -----      | -----      | -----        |
| D6                  | .....       | .....      | -----      | -----      | -----      | -----      | -----      | -----        |
| T996                | .....       | .....      | -----      | -----      | -----      | -----      | -----      | -----        |
| T9102               | .....       | .....      | -----      | -----      | -----      | -----      | -----      | -----        |
| K1                  | .....       | .....      | -----      | -----      | -----      | -----      | -----      | -----        |
| Dd2                 | .....       | .....      | -----      | -----      | -----      | -----      | -----      | -----        |
| D10                 | .....       | .....      | -----      | -----      | -----      | -----      | -----      | -----        |
| FCC2                | .....       | .....      | -----      | -----      | -----      | -----      | -----      | -----        |
| HB3                 | .....       | .....      | -----      | -----      | -----      | -----      | -----      | -----        |
| 7G8                 | .....       | .....      | -----      | -----      | -----      | -----      | -----      | -----        |
| <i>P.reichenowi</i> | A.....      | .....C     | AACAAGAAGA | AATAGAGGAA | GATGAAGAAG | AATTGGAAAA | TGAAGGAGAA | GAA.....     |



**PF10\_0352**

|                     |            |           |            |            |           |            |            |             |
|---------------------|------------|-----------|------------|------------|-----------|------------|------------|-------------|
|                     | 10         | 20        | 30         | 40         | 50        | 60         | 70         | 80          |
| PF10_0352           | ATGAATAAGT | TTTGAATAT | TATATTTTAC | ATTTTCTCAA | TATTAATTT | CTCTTTCTTC | CAAAGCAATG | CCACAAGTAA  |
| 3D7                 | .....      | .....     | .....      | .....      | .....     | .....      | .....      | .....       |
| RO33                | .....      | .....     | .....      | .....      | .....     | .....      | .....      | .....       |
| Palo Alto           | .....      | .....     | .....      | .....      | .....     | .....      | .....      | .....       |
| FCR3                | .....      | .....     | .....      | .....      | .....     | .....      | .....      | .....       |
| Wellcome            | .....      | .....     | .....      | .....      | .....     | .....      | .....      | .....       |
| D6                  | .....      | .....     | .....      | .....      | .....     | .....      | .....      | .....       |
| T996                | .....      | .....     | .....      | .....      | .....     | .....      | .....      | .....       |
| T9102               | .....      | .....     | .....      | .....      | .....     | .....      | .....      | .....       |
| K1                  | .....      | .....     | .....      | .....      | .....     | .....      | .....      | .....       |
| Dd2                 | .....      | .....     | .....      | .....      | .....     | .....      | .....      | .....       |
| D10                 | .....      | .....     | .....      | .....      | .....     | .....      | .....      | .....       |
| FCC2                | .....      | .....     | .....      | .....      | .....     | .....      | .....      | .....       |
| HB3                 | .....      | .....     | .....      | .....      | .....     | .....      | .....      | .....       |
| 7G8                 | .....      | .....     | .....      | .....      | .....     | .....      | .....      | .....       |
| <i>P.reichenowi</i> | .....      | .....     | .....      | .....      | .....     | .....      | .....      | .....T..... |

|                     |                |            |            |             |            |            |            |             |
|---------------------|----------------|------------|------------|-------------|------------|------------|------------|-------------|
|                     | 90             | 100        | 110        | 120         | 130        | 140        | 150        | 160         |
| PF10_0352           | GGAAATTCAA     | AAAGATGAAC | AAAAGAATTT | AAGAAATGGT  | TCTTCAATAA | ATAATAACAA | AAATATAGAA | AATAAAAAATG |
| 3D7                 | .....          | .....      | .....      | .....       | .....      | .....      | .....      | .....       |
| RO33                | .....          | .....      | .....      | .....       | .....      | .....      | .....      | .....       |
| Palo Alto           | .....          | .....      | .....      | .....       | .....      | .....      | .....      | .....       |
| FCR3                | .....          | .....      | .....      | .....       | .....      | .....      | .....      | .....       |
| Wellcome            | .....          | .....      | .....      | .....       | .....      | .....      | .....      | .....       |
| D6                  | .....          | .....      | .....      | .....       | .....      | .....      | .....      | .....       |
| T996                | .....          | .....      | .....      | .....       | .....      | .....      | .....      | .....       |
| T9102               | .....          | .....      | .....      | .....       | .....      | .....      | .....      | .....       |
| K1                  | .....          | .....      | .....      | .....       | .....      | .....      | .....      | .....       |
| Dd2                 | .....          | .....      | .....      | .....       | .....      | .....      | .....      | .....       |
| D10                 | .....          | .....      | .....      | .....       | .....      | .....      | .....      | .....       |
| FCC2                | .....          | .....      | .....      | .....       | .....      | .....      | .....      | .....       |
| HB3                 | .....          | .....      | .....      | .....       | .....      | .....      | .....      | .....       |
| 7G8                 | .....          | .....      | .....      | .....       | .....      | .....      | .....      | .....       |
| <i>P.reichenowi</i> | .....A..G..... | .....      | .....      | .....T..... | .....      | .....---   | .....      | .....       |

|                     |             |            |             |            |             |             |            |             |
|---------------------|-------------|------------|-------------|------------|-------------|-------------|------------|-------------|
|                     | 170         | 180        | 190         | 200        | 210         | 220         | 230        | 240         |
| PF10_0352           | ATAATATTGA  | AACTCAATAT | GAAGCTTCAG  | AATATATAGA | AAAACAAAAT  | GACATTTTAA  | ATATGTATAA | TGATGAAAAA  |
| 3D7                 | .....       | .....      | .....       | .....      | .....       | .....       | .....      | .....       |
| RO33                | .....       | .....      | .....       | .....      | .....G..    | .....       | .....      | .....       |
| Palo Alto           | .....       | .....      | .....       | .....      | .....G..    | .....       | .....      | .....       |
| FCR3                | .....       | .....      | .....       | .....      | .....G..    | .....       | .....      | .....       |
| Wellcome            | .....       | .....      | .....       | .....      | .....G..    | .....       | .....      | .....       |
| D6                  | .....       | .....      | .....       | .....      | .....G..    | .....       | .....      | .....       |
| T996                | .....       | .....      | .....       | .....      | .....G..    | .....       | .....      | .....       |
| T9102               | .....       | .....      | .....       | .....      | .....G..    | .....       | .....      | .....       |
| K1                  | .....       | .....      | .....       | .....      | .....G..    | .....       | .....      | .....       |
| Dd2                 | .....       | .....      | .....       | .....      | .....G..    | .....       | .....      | .....       |
| D10                 | .....       | .....      | .....       | .....      | .....G..    | .....       | .....      | .....       |
| FCC2                | .....       | .....      | .....       | .....      | .....G..    | .....       | .....      | .....       |
| HB3                 | .....       | .....      | .....       | .....      | .....G..    | .....       | .....      | .....       |
| 7G8                 | .....       | .....      | .....       | .....      | .....G..    | .....       | .....      | .....       |
| <i>P.reichenowi</i> | .....G..... | .....      | .....C..... | .....      | .....G..... | .....T..... | .....      | .....G..... |

|                     |             |            |            |             |            |             |             |                |
|---------------------|-------------|------------|------------|-------------|------------|-------------|-------------|----------------|
|                     | 250         | 260        | 270        | 280         | 290        | 300         | 310         | 320            |
| PF10_0352           | GAGAAAAATA  | ATAATAATTC | ATTAGATACA | AATGTAACAA  | AAAATACTGT | AATTGATAAT  | TCAAATAAAT  | TTCAATCAAT     |
| 3D7                 | .....       | .....      | .....      | .....       | .....      | .....       | .....       | .....          |
| RO33                | .....       | .....      | .....      | .....       | .....      | .....       | .....       | .....          |
| Palo Alto           | .....       | .....      | .....      | .....       | .....      | .....       | .....       | .....          |
| FCR3                | .....       | .....      | .....      | .....       | .....      | .....       | .....       | .....          |
| Wellcome            | .....       | .....      | .....      | .....       | .....      | .....       | .....       | .....          |
| D6                  | .....       | .....      | .....      | .....       | .....      | .....       | .....       | .....          |
| T996                | .....       | .....      | .....      | .....       | .....      | .....       | .....       | .....          |
| T9102               | .....       | .....      | .....      | .....       | .....      | .....       | .....       | .....          |
| K1                  | .....       | .....      | .....      | .....       | .....      | .....       | .....       | .....          |
| Dd2                 | .....       | .....      | .....      | .....       | .....      | .....       | .....       | .....          |
| D10                 | .....       | .....      | .....      | .....       | .....      | .....       | .....       | .....          |
| FCC2                | .....       | .....      | .....      | .....       | .....      | .....       | .....       | .....          |
| HB3                 | .....       | .....      | .....      | .....       | .....      | .....       | .....       | .....          |
| 7G8                 | .....       | .....      | .....      | .....       | .....      | .....       | .....       | .....          |
| <i>P.reichenowi</i> | .....G..... | .....      | .....      | .....A..... | .....      | .....C..... | .....G..... | .....A..G..... |



|                     | 330        | 340        | 350        | 360       | 370        | 380       | 390       | 400        |
|---------------------|------------|------------|------------|-----------|------------|-----------|-----------|------------|
| PF10_0352           | TGAAGACAAT | AATGTATACA | ATAAAGGTAT | ATTGTAGGT | ACTGGGATAA | AATTAATGA | TTCACAACT | ACATCTGATA |
| 3D7                 | .....      | .....      | .....      | .....     | .....      | .....     | .....     | .....      |
| RO33                | .....      | .....      | .....      | .....     | .....      | .....     | .....     | .....      |
| Palo Alto           | .....      | .....      | .....      | .....     | .....      | .....     | .....     | .....      |
| FCR3                | .....      | .....      | .....      | .....     | .....      | .....     | .....     | .....      |
| Wellcome            | .....      | .....      | .....      | .....     | .....      | .....     | .....     | .....      |
| D6                  | .....      | .....      | .....      | .....     | .....      | .....     | .....     | .....      |
| T996                | .....      | .....      | .....      | .....     | .....      | .....     | .....     | .....      |
| T9102               | .....      | .....      | .....      | .....     | .....      | .....     | .....     | .....      |
| K1                  | .....      | .....      | .....      | .....     | .....      | .....     | .....     | .....      |
| Dd2                 | .....      | .....      | .....      | .....     | .....      | .....     | .....     | .....      |
| D10                 | .....      | .....      | .....      | .....     | .....      | .....     | .....     | .....      |
| FCC2                | .....      | .....      | .....      | .....     | .....      | .....     | .....     | .....      |
| HB3                 | .....      | .....      | .....      | .....     | .....      | .....     | .....     | .....      |
| 7G8                 | .....      | .....      | .....      | .....     | .....      | .....     | .....     | .....      |
| <i>P.reichenowi</i> | .....      | <b>T.G</b> | .....      | .....     | .....      | .....     | .....     | .....      |

|                     | 410       | 420        | 430        | 440        | 450        | 460        | 470        | 480        |
|---------------------|-----------|------------|------------|------------|------------|------------|------------|------------|
| PF10_0352           | ATTACAAAA | TGAACGATAT | CAAATAGACG | ATGAAAAATT | GAAGTATGGA | GGGTCGTTTG | ACACAATTTT | TTCAGGTTTT |
| 3D7                 | .....     | .....      | .....      | .....      | .....      | .....      | .....      | .....      |
| RO33                | .....     | .....      | .....      | .....      | .....      | .....      | .....      | .....      |
| Palo Alto           | .....     | .....      | .....      | .....      | .....      | .....      | .....      | .....      |
| FCR3                | .....     | .....      | .....      | .....      | .....      | .....      | .....      | .....      |
| Wellcome            | .....     | .....      | .....      | .....      | .....      | .....      | .....      | .....      |
| D6                  | .....     | .....      | .....      | .....      | .....      | .....      | .....      | .....      |
| T996                | .....     | .....      | .....      | .....      | .....      | .....      | .....      | .....      |
| T9102               | .....     | .....      | .....      | .....      | .....      | .....      | .....      | .....      |
| K1                  | .....     | .....      | .....      | .....      | .....      | .....      | .....      | .....      |
| Dd2                 | .....     | .....      | .....      | .....      | .....      | .....      | .....      | .....      |
| D10                 | .....     | .....      | .....      | .....      | .....      | .....      | .....      | .....      |
| FCC2                | .....     | .....      | .....      | .....      | .....      | .....      | .....      | .....      |
| HB3                 | .....     | .....      | .....      | .....      | .....      | .....      | .....      | .....      |
| 7G8                 | .....     | .....      | .....      | .....      | .....      | .....      | .....      | .....      |
| <i>P.reichenowi</i> | .....     | .....      | .....      | <b>A</b>   | <b>G</b>   | .....      | <b>A</b>   | .....      |

|                     | 490        | 500        | 510        | 520        | 530        | 540        | 550        | 560        |
|---------------------|------------|------------|------------|------------|------------|------------|------------|------------|
| PF10_0352           | GTTAATTTAT | TAACACCATC | AAGTCCTACT | CAAAACGATG | GATCTACAGG | AAGAAATGTA | CCACCTCCTA | GTGAACCTAA |
| 3D7                 | .....      | .....      | .....      | .....      | .....      | .....      | .....      | .....      |
| RO33                | .....      | .....      | .....      | .....      | .....      | .....      | .....      | .....      |
| Palo Alto           | .....      | .....      | .....      | .....      | .....      | .....      | .....      | .....      |
| FCR3                | .....      | .....      | .....      | .....      | .....      | .....      | .....      | .....      |
| Wellcome            | .....      | .....      | .....      | .....      | .....      | .....      | .....      | .....      |
| D6                  | .....      | .....      | .....      | .....      | .....      | .....      | .....      | .....      |
| T996                | .....      | .....      | .....      | .....      | .....      | .....      | .....      | .....      |
| T9102               | .....      | .....      | .....      | .....      | .....      | .....      | .....      | .....      |
| K1                  | .....      | .....      | .....      | .....      | .....      | .....      | .....      | .....      |
| Dd2                 | .....      | .....      | .....      | .....      | .....      | .....      | .....      | .....      |
| D10                 | .....      | .....      | .....      | .....      | .....      | .....      | .....      | .....      |
| FCC2                | .....      | .....      | .....      | .....      | .....      | .....      | .....      | .....      |
| HB3                 | .....      | .....      | .....      | .....      | .....      | .....      | .....      | .....      |
| 7G8                 | .....      | .....      | .....      | .....      | .....      | .....      | .....      | .....      |
| <i>P.reichenowi</i> | .....      | <b>A</b>   | <b>C.A</b> | <b>T</b>   | .....      | <b>C</b>   | <b>G</b>   | .....      |

|                     | 570        | 580         | 590        | 600        | 610        | 620        | 630        | 640        |
|---------------------|------------|-------------|------------|------------|------------|------------|------------|------------|
| PF10_0352           | TGTTGATACA | CCAGATCCCTC | CAACAGCACC | CGCACCTGTA | AAGGTACCTG | AAGATGCAAA | ATTATCAAGT | TCTCCTAGAC |
| 3D7                 | .....      | .....       | .....      | .....      | .....      | .....      | .....      | .....      |
| RO33                | .....      | .....       | .....      | .....      | .....      | .....      | .....      | .....      |
| Palo Alto           | .....      | .....       | .....      | .....      | .....      | .....      | .....      | .....      |
| FCR3                | .....      | .....       | .....      | .....      | .....      | .....      | .....      | .....      |
| Wellcome            | .....      | .....       | .....      | .....      | .....      | .....      | .....      | .....      |
| D6                  | .....      | .....       | .....      | .....      | .....      | .....      | .....      | .....      |
| T996                | .....      | .....       | .....      | .....      | .....      | .....      | .....      | .....      |
| T9102               | .....      | .....       | .....      | .....      | .....      | .....      | .....      | .....      |
| K1                  | .....      | .....       | .....      | .....      | .....      | .....      | .....      | .....      |
| Dd2                 | .....      | .....       | .....      | .....      | .....      | .....      | .....      | .....      |
| D10                 | .....      | .....       | .....      | .....      | .....      | .....      | .....      | .....      |
| FCC2                | .....      | .....       | .....      | .....      | .....      | .....      | .....      | .....      |
| HB3                 | .....      | .....       | .....      | .....      | .....      | .....      | .....      | .....      |
| 7G8                 | .....      | .....       | .....      | .....      | .....      | .....      | .....      | .....      |
| <i>P.reichenowi</i> | <b>G</b>   | <b>T</b>    | <b>AA</b>  | <b>T</b>   | .....      | <b>A</b>   | .....      | <b>C</b>   |

|                     | 650        | 660        | 670        | 680        | 690         | 700         | 710        | 720       |
|---------------------|------------|------------|------------|------------|-------------|-------------|------------|-----------|
| PF10_0352           | CTGAAGGACC | AAGAGCAAAC | AATAGAAATG | AAAATAATCA | AAATACAGAT  | CCATATAACC  | ACTATTTTGC | ATGGGAATT |
| 3D7                 | .....      | .....      | .....      | .....      | .....       | .....       | .....      | .....     |
| RO33                | .....      | .....      | .....      | .....      | .....       | .....       | .....      | .....     |
| Palo Alto           | .....      | .....      | .....      | .....      | .....       | .....       | .....      | .....     |
| FCR3                | .....      | .....      | .....      | .....      | .....       | .....       | .....      | .....     |
| Wellcome            | .....      | .....      | .....      | .....      | .....       | .....       | .....      | .....     |
| D6                  | .....      | .....      | .....      | .....      | .....       | .....       | .....      | .....     |
| T996                | .....      | .....      | .....      | .....      | .....       | .....       | .....      | .....     |
| T9102               | .....      | .....      | .....      | .....      | .....       | .....       | .....      | .....     |
| K1                  | .....      | .....      | .....      | .....      | .....       | .....       | .....      | .....     |
| Dd2                 | .....      | .....      | .....      | .....      | .....       | .....       | .....      | .....     |
| D10                 | .....      | .....      | .....      | .....      | .....       | .....       | .....      | .....     |
| FCC2                | .....      | .....      | .....      | .....      | .....       | .....       | .....      | .....     |
| HB3                 | .....      | .....      | .....      | .....      | .....       | .....       | .....      | .....     |
| 7G8                 | .....      | .....      | .....      | .....      | .....       | .....       | .....      | .....     |
| <i>P.reichenowi</i> | .....      | .....      | .....      | .....      | .....G..... | .....T..... | .....      | .....     |

|                     | 730         | 740        | 750         | 760        | 770        | 780        | 790          | 800         |
|---------------------|-------------|------------|-------------|------------|------------|------------|--------------|-------------|
| PF10_0352           | GGAGGTGGTG  | CTCCAACGTA | TAAACCCGAG  | AACAATAAGA | ACGATAATAT | TTTGCTAGAA | CACGTAAAAA   | TTACCTCGTG  |
| 3D7                 | .....       | .....      | .....       | .....      | .....      | .....      | .....        | .....       |
| RO33                | .....       | .....      | .....       | .....      | .....      | .....      | .....        | .....       |
| Palo Alto           | .....       | .....      | .....       | .....      | .....      | .....      | .....        | .....       |
| FCR3                | .....       | .....      | .....       | .....      | .....      | .....      | .....        | .....       |
| Wellcome            | .....       | .....      | .....       | .....      | .....      | .....      | .....        | .....       |
| D6                  | .....       | .....      | .....       | .....      | .....      | .....      | .....        | .....       |
| T996                | .....       | .....      | .....       | .....      | .....      | .....      | .....        | .....       |
| T9102               | .....       | .....      | .....       | .....      | .....      | .....      | .....        | .....       |
| K1                  | .....       | .....      | .....       | .....      | .....      | .....      | .....        | .....       |
| Dd2                 | .....       | .....      | .....       | .....      | .....      | .....      | .....        | .....       |
| D10                 | .....       | .....      | .....       | .....      | .....      | .....      | .....        | .....       |
| FCC2                | .....       | .....      | .....       | .....      | .....      | .....      | .....        | .....       |
| HB3                 | .....       | .....      | .....       | .....      | .....      | .....      | .....        | .....       |
| 7G8                 | .....       | .....      | .....       | .....      | .....      | .....      | .....        | .....       |
| <i>P.reichenowi</i> | .....C..... | .....      | .....A..... | .....      | .....      | .....      | .....AA..... | .....A..... |

|                     | 810        | 820        | 830         | 840         | 850               | 860        | 870            | 880               |
|---------------------|------------|------------|-------------|-------------|-------------------|------------|----------------|-------------------|
| PF10_0352           | GGATAAAGAA | GATATAATTA | AAGAAAATGA  | AGACACAAAA  | CGCGAAGTTC        | AAGAAACTGA | AGACACTGAC     | GAAACTGAAG        |
| 3D7                 | .....      | .....      | .....       | .....       | .....             | .....      | .....          | .....             |
| RO33                | .....      | .....      | .....       | .....       | .....             | .....      | .....          | .....             |
| Palo Alto           | .....      | .....      | .....       | .....       | .....             | .....      | .....          | .....             |
| FCR3                | .....      | .....      | .....T..... | .....       | .....             | .....      | .....          | .....             |
| Wellcome            | .....      | .....      | .....T..... | .....       | .....             | .....      | .....          | .....             |
| D6                  | .....      | .....      | .....       | .....       | .....             | .....      | .....          | .....             |
| T996                | .....      | .....      | .....       | .....       | .....             | .....      | .....          | .....             |
| T9102               | .....      | .....      | .....       | .....       | .....             | .....      | .....          | .....             |
| K1                  | .....      | .....      | .....       | .....       | .....             | .....      | .....          | .....             |
| Dd2                 | .....      | .....      | .....       | .....       | .....             | .....      | .....          | .....             |
| D10                 | .....      | .....      | .....       | .....       | .....             | .....      | .....          | .....             |
| FCC2                | .....      | .....      | .....       | .....       | .....             | .....      | .....          | .....             |
| HB3                 | .....      | .....      | .....       | .....       | .....             | .....      | .....          | .....             |
| 7G8                 | .....      | .....      | .....       | .....       | .....             | .....      | .....          | .....             |
| <i>P.reichenowi</i> | .....      | .....      | .....       | .....G..... | .....T.....A..... | .....      | .....C.TA..... | .....T.....C..... |

|                     | 890         | 900         | 910        | 920                | 930         | 940        | 950         | 960        |
|---------------------|-------------|-------------|------------|--------------------|-------------|------------|-------------|------------|
| PF10_0352           | ATACTGACGA  | AACTGAAGAA  | ACAGAAGATA | -----T             | GGAAGATGAA  | AACGAAATTG | TGGAAGATCA  | ATTACAAGAA |
| 3D7                 | .....       | .....       | .....      | .....              | .....       | .....      | .....       | .....      |
| RO33                | .....       | .....       | .....      | .....              | .....       | .....      | .....       | .....      |
| Palo Alto           | .....       | .....       | .....      | .....              | .....       | .....      | .....       | .....      |
| FCR3                | .....       | .....       | .....      | .....              | .....       | .....      | .....       | .....      |
| Wellcome            | .....       | .....       | .....      | .....              | .....       | .....      | .....       | .....      |
| D6                  | .....       | .....       | .....      | .....              | .....       | .....      | .....       | .....      |
| T996                | .....       | .....       | .....      | .....              | .....       | .....      | .....       | .....      |
| T9102               | .....       | .....       | .....      | .....              | .....       | .....      | .....       | .....      |
| K1                  | .....       | .....       | .....      | .....              | .....       | .....      | .....       | .....      |
| Dd2                 | .....       | .....       | .....      | .....              | .....       | .....      | .....       | .....      |
| D10                 | .....       | .....       | .....      | .....              | .....       | .....      | .....       | .....      |
| FCC2                | .....       | .....       | .....      | .....              | .....       | .....      | .....       | .....      |
| HB3                 | .....       | .....       | .....      | .....              | .....       | .....      | .....       | .....      |
| 7G8                 | .....       | .....       | .....      | .....              | .....       | .....      | .....       | .....      |
| <i>P.reichenowi</i> | .....A..... | .....A..... | .....      | .....ATTAGATA..... | .....A..... | .....      | .....G..... | .....      |

|                     | 970         | 980        | 990       | 1000       | 1010        | 1020        | 1030       | 1040       |
|---------------------|-------------|------------|-----------|------------|-------------|-------------|------------|------------|
| PF10_0352           | AATGAAGATG  | ATGAGGATAA | TGTAATTTA | GAAGATATTA | ATAAAAATAC  | TAGAAATGAT  | ATATTTGAAG | AACAAATAAA |
| 3D7                 | .....       | .....      | .....     | .....      | .....       | .....       | .....      | .....      |
| RO33                | .....       | .....      | .....     | .....      | .....       | .....       | .....      | .....      |
| Palo Alto           | .....       | .....      | .....     | .....      | .....       | .....       | .....      | .....      |
| FCR3                | .....       | .....      | .....     | .....      | .....       | .....       | .....      | .....      |
| Wellcome            | .....       | .....      | .....     | .....      | .....       | .....       | .....      | .....      |
| D6                  | .....       | .....      | .....     | .....      | .....       | .....       | .....      | .....      |
| T996                | .....       | .....      | .....     | .....      | .....       | .....       | .....      | .....      |
| T9102               | .....       | .....      | .....     | .....      | .....       | .....       | .....      | .....      |
| K1                  | .....       | .....      | .....     | .....      | .....       | .....       | .....      | .....      |
| Dd2                 | .....       | .....      | .....     | .....      | .....       | .....       | .....      | .....      |
| D10                 | .....       | .....      | .....     | .....      | .....       | .....       | .....      | .....      |
| FCC2                | .....       | .....      | .....     | .....      | .....       | .....       | .....      | .....      |
| HB3                 | .....       | .....      | .....     | .....      | .....       | .....       | .....      | .....      |
| 7G8                 | .....       | .....      | .....     | .....      | .....       | .....       | .....      | .....      |
| <i>P.reichenowi</i> | .....A..... | .....      | .....     | .....      | .....T..... | .....A..... | .....      | .....      |

|                     | 1050       | 1060       | 1070       | 1080       | 1090        | 1100       | 1110        | 1120        |
|---------------------|------------|------------|------------|------------|-------------|------------|-------------|-------------|
| PF10_0352           | ATTAGATTCT | ACGCAAGATG | ACAAAGCTCA | AAAATTAATT | TCTAATGAAT  | ATAAAAAAAC | TGAAGAAAAA  | AAATCATTAG  |
| 3D7                 | .....      | .....      | .....      | .....      | .....       | .....      | .....       | .....       |
| RO33                | .....      | .....      | .....      | .....      | .....       | .....      | .....       | .....       |
| Palo Alto           | .....      | .....      | .....      | .....      | .....       | .....      | .....       | .....       |
| FCR3                | .....      | .....      | .....      | .....      | .....       | .....      | .....       | .....       |
| Wellcome            | .....      | .....      | .....      | .....      | .....       | .....      | .....       | .....       |
| D6                  | .....      | .....      | .....      | .....      | .....       | .....      | .....       | .....       |
| T996                | .....      | .....      | .....      | .....      | .....       | .....      | .....       | .....       |
| T9102               | .....      | .....      | .....      | .....      | .....       | .....      | .....       | .....       |
| K1                  | .....      | .....      | .....      | .....      | .....       | .....      | .....       | .....       |
| Dd2                 | .....      | .....      | .....      | .....      | .....       | .....      | .....       | .....       |
| D10                 | .....      | .....      | .....      | .....      | .....       | .....      | .....       | .....       |
| FCC2                | .....      | .....      | .....      | .....      | .....       | .....      | .....       | .....       |
| HB3                 | .....      | .....      | .....      | .....      | .....       | .....      | .....       | .....       |
| 7G8                 | .....      | .....      | .....      | .....      | .....       | .....      | .....       | .....       |
| <i>P.reichenowi</i> | .....      | .....      | .....      | .....      | .....C..... | .....      | .....A..... | .....T..... |

|                     | 1130       | 1140       | 1150      | 1160       | 1170        | 1180       | 1190       | 1200       |
|---------------------|------------|------------|-----------|------------|-------------|------------|------------|------------|
| PF10_0352           | AAGATCATGT | AAATCTATTA | TTTAATTTT | TACAAACAAA | TAACCAACTA  | GATCCTTCAC | TAAAAGATTT | AGAAAATGAG |
| 3D7                 | .....      | .....      | .....     | .....      | .....       | .....      | .....      | .....      |
| RO33                | .....      | .....      | .....     | .....      | .....       | .....      | .....      | .....      |
| Palo Alto           | .....      | .....      | .....     | .....      | .....       | .....      | .....      | .....      |
| FCR3                | .....      | .....      | .....     | .....      | .....       | .....      | .....      | .....      |
| Wellcome            | .....      | .....      | .....     | .....      | .....       | .....      | .....      | .....      |
| D6                  | .....      | .....      | .....     | .....      | .....       | .....      | .....      | .....      |
| T996                | .....      | .....      | .....     | .....      | .....       | .....      | .....      | .....      |
| T9102               | .....      | .....      | .....     | .....      | .....       | .....      | .....      | .....      |
| K1                  | .....      | .....      | .....     | .....      | .....       | .....      | .....      | .....      |
| Dd2                 | .....      | .....      | .....     | .....      | .....       | .....      | .....      | .....      |
| D10                 | .....      | .....      | .....     | .....      | .....       | .....      | .....      | .....      |
| FCC2                | .....      | .....      | .....     | .....      | .....       | .....      | .....      | .....      |
| HB3                 | .....      | .....      | .....     | .....      | .....       | .....      | .....      | .....      |
| 7G8                 | .....      | .....      | .....     | .....      | .....       | .....      | .....      | .....      |
| <i>P.reichenowi</i> | .....      | .....      | .....     | .....      | .....G..... | .....      | .....      | .....      |

|                     | 1210       | 1220              |
|---------------------|------------|-------------------|
| PF10_0352           | TTAACTTTTT | TTTAAATAA CTATTGA |
| 3D7                 | .....      | .....             |
| RO33                | .....      | .....             |
| Palo Alto           | .....      | .....             |
| FCR3                | .....      | .....             |
| Wellcome            | .....      | .....             |
| D6                  | .....      | .....             |
| T996                | .....      | .....             |
| T9102               | .....      | .....             |
| K1                  | .....      | .....             |
| Dd2                 | .....      | .....             |
| D10                 | .....      | .....             |
| FCC2                | .....      | .....             |
| HB3                 | .....      | .....             |
| 7G8                 | .....      | .....             |
| <i>P.reichenowi</i> | .....      | .....             |





|                     | 650         | 660         | 670              | 680         | 690        | 700         | 710         | 720         |
|---------------------|-------------|-------------|------------------|-------------|------------|-------------|-------------|-------------|
| PF13_0197           | GAGAAATCGAC | ATTTCAAAAA  | GACCTAGATA       | AGAAATTATA  | TAATTTAGGA | GATGTTTTTA  | ATCATGTAGT  | TGATATTTCA  |
| 3D7                 | .....       | .....       | .....            | .....       | .....      | .....       | .....       | .....       |
| RO33                | .....       | .....G..... | .....T.....      | .....A..... | .....      | .....       | .....       | .....       |
| Palo Alto           | .....       | .....       | .....            | .....       | .....      | .....       | .....       | .....       |
| FCR3                | .....       | .....G..... | .....            | .....       | .....      | .....       | .....       | .....       |
| Wellcome            | .....       | .....G..... | .....            | .....       | .....      | .....       | .....       | .....       |
| D6                  | .....       | .....       | .....            | .....       | .....      | .....       | .....       | .....       |
| T996                | .....       | .....       | .....            | .....       | .....      | .....       | .....       | .....       |
| T9102               | .....       | .....G..... | .....            | .....       | .....      | .....       | .....       | .....       |
| K1                  | .....       | .....G..... | .....            | .....       | .....      | .....       | .....       | .....       |
| Dd2                 | .....       | .....       | .....T.....      | .....A..... | .....      | .....       | .....       | .....       |
| D10                 | .....       | .....       | .....            | .....       | .....      | .....       | .....       | .....       |
| FCC2                | .....       | .....       | .....            | .....       | .....      | .....       | .....       | .....       |
| HB3                 | .....       | .....G..... | .....T.....      | .....A..... | .....      | .....       | .....       | .....       |
| 7G8                 | .....       | .....       | .....            | .....       | .....      | .....       | .....       | .....       |
| <i>P.reichenowi</i> | C.A.....C.  | .....G..... | .....T.C.AC..... | .....       | .....      | .....G..... | .....A..... | .....C..... |

|                     | 730           | 740        | 750                 | 760          | 770         | 780        | 790        | 800        |
|---------------------|---------------|------------|---------------------|--------------|-------------|------------|------------|------------|
| PF13_0197           | AACAAAAAGA    | ACAAAATAAA | TCTCGATGAA          | TATGGTAAAA   | AATATACAGA  | TTTCAAAAAA | GAATATGAAG | ACTTCGTTTT |
| 3D7                 | .....         | .....      | .....               | .....        | .....       | .....      | .....      | .....      |
| RO33                | .....G.G..... | .....      | .....A.....         | .....G.....  | .....       | .....      | .....      | .....      |
| Palo Alto           | .....         | .....      | .....A.....A.....   | .....G.....  | .....       | .....      | .....      | .....      |
| FCR3                | .....G.....   | .....      | .....               | .....A.....  | .....       | .....      | .....      | .....      |
| Wellcome            | .....G.....   | .....      | .....               | .....A.....  | .....       | .....      | .....      | .....      |
| D6                  | .....         | .....      | .....               | C.....A..... | .....       | .....      | .....      | .....      |
| T996                | .....         | .....      | .....               | C.....A..... | .....       | .....      | .....      | .....      |
| T9102               | .....G.....   | .....      | .....               | .....A.....  | .....       | .....      | .....      | .....      |
| K1                  | .....G.G..... | .....      | .....A.....         | .....A.....  | .....       | .....      | .....      | .....      |
| Dd2                 | .....G.G..... | .....      | .....A.....         | .....G.....  | .....       | .....      | .....      | .....      |
| D10                 | .....G.....   | .....      | .....               | .....        | .....       | .....      | .....      | .....      |
| FCC2                | .....G.G..... | .....      | .....A.....         | .....G.....  | .....       | .....      | .....      | .....      |
| HB3                 | .....G.G..... | .....      | .....A.....         | .....G.....  | .....       | .....      | .....      | .....      |
| 7G8                 | .....         | .....      | .....               | .....        | .....       | .....      | .....      | .....      |
| <i>P.reichenowi</i> | .....G.A..... | .....      | .....A..AT.A.T..... | .....G.....  | .....C..... | .....      | .....      | .....      |

|                     | 810         | 820        | 830        | 840        | 850        | 860        | 870         | 880          |
|---------------------|-------------|------------|------------|------------|------------|------------|-------------|--------------|
| PF13_0197           | AAATTCCTAAA | GAATATGATA | TAATCAAAAA | TCTAATAATT | ATGTTTGGTC | AAGAAGATAA | TAAGAGTAAA  | AATGGCAAAA   |
| 3D7                 | .....       | .....      | .....      | .....      | .....      | .....      | .....       | .....        |
| RO33                | .....       | .....      | .....      | .....      | .....      | .....      | .....       | .....        |
| Palo Alto           | .....       | .....      | .....      | .....      | .....      | .....      | .....       | .....        |
| FCR3                | .....       | .....      | .....      | .....      | .....      | .....      | .....       | .....        |
| Wellcome            | .....       | .....      | .....      | .....      | .....      | .....      | .....       | .....        |
| D6                  | .....       | .....      | .....      | .....      | .....      | .....      | .....       | .....        |
| T996                | .....       | .....      | .....      | .....      | .....      | .....      | .....       | .....        |
| T9102               | .....       | .....      | .....      | .....      | .....      | .....      | .....       | .....        |
| K1                  | .....       | .....      | .....      | .....      | .....      | .....      | .....       | .....        |
| Dd2                 | .....       | .....      | .....      | .....      | .....      | .....      | .....       | .....        |
| D10                 | .....       | .....      | .....      | .....      | .....      | .....      | .....       | .....        |
| FCC2                | .....       | .....      | .....      | .....      | .....      | .....      | .....C..... | .....        |
| HB3                 | .....       | .....      | .....      | .....      | .....      | .....      | .....       | .....        |
| 7G8                 | .....       | .....      | .....      | .....      | .....      | .....      | .....       | .....        |
| <i>P.reichenowi</i> | .....       | .....      | .....      | .....      | .....      | .....      | .....T..... | .....AC..... |

|                     | 890               | 900         | 910         | 920        | 930         | 940                  | 950         | 960         |
|---------------------|-------------------|-------------|-------------|------------|-------------|----------------------|-------------|-------------|
| PF13_0197           | CGGATATTGT        | AAGTGAAGCT  | AAACATATGA  | CTGAAATTTT | CATAAAACTA  | TTTAAAGATA           | AGGAATACCA  | TGAACAATTT  |
| 3D7                 | .....             | .....       | .....       | .....      | .....       | .....                | .....       | .....       |
| RO33                | .....G.....       | .....       | .....       | T.....     | .....       | .....                | .....       | .....       |
| Palo Alto           | .....             | .....       | .....       | .....      | .....       | .....                | .....       | .....       |
| FCR3                | .....             | .....       | .....       | .....      | .....       | .....                | .....       | .....       |
| Wellcome            | .....             | .....       | .....       | .....      | .....       | .....                | .....       | .....       |
| D6                  | .....             | .....       | .....       | .....      | .....       | .....                | .....       | .....       |
| T996                | .....             | .....       | .....       | .....      | .....       | .....                | .....       | .....       |
| T9102               | .....             | .....       | .....       | .....      | .....       | .....                | .....       | .....       |
| K1                  | .....             | .....       | .....       | T.....     | .....       | .....                | .....       | .....       |
| Dd2                 | .....T.....       | .....       | .....       | T.....     | .....       | .....                | .....       | .....       |
| D10                 | .....T.....       | .....       | .....       | T.....     | .....       | .....                | .....       | .....       |
| FCC2                | .....             | .....       | .....       | T.....     | .....       | .....                | .....       | .....       |
| HB3                 | .....G.....       | .....       | .....       | T.....     | .....       | .....T.....          | .....       | .....       |
| 7G8                 | .....             | .....       | .....       | .....      | .....       | .....                | .....       | .....       |
| <i>P.reichenowi</i> | .....G.....T..... | .....G..... | .....A..... | .....      | .....T..... | .....AG.C.....G..... | .....A..... | .....C..... |



|                     | 170        | 180        | 190        | 200        | 210        | 220        | 230        | 240        |
|---------------------|------------|------------|------------|------------|------------|------------|------------|------------|
| PF13_0196           | TAGGTATGCA | AAATGATGTG | GAAGAAAATT | TAGATAATGG | AAAAAATGTG | TTAGAAGATG | AACATTTGGT | TATAGGCCAA |
| 3D7                 | .....      | .....      | .....      | .....      | .....      | .....      | .....      | .....      |
| RO33                | .....      | .....      | .....      | .....      | .....      | .....      | .....      | .....      |
| Palo Alto           | .....      | .....      | .....      | .....      | .....      | .....      | .....      | .....      |
| FCR3                | .....      | .....      | .....      | .....      | .....      | .....      | .....      | .....      |
| Wellcome            | .....      | .....      | .....      | .....      | .....      | .....      | .....      | .....      |
| D6                  | .....      | .....      | .....      | .....      | .....      | .....      | .....      | .....      |
| T996                | .....      | .....      | .....      | .....      | .....      | .....      | .....      | .....      |
| T9102               | .....      | .....      | .....      | .....      | .....      | .....      | .....      | .....      |
| K1                  | .....      | .....      | .....      | .....      | .....      | .....      | .....      | .....      |
| Dd2                 | .....      | .....      | .....      | .....      | .....      | .....      | .....      | .....      |
| D10                 | .....      | .....      | .....      | .....      | .....      | .....      | .....      | .....      |
| FCC2                | .....      | .....      | .....      | .....      | .....      | .....      | .....      | .....      |
| HB3                 | .....      | .....      | .....      | .....      | .....      | .....      | .....      | .....      |
| 7G8                 | .....      | .....      | .....      | .....      | .....      | .....      | .....      | .....      |
| <i>P.reichenowi</i> | ..A..A.    | ..C.....   | .....      | .....      | .....      | .....      | .....      | .....      |

|                     | 250        | 260        | 270        | 280        | 290        | 300        | 310        | 320        |
|---------------------|------------|------------|------------|------------|------------|------------|------------|------------|
| PF13_0196           | GAAGGACAAA | CCGACAATGA | GGGTCCTCAT | ACAGAAACTA | AACCTGAAAG | ATCTGTTGAA | TCAGGAGGTA | CAGGCGATAG |
| 3D7                 | .....      | .....      | .....      | .....      | .....      | .....      | .....      | .....      |
| RO33                | .....      | .....      | .....      | .....G     | .....      | .....      | .....      | .....      |
| Palo Alto           | .....      | .....      | .....      | .....G     | .....      | .....      | .....      | .....      |
| FCR3                | .....      | .....      | .....      | .....G     | .....      | .....      | .....      | .....      |
| Wellcome            | .....      | .....      | .....      | .....G     | .....      | .....      | .....      | .....      |
| D6                  | .....      | .....      | .....      | .....G     | .....      | .....      | .....      | .....      |
| T996                | .....      | .....      | .....      | .....G     | .....      | .....      | .....      | .....      |
| T9102               | .....      | .....      | .....      | .....G     | .....      | .....      | .....      | .....      |
| K1                  | .....      | .....      | .....      | .....G     | .....      | .....      | .....      | .....      |
| Dd2                 | .....      | .....      | .....      | .....G     | .....      | .....      | .....      | .....      |
| D10                 | .....      | .....      | .....      | .....G     | .....      | .....      | .....      | .....      |
| FCC2                | .....      | .....      | .....      | .....G     | .....      | .....      | .....      | .....      |
| HB3                 | .....      | .....      | .....      | .....G     | .....      | .....      | .....      | .....      |
| 7G8                 | .....      | .....      | .....      | .....G     | .....      | .....      | .....      | .....      |
| <i>P.reichenowi</i> | .....GA    | .....T     | .....A     | .....G     | .....T     | .....C     | .....G     | .....AC    |
|                     |            |            |            |            |            |            |            | .....T     |
|                     |            |            |            |            |            |            |            | .....C     |

|                     | 330        | 340        | 350        | 360        | 370        | 380        | 390        | 400        |
|---------------------|------------|------------|------------|------------|------------|------------|------------|------------|
| PF13_0196           | CGTTTCAAAT | CATGAATCGG | AATTACCAAG | AGATACAGAA | ACTCGTGAAG | TTGTAACAAC | AGTACAACCA | GGAACACAAT |
| 3D7                 | .....      | .....      | .....      | .....      | .....      | .....      | .....      | .....      |
| RO33                | .....      | .....      | .....      | .....      | .....      | .....      | .....      | .....      |
| Palo Alto           | .....      | .....      | .....      | .....      | .....      | .....      | .....      | .....      |
| FCR3                | .....      | .....      | .....      | .....      | .....      | .....      | .....      | .....      |
| Wellcome            | .....      | .....      | .....      | .....      | .....      | .....      | .....      | .....      |
| D6                  | .....      | .....      | .....      | .....      | .....      | .....      | .....      | .....      |
| T996                | .....      | .....      | .....      | .....      | .....      | .....      | .....      | .....      |
| T9102               | .....      | .....      | .....      | .....      | .....      | .....      | .....      | .....      |
| K1                  | .....      | .....      | .....      | .....      | .....      | .....      | .....      | .....      |
| Dd2                 | .....      | .....      | .....      | .....      | .....      | .....      | .....      | .....      |
| D10                 | .....      | .....      | .....      | .....      | .....      | .....      | .....      | .....      |
| FCC2                | .....      | .....      | .....      | .....      | .....      | .....      | .....      | .....      |
| HB3                 | .....      | .....      | .....      | .....      | .....      | .....      | .....      | .....      |
| 7G8                 | .....      | .....      | .....      | .....      | .....      | .....      | .....      | .....      |
| <i>P.reichenowi</i> | .....G     | .....G     | .....C     | .....C     | .....      | .....      | .....      | .....T     |

|                     | 410        | 420        | 430        | 440        | 450        | 460        | 470        | 480        |
|---------------------|------------|------------|------------|------------|------------|------------|------------|------------|
| PF13_0196           | TAGGAGAATC | AGGAGCAAAA | GAAACATTAG | AGTCACAAAC | ATCACCAGCA | CCACAGGGAA | CATCAGGATT | ACAAGGAGAA |
| 3D7                 | .....      | .....      | .....      | .....      | .....      | .....      | .....      | .....      |
| RO33                | .....      | .....      | .....      | .....      | .....      | .....      | .....      | .....      |
| Palo Alto           | .....      | .....      | .....      | .....      | .....      | .....      | .....      | .....      |
| FCR3                | .....      | .....      | .....      | .....      | .....      | .....      | .....      | .....      |
| Wellcome            | .....      | .....      | .....      | .....      | .....      | .....      | .....      | .....      |
| D6                  | .....      | .....      | .....      | .....      | .....      | .....      | .....      | .....      |
| T996                | .....      | .....      | .....      | .....      | .....      | .....      | .....      | .....      |
| T9102               | .....      | .....      | .....      | .....      | .....      | .....      | .....      | .....      |
| K1                  | .....      | .....      | .....      | .....      | .....      | .....      | .....      | .....      |
| Dd2                 | .....      | .....      | .....      | .....      | .....      | .....      | .....      | .....      |
| D10                 | .....      | .....      | .....      | .....      | .....      | .....      | .....      | .....      |
| FCC2                | .....      | .....      | .....      | .....      | .....      | .....      | .....      | .....      |
| HB3                 | .....      | .....      | .....      | .....      | .....      | .....      | .....      | .....      |
| 7G8                 | .....      | .....      | .....      | .....      | .....      | .....      | .....      | .....      |
| <i>P.reichenowi</i> | C.....     | .....A     | .....T     | .....T     | .....C     | .....GA    | .....G     | .....G     |



|                     | 490            | 500         | 510        | 520            | 530        | 540        | 550        | 560            |
|---------------------|----------------|-------------|------------|----------------|------------|------------|------------|----------------|
| PF13_0196           | AAGGTACCAG     | GTGCCATTATC | AAGTGTATCA | CAAACGTCTA     | GTCCCGATGT | ATCATCAAGA | TCTGAACAAC | CACAAACGAT     |
| 3D7                 | .....          | .....       | .....      | .....          | .....      | .....      | .....      | .....          |
| RO33                | .....          | .....       | .....      | .....          | .....      | .....      | .....      | .....          |
| Palo Alto           | .....          | .....       | .....      | .....          | .....      | .....      | .....      | .....          |
| FCR3                | .....          | .....       | .....      | .....          | .....      | .....      | .....      | .....          |
| Wellcome            | .....          | .....       | .....      | .....          | .....      | .....      | .....      | .....          |
| D6                  | .....          | .....       | .....      | .....          | .....      | .....      | .....      | .....          |
| T996                | .....          | .....       | .....      | .....          | .....      | .....      | .....      | .....          |
| T9102               | .....          | .....       | .....      | .....          | .....      | .....      | .....      | .....          |
| K1                  | .....          | .....       | .....      | .....          | .....      | .....      | .....      | .....          |
| Dd2                 | .....          | .....       | .....      | .....          | .....      | .....      | .....      | .....          |
| D10                 | .....          | .....       | .....      | .....          | .....      | .....      | .....      | .....          |
| FCC2                | .....          | .....       | .....      | .....          | .....      | .....      | .....      | .....          |
| HB3                 | .....          | .....       | .....      | .....          | .....      | .....      | .....      | .....          |
| 7G8                 | .....          | .....       | .....      | .....          | .....      | .....      | .....      | .....          |
| <i>P.reichenowi</i> | <b>G</b> ..... | .....       | .....      | <b>A</b> ..... | .....      | .....      | .....      | <b>G</b> ..... |

|                     | 570        | 580        | 590             | 600        | 610            | 620        | 630            | 640                    |
|---------------------|------------|------------|-----------------|------------|----------------|------------|----------------|------------------------|
| PF13_0196           | GCCAGAATCA | CCAAGACCAG | AAGGAACATC      | AACCGAATCA | CAACCAAGAG     | GATCGACAGA | ATCAGATGCA     | AGT-----A              |
| 3D7                 | .....      | .....      | .....           | .....      | .....          | .....      | .....          | -----                  |
| RO33                | .....      | .....      | .....           | .....      | .....          | .....      | .....          | -----                  |
| Palo Alto           | .....      | .....      | .....           | .....      | .....          | .....      | .....          | -----                  |
| FCR3                | .....      | .....      | .....           | .....      | .....          | .....      | .....          | -----                  |
| Wellcome            | .....      | .....      | .....           | .....      | .....          | .....      | .....          | -----                  |
| D6                  | .....      | .....      | .....           | .....      | .....          | .....      | .....          | -----                  |
| T996                | .....      | .....      | .....           | .....      | .....          | .....      | .....          | -----                  |
| T9102               | .....      | .....      | .....           | .....      | .....          | .....      | .....          | -----                  |
| K1                  | .....      | .....      | .....           | .....      | .....          | .....      | .....          | -----                  |
| Dd2                 | .....      | .....      | .....           | .....      | .....          | .....      | .....          | -----                  |
| D10                 | .....      | .....      | .....           | .....      | .....          | .....      | .....          | -----                  |
| FCC2                | .....      | .....      | .....           | .....      | .....          | .....      | .....          | -----                  |
| HB3                 | .....      | .....      | .....           | .....      | .....          | .....      | .....          | -----                  |
| 7G8                 | .....      | .....      | .....           | .....      | .....          | .....      | .....          | -----                  |
| <i>P.reichenowi</i> | .....      | .....      | <b>AC</b> ..... | .....      | <b>A</b> ..... | .....      | <b>C</b> ..... | <b>TC.GCAGAT</b> ..... |

|                     | 650        | 660       | 670        | 680       | 690        | 700        | 710        | 720            |
|---------------------|------------|-----------|------------|-----------|------------|------------|------------|----------------|
| PF13_0196           | ATAAAAATGG | TTCCCAAAC | AATGTTAGGA | CAATTTCAA | TTCTAGTAAT | AGTATCACAT | CTCCTCAAAC | GACACAACCT     |
| 3D7                 | .....      | .....     | .....      | .....     | .....      | .....      | .....      | .....          |
| RO33                | .....      | .....     | .....      | .....     | .....      | .....      | .....      | .....          |
| Palo Alto           | .....      | .....     | .....      | .....     | .....      | .....      | .....      | .....          |
| FCR3                | .....      | .....     | .....      | .....     | .....      | .....      | .....      | .....          |
| Wellcome            | .....      | .....     | .....      | .....     | .....      | .....      | .....      | .....          |
| D6                  | .....      | .....     | .....      | .....     | .....      | .....      | .....      | .....          |
| T996                | .....      | .....     | .....      | .....     | .....      | .....      | .....      | .....          |
| T9102               | .....      | .....     | .....      | .....     | .....      | .....      | .....      | .....          |
| K1                  | .....      | .....     | .....      | .....     | .....      | .....      | .....      | .....          |
| Dd2                 | .....      | .....     | .....      | .....     | .....      | .....      | .....      | .....          |
| D10                 | .....      | .....     | .....      | .....     | .....      | .....      | .....      | .....          |
| FCC2                | .....      | .....     | .....      | .....     | .....      | .....      | .....      | .....          |
| HB3                 | .....      | .....     | .....      | .....     | .....      | .....      | .....      | .....          |
| 7G8                 | .....      | .....     | .....      | .....     | .....      | .....      | .....      | .....          |
| <i>P.reichenowi</i> | .....      | .....     | .....      | .....     | .....      | .....      | .....      | <b>G</b> ..... |

|                     | 730            | 740        | 750        | 760        | 770        | 780        | 790            | 800        |
|---------------------|----------------|------------|------------|------------|------------|------------|----------------|------------|
| PF13_0196           | AGTAATAATC     | AAAATAATAC | AGTAAGTACA | ACCTCAGAAG | TGAAATATTT | AGATCTCCTT | TATGATGAAC     | TTCTTACAAA |
| 3D7                 | .....          | .....      | .....      | .....      | .....      | .....      | .....          | .....      |
| RO33                | .....          | .....      | .....      | .....      | .....      | .....      | .....          | .....      |
| Palo Alto           | .....          | .....      | .....      | .....      | .....      | .....      | .....          | .....      |
| FCR3                | .....          | .....      | .....      | .....      | .....      | .....      | .....          | .....      |
| Wellcome            | .....          | .....      | .....      | .....      | .....      | .....      | .....          | .....      |
| D6                  | .....          | .....      | .....      | .....      | .....      | .....      | .....          | .....      |
| T996                | .....          | .....      | .....      | .....      | .....      | .....      | .....          | .....      |
| T9102               | .....          | .....      | .....      | .....      | .....      | .....      | .....          | .....      |
| K1                  | .....          | .....      | .....      | .....      | .....      | .....      | .....          | .....      |
| Dd2                 | .....          | .....      | .....      | .....      | .....      | .....      | .....          | .....      |
| D10                 | .....          | .....      | .....      | .....      | .....      | .....      | .....          | .....      |
| FCC2                | .....          | .....      | .....      | .....      | .....      | .....      | .....          | .....      |
| HB3                 | .....          | .....      | .....      | .....      | .....      | .....      | .....          | .....      |
| 7G8                 | .....          | .....      | .....      | .....      | .....      | .....      | .....          | .....      |
| <i>P.reichenowi</i> | <b>G</b> ..... | .....      | .....      | .....      | .....      | .....      | <b>T</b> ..... | .....      |



```

          1130          1140
    ....|....| ....|....| ....|....
PF13_0196 ATGCAGTGGG TTTATTAAAT ACACTTTGA
3D7 .....
RO33 .....
Palo Alto .....
FCR3 .....
Wellcome .....
D6 .....
T996 .....
T9102 .....
K1 .....
Dd2 .....
D10 .....
FCC2 .....
HB3 .....
7G8 .....
P.reichenowi .....

```

**MRSP2**

```

          10          20          30          40          50          60          70          80
    ....|....| ....|....| ....|....| ....|....| ....|....| ....|....| ....|....|
MAL13P1.174 ATGAAGGGAC AAGCAATTTA TTTCTTTTTT GTTTCCTTAT ATTTCTCAA TTGTGTGGGG TGCAATTCAA AGAATAATAA
3D7 .....
RO33 .....
PALO ALTO .....
FCR3 .....
WELLCOME .....
D6 .....
T996 .....
T9102 .....
K1 .....
Dd2 .....
D10 .....
FCC2 .....
HB3 .....
7G8 .....
P.reichenowi ..... A.....T.....

```

```

          90          100          110          120          130          140          150          160
    ....|....| ....|....| ....|....| ....|....| ....|....| ....|....| ....|....|
MAL13P1.174 TAAGCGAACA AGTTATAATA AGAAAAAAGA AAACCTTAAA AATTCGATA ATATTGTTCT TGATGATTTT TATTCAGCGT
3D7 .....
RO33 .....
PALO ALTO .....
FCR3 .....
WELLCOME .....
D6 .....
T996 .....
T9102 .....
K1 .....
Dd2 .....
D10 .....
FCC2 .....
HB3 .....
7G8 .....
P.reichenowi ..... G..C..... A.

```

```

          170          180          190          200          210          220          230          240
    ....|....| ....|....| ....|....| ....|....| ....|....| ....|....| ....|....|
MAL13P1.174 TTGATTCCCA AGATAATTAT GAAAGTAAAT TAAAAAATA TGAGGATGAT ATTATCGGAC AAGGTATCTT TTCTCTTATA
3D7 .....
RO33 .....
PALO ALTO .....
FCR3 .....
WELLCOME .....
D6 .....
T996 .....
T9102 .....
K1 .....
Dd2 .....
D10 .....
FCC2 .....
HB3 .....
7G8 .....
P.reichenowi ..... T.....

```

|                     | 250        | 260        | 270        | 280        | 290        | 300        | 310        | 320        |
|---------------------|------------|------------|------------|------------|------------|------------|------------|------------|
| MAL13P1.174         | AGTAAAAAGA | ATCAAGAAAA | GGAAAAGTCA | TTAAAAGGGG | AATCAGAAGA | TAATACAAAA | CTTCAAGTAA | CCAAAGTCCA |
| 3D7                 | .....      | .....      | .....      | .....      | .....      | .....      | .....      | .....      |
| RO33                | .....      | .....      | .....      | .....      | .....      | .....      | .....      | .....      |
| PALO ALTO           | .....      | .....      | .....      | .....      | .....      | .....      | .....      | .....      |
| FCR3                | .....      | .....      | .....      | .....      | .....      | .....      | .....      | .....      |
| WELLCOME            | .....      | .....      | .....      | .....      | .....      | .....      | .....      | .....      |
| D6                  | .....      | .....      | .....      | .....      | .....      | .....      | .....      | .....      |
| T996                | .....      | .....      | .....      | .....      | .....      | .....      | .....      | .....      |
| T9102               | .....      | .....      | .....      | .....      | .....      | .....      | .....      | .....      |
| K1                  | .....      | .....      | .....      | .....      | .....      | .....      | .....      | .....      |
| Dd2                 | .....      | .....      | .....      | .....      | .....      | .....      | .....      | .....      |
| D10                 | .....      | .....      | .....      | .....      | .....      | .....      | .....      | .....      |
| FCC2                | .....      | .....      | .....      | .....      | .....      | .....      | .....      | .....      |
| HB3                 | .....      | .....      | .....      | .....      | .....      | .....      | .....      | .....      |
| 7G8                 | .....      | .....      | .....      | .....      | .....      | .....      | .....      | .....      |
| <i>P.reichenowi</i> | .....      | .....      | .....      | .....      | .....      | ---.T      | .A.        | .G.        |

|                     | 330        | 340        | 350        | 360        | 370        | 380       | 390        | 400        |
|---------------------|------------|------------|------------|------------|------------|-----------|------------|------------|
| MAL13P1.174         | AGGTGCTCAA | GTTGATCAAG | CGGTTGAACC | ATTGGAAAAA | TCACCAGAAG | AT-----GA | AAATAAAGAA | ATACCAACTT |
| 3D7                 | .....      | .....      | .....      | .....      | .....      | -----     | .....      | .....      |
| RO33                | .....      | .....      | .....      | .....      | .....      | -----     | .....      | .....      |
| PALO ALTO           | .....      | .....      | .....      | .....      | .....      | -----     | .....      | .....      |
| FCR3                | .....      | .....      | .....      | .....      | .....      | -----     | .....      | .....      |
| WELLCOME            | .....      | .....      | .....      | .....      | .....      | -----     | .....      | .....      |
| D6                  | .....      | .....      | .....      | .....      | .....      | -----     | .....      | .....      |
| T996                | .....      | .....      | .....      | .....      | .....      | -----     | .....      | .....      |
| T9102               | .....      | .....      | .....      | .....      | .....      | -----     | .....      | .....      |
| K1                  | .....      | .....      | .....      | .....      | .....      | -----     | .....      | .....      |
| Dd2                 | .....      | .....      | .....      | .....      | .....      | -----     | .....      | .....      |
| D10                 | .....      | .....      | .....      | .....      | .....      | -----     | .....      | .....      |
| FCC2                | .....      | .....      | .....      | .....      | .....      | -----     | .....      | .....      |
| HB3                 | .....      | .....      | .....      | .....      | .....      | -----     | .....      | .....      |
| 7G8                 | .....      | .....      | .....      | .....      | .....      | -----     | .....      | .....      |
| <i>P.reichenowi</i> | .....      | .....      | .C..T.     | .....      | .....      | .AACATA.  | .G.        | .....      |

|                     | 410        | 420        | 430        | 440        | 450        | 460        | 470        | 480        |
|---------------------|------------|------------|------------|------------|------------|------------|------------|------------|
| MAL13P1.174         | TGGATTCAAC | ACAAAATGGA | AATCCTACTT | CTTATACATC | AAATTTAAGT | ACACCACCTC | TTAAACGCAT | GGATGAAGTT |
| 3D7                 | .....      | .....      | .....      | .....      | .....      | .....      | .....      | .....      |
| RO33                | .....      | .....      | .....      | .....      | .....      | .....      | .....      | .....      |
| PALO ALTO           | .....      | .....      | .....      | .....      | .....      | .....      | .....      | .....      |
| FCR3                | .....      | .....      | .....      | .....      | .....      | .....      | .....      | .....      |
| WELLCOME            | .....      | .....      | .....      | .....      | .....      | .....      | .....      | .....      |
| D6                  | .....      | .....      | .....      | .....      | .....      | .....      | .....      | .....      |
| T996                | .....      | .....      | .....      | .....      | .....      | .....      | .....      | .....      |
| T9102               | .....      | .....      | .....      | .....      | .....      | .....      | .....      | .....      |
| K1                  | .....      | .....      | .....      | .....      | .....      | .....      | .....      | .....      |
| Dd2                 | .....      | .....      | .....      | .....      | .....      | .....      | .....      | .....      |
| D10                 | .....      | .....      | .....      | .....      | .....      | .....      | .....      | .....      |
| FCC2                | .....      | .....      | .....      | .....      | .....      | .....      | .....      | .....      |
| HB3                 | .....      | .....      | .....      | .....      | .....      | .....      | .....      | .....      |
| 7G8                 | .....      | .....      | .....      | .....      | .....      | .....      | .....      | .....      |
| <i>P.reichenowi</i> | .A.C.      | .....A.    | .....A     | .....      | .....      | .....      | .....      | .....      |

|                     | 490         | 500        | 510        | 520        | 530        | 540         | 550        | 560        |
|---------------------|-------------|------------|------------|------------|------------|-------------|------------|------------|
| MAL13P1.174         | TTTGACGATG  | TTCTTAAACA | TTTAAATAAA | GAAGATAAAG | TTGTCACTGA | TGAGAATAAA  | AATAAATATA | ATGAATTTAA |
| 3D7                 | .....       | .....      | .....      | .....      | .....      | .....       | .....      | .....      |
| RO33                | .....       | .....      | .....      | .....      | .....      | .....       | .....      | .....      |
| PALO ALTO           | .....       | .....      | .....      | .....      | .....      | .....       | .....      | .....      |
| FCR3                | .....       | .....      | .....      | .....      | .....      | .....       | .....      | .....      |
| WELLCOME            | .....       | .....      | .....      | .....      | .....      | .....       | .....      | .....      |
| D6                  | .....       | .....      | .....      | .....      | .....      | .....       | .....      | .....      |
| T996                | .....T..... | .....      | .....      | .....      | .....      | .....       | .....      | .....      |
| T9102               | .....       | .....      | .....      | .....      | .....      | .....       | .....      | .....      |
| K1                  | .....       | .....      | .....      | .....      | .....      | .....       | .....      | .....      |
| Dd2                 | .....       | .....      | .....      | .....      | .....      | .....       | .....      | .....      |
| D10                 | .....       | .....      | .....      | .....      | .....      | .....       | .....      | .....      |
| FCC2                | .....       | .....      | .....      | .....      | .....      | .....       | .....      | .....      |
| HB3                 | .....       | .....      | .....      | .....      | .....      | .....       | .....      | .....      |
| 7G8                 | .....       | .....      | .....      | .....      | .....      | .....       | .....      | .....      |
| <i>P.reichenowi</i> | .....T..... | .....      | .....      | .....      | .....      | .....G..... | .....      | .....      |

|                     | 570        | 580        | 590        | 600        | 610        | 620        | 630        | 640        |
|---------------------|------------|------------|------------|------------|------------|------------|------------|------------|
| MAL13P1.174         | AAAAGAGTTT | GATATCTTTA | CTATGAATGT | AAGTGAATAT | GAAATAATGA | AAAACCTTCT | TATTACATTC | TCAAAGAAAA |
| 3D7                 | .....      | .....      | .....      | .....      | .....      | .....      | .....      | .....      |
| RO33                | .....      | .....      | .....      | .....      | .....      | .....      | .....      | .....      |
| PALO ALTO           | .....      | .....      | .....      | .....      | .....      | .....      | .....      | .....      |
| FCR3                | .....      | .....      | .....      | .....      | .....      | .....      | .....      | .....      |
| WELLCOME            | .....      | .....      | .....      | .....      | .....      | .....      | .....      | .....      |
| D6                  | .....      | .....      | .....      | .....      | .....      | .....      | .....      | .....      |
| T996                | .....      | .....      | .....      | .....      | .....      | .....      | .....      | .....      |
| T9102               | .....      | .....      | .....      | .....      | .....      | .....      | .....      | .....      |
| K1                  | .....      | .....      | .....      | .....      | .....      | .....      | .....      | .....      |
| Dd2                 | .....      | .....      | .....      | .....      | .....      | .....      | .....      | .....      |
| D10                 | .....      | .....      | .....      | .....      | .....      | .....      | .....      | .....      |
| FCC2                | .....      | .....      | .....      | .....      | .....      | .....      | .....      | .....      |
| HB3                 | .....      | .....      | .....      | .....      | .....      | .....      | .....      | .....      |
| 7G8                 | .....      | .....      | .....      | .....      | .....      | .....      | .....      | .....      |
| <i>P.reichenowi</i> | .....      | .....      | .....      | .....      | .....      | .....      | .....      | .....      |

|                     | 650        | 660        | 670        | 680         | 690        | 700        | 710        | 720        |
|---------------------|------------|------------|------------|-------------|------------|------------|------------|------------|
| MAL13P1.174         | TTGATGAAAA | TAATCAAATT | CAAACAAAAA | TAGAAAAATAT | ATTTAATAAA | GCTTTAAAGG | ATAATAAATA | TAAAGAACAA |
| 3D7                 | .....      | .....      | .....      | .....       | .....      | .....      | .....      | .....      |
| RO33                | .....      | .....      | .....      | .....       | .....      | .....      | .....      | .....      |
| PALO ALTO           | .....      | .....      | .....      | .....       | .....      | .....      | .....      | .....      |
| FCR3                | .....      | .....      | .....      | .....       | .....      | .T.....    | .....      | .....      |
| WELLCOME            | .....      | .....      | .....      | .....       | .....      | .T.....    | .....      | .....      |
| D6                  | .....      | .....      | .....      | .....       | .....      | .....      | .....      | .....      |
| T996                | .....      | .....      | .....      | .....       | .....      | .....      | .....      | .....      |
| T9102               | .....      | .....      | .....      | .....       | .....      | .....      | .....      | .....      |
| K1                  | .....      | .....      | .....      | .....       | .....      | .....      | .....      | .....      |
| Dd2                 | .....      | .....      | .....      | .....       | .....      | .....      | .....      | .....      |
| D10                 | .....      | .....      | .....      | .....       | .....      | .....      | .....      | .....      |
| FCC2                | .....      | .....      | .....      | .....       | .....      | .....      | .....      | .....      |
| HB3                 | .....      | .....      | .....      | .....       | .....      | .....      | .....      | .....      |
| 7G8                 | .....      | .....      | .....      | .....       | .....      | .....      | .....      | .....      |
| <i>P.reichenowi</i> | .....      | .....      | .....      | .....       | .....      | .....      | .C.....    | .....      |

|                     | 730        | 740        | 750        | 760        | 770        | 780        | 790       | 800        |
|---------------------|------------|------------|------------|------------|------------|------------|-----------|------------|
| MAL13P1.174         | TTTAAAAACT | TTATCTATGG | ATTGTATAGC | TTTGCAAAAA | GACATAATTA | TTTAATAGTT | AATAAACTA | ATGACACAAC |
| 3D7                 | .....      | .....      | .....      | .....      | .....      | .....      | .....     | .....      |
| RO33                | .....      | .....      | .....      | .....      | .....      | .....      | .....     | .....      |
| PALO ALTO           | .....      | .....      | .....      | .....      | .....      | .....      | .....     | .....      |
| FCR3                | .....      | .....      | .....      | .....      | .....      | .....      | .....     | .....      |
| WELLCOME            | .....      | .....      | .....      | .....      | .....      | .....      | .....     | .....      |
| D6                  | .....      | .....      | .....      | .....      | .....      | .....      | .....     | .....      |
| T996                | .....      | .....      | .....      | .....      | .....      | .....      | .....     | .....      |
| T9102               | .....      | .....      | .....      | .....      | .....      | .....      | .....     | .....      |
| K1                  | .....      | .....      | .....      | .....      | .....      | .....      | .....     | .....      |
| Dd2                 | .....      | .....      | .....      | .....      | .....      | .....      | .....     | .....      |
| D10                 | .....      | .....      | .....      | .....      | .....      | .....      | .....     | .....      |
| FCC2                | .....      | .....      | .....      | .....      | .....      | .....      | .....     | .....      |
| HB3                 | .....      | .....      | .....      | .....      | .....      | .....      | .....     | .....      |
| 7G8                 | .....      | .....      | .....      | .....      | .....      | .....      | .....     | .....      |
| <i>P.reichenowi</i> | .....      | .C.....    | .A.....    | .A.....    | .....      | .C...GG..  | .....     | .T.....    |

|                     | 810        | 820        | 830        | 840        | 850           |
|---------------------|------------|------------|------------|------------|---------------|
| MAL13P1.174         | ACTACATAAA | GATTTATTGG | AAAATGCTCT | TAATTTAATA | AATACTATTT AG |
| 3D7                 | .....      | .....      | .....      | .....      | .....         |
| RO33                | .....      | .....      | .....      | .....      | .....         |
| PALO ALTO           | .....      | .....      | .....      | .....      | .....         |
| FCR3                | .....      | .....      | .....      | .....      | .....         |
| WELLCOME            | .....      | .....      | .....      | .....      | .....         |
| D6                  | .....      | .....      | .....      | .....      | .....         |
| T996                | .....      | .....      | .....      | .....      | .....         |
| T9102               | .....      | .....      | .....      | .....      | .....         |
| K1                  | .....      | .....      | .....      | .....      | .....         |
| Dd2                 | .....      | .....      | .....      | .....      | .....         |
| D10                 | .....      | .....      | .....      | .....      | .....         |
| FCC2                | .....      | .....      | .....      | .....      | .....         |
| HB3                 | .....      | .....      | .....      | .....      | .....         |
| 7G8                 | .....      | .....      | .....      | .....      | .....         |
| <i>P.reichenowi</i> | ..T...G..  | .A.....    | .....      | .....      | .....         |

MRSP3

```

          10          20          30          40          50          60          70          80
PF13_0193  ....|....|  ....|....|  ....|....|  ....|....|  ....|....|  ....|....|  ....|....|
3D7        ATGATAAAAG GACTTATTTT TTATTGTGTT ATATGCTTTT TTGTATTTT  CGTACACGCT GTTTCATCAC AGGAACAGCC
RO33
Palo Alto
FCR3
Wellcome
D6
T996
T9102
K1
Dd2
D10
FCC2
HB3
7G8
P.reichenowi  .... .CC. .... .C. .... .A. .C. ....

          90          100          110          120          130          140          150          160
PF13_0193  ....|....|  ....|....|  ....|....|  ....|....|  ....|....|  ....|....|  ....|....|
3D7        AAACCATACA GACATATATA CCAATGAAGA TTATAAACTA TTAGAAGAAC TAGAAAAATA TCTTGATAAT TTAAAAAATA
RO33
Palo Alto
FCR3
Wellcome
D6
T996
T9102
K1
Dd2
D10
FCC2
HB3
7G8
P.reichenowi  .... .T. .... A.T.A. .... .G. .... .G. ....

          170          180          190          200          210          220          230          240
PF13_0193  ....|....|  ....|....|  ....|....|  ....|....|  ....|....|  ....|....|  ....|....|
3D7        CATTACACA CAAGTTTCTT GAGAACTTTA AAGGTGATAT CGAATTATTA AAAAAAACA TTCAAAACCT TGAAAAAATA
RO33
Palo Alto
FCR3
Wellcome
D6
T996
T9102
K1
Dd2
D10
FCC2
HB3
7G8
P.reichenowi  .... .A. .... .A. .... .T. ....

          250          260          270          280          290          300          310          320
PF13_0193  ....|....|  ....|....|  ....|....|  ....|....|  ....|....|  ....|....|  ....|....|
3D7        AATTATAATA ATGTAACAGG TCAAAATGTG GACGATTATG AT----- -----AAAA ATGGTGATAA
RO33
Palo Alto
FCR3
Wellcome
D6
T996
T9102
K1
Dd2
D10
FCC2
HB3
7G8
P.reichenowi  .... .G. .... .A. .... .GATGAACA TCAAACAGT TATGAT .... .C. ....
```

|                     | 330        | 340        | 350         | 360         | 370        | 380        | 390        | 400        |
|---------------------|------------|------------|-------------|-------------|------------|------------|------------|------------|
| PF13_0193           | TAATAATCAT | AATGAT     |             |             |            |            |            |            |
| 3D7                 | .....      | .....      | .....       | .....       | .....      | .....      | .....      | .....      |
| RO33                | .....      | .....      | .....       | .....       | .....      | .....      | .....      | .....      |
| Palo Alto           | .....      | .....      | .....       | .....       | .....      | .....      | .....      | .....      |
| FCR3                | .....      | .....      | .....       | .....       | .....      | .....      | .....      | .....      |
| Wellcome            | .....      | .....      | .....       | .....       | .....      | .....      | .....      | .....      |
| D6                  | .....      | .....      | .....       | .....       | .....      | .....      | .....      | .....      |
| T996                | .....      | .....      | .....       | .....       | .....      | .....      | .....      | .....      |
| T9102               | .....      | .....      | .....       | .....       | .....      | .....      | .....      | .....      |
| K1                  | .....      | .....      | .....       | .....       | .....      | .....      | .....      | .....      |
| Dd2                 | .....      | .....      | .....       | .....       | .....      | .....      | .....      | .....      |
| D10                 | .....      | .....      | .....       | .....       | .....      | .....      | .....      | .....      |
| FCC2                | .....      | .....      | .....       | .....       | .....      | .....      | .....      | .....      |
| HB3                 | .....      | .....      | .....       | .....       | .....      | .....      | .....      | .....      |
| 7G8                 | .....      | .....      | .....       | .....       | .....      | .....      | .....      | .....      |
| <i>P.reichenowi</i> | A...G..G.. | ..AA..GATG | ATAAAAAATGG | TCATAAAAAAT | GATGATAAAA | ATGGTCATAA | AAATGATGAT | AAAAATGATG |

|                     | 410         | 420         | 430        | 440        | 450        | 460        | 470         | 480         |
|---------------------|-------------|-------------|------------|------------|------------|------------|-------------|-------------|
| PF13_0193           | .....       | .....       | .....      | .....      | .....      | .....      | .....       | .....       |
| 3D7                 | .....       | .....       | .....      | .....      | .....      | .....      | .....       | .....       |
| RO33                | .....       | .....       | .....      | .....      | .....      | .....      | .....       | .....       |
| Palo Alto           | .....       | .....       | .....      | .....      | .....      | .....      | .....       | .....       |
| FCR3                | .....       | .....       | .....      | .....      | .....      | .....      | .....       | .....       |
| Wellcome            | .....       | .....       | .....      | .....      | .....      | .....      | .....       | .....       |
| D6                  | .....       | .....       | .....      | .....      | .....      | .....      | .....       | .....       |
| T996                | .....       | .....       | .....      | .....      | .....      | .....      | .....       | .....       |
| T9102               | .....       | .....       | .....      | .....      | .....      | .....      | .....       | .....       |
| K1                  | .....       | .....       | .....      | .....      | .....      | .....      | .....       | .....       |
| Dd2                 | .....       | .....       | .....      | .....      | .....      | .....      | .....       | .....       |
| D10                 | .....       | .....       | .....      | .....      | .....      | .....      | .....       | .....       |
| FCC2                | .....       | .....       | .....      | .....      | .....      | .....      | .....       | .....       |
| HB3                 | .....       | .....       | .....      | .....      | .....      | .....      | .....       | .....       |
| 7G8                 | .....       | .....       | .....      | .....      | .....      | .....      | .....       | .....       |
| <i>P.reichenowi</i> | ATAAAAAATGA | TGATAAAAAAT | GGTGATAAAA | ATGATGATAA | AAATGATGAT | AAAAATGGTG | ATAAAAAATGA | TGATAAAAAAT |

|                     | 490        | 500     | 510   | 520   | 530   | 540   | 550   | 560   |
|---------------------|------------|---------|-------|-------|-------|-------|-------|-------|
| PF13_0193           | .....      | .....   | ..... | ..... | ..... | ..... | ..... | ..... |
| 3D7                 | .....      | .....   | ..... | ..... | ..... | ..... | ..... | ..... |
| RO33                | .....      | .....   | ..... | ..... | ..... | ..... | ..... | ..... |
| Palo Alto           | .....      | .....   | ..... | ..... | ..... | ..... | ..... | ..... |
| FCR3                | .....      | .....   | ..... | ..... | ..... | ..... | ..... | ..... |
| Wellcome            | .....      | .....   | ..... | ..... | ..... | ..... | ..... | ..... |
| D6                  | .....      | .....   | ..... | ..... | ..... | ..... | ..... | ..... |
| T996                | .....      | .....   | ..... | ..... | ..... | ..... | ..... | ..... |
| T9102               | .....      | .....   | ..... | ..... | ..... | ..... | ..... | ..... |
| K1                  | .....      | .....   | ..... | ..... | ..... | ..... | ..... | ..... |
| Dd2                 | .....      | .....   | ..... | ..... | ..... | ..... | ..... | ..... |
| D10                 | .....      | .....   | ..... | ..... | ..... | ..... | ..... | ..... |
| FCC2                | .....      | .....   | ..... | ..... | ..... | ..... | ..... | ..... |
| HB3                 | .....      | .....   | ..... | ..... | ..... | ..... | ..... | ..... |
| 7G8                 | .....      | .....   | ..... | ..... | ..... | ..... | ..... | ..... |
| <i>P.reichenowi</i> | GATGATAAAA | AT----- | ----- | ----- | ----- | ----- | ----- | ----- |

|                     | 570        | 580        | 590        | 600        | 610        | 620        | 630        | 640        |
|---------------------|------------|------------|------------|------------|------------|------------|------------|------------|
| PF13_0193           | AGTTGATGTT | TCAGCAAGTA | AAGTTACTCA | AAAAAGTGAT | GAAACCAAAG | CTGATGAAAA | AGCTGAACAG | AATGCTGAAG |
| 3D7                 | .....      | .....      | .....      | .....      | .....      | .....      | .....      | .....      |
| RO33                | .....      | .....      | .....      | .....      | .....      | .....      | .....      | .....      |
| Palo Alto           | .....      | .....      | .....      | .....      | .....      | .....      | .....      | .....      |
| FCR3                | .....      | .....      | .....      | .....      | .....      | .....      | .....      | .....      |
| Wellcome            | .....      | .....      | .....      | .....      | .....      | .....      | .....      | .....      |
| D6                  | .....      | .....      | .....      | .....      | .....      | .....      | .....      | .....      |
| T996                | .....      | .....      | .....      | .....      | .....      | .....      | .....      | .....      |
| T9102               | .....      | .....      | .....      | .....      | .....      | .....      | .....      | .....      |
| K1                  | .....      | .....      | .....      | .....      | .....      | .....      | .....      | .....      |
| Dd2                 | .....      | .....      | .....      | .....      | .....      | .....      | .....      | .....      |
| D10                 | .....      | .....      | .....      | .....      | .....      | .....      | .....      | .....      |
| FCC2                | .....      | .....      | .....      | .....      | .....      | .....      | .....      | .....      |
| HB3                 | .....      | .....      | .....      | .....      | .....      | .....      | .....      | .....      |
| 7G8                 | .....      | .....      | .....      | .....      | .....      | .....      | .....      | .....      |
| <i>P.reichenowi</i> | -----      | -----      | -----      | -----      | -----      | -----      | A..C..A    | .....C     |

|                     | 650        | 660        | 670        | 680        | 690        | 700        | 710        | 720        |
|---------------------|------------|------------|------------|------------|------------|------------|------------|------------|
| PF13_0193           | CTAACGCATC | TTCATCCGCT | TCATCAGAAG | AACAAAGTTC | ATCATTACAA | AATACAAATG | ACCAATCATT | TGGTAACACA |
| 3D7                 | .....      | .....      | .....      | .....      | .....      | .....      | .....      | .....      |
| RO33                | .....      | .....      | .....      | .....      | .....      | .....      | .....      | .....      |
| Palo Alto           | .....      | .....      | .....      | .....      | .....      | .....      | .....      | .....      |
| FCR3                | .....      | .....      | .....      | .....      | .....      | .....      | .....      | .....      |
| Wellcome            | .....      | .....      | .....      | .....      | .....      | .....      | .....      | .....      |
| D6                  | .....      | .....      | .....      | .....      | .....      | .....      | .....      | .....      |
| T996                | .....      | .....      | .....      | .....      | .....      | .....      | .....      | .....      |
| T9102               | .....      | .....      | .....      | .....      | .....      | .....      | .....      | .....      |
| K1                  | .....      | .....      | .....      | .....      | .....      | .....      | .....      | .....      |
| Dd2                 | .....      | .....      | .....      | .....      | .....      | .....      | .....      | .....      |
| D10                 | .....      | .....      | .....      | .....      | .....      | .....      | .....      | .....      |
| FCC2                | .....      | .....      | .....      | .....      | .....      | .....      | .....      | .....      |
| HB3                 | .....      | .....      | .....      | .....      | .....      | .....      | .....      | .....      |
| 7G8                 | .....      | .....      | .....      | .....      | .....      | .....      | .....      | .....      |
| <i>P.reichenowi</i> | .....      | ..TC..     | ..A..C.    | .....      | ..G.G.     | .....      | ..G..T.    | .....      |

|                     | 730        | 740        | 750        | 760        | 770        | 780        | 790        | 800        |
|---------------------|------------|------------|------------|------------|------------|------------|------------|------------|
| PF13_0193           | AATAATCCAA | AAATGGATAG | AAAAAATGCC | GATGAACAAA | AAAGAGATGC | AGGTTTATCT | AATTTAAAAA | ATATAGATAA |
| 3D7                 | .....      | .....      | .....      | .....      | .....      | .....      | .....      | .....      |
| RO33                | .....      | .....      | .....      | .....      | .....      | .....      | .....      | .....      |
| Palo Alto           | .....      | .....      | .....      | .....      | .....      | .....      | .....      | .....      |
| FCR3                | .....      | .....      | .....      | .....      | .....      | .....      | .....      | .....      |
| Wellcome            | .....      | .....      | .....      | .....      | .....      | .....      | .....      | .....      |
| D6                  | .....      | .....      | .....      | .....      | .....      | .....      | .....      | .....      |
| T996                | .....      | .....      | .....      | .....      | .....      | .....      | .....      | .....      |
| T9102               | .....      | .....      | .....      | .....      | .....      | .....      | .....      | .....      |
| K1                  | .....      | .....      | .....      | .....      | .....      | .....      | .....      | .....      |
| Dd2                 | .....      | .....      | .....      | .....      | .....      | .....      | .....      | .....      |
| D10                 | .....      | .....      | .....      | .....      | .....      | .....      | .....      | .....      |
| FCC2                | .....      | .....      | .....      | .....      | .....      | .....      | .....      | .....      |
| HB3                 | .....      | .....      | .....      | .....      | .....      | .....      | .....      | .....      |
| 7G8                 | .....      | .....      | .....      | .....      | .....      | .....      | .....      | .....      |
| <i>P.reichenowi</i> | .....      | ..A..C.    | ..T..TAA.  | .....      | .....      | ..TA..T.A. | CTAA.TT.   | ..A..T.G.T |

|                     | 810         | 820        | 830       | 840      | 850          | 860        | 870        | 880        |
|---------------------|-------------|------------|-----------|----------|--------------|------------|------------|------------|
| PF13_0193           | ACTTTGCGAT  | GAACTCCTAA | TCTATTATA | TAAAAAAT | GAAGTAAATA   | CCAATAATTA | TCTTAGAAAA | TATGATGAAT |
| 3D7                 | .....       | .....      | .....     | .....    | .....        | .....      | .....      | .....      |
| RO33                | .....       | .....      | .....     | .....    | .....        | .....      | .....      | .....      |
| Palo Alto           | .....       | .....      | .....     | .....    | .....        | .....      | .....      | .....      |
| FCR3                | .....       | .....      | .....     | .....    | .....        | .....      | .....      | .....      |
| Wellcome            | .....       | .....      | .....     | .....    | .....        | .....      | .....      | .....      |
| D6                  | .....       | .....      | .....     | .....    | .....        | .....      | .....      | .....      |
| T996                | .....       | .....      | .....     | .....    | .....        | .....      | .....      | .....      |
| T9102               | .....       | .....      | .....     | .....    | .....        | .....      | .....      | .....      |
| K1                  | .....       | .....      | .....     | .....    | .....        | .....      | .....      | .....      |
| Dd2                 | .....       | .....      | .....     | .....    | .....        | .....      | .....      | .....      |
| D10                 | .....       | .....      | .....     | .....    | .....        | .....      | .....      | .....      |
| FCC2                | .....       | .....      | .....     | .....    | .....        | .....      | .....      | .....      |
| HB3                 | .....       | .....      | .....     | .....    | .....        | .....      | .....      | .....      |
| 7G8                 | .....       | .....      | .....     | .....    | .....        | .....      | .....      | .....      |
| <i>P.reichenowi</i> | ..AAC.TT.CG | ATGAA.TCCT | AA.C.A.T. | ..T..... | A.A.T.A.GTA. | AT.CC...A. | TA.CTT.G.  | A.AT...TG  |

|                     | 890        | 900        | 910        | 920        | 930        | 940        | 950        | 960        |
|---------------------|------------|------------|------------|------------|------------|------------|------------|------------|
| PF13_0193           | TTAAAAATAA | ATTGATCAA  | TTTTATTGA  | ATGTTAATAA | ATATGAATTA | CTTAAGAAAC | TCATTCTTAA | TTTTTTTAAA |
| 3D7                 | .....      | .....      | .....      | .....      | .....      | .....      | .....      | .....      |
| RO33                | .....      | .....      | .....      | .....      | .....      | .....      | .....      | .....      |
| Palo Alto           | .....      | .....      | .....      | .....      | .....      | .....      | .....      | .....      |
| FCR3                | .....      | .....      | .....      | .....      | .....      | .....      | .....      | .....      |
| Wellcome            | .....      | .....      | .....      | .....      | .....      | .....      | .....      | .....      |
| D6                  | .....      | .....      | .....      | .....      | .....      | .....      | .....      | .....      |
| T996                | .....      | .....      | .....      | .....      | .....      | .....      | .....      | .....      |
| T9102               | .....      | .....      | .....      | .....      | .....      | .....      | .....      | .....      |
| K1                  | .....      | .....      | .....      | .....      | .....      | .....      | .....      | .....      |
| Dd2                 | .....      | .....      | .....      | .....      | .....      | .....      | .....      | .....      |
| D10                 | .....      | .....      | .....      | .....      | .....      | .....      | .....      | .....      |
| FCC2                | .....      | .....      | .....      | .....      | .....      | .....      | .....      | .....      |
| HB3                 | .....      | .....      | .....      | .....      | .....      | .....      | .....      | .....      |
| 7G8                 | .....      | .....      | .....      | .....      | .....      | .....      | .....      | .....      |
| <i>P.reichenowi</i> | AATTT..A.. | TAAATT.G.T | CAA..T..AT | TGAA.GT... | TA.AT.TGA. | T.ACTT..GA | AAC.CA..CT | AA.G..TTT  |





```

          1290      1300      1310
    ....|....| ....|....| ....|....| .
PF13_0193 ACCAGCCACA GCGACACAAC AAAAAAATA A
3D7
RO33
Palo Alto
FCR3
Wellcome
D6
T996
T9102
K1
Dd2
D10
FCC2
HB3
7G8
P.reichenowi

```

**MRSP4**

```

          10      20      30      40      50      60      70      80
    ....|....| ....|....| ....|....| ....|....| ....|....| ....|....|
MAL13_P1.173 ATGAAAGGTA GAATTATATC TTTTTCATTT TTCCTTTTCT GTATGGTTCA TTTTGTATTT TGTGATAAAA ATACATTCCC
3D7
RO33
Palo Alto
FCR3
Wellcome
D6
T996
T9102
K1
Dd2
FCC2
D10
HB3
7G8
P.reichenowi
          .C.          .G.

```

```

          90      100      110      120      130      140      150      160
    ....|....| ....|....| ....|....| ....|....| ....|....| ....|....|
MAL13_P1.173 TAAAGAAATA ATTGAATATG AAAAAGACTT GGAATTAGCA AAAATAAAG AAAAATTACA AAACCTAAAT GACATAATAG
3D7
RO33
Palo Alto
FCR3
Wellcome
D6
T996
T9102
K1
Dd2
FCC2
D10
HB3
7G8
P.reichenowi
          .A.

```

```

          170      180      190      200      210      220      230      240
    ....|....| ....|....| ....|....| ....|....| ....|....| ....|....|
MAL13_P1.173 TAGACAAATT GATAGAATCC TTAAAGATA ATGTTGATGT ATTAAAGTA ATAATCAAG AATTAGAAAA AGAAAAAGAA
3D7
RO33
Palo Alto
FCR3
Wellcome
D6
T996
T9102
K1
Dd2
FCC2
D10
HB3
7G8
P.reichenowi
          .G          .T

```

|                     | 250       | 260       | 270         | 280        | 290       | 300        | 310           | 320           |
|---------------------|-----------|-----------|-------------|------------|-----------|------------|---------------|---------------|
| MAL13_P1.173        | .... .... | .... .... | .... ....   | .... ....  | .... .... | .... ....  | .... ....     | .... ....     |
| 3D7                 | AGGAAAATA | AATTGGCAA | GAAAAAAGG   | GAAATAAGCA | ATAATGATT | TTTAAACAAT | AAGAATAGTA    | ATAAAATTAA    |
| RO33                | .....     | .....     | .....       | .....      | .....     | .....      | .....         | .....T.G..    |
| Palo Alto           | .....     | .....     | .....       | .....      | .....     | .....      | .....         | .....T...T... |
| FCR3                | .....     | .....     | .....       | .....      | .....     | .....      | .....         | .....T...T... |
| Wellcome            | .....     | .....     | .....       | .....      | .....     | .....      | .....         | .....T...T... |
| D6                  | .....     | .....     | .....       | .....      | .....     | .....      | .....         | .....T...T... |
| T996                | .....     | .....     | .....       | .....      | .....     | .....      | .....         | .....T...T... |
| T9102               | .....     | .....     | .....       | .....      | .....     | .....      | .....         | .....T...T... |
| K1                  | .....     | .....     | .....       | .....      | .....     | .....      | .....         | .....T...T... |
| Dd2                 | .....     | .....     | .....       | .....      | .....     | .....      | .....         | .....T...T... |
| FCC2                | .....     | .....     | .....       | .....      | .....     | .....      | .....         | .....T...T... |
| D10                 | .....     | .....     | .....       | .....      | .....     | .....      | .....         | .....T...T... |
| HB3                 | .....     | .....     | .....       | .....      | .....     | .....      | .....         | .....T...T... |
| 7G8                 | .....     | .....     | .....       | .....      | .....     | .....      | .....         | .....T...T... |
| <i>P.reichenowi</i> | -----     | .....     | .....G..... | .....      | .....     | .....      | .....A...T... | .....T...     |

|                     | 330        | 340       | 350        | 360         | 370       | 380         | 390        | 400        |
|---------------------|------------|-----------|------------|-------------|-----------|-------------|------------|------------|
| MAL13_P1.173        | .... ....  | .... .... | .... ....  | .... ....   | .... .... | .... ....   | .... ....  | .... ....  |
| 3D7                 | AGGACAAGGA | TTTTTACTT | CTACATGGAA | ACAAATAAAA  | GGAAATCTG | AAGAAAATTC  | GGAGAATCAA | CAAAAATCAT |
| RO33                | .....      | .....     | .....      | .....       | .....     | .....       | .....      | .....      |
| Palo Alto           | .....      | .....     | .....      | .....       | .....     | .....       | .....      | .....      |
| FCR3                | .....      | .....     | .....      | .....       | .....     | .....       | .....      | .....      |
| Wellcome            | .....      | .....     | .....      | .....       | .....     | .....       | .....      | .....      |
| D6                  | .....      | .....     | .....      | .....       | .....     | .....       | .....      | .....      |
| T996                | .....      | .....     | .....      | .....       | .....     | .....       | .....      | .....      |
| T9102               | .....      | .....     | .....      | .....       | .....     | .....       | .....      | .....      |
| K1                  | .....      | .....     | .....      | .....       | .....     | .....       | .....      | .....      |
| Dd2                 | .....      | .....     | .....      | .....       | .....     | .....       | .....      | .....      |
| FCC2                | .....      | .....     | .....      | .....       | .....     | .....       | .....      | .....      |
| D10                 | .....      | .....     | .....      | .....       | .....     | .....       | .....      | .....      |
| HB3                 | .....      | .....     | .....      | .....       | .....     | .....       | .....      | .....      |
| 7G8                 | .....      | .....     | .....      | .....       | .....     | .....       | .....      | .....      |
| <i>P.reichenowi</i> | .....T     | .....     | .....      | .....T..... | .....     | .....G..... | .....      | .....      |

|                     | 410        | 420        | 430        | 440        | 450        | 460        | 470        | 480        |
|---------------------|------------|------------|------------|------------|------------|------------|------------|------------|
| MAL13_P1.173        | .... ....  | .... ....  | .... ....  | .... ....  | .... ....  | .... ....  | .... ....  | .... ....  |
| 3D7                 | CAAAAAGCCA | ATCGTTACAA | TCAAATGAAC | CAAATAAATT | AAATCAAGAA | AATATATCCC | CAGTACAAAC | CACCATAACA |
| RO33                | .....      | .....      | .....      | .....      | .....      | .....      | .....      | .....      |
| Palo Alto           | .....      | .....      | .....      | .....      | .....      | .....      | .....      | .....      |
| FCR3                | .....      | .....      | .....      | .....      | .....      | .....      | .....      | .....      |
| Wellcome            | .....      | .....      | .....      | .....      | .....      | .....      | .....      | .....      |
| D6                  | .....      | .....      | .....      | .....      | .....      | .....      | .....      | .....      |
| T996                | .....      | .....      | .....      | .....      | .....      | .....      | .....      | .....      |
| T9102               | .....      | .....      | .....      | .....      | .....      | .....      | .....      | .....      |
| K1                  | .....      | .....      | .....      | .....      | .....      | .....      | .....      | .....      |
| Dd2                 | .....      | .....      | .....      | .....      | .....      | .....      | .....      | .....      |
| FCC2                | .....      | .....      | .....      | .....      | .....      | .....      | .....      | .....      |
| D10                 | .....      | .....      | .....      | .....      | .....      | .....      | .....      | .....      |
| HB3                 | .....      | .....      | .....      | .....      | .....      | .....      | .....      | .....      |
| 7G8                 | .....      | .....      | .....      | .....      | .....      | .....      | .....      | .....      |
| <i>P.reichenowi</i> | .....T     | .....      | .....      | .....      | .....      | .....      | .....      | .....      |

|                     | 490        | 500        | 510        | 520        | 530        | 540        | 550         | 560        |
|---------------------|------------|------------|------------|------------|------------|------------|-------------|------------|
| MAL13_P1.173        | .... ....  | .... ....  | .... ....  | .... ....  | .... ....  | .... ....  | .... ....   | .... ....  |
| 3D7                 | AATACAAATG | TTGATAATAC | AATATCTGTA | ATTAAATATT | TAGATAATGC | TTATGATGAA | GTTCTTAAGG  | AAATGAATTT |
| RO33                | .....      | .....      | .....      | .....      | .....      | .....      | .....       | .....      |
| Palo Alto           | .....      | .....      | .....      | .....      | .....      | .....      | .....       | .....      |
| FCR3                | .....      | .....      | .....      | .....      | .....      | .....      | .....       | .....      |
| Wellcome            | .....      | .....      | .....      | .....      | .....      | .....      | .....       | .....      |
| D6                  | .....      | .....      | .....      | .....      | .....      | .....      | .....       | .....      |
| T996                | .....      | .....      | .....      | .....      | .....      | .....      | .....       | .....      |
| T9102               | .....      | .....      | .....      | .....      | .....      | .....      | .....       | .....      |
| K1                  | .....      | .....      | .....      | .....      | .....      | .....      | .....       | .....      |
| Dd2                 | .....      | .....      | .....      | .....      | .....      | .....      | .....       | .....      |
| FCC2                | .....      | .....      | .....      | .....      | .....      | .....      | .....       | .....      |
| D10                 | .....      | .....      | .....      | .....      | .....      | .....      | .....       | .....      |
| HB3                 | .....      | .....      | .....      | .....      | .....      | .....      | .....       | .....      |
| 7G8                 | .....      | .....      | .....      | .....      | .....      | .....      | .....       | .....      |
| <i>P.reichenowi</i> | .....      | .....      | .....      | .....      | .....      | .....      | .....A..... | .....      |

|                     | 570        | 580        | 590        | 600        | 610        | 620        | 630        | 640        |
|---------------------|------------|------------|------------|------------|------------|------------|------------|------------|
| MAL13_P1.173        | ATCCAAAAAT | TCAGATAATG | AAAAATATCG | TAGCAGGTTT | GACAATTCA  | AACAAGGATT | TGAAAATTTA | ATCCTTAATC |
| 3D7                 | .....      | .....      | .....      | .....      | .....      | .....      | .....      | .....      |
| RO33                | .....      | .....      | .....G.    | .....      | .....      | .....      | .....      | .....      |
| Palo Alto           | .....      | .....      | .....      | .....      | .....      | .....      | .....      | .....      |
| FCR3                | .....      | .....      | .....      | .....      | .....      | .....      | .....      | .....      |
| Wellcome            | .....      | .....      | .....      | .....      | .....      | .....      | .....      | .....      |
| D6                  | .....      | .....      | .....      | .....      | .....      | .....      | .....      | .....      |
| T996                | .....      | .....      | .....      | .....      | .....      | .....      | .....      | .....      |
| T9102               | .....      | .....      | .....      | .....      | .....      | .....      | .....      | .....      |
| K1                  | .....      | .....      | .....      | .....      | .....      | .....      | .....      | .....      |
| Dd2                 | .....      | .....      | .....      | .....      | .....      | .....      | .....      | .....      |
| FCC2                | .....      | .....      | .....      | .....      | .....      | .....      | .....      | .....      |
| D10                 | .....      | .....      | .....      | .....      | .....      | .....      | .....      | .....      |
| HB3                 | .....      | .....      | .....      | .....      | .....      | .....      | .....      | .....      |
| 7G8                 | .....      | .....      | .....G.    | .....      | .....      | .....      | .....      | .....      |
| <i>P.reichenowi</i> | ...G.....  | .....      | .....      | .....      | ...GC..... | .....      | .....      | .....      |

|                     | 650        | 660         | 670        | 680        | 690        | 700        | 710         | 720        |
|---------------------|------------|-------------|------------|------------|------------|------------|-------------|------------|
| MAL13_P1.173        | AAAATGAATA | TGAACCTTATT | AAGAGACTTA | TTCCTGCTTT | TTCTAATCAA | GAAGAATCAG | GTACTAATAA  | AAAAAATCAT |
| 3D7                 | .....      | .....       | .....      | .....      | .....      | .....      | .....       | .....      |
| RO33                | .....      | .....       | .....      | .....      | .....      | .....      | .....       | .....      |
| Palo Alto           | .....      | .....       | .....      | .....      | .....      | .....      | .....       | .....      |
| FCR3                | .....      | .....       | .....      | .....      | .....      | .....      | .....       | .....      |
| Wellcome            | .....      | .....       | .....      | .....      | .....      | .....      | .....       | .....      |
| D6                  | .....      | .....       | .....      | .....      | .....      | .....      | .....       | .....      |
| T996                | .....      | .....       | .....      | .....      | .....      | .....      | .....       | .....      |
| T9102               | .....      | .....       | .....      | .....      | .....      | .....      | .....       | .....      |
| K1                  | .....      | .....       | .....      | .....      | .....      | .....      | .....       | .....      |
| Dd2                 | .....      | .....       | .....      | .....      | .....      | .....      | .....       | .....      |
| FCC2                | .....      | .....       | .....      | .....      | .....      | .....      | .....       | .....      |
| D10                 | .....      | .....       | .....      | .....      | .....      | .....      | .....       | .....      |
| HB3                 | .....      | .....       | .....      | .....      | .....      | .....      | .....       | .....      |
| 7G8                 | .....      | .....       | .....      | .....      | .....      | .....      | .....       | .....      |
| <i>P.reichenowi</i> | .....      | .....       | .....      | .....      | .....      | .....A     | .....G..... | .....      |

|                     | 730        | 740        | 750        | 760        | 770        | 780        | 790        | 800        |
|---------------------|------------|------------|------------|------------|------------|------------|------------|------------|
| MAL13_P1.173        | ATAGTAAATA | TGCTCAAAAA | AGCTTTAGAA | GAAGAGAAAT | TTAGTGATGA | ATTTAAAAAT | TTTATTTATG | GTATTTATGC |
| 3D7                 | .....      | .....      | .....      | .....      | .....      | .....      | .....      | .....      |
| RO33                | .....      | .....      | .....      | .....      | .....      | .....      | .....      | .....      |
| Palo Alto           | .....      | .....      | .....      | .....      | .....      | .....      | .....      | .....      |
| FCR3                | .....      | .....      | .....      | .....      | .....      | .....      | .....      | .....      |
| Wellcome            | .....      | .....      | .....      | .....      | .....      | .....      | .....      | .....      |
| D6                  | .....      | .....      | .....      | .....      | .....      | .....      | .....      | .....      |
| T996                | .....      | .....      | .....      | .....      | .....      | .....      | .....      | .....      |
| T9102               | .....      | .....      | .....      | .....      | .....      | .....      | .....      | .....      |
| K1                  | .....      | .....      | .....      | .....      | .....      | .....      | .....      | .....      |
| Dd2                 | .....      | .....      | .....      | .....      | .....      | .....      | .....      | .....      |
| FCC2                | .....      | .....      | .....      | .....      | .....      | .....      | .....      | .....      |
| D10                 | .....      | .....      | .....      | .....      | .....      | .....      | .....      | .....      |
| HB3                 | .....      | .....      | .....      | .....      | .....      | .....      | .....      | .....      |
| 7G8                 | .....      | .....      | .....      | .....      | .....      | .....      | .....      | .....      |
| <i>P.reichenowi</i> | .....      | .....      | .....      | .....      | .....      | .....      | .....      | .....      |

|                     | 810        | 820        | 830         | 840        | 850         | 860         | 870        | 880        |
|---------------------|------------|------------|-------------|------------|-------------|-------------|------------|------------|
| MAL13_P1.173        | ATATGCCAAG | AAACATAAAT | ATTTAAGACT  | TATAGATTCT | AATAGGGACA  | TATATAAAAA  | CGTTTTTGAA | AATGCAACCA |
| 3D7                 | .....      | .....      | .....       | .....      | .....       | .....       | .....      | .....      |
| RO33                | .....      | .....      | .....       | .....      | .....       | .....       | .....      | .....      |
| Palo Alto           | .....      | .....      | .....       | .....      | .....       | .....       | .....      | .....      |
| FCR3                | .....      | .....      | .....       | .....      | .....       | .....       | .....      | .....      |
| Wellcome            | .....      | .....      | .....       | .....      | .....       | .....       | .....      | .....      |
| D6                  | .....      | .....      | .....       | .....      | .....       | .....       | .....      | .....      |
| T996                | .....      | .....      | .....       | .....      | .....       | .....       | .....      | .....      |
| T9102               | .....      | .....      | .....       | .....      | .....       | .....       | .....      | .....      |
| K1                  | .....      | .....      | .....       | .....      | .....       | .....       | .....      | .....      |
| Dd2                 | .....      | .....      | .....       | .....      | .....       | .....       | .....      | .....      |
| FCC2                | .....      | .....      | .....       | .....      | .....       | .....       | .....      | .....      |
| D10                 | .....      | .....      | .....       | .....      | .....       | .....       | .....      | .....      |
| HB3                 | .....      | .....      | .....       | .....      | .....       | .....       | .....      | .....      |
| 7G8                 | .....      | .....      | .....       | .....      | .....       | .....       | .....      | .....      |
| <i>P.reichenowi</i> | .....      | .....      | .....C..... | .....      | .....C..... | .....G..... | .....      | .....      |











|                     | 1210       | 1220            | 1230       | 1240       | 1250       | 1260       | 1270       | 1280        |
|---------------------|------------|-----------------|------------|------------|------------|------------|------------|-------------|
| PF13_0191           | .... ....  | .... ....       | .... ....  | .... ....  | .... ....  | .... ....  | .... ....  | .... ....   |
| 3D7                 | AATCAAAATG | AATGTGATTT      | AATAAAAAAG | TTGATTATTA | CCTTTTCTCA | AGAAAATGTA | GAAATGAAAA | GAGATTCCAT  |
| RO33                | .....      | .....           | .....      | .....      | .....      | .....      | .....      | .....       |
| Palo Alto           | .....      | .....           | .....      | .....      | .....      | .....      | .....      | .....       |
| FCR3                | .....      | .....           | .....      | .....      | .....      | .....      | .....      | .....       |
| Wellcome            | .....      | .....           | .....      | .....      | .....      | .....      | .....      | .....G..... |
| D6                  | .....      | .....           | .....      | .....      | .....      | .....      | .....      | .....G..... |
| T996                | .....      | .....           | .....      | .....      | .....      | .....      | .....      | .....       |
| T9102               | .....      | .....           | .....      | .....      | .....      | .....      | .....      | .....       |
| K1                  | .....      | .....           | .....      | .....      | .....      | .....      | .....      | .....       |
| Dd2                 | .....      | .....           | .....      | .....      | .....      | .....      | .....      | .....       |
| D10                 | .....      | .....           | .....      | .....      | .....      | .....      | .....      | .....       |
| FCC2                | .....      | .....           | .....      | .....      | .....      | .....      | .....      | .....       |
| HB3                 | .....      | .....           | .....      | .....      | .....      | .....      | .....      | .....       |
| 7G8                 | .....      | .....           | .....      | .....      | .....      | .....      | .....      | .....       |
| <i>P.reichenowi</i> | .....      | .....A...C..... | .....      | .....      | .....      | .....      | .....      | .....       |

|                     | 1290       | 1300        | 1310       | 1320          | 1330       | 1340        | 1350       | 1360       |
|---------------------|------------|-------------|------------|---------------|------------|-------------|------------|------------|
| PF13_0191           | .... ....  | .... ....   | .... ....  | .... ....     | .... ....  | .... ....   | .... ....  | .... ....  |
| 3D7                 | AAAAGAAATT | TTTTTAAAAG  | CTTTGGATGA | TAAAAAATAC    | CGTGAAGTAT | TTAAAAACTT  | CATGTATGGT | GTATATAGTT |
| RO33                | .....      | .....       | .....      | .....         | .....      | .....       | .....      | .....      |
| Palo Alto           | .....      | .....       | .....      | .....         | .....      | .....       | .....      | .....      |
| FCR3                | .....      | .....       | .....      | .....         | .....      | .....       | .....      | .....      |
| Wellcome            | .....      | .....       | .....      | .....         | .....      | .....       | .....      | .....      |
| D6                  | .....      | .....       | .....      | .....         | .....      | .....       | .....      | .....      |
| T996                | .....      | .....       | .....      | .....         | .....      | .....       | .....      | .....      |
| T9102               | .....      | .....       | .....      | .....         | .....      | .....       | .....      | .....      |
| K1                  | .....      | .....       | .....      | .....         | .....      | .....       | .....      | .....      |
| Dd2                 | .....      | .....       | .....      | .....         | .....      | .....       | .....      | .....      |
| D10                 | .....      | .....       | .....      | .....         | .....      | .....       | .....      | .....      |
| FCC2                | .....      | .....       | .....      | .....         | .....      | .....       | .....      | .....      |
| HB3                 | .....      | .....       | .....      | .....         | .....      | .....       | .....      | .....      |
| 7G8                 | .....      | .....       | .....      | .....         | .....      | .....       | .....      | .....      |
| <i>P.reichenowi</i> | .....      | .....G..... | .....      | .....T A..... | .....      | .....T..... | .....      | .....      |

|                     | 1370       | 1380       | 1390       | 1400       | 1410       | 1420       | 1430       | 1440       |
|---------------------|------------|------------|------------|------------|------------|------------|------------|------------|
| PF13_0191           | .... ....  | .... ....  | .... ....  | .... ....  | .... ....  | .... ....  | .... ....  | .... ....  |
| 3D7                 | ATGCAAAACG | TCATAATTAT | TTGGATATTG | AAAAAATGGA | AAAAAATGAA | AGGGCCTATA | AAAAATTATT | CGAAAACACA |
| RO33                | .....      | .....      | .....      | .....      | .....      | .....      | .....      | .....      |
| Palo Alto           | .....      | .....      | .....      | .....      | .....      | .....      | .....      | .....      |
| FCR3                | .....      | .....      | .....      | .....      | .....      | .....      | .....      | .....      |
| Wellcome            | .....      | .....      | .....      | .....      | .....      | .....      | .....      | .....      |
| D6                  | .....      | .....      | .....      | .....      | .....      | .....      | .....      | .....      |
| T996                | .....      | .....      | .....      | .....      | .....      | .....      | .....      | .....      |
| T9102               | .....      | .....      | .....      | .....      | .....      | .....      | .....      | .....      |
| K1                  | .....      | .....      | .....      | .....      | .....      | .....      | .....      | .....      |
| Dd2                 | .....      | .....      | .....      | .....      | .....      | .....      | .....      | .....      |
| D10                 | .....      | .....      | .....      | .....      | .....      | .....      | .....      | .....      |
| FCC2                | .....      | .....      | .....      | .....      | .....      | .....      | .....      | .....      |
| HB3                 | .....      | .....      | .....      | .....      | .....      | .....      | .....      | .....      |
| 7G8                 | .....      | .....      | .....      | .....      | .....      | .....      | .....      | .....      |
| <i>P.reichenowi</i> | .....      | .....      | .....      | .....      | .....      | .....      | .....      | .....      |

|                     | 1450       | 1460            |
|---------------------|------------|-----------------|
| PF13_0191           | .... ....  | .... ....       |
| 3D7                 | CTTAACTTAT | TAGATACCAT ATGA |
| RO33                | .....      | .....           |
| Palo Alto           | .....      | .....           |
| FCR3                | .....      | .....           |
| Wellcome            | .....      | .....           |
| D6                  | .....      | .....           |
| T996                | .....      | .....           |
| T9102               | .....      | .....           |
| K1                  | .....      | .....           |
| Dd2                 | .....      | .....           |
| D10                 | .....      | .....           |
| FCC2                | .....      | .....           |
| HB3                 | .....      | .....           |
| 7G8                 | .....      | .....           |
| <i>P.reichenowi</i> | .....      | .....           |

PF13\_0192

```
          10          20          30          40          50          60          70          80
PF13_0192  ....|....| ....|....| ....|....| ....|....| ....|....| ....|....| ....|....|
3D7        ATGACGGTAC AGTATAATAG AATTATTTT CTACCAATCA GTTCTAATT TTTTATATAT AGTATTTTAT TTTATTAGA
RO33
Palo Alto
FCR3
Wellcome
D6
T996
T9102
K1
Dd2
D10
FCC2
HB3
7G8
P.reichenowi
```

```
          90          100         110         120         130         140         150         160
PF13_0192  ....|....| ....|....| ....|....| ....|....| ....|....| ....|....| ....|....|
3D7        ATATTAAAG GATTCCCAA AAAAAAAAAA AAAAAAAAAA ATGAAAAGCA AAAAAATAAT ATGTTTATCT TGCTATTTT
RO33
Palo Alto
FCR3
Wellcome
D6
T996
T9102
K1
Dd2
D10
FCC2
HB3
7G8
P.reichenowi
```

```
          170         180         190         200         210         220         230         240
PF13_0192  ....|....| ....|....| ....|....| ....|....| ....|....| ....|....| ....|....|
3D7        TAATATTTT AAGTGTAATA TTTTGTAGTG AACCAGATAC AAATTCATT GATGAAAATG TAAAGAAGAA TGAAGTTTT
RO33
Palo Alto
FCR3
Wellcome
D6
T996
T9102
K1
Dd2
D10
FCC2
HB3
7G8
P.reichenowi
```

```
          250         260         270         280         290         300         310         320
PF13_0192  ....|....| ....|....| ....|....| ....|....| ....|....| ....|....| ....|....|
3D7        AATGCCTTAA ATGAACATTT AGAAAAGTATA AGTAATATCG TAAAAGTAAA TATTATGGAT GCCCTTTCAA ATAACCCTTC
RO33
Palo Alto
FCR3
Wellcome
D6
T996
T9102
K1
Dd2
D10
FCC2
HB3
7G8
P.reichenowi
```





|                     | 970        | 980        | 990        | 1000       | 1010       | 1020       | 1030       | 1040       |
|---------------------|------------|------------|------------|------------|------------|------------|------------|------------|
| PF13_0192           | ACATATTTAA | GAAGACCTGA | AAAGAAAGAA | GAAACAAAAG | AATATCCTAA | CAATGGATGT | TCTGTAGTTC | AAATATCTAT |
| 3D7                 | .....      | .....      | .....      | .....      | .....      | .....      | .....      | .....      |
| RO33                | .....      | .....      | .....      | .....      | .....      | .....      | .....      | .....      |
| Palo Alto           | .....      | .A..       | .....      | .....      | .....      | .....      | .....      | .....      |
| FCR3                | .....      | .....      | .....      | .....      | .....      | .....      | .....      | .....      |
| Wellcome            | .....      | .....      | .....      | .....      | .....      | .....      | .....      | .....      |
| D6                  | .....      | .A..       | .....      | .....      | .....      | .....      | .....      | .....      |
| T996                | .....      | .A..       | .....      | .....      | .....      | .....      | .....      | .....      |
| T9102               | .....      | .....      | .....      | .....      | .....      | .....      | .....      | .....      |
| K1                  | .....      | .....      | .....      | .....      | .....      | .....      | .....      | .....      |
| Dd2                 | .....      | .....      | .....      | .....      | .....      | .....      | .....      | .....      |
| D10                 | .....      | .A..       | .....      | .....      | .....      | .....      | .....      | .....      |
| FCC2                | .....      | .....      | .....      | .....      | .....      | .....      | .....      | .....      |
| HB3                 | .....      | .....      | .....      | .....      | .....      | .....      | .....      | .....      |
| 7G8                 | .....      | .A..       | .....      | .....      | .....      | .....      | .....      | .....      |
| <i>P.reichenowi</i> | .....      | .A..       | .T..       | .....      | .....      | .....      | .G..       | .....      |

|                     | 1050       | 1060      | 1070      | 1080       | 1090       | 1100       | 1110      | 1120      |
|---------------------|------------|-----------|-----------|------------|------------|------------|-----------|-----------|
| PF13_0192           | AGTAACTAAT | GAAGATTTT | TAAAAAAGT | TAGAGAAAGA | AATAAAAAGA | GAAATAATAA | AAAAGAACA | AATATTATG |
| 3D7                 | .....      | .....     | .....     | .....      | .....      | .....      | .....     | .....     |
| RO33                | .....      | .....     | .....     | .....      | .....      | .....      | .....     | .....     |
| Palo Alto           | .....      | .....     | .....     | .....      | .....      | .....      | .....     | .....     |
| FCR3                | .....      | .....     | .....     | .....      | .....      | .....      | .....     | .....     |
| Wellcome            | .....      | .....     | .....     | .....      | .....      | .....      | .....     | .....     |
| D6                  | .....      | .....     | .....     | .....      | .....      | .....      | .....     | .....     |
| T996                | .....      | .....     | .....     | .....      | .....      | .....      | .....     | .....     |
| T9102               | .....      | .....     | .....     | .....      | .....      | .....      | .....     | .....     |
| K1                  | .....      | .....     | .....     | .....      | .....      | .....      | .....     | .....     |
| Dd2                 | .....      | .....     | .....     | .....      | .....      | .....      | .....     | .....     |
| D10                 | .....      | .....     | .....     | .....      | .....      | .....      | .....     | .....     |
| FCC2                | .....      | .....     | .....     | .....      | .....      | .....      | .....     | .....     |
| HB3                 | .....      | .....     | .....     | .....      | .....      | .....      | .....     | .....     |
| 7G8                 | .....      | .....     | .....     | .....      | .....      | .....      | .....     | .....     |
| <i>P.reichenowi</i> | .....      | .....     | .....     | .....      | .....      | .....      | .....     | .TA..     |

|                     | 1130       | 1140       | 1150       | 1160       | 1170       | 1180       | 1190       | 1200       |
|---------------------|------------|------------|------------|------------|------------|------------|------------|------------|
| PF13_0192           | ATAGTGATGA | AGAATCAGAA | AGTTCAGAAG | AAACAAGTAA | AGATCCCTAT | TCATCGGGTC | CATATACAGT | TGATCATAAA |
| 3D7                 | .....      | .....      | .....      | .....      | .....      | .....      | .....      | .....      |
| RO33                | .....      | .....      | .....      | .....      | .....      | .....      | .....      | .....      |
| Palo Alto           | .....      | .....      | .....      | .....      | .....      | .....      | .....      | .....      |
| FCR3                | .....      | .....      | .....      | .....      | .....      | .....      | .....      | .....      |
| Wellcome            | .....      | .....      | .....      | .....      | .....      | .....      | .....      | .....      |
| D6                  | .....      | .....      | .....      | .....      | .....      | .....      | .....      | .....      |
| T996                | .....      | .....      | .....      | .....      | .....      | .....      | .....      | .....      |
| T9102               | .....      | .....      | .....      | .....      | .....      | .....      | .....      | .....      |
| K1                  | .....      | .....      | .....      | .....      | .....      | .....      | .....      | .....      |
| Dd2                 | .....      | .....      | .....      | .....      | .....      | .....      | .....      | .....      |
| D10                 | .....      | .....      | .....      | .....      | .....      | .....      | .....      | .....      |
| FCC2                | .....      | .....      | .....      | .....      | .....      | .....      | .....      | .....      |
| HB3                 | .....      | .....      | .....      | .....      | .....      | .....      | .....      | .....      |
| 7G8                 | .....      | .....      | .....      | .....      | .....      | .....      | .....      | .....      |
| <i>P.reichenowi</i> | .....      | .A..       | .....      | .A..       | .....      | .A..       | .C..       | .A..       |

|                     | 1210      | 1220      | 1230      | 1240       | 1250      | 1260       | 1270       | 1280       |
|---------------------|-----------|-----------|-----------|------------|-----------|------------|------------|------------|
| PF13_0192           | AATGAAATT | GTTTTCTTA | CAAGCAAAT | TCAGATATTC | ATCCAATAT | AAATAATGAT | -----      | -----      |
| 3D7                 | .....     | .....     | .....     | .....      | .....     | .....      | -----      | -----      |
| RO33                | .....     | .....     | .....     | .....      | .....     | .....      | AATAATGAAA | ATAATGATAA |
| Palo Alto           | .....     | .....     | .....     | .....      | .....     | .....      | -----      | -----      |
| FCR3                | .....     | .....     | .....     | .....      | .....     | .....      | -----      | -----      |
| Wellcome            | .....     | .....     | .....     | .....      | .....     | .....      | -----      | -----      |
| D6                  | .....     | .....     | .....     | .....      | .....     | .....      | AATAATGAA- | -----      |
| T996                | .....     | .....     | .....     | .....      | .....     | .....      | AATAATGATA | ATAATGAAAA |
| T9102               | .....     | .....     | .....     | .....      | .....     | .....      | -----      | -----      |
| K1                  | .....     | .....     | .....     | .....      | .....     | .....      | -----      | -----      |
| Dd2                 | .....     | .....     | .....     | .....      | .....     | .....      | -----      | -----      |
| D10                 | .....     | .....     | .....     | .....      | .....     | .....      | -----      | -----      |
| FCC2                | .....     | .....     | .....     | .....      | .....     | .....      | -----      | -----      |
| HB3                 | .....     | .....     | .....     | .....      | .....     | .....      | -----      | -----      |
| 7G8                 | .....     | .....     | .....     | .....      | .....     | .....      | AATAATGATA | ATAATGAAAA |
| <i>P.reichenowi</i> | .....     | .A..T..   | .....     | .G..       | .....     | .A..       | -----      | -----      |

|                     | 1290                                                  | 1300       | 1310       | 1320       | 1330       | 1340       | 1350       | 1360       |
|---------------------|-------------------------------------------------------|------------|------------|------------|------------|------------|------------|------------|
| PF13_0192           | ..... ..... ..... ..... ..... ..... ..... ..... ..... |            |            |            |            |            |            | AATAATGATA |
| 3D7                 | ----- ----- ----- ----- ----- ----- ----- ----- ----- |            |            |            |            |            |            |            |
| RO33                | TAATGAAAT                                             | AATGATAATA | ATGAAAATAA | T-----     | -----      | -----GA    | TAATAATGAA | .....      |
| Palo Alto           | ----- ----- ----- ----- ----- ----- ----- ----- ----- |            |            |            |            |            |            |            |
| FCR3                | ----- ----- ----- ----- ----- ----- ----- ----- ----- |            |            |            |            |            |            |            |
| Wellcome            | ----- ----- ----- ----- ----- ----- ----- ----- ----- |            |            |            |            |            |            |            |
| D6                  | ----- ----- ----- ----- ----- ----- ----- ----- ----- |            |            |            |            |            |            |            |
| T996                | TAATGATAAT                                            | AATGAAAATA | ATGAT----  | -----      | -----      | -----      | -----      | .....      |
| T9102               | ----- ----- ----- ----- ----- ----- ----- ----- ----- |            |            |            |            |            |            |            |
| K1                  | ----- ----- ----- ----- ----- ----- ----- ----- ----- |            |            |            |            |            |            |            |
| Dd2                 | ----- ----- ----- ----- ----- ----- ----- ----- ----- |            |            |            |            |            |            |            |
| D10                 | ----- ----- ----- ----- ----- ----- ----- ----- ----- |            |            |            |            |            |            |            |
| FCC2                | ----- ----- ----- ----- ----- ----- ----- ----- ----- |            |            |            |            |            |            |            |
| HB3                 | ----- ----- ----- ----- ----- ----- ----- ----- ----- |            |            |            |            |            |            |            |
| 7G8                 | TAATGATAAT                                            | AATGAAAATA | ATGATAATAA | TGAAAATAAT | GATAATAATG | AAAATAATGA | TAATAATGAA | .....      |
| <i>P.reichenowi</i> | ----- ----- ----- ----- ----- ----- ----- ----- ----- |            |            |            |            |            |            |            |

|                     | 1370                                                  | 1380       | 1390       | 1400       | 1410   | 1420   | 1430       | 1440       |
|---------------------|-------------------------------------------------------|------------|------------|------------|--------|--------|------------|------------|
| PF13_0192           | ..... ..... ..... ..... ..... ..... ..... ..... ..... |            |            |            |        |        |            |            |
| 3D7                 | ATAATGAAA                                             | TAATGATAAT | AATGAAAATA | ATGATAATAA | T----- | -----A | TACCTGTTAA | TAATAAAAAA |
| RO33                | ----- ----- ----- ----- ----- ----- ----- ----- ----- |            |            |            |        |        |            |            |
| Palo Alto           | ----- ----- ----- ----- ----- ----- ----- ----- ----- |            |            |            |        |        |            |            |
| FCR3                | ----- ----- ----- ----- ----- ----- ----- ----- ----- |            |            |            |        |        |            |            |
| Wellcome            | ----- ----- ----- ----- ----- ----- ----- ----- ----- |            |            |            |        |        |            |            |
| D6                  | ----- ----- ----- ----- ----- ----- ----- ----- ----- |            |            |            |        |        |            |            |
| T996                | ----- ----- ----- ----- ----- ----- ----- ----- ----- |            |            |            |        |        |            |            |
| T9102               | ----- ----- ----- ----- ----- ----- ----- ----- ----- |            |            |            |        |        |            |            |
| K1                  | ----- ----- ----- ----- ----- ----- ----- ----- ----- |            |            |            |        |        |            |            |
| Dd2                 | ----- ----- ----- ----- ----- ----- ----- ----- ----- |            |            |            |        |        |            |            |
| D10                 | ----- ----- ----- ----- ----- ----- ----- ----- ----- |            |            |            |        |        |            |            |
| FCC2                | ----- ----- ----- ----- ----- ----- ----- ----- ----- |            |            |            |        |        |            |            |
| HB3                 | ----- ----- ----- ----- ----- ----- ----- ----- ----- |            |            |            |        |        |            |            |
| 7G8                 | ----- ----- ----- ----- ----- ----- ----- ----- ----- |            |            |            |        |        |            |            |
| <i>P.reichenowi</i> | ----- ----- ----- ----- ----- ----- ----- ----- ----- |            |            |            |        |        |            |            |

|                     | 1450                                                  | 1460       | 1470      | 1480     | 1490      | 1500       | 1510      | 1520      |
|---------------------|-------------------------------------------------------|------------|-----------|----------|-----------|------------|-----------|-----------|
| PF13_0192           | ..... ..... ..... ..... ..... ..... ..... ..... ..... |            |           |          |           |            |           |           |
| 3D7                 | AATCTCATA                                             | CTCCTCATGT | ACCAAAGAT | ACCAAATA | ATATAGAAA | AAATCATAGT | AACATAATT | ACAACCAAT |
| RO33                | ----- ----- ----- ----- ----- ----- ----- ----- ----- |            |           |          |           |            |           |           |
| Palo Alto           | ----- ----- ----- ----- ----- ----- ----- ----- ----- |            |           |          |           |            |           |           |
| FCR3                | ----- ----- ----- ----- ----- ----- ----- ----- ----- |            |           |          |           |            |           |           |
| Wellcome            | ----- ----- ----- ----- ----- ----- ----- ----- ----- |            |           |          |           |            |           |           |
| D6                  | ----- ----- ----- ----- ----- ----- ----- ----- ----- |            |           |          |           |            |           |           |
| T996                | ----- ----- ----- ----- ----- ----- ----- ----- ----- |            |           |          |           |            |           |           |
| T9102               | ----- ----- ----- ----- ----- ----- ----- ----- ----- |            |           |          |           |            |           |           |
| K1                  | ----- ----- ----- ----- ----- ----- ----- ----- ----- |            |           |          |           |            |           |           |
| Dd2                 | ----- ----- ----- ----- ----- ----- ----- ----- ----- |            |           |          |           |            |           |           |
| D10                 | ----- ----- ----- ----- ----- ----- ----- ----- ----- |            |           |          |           |            |           |           |
| FCC2                | ----- ----- ----- ----- ----- ----- ----- ----- ----- |            |           |          |           |            |           |           |
| HB3                 | ----- ----- ----- ----- ----- ----- ----- ----- ----- |            |           |          |           |            |           |           |
| 7G8                 | ----- ----- ----- ----- ----- ----- ----- ----- ----- |            |           |          |           |            |           |           |
| <i>P.reichenowi</i> | ----- ----- ----- ----- ----- ----- ----- ----- ----- |            |           |          |           |            |           |           |

|                     | 1530                                                  | 1540       | 1550       | 1560       | 1570       | 1580    | 1590 | 1600       |
|---------------------|-------------------------------------------------------|------------|------------|------------|------------|---------|------|------------|
| PF13_0192           | ..... ..... ..... ..... ..... ..... ..... ..... ..... |            |            |            |            |         |      |            |
| 3D7                 | TAATCAAGAA                                            | AATTTATCAA | TGTATTTTAA | TAATAATAAT | AAGAAGAAGA | AT----- | AAA  | AAGAATAGTC |
| RO33                | ----- ----- ----- ----- ----- ----- ----- ----- ----- |            |            |            |            |         |      |            |
| Palo Alto           | ----- ----- ----- ----- ----- ----- ----- ----- ----- |            |            |            |            |         |      |            |
| FCR3                | ----- ----- ----- ----- ----- ----- ----- ----- ----- |            |            |            |            |         |      |            |
| Wellcome            | ----- ----- ----- ----- ----- ----- ----- ----- ----- |            |            |            |            |         |      |            |
| D6                  | ----- ----- ----- ----- ----- ----- ----- ----- ----- |            |            |            |            |         |      |            |
| T996                | ----- ----- ----- ----- ----- ----- ----- ----- ----- |            |            |            |            |         |      |            |
| T9102               | ----- ----- ----- ----- ----- ----- ----- ----- ----- |            |            |            |            |         |      |            |
| K1                  | ----- ----- ----- ----- ----- ----- ----- ----- ----- |            |            |            |            |         |      |            |
| Dd2                 | ----- ----- ----- ----- ----- ----- ----- ----- ----- |            |            |            |            |         |      |            |
| D10                 | ----- ----- ----- ----- ----- ----- ----- ----- ----- |            |            |            |            |         |      |            |
| FCC2                | ----- ----- ----- ----- ----- ----- ----- ----- ----- |            |            |            |            |         |      |            |
| HB3                 | ----- ----- ----- ----- ----- ----- ----- ----- ----- |            |            |            |            |         |      |            |
| 7G8                 | ----- ----- ----- ----- ----- ----- ----- ----- ----- |            |            |            |            |         |      |            |
| <i>P.reichenowi</i> | ----- ----- ----- ----- ----- ----- ----- ----- ----- |            |            |            |            |         |      |            |









|                     |            |            |            |            |            |            |            |            |
|---------------------|------------|------------|------------|------------|------------|------------|------------|------------|
|                     | 410        | 420        | 430        | 440        | 450        | 460        | 470        | 480        |
| PF13_0194           | ATGAACATGT | TAATACTCCT | TTCTCTACAA | CTTTTAAAAA | TGCATTAGAA | AAAGATGAAT | TCCGTGATAG | TATCACGAAA |
| 3D7                 | .....      | .....      | .....      | .....      | .....      | .....      | .....      | .....      |
| RO33                | .....      | .....      | .....      | .....      | .....      | .....      | .....      | .....      |
| Palo Alto           | .....      | .....      | .....      | .....      | .....      | .....      | .....      | .....      |
| FCR3                | .....      | .....      | .....      | .....      | .....      | .....      | .....      | .....      |
| Wellcome            | .....      | .....      | .....      | .....      | .....      | .....      | .....      | .....      |
| D6                  | .....      | .....      | .....      | .....      | .....      | .....      | .....      | .....      |
| T996                | .....      | .....      | .....      | .....      | .....      | .....      | .....      | .....      |
| T9102               | .....      | .....      | .....      | .....      | .....      | .....      | .....      | .....      |
| K1                  | .....      | .....      | .....      | .....      | .....      | .....      | .....      | .....      |
| D10                 | .....      | .....      | .....      | .....      | .....      | .....      | .....      | .....      |
| FCC2                | .....      | .....      | .....      | .....      | .....      | .....      | .....      | .....      |
| HB3                 | .....      | .....      | .....      | .....      | .....      | .....      | .....      | .....      |
| 7G8                 | .....      | .....      | .....      | .....      | .....      | .....      | .....      | .....      |
| <i>P.reichenowi</i> | .....      | .....      | .....      | .....      | .....      | .....      | .....      | CC.....    |

|                     |            |            |            |            |            |            |            |            |
|---------------------|------------|------------|------------|------------|------------|------------|------------|------------|
|                     | 490        | 500        | 510        | 520        | 530        | 540        | 550        | 560        |
| PF13_0194           | TTAACAGAAG | CACTATGTGG | ACATACAAAA | GATAATCATA | ATAATTTAAG | AGGAACTAGC | CAAAATGATT | CAGACTATTT |
| 3D7                 | .....      | .....      | .....      | .....      | .....      | .....      | .....      | .....      |
| RO33                | .....      | .....      | .....      | .....      | .....      | .....      | .....      | .....      |
| Palo Alto           | .....      | .....      | .....      | .....      | .....      | .....      | .....      | .....      |
| FCR3                | .....      | .....      | .....      | .....      | .....      | .....      | .....      | .....      |
| Wellcome            | .....      | .....      | .....      | .....      | .....      | .....      | .....      | .....      |
| D6                  | .....      | .....      | .....      | .....      | .....      | .....      | .....      | .....      |
| T996                | .....      | .....      | .....      | .....      | .....      | .....      | .....      | .....      |
| T9102               | .....      | .....      | .....      | .....      | .....      | .....      | .....      | .....      |
| K1                  | .....      | .....      | .....      | .....      | .....      | .....      | .....      | .....      |
| D10                 | .....      | .....      | .....      | .....      | .....      | .....      | .....      | .....      |
| FCC2                | .....      | .....      | .....      | .....      | .....      | .....      | .....      | .....      |
| HB3                 | .....      | .....      | .....      | .....      | .....      | .....      | .....      | .....      |
| 7G8                 | .....      | .....      | .....      | .....      | .....      | .....      | .....      | .....      |
| <i>P.reichenowi</i> | .....      | .....      | .....      | .....      | .....      | .....      | .....      | .....      |

|                     |            |            |            |            |           |
|---------------------|------------|------------|------------|------------|-----------|
|                     | 570        | 580        | 590        | 600        |           |
| PF13_0194           | ACATTCAGTA | TATGATAAGG | CCCTTTCTCA | TTTAGATACC | TTACAATAA |
| 3D7                 | .....      | .....      | .....      | .....      | .....     |
| RO33                | .....      | .....      | .....      | .....      | .....     |
| Palo Alto           | .....      | .....      | .....      | .....      | .....     |
| FCR3                | .....      | .....      | .....      | .....      | .....     |
| Wellcome            | .....      | .....      | .....      | .....      | .....     |
| D6                  | .....      | .....      | .....      | .....      | .....     |
| T996                | .....      | .....      | .....      | .....      | .....     |
| T9102               | .....      | .....      | .....      | .....      | .....     |
| K1                  | .....      | .....      | .....      | .....      | .....     |
| D10                 | .....      | .....      | .....      | .....      | .....     |
| FCC2                | .....      | .....      | .....      | .....      | .....     |
| HB3                 | .....      | .....      | .....      | .....      | .....     |
| 7G8                 | .....      | .....      | .....      | .....      | .....     |
| <i>P.reichenowi</i> | .....      | .....      | .....      | .....      | .....     |

MSP9 - ABRA FCC1\_HN

|                     |            |            |            |            |            |            |            |            |
|---------------------|------------|------------|------------|------------|------------|------------|------------|------------|
|                     | 10         | 20         | 30         | 40         | 50         | 60         | 70         | 80         |
| PFL1385c            | ATGATGAACA | TGAAAATTGT | TTTATTCAGT | TTATTGCTCT | TTGTCATAAG | ATGGAATATT | ATTAGTTGTA | ATAAAAACGA |
| 3D7                 |            |            |            |            |            |            |            |            |
| RO33                |            |            |            |            |            |            |            |            |
| Palo Alto           |            |            |            |            |            |            |            |            |
| FCR3                |            |            |            |            |            |            |            |            |
| Wellcome            |            |            |            |            |            |            |            |            |
| D6                  |            |            |            |            |            |            |            |            |
| T996                |            |            |            |            |            |            |            |            |
| T9102               |            |            |            |            |            |            |            |            |
| K1                  |            |            |            |            |            |            |            |            |
| Dd2                 |            |            |            |            |            |            |            |            |
| D10                 |            |            |            |            |            |            |            |            |
| FCC2                |            |            |            |            |            |            |            |            |
| HB3                 |            |            |            |            |            |            |            |            |
| 7G8                 |            |            |            |            |            |            |            |            |
| <i>P.reichenowi</i> |            |            |            |            |            |            |            |            |

|                     |            |           |           |            |           |            |            |           |
|---------------------|------------|-----------|-----------|------------|-----------|------------|------------|-----------|
|                     | 90         | 100       | 110       | 120        | 130       | 140        | 150        | 160       |
| PFL1385c            | CAAGAACCAA | GGTGTGATA | TGAATGTTT | GAATAATTAT | GAAAATTAT | TTAAATTTGT | TAAATGTGAA | TATGTAATG |
| 3D7                 |            |           |           |            |           |            |            |           |
| RO33                |            |           |           |            |           |            |            |           |
| Palo Alto           |            |           |           |            |           |            |            |           |
| FCR3                |            |           |           |            |           | .G.        |            |           |
| Wellcome            |            |           |           |            |           | .G.        |            |           |
| D6                  |            |           |           |            |           |            |            |           |
| T996                |            |           |           |            |           |            |            |           |
| T9102               |            |           |           |            |           | .G.        |            |           |
| K1                  |            |           |           |            |           | .G.        |            |           |
| Dd2                 |            |           |           |            |           | .G.        |            |           |
| D10                 |            |           |           |            |           |            |            |           |
| FCC2                |            |           |           |            |           | .G.        |            |           |
| HB3                 |            |           |           |            |           | .G.        |            |           |
| 7G8                 |            |           |           |            |           |            |            |           |
| <i>P.reichenowi</i> |            |           |           |            |           | .A.A.      |            | .C.       |

|                     |            |            |            |            |            |            |            |            |
|---------------------|------------|------------|------------|------------|------------|------------|------------|------------|
|                     | 170        | 180        | 190        | 200        | 210        | 220        | 230        | 240        |
| PFL1385c            | AACATACTTA | TGTTAAAGGT | AAGAAAGCTC | CTTCAGATCC | TCAATGTGCT | GATATAAAAG | AAGAATGCAA | AGAATTACTT |
| 3D7                 |            |            |            |            |            |            |            |            |
| RO33                |            |            |            |            |            |            |            |            |
| Palo Alto           |            |            |            |            |            |            |            |            |
| FCR3                |            |            |            |            |            |            |            |            |
| Wellcome            |            |            |            |            |            |            |            |            |
| D6                  |            |            |            |            |            |            |            |            |
| T996                |            |            |            |            |            |            |            |            |
| T9102               |            |            |            |            |            |            |            |            |
| K1                  |            |            |            |            |            |            |            |            |
| Dd2                 |            |            |            |            |            |            |            |            |
| D10                 |            |            |            |            |            |            |            |            |
| FCC2                |            |            |            |            |            |            |            |            |
| HB3                 |            |            |            |            |            |            |            |            |
| 7G8                 |            |            |            |            |            |            |            |            |
| <i>P.reichenowi</i> |            |            | .GC.T AC.  |            |            | .C.        |            |            |

|                     |            |            |            |            |           |            |            |           |
|---------------------|------------|------------|------------|------------|-----------|------------|------------|-----------|
|                     | 250        | 260        | 270        | 280        | 290       | 300        | 310        | 320       |
| PFL1385c            | AAGGAAAAAC | AATACACAGA | TTCAGTTACA | TATTTAATGG | ATGGTTTAA | ATCAGCAAAT | AATTCAGCAA | ATAAT---- |
| 3D7                 |            |            |            |            |           |            |            | -----     |
| RO33                |            |            |            |            |           |            |            | -----     |
| Palo Alto           |            |            |            |            |           |            |            | -----     |
| FCR3                |            |            |            |            |           |            |            | -----     |
| Wellcome            |            |            |            |            |           |            |            | -----     |
| D6                  |            |            |            |            |           |            |            | TCAGC     |
| T996                |            |            |            |            |           |            |            | -----     |
| T9102               |            |            |            |            |           |            |            | -----     |
| K1                  |            |            |            |            |           |            |            | -----     |
| Dd2                 |            |            |            |            |           |            |            | -----     |
| D10                 |            |            |            |            |           |            |            | -----     |
| FCC2                |            |            |            |            |           |            |            | -----     |
| HB3                 |            |            |            |            |           |            |            | -----     |
| 7G8                 |            |            |            |            |           |            |            | -----     |
| <i>P.reichenowi</i> | .A.        | .G         |            | .A.        |           |            | .G.T.A.    | -----     |

|                     | 330     | 340       | 350        | 360        | 370        | 380        | 390        | 400         |
|---------------------|---------|-----------|------------|------------|------------|------------|------------|-------------|
| PFL1385c            | GGT     | AAAAAAATA | ACGCTGAAGA | AATGAAAAAT | TTAGTAAATT | TCTTACAATC | TCATAAGAAA | TTAATTTAAAG |
| 3D7                 | .....   | .....     | .....      | .....      | .....      | .....      | .....      | .....       |
| RO33                | .....   | .....     | .....      | .....      | .....      | .....      | .....      | .....       |
| Palo Alto           | .....   | .....     | .....      | .....      | .....      | .....      | .....      | .....       |
| FCR3                | .....   | .....     | .....      | .....      | .....      | .....      | .....      | .....       |
| Wellcome            | .....   | .....     | .....      | .....      | .....      | .....      | .....      | .....       |
| D6                  | AAATAAT | .....     | .....      | .....      | .....      | .....      | .....      | .....       |
| T996                | .....   | .....     | .....      | .....      | .....      | .....      | .....      | .....       |
| T9102               | .....   | .....     | .....      | .....      | .....      | .....      | .....      | .....       |
| K1                  | .....   | .....     | .....      | .....      | .....      | .....      | .....      | .....       |
| Dd2                 | .....   | .....     | .....      | .....      | .....      | .....      | .....      | .....       |
| D10                 | .....   | .....     | .....      | .....      | .....      | .....      | .....      | .....       |
| FCC2                | .....   | .....     | .....      | .....      | .....      | .....      | .....      | .....       |
| HB3                 | .....   | .....     | .....      | .....      | .....      | .....      | .....      | .....       |
| 7G8                 | .....   | .....     | .....      | .....      | .....      | .....      | .....      | .....       |
| <i>P.reichenowi</i> | -----A  | .....     | .....      | .....      | .....      | .....      | .....      | .....       |

|                     | 410       | 420        | 430        | 440         | 450        | 460        | 470        | 480        |
|---------------------|-----------|------------|------------|-------------|------------|------------|------------|------------|
| PFL1385c            | CATTAAAAA | GAATATTGAA | AGTATACAAA | ATAAGAAAACA | CTTAATTTAT | AAAAACAAAT | CATATAATCC | ATTATTACTT |
| 3D7                 | .....     | .....      | .....      | .....       | .....      | .....      | .....      | .....      |
| RO33                | .....     | .....      | .....      | .....       | .....      | .....      | .....      | .....      |
| Palo Alto           | .....     | .....      | .....      | .....       | .....      | .....      | .....      | .....      |
| FCR3                | .....     | .....      | .....      | .....       | .....      | .....      | .....      | .....      |
| Wellcome            | .....     | .....      | .....      | .....       | .....      | .....      | .....      | .....      |
| D6                  | .....     | .....      | .....      | .....       | .....      | .....      | .....      | .....      |
| T996                | .....     | .....      | .....      | .....       | .....      | .....      | .....      | .....      |
| T9102               | .....     | .....      | .....      | .....       | .....      | .....      | .....      | .....      |
| K1                  | .....     | .....      | .....      | .....       | .....      | .....      | .....      | .....      |
| Dd2                 | .....     | .....      | .....      | .....       | .....      | .....      | .....      | .....      |
| D10                 | .....     | .....      | .....      | .....       | .....      | .....      | .....      | .....      |
| FCC2                | .....     | .....      | .....      | .....       | .....      | .....      | .....      | .....      |
| HB3                 | .....     | .....      | .....      | .....       | .....      | .....      | .....      | .....      |
| 7G8                 | .....     | .....      | .....      | .....       | .....      | .....      | .....      | .....      |
| <i>P.reichenowi</i> | G.....    | .....      | .....      | .....T      | .....G     | .....      | .....T     | .....      |

|                     | 490        | 500        | 510        | 520        | 530        | 540        | 550        | 560        |
|---------------------|------------|------------|------------|------------|------------|------------|------------|------------|
| PFL1385c            | TCTTGTGTTA | AAAAAATGAA | TATGTTAAAA | GAAAATGTTG | ACTATATTCA | AAAAAATCAA | AACTTATTTA | AAGAATTAAT |
| 3D7                 | .....      | .....      | .....      | .....      | .....      | .....      | .....      | .....      |
| RO33                | .....      | .....      | .....      | .....      | .....      | .....      | .....      | .....      |
| Palo Alto           | .....      | .....      | .....      | .....      | .....      | .....      | .....      | .....      |
| FCR3                | .....      | .....      | .....      | .....      | .....      | .....      | .....      | .....      |
| Wellcome            | .....      | .....      | .....      | .....      | .....      | .....      | .....      | .....      |
| D6                  | .....      | .....      | .....      | .....      | .....      | .....      | .....      | .....      |
| T996                | .....      | .....      | .....      | .....      | .....      | .....      | .....      | .....      |
| T9102               | .....      | .....      | .....      | .....      | .....      | .....      | .....      | .....      |
| K1                  | .....      | .....      | .....      | .....      | .....      | .....      | .....      | .....      |
| Dd2                 | .....      | .....      | .....      | .....      | .....      | .....      | .....      | .....      |
| D10                 | .....      | .....      | .....      | .....      | .....      | .....      | .....      | .....      |
| FCC2                | .....      | .....      | .....      | .....      | .....      | .....      | .....      | .....      |
| HB3                 | .....      | .....      | .....      | .....      | .....      | .....      | .....      | .....      |
| 7G8                 | .....      | .....      | .....      | .....      | .....      | .....      | .....      | .....      |
| <i>P.reichenowi</i> | A...T      | .....      | .....      | .....      | .....      | .....G     | .....      | .....      |

|                     | 570        | 580        | 590       | 600        | 610        | 620        | 630        | 640        |
|---------------------|------------|------------|-----------|------------|------------|------------|------------|------------|
| PFL1385c            | GAATCAAAAA | GCTACCTACT | CTTTGTTAA | TACCAAAAAA | AAAATTATTI | CTTTAAAATC | ACAAGGTCAT | AAAAAAGAAA |
| 3D7                 | .....      | .....      | .....     | .....      | .....      | .....      | .....      | .....      |
| RO33                | .....      | .....      | .....     | .....      | .....      | .....      | .....      | .....      |
| Palo Alto           | .....      | .....      | .....     | .....      | .....      | .....      | .....      | .....      |
| FCR3                | .....      | .....      | .....     | .....      | .....      | .....      | .....      | .....      |
| Wellcome            | .....      | .....      | .....     | .....      | .....      | .....      | .....      | .....      |
| D6                  | .....      | .....      | .....     | .....      | .....      | .....      | .....      | .....      |
| T996                | .....      | .....      | .....     | .....      | .....      | .....      | .....      | .....      |
| T9102               | .....      | .....      | .....     | .....      | .....      | .....      | .....      | .....      |
| K1                  | .....      | .....      | .....     | .....      | .....      | .....      | .....      | .....      |
| Dd2                 | .....      | .....      | .....     | .....      | .....      | .....      | .....      | .....      |
| D10                 | .....      | .....      | .....     | .....      | .....      | .....      | .....      | .....      |
| FCC2                | .....      | .....      | .....     | .....      | .....      | .....      | .....      | .....      |
| HB3                 | .....      | .....      | .....     | .....      | .....      | .....      | .....      | .....      |
| 7G8                 | .....      | .....      | .....     | .....      | .....      | .....      | .....      | .....      |
| <i>P.reichenowi</i> | G.....     | T...A...CT | .....     | .....G     | .....      | .....C     | .....      | .....      |

|                     | 650       | 660        | 670         | 680        | 690        | 700        | 710               | 720        |
|---------------------|-----------|------------|-------------|------------|------------|------------|-------------------|------------|
| PFL1385c            | CCTCACAAA | TCAAAATGAA | AATAACGACA  | ATCAAAAATA | TCAAGAAGTT | AATGATGAAG | ATGATGTAAA        | TGATGAAGAA |
| 3D7                 | .....     | .....      | .....       | .....      | .....      | .....      | .....             | .....      |
| RO33                | .....     | .....      | .....       | .....      | .....      | .....      | .....             | .....      |
| Palo Alto           | .....     | .....      | .....       | .....      | .....      | .....      | .....             | .....      |
| FCR3                | .....     | .....      | .....       | .....      | .....      | .....      | .....             | .....      |
| Wellcome            | .....     | .....      | .....       | .....      | .....      | .....      | .....             | .....      |
| D6                  | .....     | .....      | .....       | .....      | .....      | .....      | .....             | .....      |
| T996                | .....     | .....      | .....       | .....      | .....      | .....      | .....             | .....      |
| T9102               | .....     | .....      | .....       | .....      | .....      | .....      | .....             | .....      |
| K1                  | .....     | .....      | .....       | .....      | .....      | .....      | .....             | .....      |
| Dd2                 | .....     | .....      | .....       | .....      | .....      | .....      | .....             | .....      |
| D10                 | .....     | .....      | .....       | .....      | .....      | .....      | .....             | .....      |
| FCC2                | .....     | .....      | .....       | .....      | .....      | .....      | .....             | .....      |
| HB3                 | .....     | .....      | .....       | .....      | .....      | .....      | .....             | .....      |
| 7G8                 | .....     | .....      | .....       | .....      | .....      | .....      | .....             | .....      |
| <i>P.reichenowi</i> | .....     | .....      | .....G..... | .....      | .....      | .....      | .....A..A..T..... | .....      |

|                     | 730       | 740        | 750        | 760        | 770        | 780        | 790        | 800        |
|---------------------|-----------|------------|------------|------------|------------|------------|------------|------------|
| PFL1385c            | GATACAAAG | ATGACGAAGA | TACTAACGAT | GAAGAAGATA | CAAACGATGA | CGAAGATACA | AATGATGACG | AAGATACTAA |
| 3D7                 | .....     | .....      | .....      | .....      | .....      | .....      | .....      | .....      |
| RO33                | .....     | .....      | .....      | .....      | .....      | .....      | .....      | .....      |
| Palo Alto           | .....     | .....      | .....      | .....      | .....      | .....      | .....      | .....      |
| FCR3                | .....     | .....      | .....      | .....      | .....      | .....      | .....      | .....      |
| Wellcome            | .....     | .....      | .....      | .....      | .....      | .....      | .....      | .....      |
| D6                  | .....     | .....      | .....      | .....      | .....      | .....      | .....      | .....      |
| T996                | .....     | .....      | .....      | .....      | .....      | .....      | .....      | .....      |
| T9102               | .....     | .....      | .....      | .....      | .....      | .....      | .....      | .....      |
| K1                  | .....     | .....      | .....      | .....      | .....      | .....      | .....      | .....      |
| Dd2                 | .....     | .....      | .....      | .....      | .....      | .....      | .....      | .....      |
| D10                 | .....     | .....      | .....      | .....      | .....      | .....      | .....      | .....      |
| FCC2                | .....     | .....      | .....      | .....      | .....      | .....      | .....      | .....      |
| HB3                 | .....     | .....      | .....      | .....      | .....      | .....      | .....      | .....      |
| 7G8                 | .....     | .....      | .....      | .....      | .....      | .....      | .....      | .....      |
| <i>P.reichenowi</i> | ..AGTT..T | ..A.....   | AGT..T..   | .....G     | TT..T..... | A.....GTT  | .....A     | .....GT..  |

|                     | 810        | 820        | 830        | 840        | 850        | 860        | 870        | 880        |
|---------------------|------------|------------|------------|------------|------------|------------|------------|------------|
| PFL1385c            | CGATGAAGAA | GATACTAACG | ACGAAGAAGA | TCATGAAAAT | AATAATGCTA | CAGCATACGA | ATTAGGTATC | GTCCCAGTTA |
| 3D7                 | .....      | .....      | .....      | .....      | .....      | .....      | .....      | .....      |
| RO33                | .....      | .....      | .....      | .....      | .....      | .....      | .....      | .....      |
| Palo Alto           | .....      | .....      | .....      | .....      | .....      | .....      | .....      | .....      |
| FCR3                | .....      | .....      | .....      | .....      | .....      | .....      | .....      | .....      |
| Wellcome            | .....      | .....      | .....      | .....      | .....      | .....      | .....      | .....      |
| D6                  | .....      | .....      | .....      | .....      | .....      | .....      | .....      | .....      |
| T996                | .....      | .....      | .....      | .....      | .....      | .....      | .....      | .....      |
| T9102               | .....      | .....      | .....      | .....      | .....      | .....      | .....      | .....      |
| K1                  | .....      | .....      | .....      | .....      | .....      | .....      | .....      | .....      |
| Dd2                 | .....      | .....      | .....      | .....      | .....      | .....      | .....      | .....      |
| D10                 | .....      | .....      | .....      | .....      | .....      | .....      | .....      | .....      |
| FCC2                | .....      | .....      | .....      | .....      | .....      | .....      | .....      | .....      |
| HB3                 | .....      | .....      | .....      | .....      | .....      | .....      | .....      | .....      |
| 7G8                 | .....      | .....      | .....      | .....      | .....      | .....      | .....      | .....      |
| <i>P.reichenowi</i> | T.....     | TTA..T.    | .T.....    | .....G..   | ..A.....   | .....GT    | .....      | .....      |

|                     | 890        | 900        | 910        | 920        | 930        | 940        | 950        | 960        |
|---------------------|------------|------------|------------|------------|------------|------------|------------|------------|
| PFL1385c            | ACGATGTGTT | AAATGTTAAT | ATGAAAAATA | TGATAACAGG | AAATAATTTT | ATGGATGTTG | TTAAAAATAC | ATTAGCTCAA |
| 3D7                 | .....      | .....      | .....      | .....      | .....      | .....      | .....      | .....      |
| RO33                | .....      | .....      | .....      | .....      | .....      | .....      | .....      | .....      |
| Palo Alto           | .....      | .....      | .....      | .....      | .....      | .....      | .....      | .....      |
| FCR3                | .....      | .....      | .....      | .....      | .....      | .....      | .....G..   | .....      |
| Wellcome            | .....      | .....      | .....      | .....      | .....      | .....      | .....G..   | .....      |
| D6                  | .....      | .....      | .....      | .....      | .....      | .....      | .....      | .....      |
| T996                | .....      | .....      | .....      | .....      | .....      | .....      | .....      | .....      |
| T9102               | .....      | .....      | .....      | .....      | .....      | .....      | .....G..   | .....      |
| K1                  | .....      | .....      | .....      | .....      | .....      | .....      | .....G..   | .....      |
| Dd2                 | .....      | .....      | .....      | .....      | .....      | .....      | .....G..   | .....      |
| D10                 | .....      | .....      | .....      | .....      | .....      | .....      | .....G..   | .....      |
| FCC2                | .....      | .....      | .....      | .....      | .....      | .....      | .....G..   | .....      |
| HB3                 | .....      | .....      | .....      | .....      | .....      | .....      | .....      | .....      |
| 7G8                 | .....      | .....      | .....      | .....      | .....      | .....      | .....      | .....      |
| <i>P.reichenowi</i> | .T..A..    | .....G..   | .....      | .....      | .....      | .....      | .....G..   | T.....     |

|                     | 970        | 980        | 990        | 1000       | 1010       | 1020       | 1030      | 1040       |
|---------------------|------------|------------|------------|------------|------------|------------|-----------|------------|
| PFL1385c            | TCAGGTGGAT | TAGGAAGTAA | TGATTTAATA | AATTTCTTAA | ATCAAGGTAA | AGAAATAGGA | GAAAATTAT | TAAACATAAC |
| 3D7                 | .....      | .....      | .....      | .....      | .....      | .....      | .....     | .....      |
| RO33                | .....      | .....      | .....      | .....      | .....      | .....      | .....     | .....      |
| Palo Alto           | .....      | .....      | .....      | .....      | .....      | .....      | .....     | .....      |
| FCR3                | .....      | .....      | .....      | .....      | .....      | .....      | .....     | .....      |
| Wellcome            | .....      | .....      | .....      | .....      | .....      | .....      | .....     | .....      |
| D6                  | .....      | .....      | .....      | .....      | .....      | .....      | .....     | .....      |
| T996                | .....      | .....      | .....      | .....      | .....      | .....      | .....     | .....      |
| T9102               | .....      | .....      | .....      | .....      | .....      | .....      | .....     | .....      |
| K1                  | .....      | .....      | .....      | .....      | .....      | .....      | .....     | .....      |
| Dd2                 | .....      | .....      | .....      | .....      | .....      | .....      | .....     | .....      |
| D10                 | .....      | .....      | .....      | .....      | .....      | .....      | .....     | .....      |
| FCC2                | .....      | .....      | .....      | .....      | .....      | .....      | .....     | .....      |
| HB3                 | .....      | .....      | .....      | .....      | .....      | .....      | .....     | .....      |
| 7G8                 | .....      | .....      | .....      | .....      | .....      | .....      | .....     | .....      |
| <i>P.reichenowi</i> | A.....     | .....      | .....GT    | .....      | .....      | .....      | .....     | .....      |

|                     | 1050       | 1060       | 1070       | 1080       | 1090      | 1100      | 1110       | 1120       |
|---------------------|------------|------------|------------|------------|-----------|-----------|------------|------------|
| PFL1385c            | AAAGATGAAC | TTGGGAGATA | AGAATAATCT | TGAAAGTTTT | CCTTAGATG | AATTAATAT | GTTAAAAGAT | AATTTAATAA |
| 3D7                 | .....      | .....      | .....      | .....      | .....     | .....     | .....      | .....      |
| RO33                | .....      | .....      | .....      | .....      | .....     | .....     | .....      | .....      |
| Palo Alto           | .....      | .....      | .....      | .....      | .....     | .....     | .....      | .....      |
| FCR3                | .....      | .....      | .....      | .....      | .....C    | .....     | .....      | .....      |
| Wellcome            | .....      | .....      | .....      | .....      | .....C    | .....     | .....      | .....      |
| D6                  | .....      | .....      | .....      | .....      | .....     | .....     | .....      | .....      |
| T996                | .....      | .....      | .....      | .....      | .....     | .....     | .....      | .....      |
| T9102               | .....      | .....      | .....      | .....      | .....C    | .....     | .....      | .....      |
| K1                  | .....      | .....      | .....      | .....      | .....C    | .....     | .....      | .....      |
| Dd2                 | .....      | .....      | .....      | .....      | .....C    | .....     | .....      | .....      |
| D10                 | .....      | .....      | .....      | .....      | .....C    | .....     | .....      | .....      |
| FCC2                | .....      | .....      | .....      | .....      | .....     | .....     | .....      | .....      |
| HB3                 | .....      | .....      | .....      | .....      | .....     | .....     | .....      | .....      |
| 7G8                 | .....      | .....      | .....      | .....      | .....     | .....     | .....      | .....      |
| <i>P.reichenowi</i> | .....      | .....      | T.....     | .....C     | .....C    | .....     | C.....     | .....T     |

|                     | 1130       | 1140       | 1150      | 1160       | 1170       | 1180      | 1190       | 1200       |
|---------------------|------------|------------|-----------|------------|------------|-----------|------------|------------|
| PFL1385c            | ACTATGAATT | CATATTAGAT | AATTTGAAA | CAAGTGTTTT | AAATAAATTA | AAAGATTAT | TATTAAGATT | ATTATACAAA |
| 3D7                 | .....      | .....      | .....     | .....      | .....      | .....     | .....      | .....      |
| RO33                | .....      | .....      | .....     | .....      | .....      | .....     | .....      | .....      |
| Palo Alto           | .....      | .....      | .....     | .....      | .....      | .....     | .....      | .....      |
| FCR3                | .....      | .....A     | .....     | .....      | .....      | .....     | .....      | .....      |
| Wellcome            | .....      | .....A     | .....     | .....      | .....      | .....     | .....      | .....      |
| D6                  | .....      | .....      | .....     | .....      | .....      | .....     | .....      | .....      |
| T996                | .....      | .....      | .....     | .....      | .....      | .....     | .....      | .....      |
| T9102               | .....      | .....A     | .....     | .....      | .....      | .....     | .....      | .....      |
| K1                  | .....      | .....A     | .....     | .....      | .....      | .....     | .....      | .....      |
| Dd2                 | .....      | .....A     | .....     | .....      | .....      | .....     | .....      | .....      |
| D10                 | .....      | .....A     | .....     | .....      | .....      | .....     | .....      | .....      |
| FCC2                | .....      | .....A     | .....     | .....      | .....      | .....     | .....      | .....      |
| HB3                 | .....      | .....      | .....     | .....      | .....      | .....     | .....      | .....      |
| 7G8                 | .....      | .....      | .....     | .....      | .....      | .....     | .....      | .....      |
| <i>P.reichenowi</i> | C.....     | .....A     | .....     | .....      | .....      | .....     | .....      | .....      |

|                     | 1210       | 1220       | 1230       | 1240       | 1250       | 1260       | 1270       | 1280       |
|---------------------|------------|------------|------------|------------|------------|------------|------------|------------|
| PFL1385c            | GCATATGTAT | CATATAAGAA | AAGAAAAGCT | CAAGAAAAAG | GATTACCAGA | ACCTACTGTT | ACTAATGAAG | AATATGTTGA |
| 3D7                 | .....      | .....      | .....      | .....      | .....      | .....      | .....      | .....      |
| RO33                | .....      | .....      | .....      | .....      | .....      | .....      | .....      | .....      |
| Palo Alto           | .....      | .....      | .....      | .....      | .....      | .....      | .....      | .....      |
| FCR3                | .....      | .....      | .....      | .....      | .....      | .....      | .....      | .....      |
| Wellcome            | .....      | .....      | .....      | .....      | .....      | .....      | .....      | .....      |
| D6                  | .....      | .....      | .....      | .....      | .....      | .....      | .....      | .....      |
| T996                | .....      | .....      | .....      | .....      | .....      | .....      | .....      | .....      |
| T9102               | .....      | .....      | .....      | .....      | .....      | .....      | .....      | .....      |
| K1                  | .....      | .....      | .....      | .....      | .....      | .....      | .....      | .....      |
| Dd2                 | .....      | .....      | .....      | .....      | .....      | .....      | .....      | .....      |
| D10                 | .....      | .....      | .....      | .....      | .....      | .....      | .....      | .....      |
| FCC2                | .....      | .....      | .....      | .....      | .....      | .....      | .....      | .....      |
| HB3                 | .....      | .....      | .....      | .....      | .....      | .....      | .....      | .....      |
| 7G8                 | .....      | .....      | .....      | .....      | .....      | .....      | .....      | .....      |
| <i>P.reichenowi</i> | .....      | .....      | .....G     | .....      | .....      | .....      | .....      | .....      |

|                     | 1290      | 1300       | 1310       | 1320       | 1330       | 1340       | 1350       | 1360       |
|---------------------|-----------|------------|------------|------------|------------|------------|------------|------------|
| PFL1385c            | AGAATTAAG | AAAGGTATTC | TAGATATGGG | TATCAAATTA | TTATTTAGTA | AAGTTAAAAG | CCTATTAATA | AAATTAATAA |
| 3D7                 | .....     | .....      | .....      | .....      | .....      | .....      | .....      | .....      |
| RO33                | .....     | .....      | .....      | .....      | .....      | .....      | .....      | .....      |
| Palo Alto           | .....     | .....      | .....      | .....      | .....      | .....      | .....      | .....      |
| FCR3                | .....     | .....      | .....      | .....      | .....      | .....      | .....      | .....      |
| Wellcome            | .....     | .....      | .....      | .....      | .....      | .....      | .....      | .....      |
| D6                  | .....     | .....      | .....      | .....      | .....      | .....      | .....      | .....      |
| T996                | .....     | .....      | .....      | .....      | .....      | .....      | .....      | .....      |
| T9102               | .....     | .....      | .....      | .....      | .....      | .....      | .....      | .....      |
| K1                  | .....     | .....      | .....      | .....      | .....      | .....      | .....      | .....      |
| Dd2                 | .....     | .....      | .....      | .....      | .....      | .....      | .....      | .....      |
| D10                 | .....     | .....      | .....      | .....      | .....      | .....      | .....      | .....      |
| FCC2                | .....     | .....      | .....      | .....      | .....      | .....      | .....      | .....      |
| HB3                 | .....     | .....      | .....      | .....      | .....      | .....      | .....      | .....      |
| 7G8                 | .....     | .....      | .....      | .....      | .....      | .....      | .....      | .....      |
| <i>P.reichenowi</i> | .....     | .....      | .....      | T.....     | .....      | .....      | T.....TC   | .....      |

|                     | 1370       | 1380       | 1390       | 1400       | 1410      | 1420       | 1430       | 1440       |
|---------------------|------------|------------|------------|------------|-----------|------------|------------|------------|
| PFL1385c            | ATAAAATATT | CCCTAAGAAA | AAAGAAGATA | ATCAAGCAGT | AGATACCAA | AGTATGGAAG | AACCCAAAGT | TAAAGCACAA |
| 3D7                 | .....      | .....      | .....      | .....      | .....     | .....      | .....      | .....      |
| RO33                | .....      | .....      | .....      | .....      | .....     | .....      | .....      | .....      |
| Palo Alto           | .....      | .....      | .....      | .....      | .....     | .....      | .....      | .....      |
| FCR3                | .....      | .....      | .....      | .....      | .....     | .....      | .....      | .....      |
| Wellcome            | .....      | .....      | .....      | .....      | .....     | .....      | .....      | .....      |
| D6                  | .....      | .....      | .....      | .....      | .....     | .....      | .....      | .....      |
| T996                | .....      | .....      | .....      | .....      | .....     | .....      | .....      | .....      |
| T9102               | .....      | .....      | .....      | .....      | .....     | .....      | .....      | .....      |
| K1                  | .....      | .....      | .....      | .....      | .....     | .....      | .....      | .....      |
| Dd2                 | .....      | .....      | .....      | .....      | .....     | .....      | .....      | .....      |
| D10                 | .....      | .....      | .....      | .....      | .....     | .....      | .....      | .....      |
| FCC2                | .....      | .....      | .....      | .....      | .....     | .....      | .....      | .....      |
| HB3                 | .....      | .....      | .....      | .....      | C.....    | .....      | .....      | .....      |
| 7G8                 | .....      | .....      | .....      | .....      | .....     | .....      | .....      | .....      |
| <i>P.reichenowi</i> | .....      | .....      | C.A.       | .....      | A.....    | A.CCA.G.   | A.T        | .....      |

|                     | 1450       | 1460       | 1470       | 1480       | 1490       | 1500       | 1510       | 1520       |
|---------------------|------------|------------|------------|------------|------------|------------|------------|------------|
| PFL1385c            | CCAGCTCTTA | GAGGTGTTGA | ACCAACGGAA | GATTCTAATA | TTATGAACAG | TATTAATAAT | GTTATGGATG | AAATTGATTT |
| 3D7                 | .....      | .....      | .....      | .....      | .....      | .....      | .....      | .....      |
| RO33                | .....      | .....      | .....      | .....      | .....      | .....      | .....      | .....      |
| Palo Alto           | .....      | .....      | .....      | .....      | .....      | .....      | .....      | .....      |
| FCR3                | .....      | .....      | .....      | .....      | .....      | .....      | .....      | .....      |
| Wellcome            | .....      | .....      | .....      | .....      | .....      | .....      | .....      | .....      |
| D6                  | .....      | .....      | .....      | .....      | .....      | .....      | .....      | .....      |
| T996                | .....      | .....      | .....      | .....      | .....      | .....      | .....      | .....      |
| T9102               | .....      | .....      | .....      | .....      | .....      | .....      | .....      | .....      |
| K1                  | .....      | .....      | .....      | .....      | .....      | .....      | .....      | .....      |
| Dd2                 | .....      | .....      | .....      | .....      | .....      | .....      | .....      | .....      |
| D10                 | .....      | .....      | .....      | .....      | .....      | .....      | .....      | .....      |
| FCC2                | .....      | .....      | .....      | .....      | .....      | .....      | .....      | .....      |
| HB3                 | .....      | .....      | .....      | .....      | .....      | .....      | .....      | .....      |
| 7G8                 | .....      | .....      | .....      | .....      | .....      | .....      | .....      | .....      |
| <i>P.reichenowi</i> | .....      | G.....     | T.....     | .....      | .....      | .....      | .....      | .....      |

|                     | 1530       | 1540       | 1550       | 1560       | 1570       | 1580       | 1590       | 1600       |
|---------------------|------------|------------|------------|------------|------------|------------|------------|------------|
| PFL1385c            | CTTTGAAAAA | GAATTAATCG | AAAATAATAA | TACACCTAAT | GTTGTACCAC | CAACTCAATC | AAAAAAAAAA | AACAAAAATG |
| 3D7                 | .....      | .....      | .....      | .....      | .....      | .....      | .....      | .....      |
| RO33                | .....      | .....      | .....      | .....      | .....      | .....      | .....      | .....      |
| Palo Alto           | .....      | .....      | .....      | .....      | .....      | .....      | .....      | .....      |
| FCR3                | .....      | .....      | .....      | .....      | .....      | .....      | .....      | .....      |
| Wellcome            | .....      | .....      | .....      | .....      | .....      | .....      | .....      | .....      |
| D6                  | .....      | .....      | .....      | .....      | .....      | .....      | .....      | .....      |
| T996                | .....      | .....      | .....      | .....      | .....      | .....      | .....      | .....      |
| T9102               | .....      | .....      | .....      | .....      | .....      | .....      | .....      | .....      |
| K1                  | .....      | .....      | .....      | .....      | .....      | .....      | .....      | .....      |
| Dd2                 | .....      | .....      | .....      | .....      | .....      | .....      | .....      | .....      |
| D10                 | .....      | .....      | .....      | .....      | .....      | .....      | .....      | .....      |
| FCC2                | .....      | .....      | .....      | .....      | .....      | .....      | .....      | .....      |
| HB3                 | .....      | .....      | .....      | .....      | .....      | .....      | .....      | .....      |
| 7G8                 | .....      | .....      | .....      | .....      | .....      | .....      | .....      | .....      |
| <i>P.reichenowi</i> | .....      | .....      | .....      | .....      | .....      | .....      | C ---      | .....      |

|                     | 1610       | 1620       | 1630       | 1640       | 1650       | 1660       | 1670        | 1680        |
|---------------------|------------|------------|------------|------------|------------|------------|-------------|-------------|
| PFL1385c            | AAACTGTATC | TGGTATGGAT | GAAAATTTTG | ATAATCATCC | TGAAAATTAT | TTTAAAGAAG | AATATTATTA  | TGATGAAAAAT |
| 3D7                 | .....      | .....      | .....      | .....      | .....      | .....      | .....       | .....       |
| RO33                | .....      | .....      | .....      | .....      | .....      | .....      | .....       | .....       |
| Palo Alto           | .....      | .....      | .....      | .....      | .....      | .....      | .....       | .....       |
| FCR3                | .....      | .....      | .....      | .....      | .....      | .....      | .....       | .....       |
| Wellcome            | .....      | .....      | .....      | .....      | .....      | .....      | .....       | .....       |
| D6                  | .....      | .....      | .....      | .....      | .....      | .....      | .....       | .....       |
| T996                | .....      | .....      | .....      | .....      | .....      | .....      | .....       | .....       |
| T9102               | .....      | .....      | .....      | .....      | .....      | .....      | .....       | .....       |
| K1                  | .....      | .....      | .....      | .....      | .....      | .....      | .....T..... | .....       |
| Dd2                 | .....      | .....      | .....      | .....      | .....      | .....      | .....       | .....       |
| D10                 | .....      | .....      | .....      | .....      | .....      | .....      | .....       | .....       |
| FCC2                | .....      | .....      | .....      | .....      | .....      | .....      | .....       | .....       |
| HB3                 | .....      | .....      | .....      | .....      | .....      | .....      | .....       | .....       |
| 7G8                 | .....      | .....      | .....      | .....      | .....      | .....      | .....       | .....       |
| <i>P.reichenowi</i> | T.....     | A.....AG.  | .....      | .....      | .....      | .....      | .....       | .....       |

|                     | 1690       | 1700        | 1710        | 1720      | 1730     | 1740      | 1750       | 1760        |
|---------------------|------------|-------------|-------------|-----------|----------|-----------|------------|-------------|
| PFL1385c            | GATGATATGG | AAGTAAAAGT  | TAAAAAATA   | GGTGTACAT | TAAAAAAT | TGAACCACT | AAAAATGGAA | ATGTTAGTGA  |
| 3D7                 | .....      | .....       | .....       | .....     | .....    | .....     | .....      | .....       |
| RO33                | .....      | .....       | .....       | .....     | .....    | .....     | .....      | .....       |
| Palo Alto           | .....      | .....       | .....       | .....     | .....    | .....     | .....      | .....       |
| FCR3                | .....      | .....       | .....       | .....     | .....    | .....     | .....      | .....       |
| Wellcome            | .....      | .....       | .....       | .....     | .....    | .....     | .....      | .....       |
| D6                  | .....      | .....       | .....       | .....     | .....    | .....     | .....      | .....       |
| T996                | .....      | .....       | .....       | .....     | .....    | .....     | .....      | .....       |
| T9102               | .....      | .....       | .....       | .....     | .....    | .....     | .....      | .....       |
| K1                  | .....      | .....       | .....       | .....     | .....    | .....     | .....      | .....       |
| Dd2                 | .....      | .....       | .....       | .....     | .....    | .....     | .....      | .....       |
| D10                 | .....      | .....       | .....       | .....     | .....    | .....     | .....      | .....       |
| FCC2                | .....      | .....       | .....       | .....     | .....    | .....     | .....      | .....       |
| HB3                 | .....      | .....       | .....       | .....     | .....    | .....     | .....      | .....       |
| 7G8                 | .....      | .....       | .....       | .....     | .....    | .....     | .....      | .....       |
| <i>P.reichenowi</i> | .....      | .....T..... | .....C..... | .....     | .....    | .....     | .....      | .....C..... |

|                     | 1770       | 1780         | 1790      | 1800      | 1810        | 1820       | 1830       | 1840        |
|---------------------|------------|--------------|-----------|-----------|-------------|------------|------------|-------------|
| PFL1385c            | AACCATTAAA | TTGATTCATT   | TAGGAAATA | AGATAAAAA | CACATTGAAG  | CTATAAACAA | CGATATTCAA | ATTATTAAAC  |
| 3D7                 | .....      | .....        | .....     | .....     | .....       | .....      | .....      | .....       |
| RO33                | .....      | .....        | .....     | .....     | .....       | .....      | .....      | .....       |
| Palo Alto           | .....      | .....        | .....     | .....     | .....       | .....      | .....      | .....       |
| FCR3                | .....      | .....        | .....     | .....     | .....       | .....      | .....      | .....       |
| Wellcome            | .....      | .....        | .....     | .....     | .....       | .....      | .....      | .....       |
| D6                  | .....      | .....        | .....     | .....     | .....       | .....      | .....      | .....       |
| T996                | .....      | .....        | .....     | .....     | .....       | .....      | .....      | .....       |
| T9102               | .....      | .....        | .....     | .....     | .....       | .....      | .....      | .....       |
| K1                  | .....      | .....        | .....     | .....     | .....       | .....      | .....      | .....       |
| Dd2                 | .....      | .....        | .....     | .....     | .....       | .....      | .....      | .....       |
| D10                 | .....      | .....        | .....     | .....     | .....       | .....      | .....      | .....       |
| FCC2                | .....      | .....        | .....     | .....     | .....       | .....      | .....      | .....       |
| HB3                 | .....      | .....        | .....     | .....     | .....       | .....      | .....      | .....       |
| 7G8                 | .....      | .....        | .....     | .....     | .....       | .....      | .....      | .....       |
| <i>P.reichenowi</i> | .....      | .....TG..... | .....     | .....     | .....A..... | .....      | .....      | .....G..... |

|                     | 1850       | 1860       | 1870       | 1880        | 1890       | 1900         | 1910       | 1920        |
|---------------------|------------|------------|------------|-------------|------------|--------------|------------|-------------|
| PFL1385c            | AAGAATTACA | AGCTATTTAT | AATGAACTTA | TGAATTATAC  | AAATGGAAAC | AAAAATATTC   | AACAAATATT | TCAACAAAAT  |
| 3D7                 | .....      | .....      | .....      | .....       | .....      | .....        | .....      | .....       |
| RO33                | .....      | .....      | .....      | .....       | .....      | .....        | .....      | .....       |
| Palo Alto           | .....      | .....      | .....      | .....       | .....      | .....        | .....      | .....       |
| FCR3                | .....      | .....      | .....      | .....       | .....      | .....        | .....      | .....       |
| Wellcome            | .....      | .....      | .....      | .....       | .....      | .....        | .....      | .....       |
| D6                  | .....      | .....      | .....      | .....       | .....      | .....        | .....      | .....       |
| T996                | .....      | .....      | .....      | .....       | .....      | .....        | .....      | .....       |
| T9102               | .....      | .....      | .....      | .....       | .....      | .....        | .....      | .....       |
| K1                  | .....      | .....      | .....      | .....       | .....      | .....        | .....      | .....       |
| Dd2                 | .....      | .....      | .....      | .....       | .....      | .....        | .....      | .....       |
| D10                 | .....      | .....      | .....      | .....       | .....      | .....        | .....      | .....       |
| FCC2                | .....      | .....      | .....      | .....       | .....      | .....        | .....      | .....       |
| HB3                 | .....      | .....      | .....      | .....       | .....      | .....        | .....      | .....       |
| 7G8                 | .....      | .....      | .....      | .....       | .....      | .....        | .....      | .....       |
| <i>P.reichenowi</i> | .....      | .....      | .....      | .....C..... | .....      | .....CG..... | .....      | .....C..... |





**PFB0340c -SERA5**

|              |             |             |             |             |             |             |             |             |
|--------------|-------------|-------------|-------------|-------------|-------------|-------------|-------------|-------------|
|              | 10          | 20          | 30          | 40          | 50          | 60          | 70          | 80          |
|              | ..... ..... | ..... ..... | ..... ..... | ..... ..... | ..... ..... | ..... ..... | ..... ..... | ..... ..... |
| PFB0340c     | ATGAAGTCAT  | ATATTTCCTT  | GTTTTTCATA  | TTGTGTGTTA  | TATTTAACAA  | AAATGTTATA  | AAATGTACAG  | GA-----     |
| 3D7          |             |             |             |             |             |             |             |             |
| RO33         |             |             |             | G.G....     | .....       | .....       | .....       | -----       |
| Palo Alto    |             |             |             |             |             |             |             |             |
| FCR3         |             |             |             |             |             |             |             |             |
| Wellcome     |             |             |             |             |             |             |             |             |
| D6           |             |             |             |             |             |             |             |             |
| T996         |             |             |             |             |             |             |             |             |
| T9102        |             |             |             | G.....      | .....       | .....       | .....       | -----       |
| K1           |             |             |             |             |             |             |             |             |
| Dd2          |             |             |             |             |             | ..A...      | C.G-----    | -----       |
| D10          |             |             |             |             |             |             |             |             |
| FCC2         |             |             |             | G.G....     | .....       | .....       | .....       | -----       |
| HB3          |             |             |             |             |             |             |             |             |
| 7G8          |             |             |             |             |             |             |             |             |
| P.reichenowi |             |             |             |             |             |             |             | ..GGAAGTAC  |

|              |             |             |             |             |             |             |             |                                                                                         |
|--------------|-------------|-------------|-------------|-------------|-------------|-------------|-------------|-----------------------------------------------------------------------------------------|
|              | 90          | 100         | 110         | 120         | 130         | 140         | 150         | 160                                                                                     |
|              | ..... ..... | ..... ..... | ..... ..... | ..... ..... | ..... ..... | ..... ..... | ..... ..... | ..... .....                                                                             |
| PFB0340c     |             |             |             |             |             |             |             |                                                                                         |
| 3D7          |             |             |             |             |             |             |             |                                                                                         |
| RO33         |             |             |             |             |             |             |             |                                                                                         |
| Palo Alto    |             |             |             |             |             |             |             |                                                                                         |
| FCR3         |             |             |             |             |             |             |             |                                                                                         |
| Wellcome     |             |             |             |             |             |             |             |                                                                                         |
| D6           |             |             |             |             |             |             |             |                                                                                         |
| T996         |             |             |             |             |             |             |             |                                                                                         |
| T9102        |             |             |             |             |             |             |             |                                                                                         |
| K1           |             |             |             |             |             |             |             |                                                                                         |
| Dd2          |             |             |             |             |             |             |             |                                                                                         |
| D10          |             |             |             |             |             |             |             |                                                                                         |
| FCC2         |             |             |             |             |             |             |             |                                                                                         |
| HB3          |             |             |             |             |             |             |             |                                                                                         |
| 7G8          |             |             |             |             |             |             |             |                                                                                         |
| P.reichenowi |             |             |             |             |             |             |             | ATCAACAAGT CCCGAACAAA GTAATCCTGG AAGTACAAGA GGAAGCACAC CATCAAGTTC AGTAGAAAGT AATTCTGTAA |

|              |             |             |             |             |             |             |             |                                                                                        |
|--------------|-------------|-------------|-------------|-------------|-------------|-------------|-------------|----------------------------------------------------------------------------------------|
|              | 170         | 180         | 190         | 200         | 210         | 220         | 230         | 240                                                                                    |
|              | ..... ..... | ..... ..... | ..... ..... | ..... ..... | ..... ..... | ..... ..... | ..... ..... | ..... .....                                                                            |
| PFB0340c     |             |             |             |             |             |             |             |                                                                                        |
| 3D7          |             |             |             |             |             |             |             |                                                                                        |
| RO33         |             |             |             |             |             |             |             |                                                                                        |
| Palo Alto    |             |             |             |             |             |             |             |                                                                                        |
| FCR3         |             |             |             |             |             |             |             |                                                                                        |
| Wellcome     |             |             |             |             |             |             |             |                                                                                        |
| D6           |             |             |             |             |             |             |             |                                                                                        |
| T996         |             |             |             |             |             |             |             |                                                                                        |
| T9102        |             |             |             |             |             |             |             |                                                                                        |
| K1           |             |             |             |             |             |             |             |                                                                                        |
| Dd2          |             |             |             |             |             |             |             |                                                                                        |
| D10          |             |             |             |             |             |             |             |                                                                                        |
| FCC2         |             |             |             |             |             |             |             |                                                                                        |
| HB3          |             |             |             |             |             |             |             |                                                                                        |
| 7G8          |             |             |             |             |             |             |             |                                                                                        |
| P.reichenowi |             |             |             |             |             |             |             | GTACAGGAGG AAGTACATCA TCAAGTCCG TACAAAGTAA TTCTGTAAGT ACAGGAGAAA ATTCACCATC AAGTTCGGTA |

|              |             |             |             |             |             |             |             |                                                                                         |
|--------------|-------------|-------------|-------------|-------------|-------------|-------------|-------------|-----------------------------------------------------------------------------------------|
|              | 250         | 260         | 270         | 280         | 290         | 300         | 310         | 320                                                                                     |
|              | ..... ..... | ..... ..... | ..... ..... | ..... ..... | ..... ..... | ..... ..... | ..... ..... | ..... .....                                                                             |
| PFB0340c     |             |             |             |             |             |             |             | GA                                                                                      |
| 3D7          |             |             |             |             |             |             |             |                                                                                         |
| RO33         |             |             |             |             |             |             |             | -----A.                                                                                 |
| Palo Alto    |             |             |             |             |             |             |             |                                                                                         |
| FCR3         |             |             |             |             |             |             |             |                                                                                         |
| Wellcome     |             |             |             |             |             |             |             |                                                                                         |
| D6           |             |             |             |             |             |             |             |                                                                                         |
| T996         |             |             |             |             |             |             |             |                                                                                         |
| T9102        |             |             |             |             |             |             |             | -----..                                                                                 |
| K1           |             |             |             |             |             |             |             |                                                                                         |
| Dd2          |             |             |             |             |             |             |             |                                                                                         |
| D10          |             |             |             |             |             |             |             |                                                                                         |
| FCC2         |             |             |             |             |             |             |             | -----A.                                                                                 |
| HB3          |             |             |             |             |             |             |             |                                                                                         |
| 7G8          |             |             |             |             |             |             |             |                                                                                         |
| P.reichenowi |             |             |             |             |             |             |             | GAAAGTAATT CTGGAAGTAC AGGAGAAAGT TCACCACCAA GTTCCGTAGA AAGTAATTCT GGAAGTACAG GACAAACT-- |



|                     | 650        | 660        | 670       | 680        | 690        | 700        | 710        | 720        |
|---------------------|------------|------------|-----------|------------|------------|------------|------------|------------|
| PFB0340c            | TTACTGGTCC | ATGTAACGAA | AATTCATAA | TGTTCTTAGT | TCCTCATATA | TATATTGATG | TTGATACAGA | AGATACTAAT |
| 3D7                 | .....      | .....      | .....     | .....      | .....      | .....      | .....      | .....      |
| RO33                | .....      | .....      | .....     | .....      | .....      | .....      | .....      | .....      |
| Palo Alto           | .....      | .....      | .....     | .....      | .....      | .....      | .....      | .....      |
| FCR3                | .....      | .....      | .....     | .....      | .....      | .....      | .....      | .....      |
| Wellcome            | .....      | .....      | .....     | .....      | .....      | .....      | .....      | .....      |
| D6                  | .....      | .....      | .....     | .....      | .....      | .....      | .....      | .....      |
| T996                | .....      | .....      | .....     | .....      | .....      | .....      | .....      | .....      |
| T9102               | .....      | .....      | .....     | .....      | .....      | .....      | .....      | .....      |
| K1                  | .....      | .....      | .....     | .....      | .....      | .....      | .....      | .....      |
| Dd2                 | .....      | .....      | .....     | .....      | .....      | .....      | .....      | .....      |
| D10                 | .....      | .....      | .....     | .....      | .....      | .....      | .....      | .....      |
| FCC2                | .....      | .....      | .....     | .....      | .....      | .....      | .....      | .....      |
| HB3                 | .....      | .....      | .....     | .....      | .....      | .....      | .....      | .....      |
| 7G8                 | .....      | .....      | .....     | .....      | .....      | .....      | .....      | .....      |
| <i>P.reichenowi</i> | .....      | .....      | .....     | .....      | .....      | .....      | .....      | T          |

|                     | 730        | 740        | 750       | 760        | 770        | 780        | 790        | 800        |
|---------------------|------------|------------|-----------|------------|------------|------------|------------|------------|
| PFB0340c            | ATCGAATTAA | GAACAACATT | GAAAAAACA | AATAATGCAA | TATCATTGTA | ATCAAACAGT | GGTTCATTAG | AAAAAATAAA |
| 3D7                 | .....      | .....      | .....     | .....      | .....      | .....      | .....      | .....      |
| RO33                | .....      | .....      | .....     | .....      | .....      | .....      | .....      | .....      |
| Palo Alto           | .....      | .....      | .....     | .....      | .....      | .....      | .....      | .....      |
| FCR3                | .....      | .....      | .G        | .....      | .....      | .....      | .....      | .....      |
| Wellcome            | .....      | .....      | .G        | .....      | .....      | .....      | .....      | .....      |
| D6                  | .....      | .....      | .....     | .....      | .....      | .....      | .....      | .....      |
| T996                | .....      | .....      | .....     | .....      | .....      | .....      | .....      | .....      |
| T9102               | .....      | .....      | .G        | .....      | .....      | .....      | .....      | .....      |
| K1                  | .....      | .....      | .....     | .....      | .....      | .....      | .....      | .....      |
| Dd2                 | .....      | .....      | .G        | .....      | .....      | .....      | .....      | .....      |
| D10                 | .....      | .....      | .G        | .....      | .....      | .....      | .....      | .....      |
| FCC2                | .....      | .....      | .G        | .....      | .....      | .....      | .....      | .....      |
| HB3                 | .....      | .....      | .G        | .....      | .....      | .....      | .....      | .....      |
| 7G8                 | .....      | .....      | .G        | .....      | .....      | .....      | .....      | .....      |
| <i>P.reichenowi</i> | .....      | .....      | .G        | .G         | T          | .....      | .G         | .....      |

|                     | 810        | 820        | 830        | 840        | 850         | 860        | 870        | 880        |
|---------------------|------------|------------|------------|------------|-------------|------------|------------|------------|
| PFB0340c            | ATATGTAAAA | CTACCATCAA | ATGGTACAAC | TGGTGAACAA | GGTTC AAGTA | CGGGAACAGT | TAGAGGAGAT | ACAGAACCAA |
| 3D7                 | .....      | .....      | .....      | .....      | .....       | .....      | .....      | .....      |
| RO33                | .....      | .....      | .....      | .A..C      | .....       | .....      | .....      | .....T     |
| Palo Alto           | .....      | .....      | .....      | .....      | .....       | .....      | .....      | .....T     |
| FCR3                | .....      | .....      | .....      | .....      | A...T       | -----      | -----      | -----      |
| Wellcome            | .....      | .....      | .....      | .....      | A...T       | -----      | -----      | -----      |
| D6                  | .....      | .....      | .....      | .....      | .....       | .....      | .....      | .....      |
| T996                | .....      | .....      | .....      | .....      | .....       | .....      | .....      | .....T     |
| T9102               | .....      | .....      | .....      | .....      | .....       | .....      | .....      | .....T     |
| K1                  | .....      | .....      | .....      | .....      | .....       | .....      | .....      | .....      |
| Dd2                 | .....      | .....      | .....      | .....      | .....       | .....      | .....      | .....T     |
| D10                 | .....      | .....      | .....      | .....      | A...T       | -----      | -----      | -----      |
| FCC2                | .....      | .....      | .....      | .....      | .....       | .....      | .....      | .....      |
| HB3                 | .....      | .....      | .....      | .....      | .....       | .....      | .....      | .....      |
| 7G8                 | .....      | .....      | .....      | .....      | .....       | .....      | .....      | .....      |
| <i>P.reichenowi</i> | .....      | .A         | .....      | .A         | AA..G.A     | .A..G      | .CA..A     | GA..T      |

|                     | 890        | 900        | 910        | 920        | 930        | 940        | 950        | 960        |
|---------------------|------------|------------|------------|------------|------------|------------|------------|------------|
| PFB0340c            | TTTCAGATTC | AAGCTCAAGT | TCAAGTTCAA | GCTCTAGTTC | AAGTTCAAGT | TCAAGTTCAA | GTTCTAGTTC | AAGTTCTAGT |
| 3D7                 | .....      | .....      | .....      | .....      | .....      | .....      | .....      | .....      |
| RO33                | .....      | .....      | .....T     | TT.A       | .....      | .....T     | .....A     | .....      |
| Palo Alto           | .....      | .....      | .....      | .....      | .....C     | .....T     | .....C.A.C | -----      |
| FCR3                | -----      | .....T     | .....T     | AT         | .....      | .....      | .....      | .....A     |
| Wellcome            | -----      | .....T     | .....T     | AT         | .....      | .....      | .....      | .....A     |
| D6                  | .....      | .....      | .....T     | T.A        | .....      | .....T     | .....A     | .....      |
| T996                | .....      | .....      | .....      | .....      | .....C     | .....      | .....C     | .....A     |
| T9102               | .....      | .....      | .....      | .....      | .....C     | .....      | .....C.A.C | -----      |
| K1                  | .....      | .....      | .....      | .....      | .....      | .....      | .....      | .....      |
| Dd2                 | .....      | .....      | .....      | .....      | .....C     | .....      | .....C.A.C | -----      |
| D10                 | -----      | .....T     | .....T     | T.A        | T          | .....      | .....      | .....A     |
| FCC2                | .....G     | .....      | .....T     | T.A        | .....      | .....T     | .....A     | .....A     |
| HB3                 | .....      | .....      | .....T     | T.A        | .....      | .....T     | .....A     | .....A     |
| 7G8                 | .....      | .....      | .....T     | T.A        | .....      | .....T     | .....A     | .....A     |
| <i>P.reichenowi</i> | G          | .....C     | .....      | T.AGAAC    | .....GA    | .....C.G   | .....A     | .....A.C   |

|                     | 970        | 980        | 990        | 1000       | 1010       | 1020      | 1030       | 1040       |
|---------------------|------------|------------|------------|------------|------------|-----------|------------|------------|
| PFB0340c            | .... ....  | .... ....  | .... ....  | .... ....  | .... ....  | .... .... | .... ....  | .... ....  |
| 3D7                 | TCAAGTTCA- | -----      | -----      | -----      | -----      | -----GAA  | AGTCTTCTG  | CTAATGGACC |
| RO33                | .....A     | GTTCAAGTTC | AAGTTCTAGT | TCAAGTTCA- | -----      | -----     | -----      | -----      |
| Palo Alto           | -----      | -----      | -----      | -----      | -----      | -----T.   | .A..CC.... | .....G.    |
| FCR3                | .....TA    | GTTCAAGTTC | TAGTTCAAGT | TCA-----   | -----      | -----     | -----      | -----      |
| Wellcome            | .....TA    | GTTCAAGTTC | TAGTTCAAGT | TCA-----   | -----      | -----     | -----      | -----      |
| D6                  | .....TA    | GTTCAAGTTC | A-----     | -----      | -----      | -----     | -----      | -----      |
| T996                | ..T.....A  | GTTCTAGTTC | AAGTTCA--  | -----      | -----      | -----     | -----      | -----      |
| T9102               | -----      | -----      | -----      | -----      | -----      | -----T.   | .A..CC.... | .....G.    |
| K1                  | -----      | -----      | -----      | -----      | -----      | -----     | -----      | -----      |
| Dd2                 | -----      | -----      | -----      | -----      | -----      | -----T.   | .A..CC.... | .....G.    |
| D10                 | .....A     | GTTCTAGTTC | AAGTTCTAGT | TCAAGTTCAA | GTTCTAGTTC | AAGTTCA.. | -----      | -----      |
| FCC2                | ..T.....A  | GTTCTAGTTC | AAGTTCA--  | -----      | -----      | -----     | -----      | -----      |
| HB3                 | .....TA    | GTTCAAGTTC | TAGTTCAAGT | TCA-----   | -----      | -----     | -----      | -----      |
| 7G8                 | ..T.....A  | GTTCTAGTTC | AAGTTCA--  | -----      | -----      | -----     | -----      | -----      |
| <i>P.reichenowi</i> | ..C.....A  | GTTCTAGTTC | TAGTTCAAGC | TCGAGTTCAG | GTTCA----- | -----T.   | .A.ACC.... | .....G.    |

|                     | 1050       | 1060       | 1070       | 1080       | 1090       | 1100       | 1110       | 1120       |
|---------------------|------------|------------|------------|------------|------------|------------|------------|------------|
| PFB0340c            | .... ....  | .... ....  | .... ....  | .... ....  | .... ....  | .... ....  | .... ....  | .... ....  |
| 3D7                 | TGATTCCCCT | ACTGTTAAAC | CGCCAAGAAA | TTTACAAAAT | ATATGTGAAA | CTGGAAAAAA | CTTCAAGTTG | GTAGTATATA |
| RO33                | .....      | .....      | .....      | .....      | .....      | .....      | .....      | .....      |
| Palo Alto           | ..G...TA.. | C...A.GC.A | A.AA..A..  | .....      | .....      | .....      | .....      | .....      |
| FCR3                | .....      | .....      | .....      | .....      | .....      | .....      | .....      | .....      |
| Wellcome            | .....      | .....      | .....      | .....      | .....      | .....      | .....      | .....      |
| D6                  | .....      | .....      | .....      | .....      | .....      | .....      | .....      | .....      |
| T996                | .....      | .....      | .....      | .....      | .....      | .....      | .....      | .....      |
| T9102               | ..G...TA.. | C...A.GC.A | A.AA..A..  | .....      | .....      | .....      | .....      | .....      |
| K1                  | .....      | C.....     | .....      | .....      | .....      | .....      | .....      | .....      |
| Dd2                 | ..G...TA.. | C...A.GC.A | A.AA..A..  | .....      | .....      | .....      | .....      | .....      |
| D10                 | .....      | .....      | .....      | .....      | .....      | .....      | .....      | .....      |
| FCC2                | .....      | .....      | .....      | .....      | .....      | .....      | .....      | .....      |
| HB3                 | .....      | .....      | .....      | .....      | .....      | .....      | .....      | .....      |
| 7G8                 | .....      | .....      | .....      | .....      | .....      | .....      | .....      | .....      |
| <i>P.reichenowi</i> | ..AG...AA. | C...A.GC.A | A.AA.....  | ...A.T..   | .....C.C   | .....C.G.  | ...A..T    | .....      |

|                     | 1130       | 1140       | 1150       | 1160       | 1170      | 1180       | 1190       | 1200       |
|---------------------|------------|------------|------------|------------|-----------|------------|------------|------------|
| PFB0340c            | .... ....  | .... ....  | .... ....  | .... ....  | .... .... | .... ....  | .... ....  | .... ....  |
| 3D7                 | TTAAGGAGAA | TACATTAATA | CTTAAATGGA | AAGTATACGG | AGAAACAAA | GATACTACTG | AAAATAACAA | AGTTGATGTA |
| RO33                | .....      | .....      | .....      | .....      | .....     | .....      | .....      | .....      |
| Palo Alto           | .....      | .....      | .....      | .....      | .....     | .....      | .....      | .....      |
| FCR3                | .....      | A.....     | .....      | .....      | .....     | .....      | .....      | .....      |
| Wellcome            | .....      | A.....     | .....      | .....      | .....     | .....      | .....      | .....      |
| D6                  | .....      | .....      | .....      | .....      | .....     | .....      | .....      | .....      |
| T996                | .....      | .....      | .....      | .....      | .....     | .....      | .....      | .....      |
| T9102               | .....      | A.....     | .....      | .....      | .....     | .....      | .....      | .....      |
| K1                  | .....      | .....      | .....      | .....      | .....     | .....      | .....      | .....      |
| Dd2                 | .....      | A.....     | .....      | .....      | .....     | .....      | .....      | .....      |
| D10                 | .....      | A.....     | .....      | .....      | .....     | .....      | .....      | .....      |
| FCC2                | .....      | A.....     | .....      | .....      | .....     | .....      | .....      | .....      |
| HB3                 | .....      | A.....     | .....      | .....      | .....     | .....      | .....      | .....      |
| 7G8                 | .....      | A.....     | .....      | .....      | .....     | .....      | .....      | .....      |
| <i>P.reichenowi</i> | .....      | .....      | .....      | ...T.A     | ..G.C...C | .....G.    | .....      | .....      |

|                     | 1210       | 1220       | 1230       | 1240       | 1250       | 1260       |
|---------------------|------------|------------|------------|------------|------------|------------|
| PFB0340c            | .... ....  | .... ....  | .... ....  | .... ....  | .... ....  | .... ....  |
| 3D7                 | AGAAAGTATT | TGATAAATGA | AAAGGAAACC | CCATTTACTA | ATATACTAAT | ACATGCGTAT |
| RO33                | .....      | .....      | .....      | .....      | .....      | .....      |
| Palo Alto           | .....      | .....      | .....      | .....      | .....      | .....      |
| FCR3                | .....      | .....      | .....      | G.....     | .....      | .....      |
| Wellcome            | .....      | .....      | .....      | G.....     | .....      | .....      |
| D6                  | .....      | .....      | .....      | .....      | .....      | .....      |
| T996                | .....      | .....      | .....      | .....      | .....      | .....      |
| T9102               | .....      | .....      | .....      | .....      | ..C.....   | .....      |
| K1                  | .....      | .....      | .....      | .....      | .....      | .....      |
| Dd2                 | .....      | .....      | .....      | .....      | .....      | .....      |
| D10                 | .....      | .....      | .....      | .....      | .....      | .....      |
| FCC2                | .....      | .....      | .....      | .....      | .....      | .....      |
| HB3                 | .....      | .....      | .....      | G.....     | .....      | .....      |
| 7G8                 | .....      | .....      | .....      | G.....     | .....      | .....      |
| <i>P.reichenowi</i> | .....      | .....      | .....      | G.....     | G.....     | .....      |
