# Supplementary material for: Prospective Identification of Malaria Parasite Genes under Balancing Selection
Source: PubMed Central journal article supplement (PMC2679211; doi:10.1371/journal.pone.0005568), 2009-05-15
Supplement: pone.0005568.s003.pdf [file pone.0005568.s003.pdf]

|                     |            |             |            |           |            |           |            |            |
|---------------------|------------|-------------|------------|-----------|------------|-----------|------------|------------|
|                     | 330        | 340         | 350        | 360       | 370        | 380       | 390        | 400        |
| MAL7P1.208          | AAAAGAGAAA | CATGAAAAG   | AAGATGAATA | TGAA----- | GATAATGATG | AAAGCTTTT | AGAAACTGAA | GAATATGAAG |
| 3D7                 | .....      | .....       | .....      | .....     | .....      | .....     | .....      | .....      |
| RO33                | .....      | .....       | .....      | .....     | .....      | .....     | .....      | .....      |
| Palo Alto           | .....      | .....       | .....      | .....     | .....      | .....     | .....      | .....      |
| FCR3                | .....      | .....       | .....      | .....     | .....      | .....     | .....      | .....      |
| Wellcome            | .....      | .....       | .....      | .....     | .....      | .....     | .....      | .....      |
| D6                  | .....      | .....       | .....      | .....     | .....      | .....     | .....      | .....      |
| T996                | .....      | .....       | .....      | .....     | .....      | .....     | .....      | .....      |
| T9102               | .....      | .....       | .....      | .....     | .....      | .....     | .....      | .....      |
| K1                  | .....      | .....       | .....      | .....     | .....      | .....     | .....      | .....      |
| Dd2                 | .....      | .....       | .....      | .....     | .....      | .....     | .....      | .....      |
| D10                 | .....      | .....       | .....      | .....     | .....      | .....     | .....      | .....      |
| FCC2                | .....      | .....       | .....      | .....     | .....      | .....     | .....      | .....      |
| HB3                 | .....      | .....       | .....      | .....     | .....      | .....     | .....      | .....      |
| 7G8                 | .....      | .....       | .....      | .....     | .....      | .....     | .....      | .....      |
| <i>P.reichenowi</i> | .....      | T G...G.... | .....      | TATGAA    | .....      | .....     | .....      | .....      |

|                     |            |            |            |            |            |            |            |            |
|---------------------|------------|------------|------------|------------|------------|------------|------------|------------|
|                     | 410        | 420        | 430        | 440        | 450        | 460        | 470        | 480        |
| MAL7P1.208          | ATAATGAAGA | TGAAAAATAT | AACAAAGATG | AAGATGATTA | TGCAGAAAGT | TTTATTGAGA | CTGATGAATA | TGAAGATAAT |
| 3D7                 | .....      | .....      | .....      | .....      | .....      | .....      | .....      | .....      |
| RO33                | .....      | .....      | .....      | .....      | .....      | .....      | .....      | .....      |
| Palo Alto           | .....      | .....      | .....      | .....      | .....      | .....      | .....      | .....      |
| FCR3                | .....      | .....      | .....      | .....      | .....      | .....      | .....      | .....      |
| Wellcome            | .....      | .....      | .....      | .....      | .....      | .....      | .....      | .....      |
| D6                  | .....      | .....      | .....      | .....      | .....      | .....      | .....      | .....      |
| T996                | .....      | .....      | .....      | .....      | .....      | .....      | .....      | .....      |
| T9102               | .....      | .....      | .....      | .....      | .....      | .....      | .....      | .....      |
| K1                  | .....      | .....      | .....      | .....      | .....      | .....      | .....      | .....      |
| Dd2                 | .....      | .....      | .....      | .....      | .....      | .....      | .....      | .....      |
| D10                 | .....      | .....      | .....      | .....      | .....      | .....      | .....      | .....      |
| FCC2                | .....      | .....      | .....      | .....      | .....      | .....      | .....      | .....      |
| HB3                 | .....      | .....      | .....      | .....      | .....      | .....      | .....      | .....      |
| 7G8                 | .....      | .....      | .....      | .....      | .....      | .....      | .....      | .....      |
| <i>P.reichenowi</i> | .....      | .....      | T..T....   | .....      | .....      | .....      | .....      | A.....     |

|                     |            |               |            |            |            |       |            |            |             |
|---------------------|------------|---------------|------------|------------|------------|-------|------------|------------|-------------|
|                     | 490        | 500           | 510        | 520        | 530        | 540   | 550        | 560        |             |
| MAL7P1.208          | GAAGATGAT- | -----         | -----      | -----      | -----      | AAATA | TAATAAAGAT | GAAGATGATT | ATTCAGAAAG  |
| 3D7                 | .....      | .....         | .....      | .....      | .....      | ..... | .....      | .....      | .....       |
| RO33                | .....      | .....         | .....      | .....      | .....      | ..... | .....      | .....      | .....       |
| Palo Alto           | .....      | .....         | .....      | .....      | .....      | ..... | .....      | .....      | .....       |
| FCR3                | .....      | .....         | .....      | .....      | .....      | ..... | .....      | .....      | .....       |
| Wellcome            | .....      | .....         | .....      | .....      | .....      | ..... | .....      | .....      | .....       |
| D6                  | .....      | .....         | .....      | .....      | .....      | ..... | .....      | .....      | .....       |
| T996                | .....      | .....         | .....      | .....      | .....      | ..... | .....      | .....      | .....       |
| T9102               | .....      | .....         | .....      | .....      | .....      | ..... | .....      | .....      | .....       |
| K1                  | .....      | .....         | .....      | .....      | .....      | ..... | .....      | .....      | .....       |
| Dd2                 | .....      | .....         | .....      | .....      | .....      | ..... | .....      | .....      | .....       |
| D10                 | .....      | .....         | .....      | .....      | .....      | ..... | .....      | .....      | .....       |
| FCC2                | .....      | .....         | .....      | .....      | .....      | ..... | .....      | .....      | .....       |
| HB3                 | .....      | .....         | .....      | .....      | .....      | ..... | .....      | .....      | .....       |
| 7G8                 | .....      | .....         | .....      | .....      | .....      | ..... | .....      | .....      | .....       |
| <i>P.reichenowi</i> | .....      | AA AATATAATAA | AGATGAAAAA | TATAATAAAG | ATGAA..... | ..... | .....      | .....      | .....G..... |

|                     |            |            |             |            |            |            |            |            |
|---------------------|------------|------------|-------------|------------|------------|------------|------------|------------|
|                     | 570        | 580        | 590         | 600        | 610        | 620        | 630        | 640        |
| MAL7P1.208          | CTTTATTGAG | ACTGATGAAT | ATGATGAT--  | -----      | -----      | -----      | -----      | -----      |
| 3D7                 | .....      | .....      | .....       | .....      | .....      | .....      | .....      | .....      |
| RO33                | .....      | .....      | .....       | .....      | .....      | .....      | .....      | .....      |
| Palo Alto           | .....      | .....      | .....       | .....      | .....      | .....      | .....      | .....      |
| FCR3                | .....      | .....      | .....       | .....      | .....      | .....      | .....      | .....      |
| Wellcome            | .....      | .....      | .....       | .....      | .....      | .....      | .....      | .....      |
| D6                  | .....      | .....      | .....       | .....      | .....      | .....      | .....      | .....      |
| T996                | .....      | .....      | .....       | .....      | .....      | .....      | .....      | .....      |
| T9102               | .....      | .....      | .....       | .....      | .....      | .....      | .....      | .....      |
| K1                  | .....      | .....      | .....       | .....      | .....      | .....      | .....      | .....      |
| Dd2                 | .....      | .....      | .....       | .....      | .....      | .....      | .....      | .....      |
| D10                 | .....      | .....      | .....       | .....      | .....      | .....      | .....      | .....      |
| FCC2                | .....      | .....      | .....       | .....      | .....      | .....      | .....      | .....      |
| HB3                 | .....      | .....      | .....       | .....      | .....      | .....      | .....      | .....      |
| 7G8                 | .....      | .....      | .....       | .....      | .....      | .....      | .....      | .....      |
| <i>P.reichenowi</i> | T.....     | .....      | .....A...AA | TAAAGATGAT | AAATATAATA | AAGATGAAAA | ATATAATAAA | GATGAAGATG |







|                     | 1610       | 1620                 | 1630       | 1640       | 1650       | 1660       | 1670       | 1680       |
|---------------------|------------|----------------------|------------|------------|------------|------------|------------|------------|
| MAL7P1.208          | ACGAAGATAA | AGATGTTGAA           | GATGAGTATG | AAGAAAGTTT | CTTACAAAAT | GATGAGAAAA | AAATGGTCTT | TTATGATTTA |
| 3D7                 | .....      | .....                | .....      | .....      | .....      | .....      | .....      | .....      |
| RO33                | .....      | .....                | .....      | .....      | .....      | .....      | .....      | .....      |
| Palo Alto           | .....      | .....                | .....      | .....      | .....      | .....      | .....      | .....      |
| FCR3                | .....      | .....                | .....      | .....      | .....      | .....      | .....      | .....      |
| Wellcome            | .....      | .....                | .....      | .....      | .....      | .....      | .....      | .....      |
| D6                  | .....      | .....                | .....      | .....      | .....      | .....      | .....      | .....      |
| T996                | .....      | .....                | .....      | .....      | .....      | .....      | .....      | .....      |
| T9102               | .....      | .....                | .....      | .....      | .....      | .....      | .....      | .....      |
| K1                  | .....      | .....                | .....      | .....      | .....      | .....      | .....      | .....      |
| Dd2                 | .....      | .....                | .....      | .....      | .....      | .....      | .....      | .....      |
| D10                 | .....      | .....                | .....      | .....      | .....      | .....      | .....      | .....      |
| FCC2                | .....      | .....                | .....      | .....      | .....      | .....      | .....      | .....      |
| HB3                 | .....      | .....                | .....      | .....      | .....      | .....      | .....      | .....      |
| 7G8                 | .....      | .....                | .....      | .....      | .....      | .....      | .....      | .....      |
| <i>P.reichenowi</i> | .....      | ..... <b>C</b> ..... | .....      | .....      | .....      | .....      | .....      | .....      |

|                     | 1690       | 1700                 | 1710       | 1720        | 1730                 | 1740      | 1750                 | 1760      |
|---------------------|------------|----------------------|------------|-------------|----------------------|-----------|----------------------|-----------|
| MAL7P1.208          | TACAAGCCAG | AAGAAAATGA           | ATCTTATTAT | GAAAAGA AAC | AAAAGAAGA            | AGAAAAGAA | GAGAAGAAG            | AGAAGAACA |
| 3D7                 | .....      | .....                | .....      | .....       | .....                | .....     | .....                | .....     |
| RO33                | .....      | .....                | .....      | .....       | .....                | .....     | .....                | .....     |
| Palo Alto           | .....      | .....                | .....      | .....       | .....                | .....     | .....                | .....     |
| FCR3                | .....      | .....                | .....      | .....       | .....                | .....     | .....                | .....     |
| Wellcome            | .....      | .....                | .....      | .....       | .....                | .....     | .....                | .....     |
| D6                  | .....      | .....                | .....      | .....       | .....                | .....     | .....                | .....     |
| T996                | .....      | .....                | .....      | .....       | .....                | .....     | .....                | .....     |
| T9102               | .....      | .....                | .....      | .....       | .....                | .....     | .....                | .....     |
| K1                  | .....      | .....                | .....      | .....       | .....                | .....     | .....                | .....     |
| Dd2                 | .....      | .....                | .....      | .....       | .....                | .....     | .....                | .....     |
| D10                 | .....      | .....                | .....      | .....       | .....                | .....     | .....                | .....     |
| FCC2                | .....      | .....                | .....      | .....       | .....                | .....     | .....                | .....     |
| HB3                 | .....      | .....                | .....      | .....       | .....                | .....     | .....                | .....     |
| 7G8                 | .....      | .....                | .....      | .....       | .....                | .....     | .....                | .....     |
| <i>P.reichenowi</i> | .....      | ..... <b>T</b> ..... | .....      | .....       | ..... <b>A</b> ..... | .....     | ..... <b>A</b> ..... | .....     |

|                     | 1770       | 1780                  | 1790       | 1800       | 1810       | 1820      | 1830       | 1840       |
|---------------------|------------|-----------------------|------------|------------|------------|-----------|------------|------------|
| MAL7P1.208          | AAGTTTGAAC | AAACAAACG             | ATATGGAAGA | CCAAGAAGAT | AATGAAGAAT | ATAAATTGA | AGAAGAAAAT | AAAGAAGACC |
| 3D7                 | .....      | .....                 | .....      | .....      | .....      | .....     | .....      | .....      |
| RO33                | .....      | .....                 | .....      | .....      | .....      | .....     | .....      | .....      |
| Palo Alto           | .....      | .....                 | .....      | .....      | .....      | .....     | .....      | .....      |
| FCR3                | .....      | .....                 | .....      | .....      | .....      | .....     | .....      | .....      |
| Wellcome            | .....      | .....                 | .....      | .....      | .....      | .....     | .....      | .....      |
| D6                  | .....      | .....                 | .....      | .....      | .....      | .....     | .....      | .....      |
| T996                | .....      | .....                 | .....      | .....      | .....      | .....     | .....      | .....      |
| T9102               | .....      | .....                 | .....      | .....      | .....      | .....     | .....      | .....      |
| K1                  | .....      | .....                 | .....      | .....      | .....      | .....     | .....      | .....      |
| Dd2                 | .....      | .....                 | .....      | .....      | .....      | .....     | .....      | .....      |
| D10                 | .....      | .....                 | .....      | .....      | .....      | .....     | .....      | .....      |
| FCC2                | .....      | .....                 | .....      | .....      | .....      | .....     | .....      | .....      |
| HB3                 | .....      | .....                 | .....      | .....      | .....      | .....     | .....      | .....      |
| 7G8                 | .....      | .....                 | .....      | .....      | .....      | .....     | .....      | .....      |
| <i>P.reichenowi</i> | .....      | ..... <b>TA</b> ..... | .....      | .....      | .....      | .....     | .....      | .....      |

|                     | 1850       | 1860       | 1870       | 1880       | 1890      | 1900                 | 1910       | 1920       |
|---------------------|------------|------------|------------|------------|-----------|----------------------|------------|------------|
| MAL7P1.208          | TTCTAGATGT | CCAACAAGAT | GAAGAATTAC | CAAGTGAAGG | AAAACAAAA | GTAAAAGGAA           | AATCATTGCA | TAATGAACAT |
| 3D7                 | .....      | .....      | .....      | .....      | .....     | .....                | .....      | .....      |
| RO33                | .....      | .....      | .....      | .....      | .....     | .....                | .....      | .....      |
| Palo Alto           | .....      | .....      | .....      | .....      | .....     | .....                | .....      | .....      |
| FCR3                | .....      | .....      | .....      | .....      | .....     | .....                | .....      | .....      |
| Wellcome            | .....      | .....      | .....      | .....      | .....     | .....                | .....      | .....      |
| D6                  | .....      | .....      | .....      | .....      | .....     | .....                | .....      | .....      |
| T996                | .....      | .....      | .....      | .....      | .....     | .....                | .....      | .....      |
| T9102               | .....      | .....      | .....      | .....      | .....     | .....                | .....      | .....      |
| K1                  | .....      | .....      | .....      | .....      | .....     | .....                | .....      | .....      |
| Dd2                 | .....      | .....      | .....      | .....      | .....     | .....                | .....      | .....      |
| D10                 | .....      | .....      | .....      | .....      | .....     | .....                | .....      | .....      |
| FCC2                | .....      | .....      | .....      | .....      | .....     | .....                | .....      | .....      |
| HB3                 | .....      | .....      | .....      | .....      | .....     | .....                | .....      | .....      |
| 7G8                 | .....      | .....      | .....      | .....      | .....     | .....                | .....      | .....      |
| <i>P.reichenowi</i> | .....      | .....      | .....      | .....      | .....     | ..... <b>G</b> ..... | .....      | .....      |



|                     | 2250       | 2260      | 2270      | 2280       | 2290       | 2300      | 2310      | 2320       |
|---------------------|------------|-----------|-----------|------------|------------|-----------|-----------|------------|
| MAL7P1.208          | AAACAAAATG | TATATGAAA | ACGAATATA | TAATAAGACA | AAAAATAATA | AAAACAATA | ATTGAACAA | CAAAATTATG |
| 3D7                 | .....      | .....     | .....     | .....      | .....      | .....     | .....     | .....      |
| RO33                | .....      | .....     | .....     | .....      | .....      | .....     | .....     | .....      |
| Palo Alto           | .....      | .....     | .....     | .....      | .....      | .....     | .....     | .....      |
| FCR3                | .....      | .....     | .....     | .....      | .....      | .....     | .....     | .....      |
| Wellcome            | .....      | .....     | .....     | .....      | .....      | .....     | .....     | .....      |
| D6                  | .....      | .....     | .....     | .....      | .G.....    | .....     | .....     | .....      |
| T996                | .....      | .....     | .....     | .....      | .....      | .....     | .....     | .....      |
| T9102               | .....      | .....     | .....     | .....      | .....      | .....     | .....     | .....      |
| K1                  | .....      | .....     | .....     | .....      | .....      | .....     | .....     | .....      |
| Dd2                 | .....      | .....     | .....     | .....      | .....      | .....     | .....     | .....      |
| D10                 | .....      | .....     | .....     | .....      | .....      | .....     | .....     | .....      |
| FCC2                | .....      | .....     | .....     | .....      | .....      | .....     | .....     | .....      |
| HB3                 | .....      | .....     | .....     | .....      | .....      | .....     | .....     | .....      |
| 7G8                 | .....      | .....     | .....     | .....      | .....      | .....     | .....     | .....      |
| <i>P.reichenowi</i> | .....      | .....     | .....     | .C.....    | .....      | .A.....   | .....     | .C.....    |

|                     | 2330       | 2340       | 2350       | 2360       | 2370       | 2380      | 2390       | 2400       |
|---------------------|------------|------------|------------|------------|------------|-----------|------------|------------|
| MAL7P1.208          | ATGAATCATA | TATGGATGAT | GATTATGAAC | AAAATGAAGA | ATTTAATGAT | AATAATCAA | GCGAAGATAT | GAAAGAAACA |
| 3D7                 | .....      | .....      | .....      | .....      | .....      | .....     | .....      | .....      |
| RO33                | .....      | .....      | .....      | .....      | .....      | .....     | .....      | .....      |
| Palo Alto           | .....      | .....      | .....      | .....      | .....      | .....     | .....      | .....      |
| FCR3                | .....      | .....      | .....      | .....      | .....      | .....     | .....      | .....      |
| Wellcome            | .....      | .....      | .....      | .....      | .....      | .....     | .....      | .....      |
| D6                  | .....      | .....      | .....      | .....      | .....      | .....     | .....      | .....      |
| T996                | .....      | .....      | .....      | .....      | .....      | .....     | .....      | .....      |
| T9102               | .....      | .....      | .....      | .....      | .....      | .....     | .....      | .....      |
| K1                  | .....      | .....      | .....      | .....      | .....      | .....     | .....      | .....      |
| Dd2                 | .....      | .....      | .....      | .....      | .....      | .....     | .....      | .....      |
| D10                 | .....      | .....      | .....      | .....      | .....      | .....     | .....      | .....      |
| FCC2                | .....      | .....      | .....      | .....      | .....      | .....     | .....      | .....      |
| HB3                 | .....      | .....      | .....      | .....      | .....      | .....     | .....      | .....      |
| 7G8                 | .....      | .....      | .....      | .....      | .....      | .....     | .....      | .....      |
| <i>P.reichenowi</i> | .....      | C..T.....  | .....      | T.....     | .....      | .....     | .....      | .....      |

|                     | 2410       | 2420       | 2430       | 2440       | 2450      | 2460       | 2470       | 2480       |
|---------------------|------------|------------|------------|------------|-----------|------------|------------|------------|
| MAL7P1.208          | AATGAACTCG | ATAAAATTAA | TGATGAACTA | TTAACTGATC | AAGGACCAA | CGAAGATACA | TTATTAGAAA | ATAATAATAA |
| 3D7                 | .....      | .....      | .....      | .....      | .....     | .....      | .....      | .....      |
| RO33                | .....      | .....      | .....      | .....      | .....     | .....      | .....      | .....      |
| Palo Alto           | .....      | .....      | .....      | .....      | .....     | .....      | .....      | .....      |
| FCR3                | .....      | .....      | .....      | .....      | .....     | .....      | .....      | .....      |
| Wellcome            | .....      | .....      | .....      | .....      | .....     | .....      | .....      | .....      |
| D6                  | .....      | .....      | .....      | .....      | .....     | .....      | .....      | .....      |
| T996                | .....      | .....      | .....      | .....      | .....     | .....      | .....      | .....      |
| T9102               | .....      | .....      | .....      | .....      | .....     | .....      | .....      | .....      |
| K1                  | .....      | .....      | .....      | .....      | .....     | .....      | .....      | .....      |
| Dd2                 | .....      | .....      | .....      | .....      | .....     | .....      | .....      | .....      |
| D10                 | .....      | .....      | .....      | .....      | .....     | .....      | .....      | .....      |
| FCC2                | .....      | .....      | .....      | .....      | .....     | .....      | .....      | .....      |
| HB3                 | .....      | .....      | .....      | .....      | .....     | .....      | .....      | .....      |
| 7G8                 | .....      | .G.....    | .A.....    | .....      | .....     | .....      | .....      | .....      |
| <i>P.reichenowi</i> | .....      | .G.....    | .....      | .C.....    | .....     | .....      | .....      | .....      |

|                     | 2490       | 2500      | 2510      | 2520      | 2530       | 2540       | 2550      | 2560       |
|---------------------|------------|-----------|-----------|-----------|------------|------------|-----------|------------|
| MAL7P1.208          | AATTTTCGAT | AATAAATTG | TAGCACATA | AAAAGAGAA | AAAAGTATAT | CCCCACACAG | TTACCAAAG | GTATCTACCA |
| 3D7                 | .....      | .....     | .....     | .....     | .....      | .....      | .....     | .....      |
| RO33                | .....      | .....     | .....     | .....     | .....      | .....      | .....     | .....      |
| Palo Alto           | .....      | .....     | .....     | .....     | .....      | .....      | .....     | .....      |
| FCR3                | .....      | .....     | .....     | .....     | .....      | .....      | .....     | .....      |
| Wellcome            | .....      | .....     | .....     | .....     | .....      | .....      | .....     | .....      |
| D6                  | .....      | .....     | .....     | .....     | .....      | .....      | .....     | .....      |
| T996                | .....      | .....     | .....     | .....     | .....      | .....      | .....     | .....      |
| T9102               | .....      | .....     | .....     | .....     | .....      | .....      | .....     | .....      |
| K1                  | .....      | .....     | .....     | .....     | .....      | .....      | .....     | .....      |
| Dd2                 | .....      | .....     | .....     | .....     | .....      | .....      | .....     | .....      |
| D10                 | .....      | .....     | .....     | .....     | .....      | .....      | .....     | .....      |
| FCC2                | .....      | .....     | .....     | .....     | .....      | .....      | .....     | .....      |
| HB3                 | .....      | .....     | .....     | .....     | .....      | .....      | .....     | .....      |
| 7G8                 | .....      | .....     | .....     | .....     | .....      | .....      | .....     | .....      |
| <i>P.reichenowi</i> | .....      | .....     | .C.....   | .....     | .C.....    | .....      | .A.....   | .T.....    |





PF13\_0348\_Rhop148

|                     |            |            |            |            |            |           |            |            |
|---------------------|------------|------------|------------|------------|------------|-----------|------------|------------|
|                     | 10         | 20         | 30         | 40         | 50         | 60        | 70         | 80         |
| PF13_0348           | ATGTATGATA | TATCTAGTGA | ACAAATTAAT | ATACAAAATA | AGTTTTTAAA | AAATTAGAT | TTATATTGTA | TATTAATAAT |
| 3D7                 | .....      | .....      | .....      | .....      | .....      | .....     | .....      | .....      |
| RO33                | .....      | .....      | .....      | .....      | .....      | .....     | .....      | .....      |
| Palo Alto           | .....      | .....      | .....      | .....      | .....      | .....     | .....      | .....      |
| FCR3                | .....      | .....      | .....      | .....      | .....      | .....     | .....      | .....      |
| Wellcome            | .....      | .....      | .....      | .....      | .....      | .....     | .....      | .....      |
| D6                  | .....      | .....      | .....      | .....      | .....      | .....     | .....      | .....      |
| T996                | .....      | .....      | .....      | .....      | .....      | .....     | .....      | .....      |
| T9102               | .....      | .....      | .....      | .....      | .....      | .....     | .....      | .....      |
| K1                  | .....      | .....      | .....      | .....      | .....      | .....     | .....      | .....      |
| Dd2                 | .....      | .....      | .....      | .....      | .....      | .....     | .....      | .....      |
| D10                 | .....      | .....      | .....      | .....      | .....      | .....     | .....      | .....      |
| FCC2                | .....      | .....      | .....      | .....      | .....      | .....     | .....      | .....      |
| HB3                 | .....      | .....      | .....      | .....      | .....      | .....     | .....      | .....      |
| 7G8                 | .....      | .....      | .....      | .....      | .....      | .....     | .....      | .....      |
| <i>P.reichenowi</i> | .....      | .....      | .....      | .....      | .....      | .....     | .....      | .....      |

|                     |            |            |            |            |            |            |             |             |
|---------------------|------------|------------|------------|------------|------------|------------|-------------|-------------|
|                     | 90         | 100        | 110        | 120        | 130        | 140        | 150         | 160         |
| PF13_0348           | TATTATAACA | AACAATATAG | AAATATACAA | TGAAGAGAGT | TACAATGTTT | TAATAAATCT | AGTAAAAATCA | AATAAAAAATA |
| 3D7                 | .....      | .....      | .....      | .....      | .....      | .....      | .....       | .....       |
| RO33                | .....      | .....      | .....      | .....      | .....      | .....      | .....       | .....       |
| Palo Alto           | .....      | .....      | .....      | .....      | .....      | .....      | .....       | .....       |
| FCR3                | .....      | .....      | .....      | .....      | .....      | .....      | .....       | .....       |
| Wellcome            | .....      | .....      | .....      | .....      | .....      | .....      | .....       | .....       |
| D6                  | .....      | .....      | .....      | .....      | .....      | .....      | .....       | .....       |
| T996                | .....      | .....      | .....      | .....      | .....      | .....      | .....       | .....       |
| T9102               | .....      | .....      | .....      | .....      | .....      | .....      | .....       | .....       |
| K1                  | .....      | .....      | .....      | .....      | .....      | .....      | .....       | .....       |
| Dd2                 | .....      | .....      | .....      | .....      | .....      | .....      | .....       | .....       |
| D10                 | .....      | .....      | .....      | .....      | .....      | .....      | .....       | .....       |
| FCC2                | .....      | .....      | .....      | .....      | .....      | .....      | .....       | .....       |
| HB3                 | .....      | .....      | .....      | .....      | .....      | .....      | .....       | .....       |
| 7G8                 | .....      | .....      | .....      | .....      | .....      | .....      | .....       | .....       |
| <i>P.reichenowi</i> | .....      | .....      | .....      | .....      | .....      | .....      | .....       | .....       |

|                     |            |            |            |            |            |            |            |            |
|---------------------|------------|------------|------------|------------|------------|------------|------------|------------|
|                     | 170        | 180        | 190        | 200        | 210        | 220        | 230        | 240        |
| PF13_0348           | TAACTGTAGA | GGAATCTAAA | AGGATCTTTT | CAAATAACAA | GAAATTATTC | AAAAGGTATA | TGTATAAGAA | AAATAAAAGA |
| 3D7                 | .....      | .....      | .....      | .....      | .....      | .....      | .....      | .....      |
| RO33                | .....      | .....      | .....      | .....      | .....      | .....      | .....      | .....      |
| Palo Alto           | .....      | .....      | .....      | .....      | .....      | .....      | .....      | .....      |
| FCR3                | .....      | .....      | .....      | .....      | .....      | .....      | .....      | .....      |
| Wellcome            | .....      | .....      | .....      | .....      | .....      | .....      | .....      | .....      |
| D6                  | .....      | .....      | .....      | .....      | .....      | .....      | .....      | .....      |
| T996                | .....      | .....      | .....      | .....      | .....      | .....      | .....      | .....      |
| T9102               | .....      | .....      | .....      | .....      | .....      | .....      | .....      | .....      |
| K1                  | .....      | .....      | .....      | .....      | .....      | .....      | .....      | .....      |
| Dd2                 | .....      | .....      | .....      | .....      | .....      | .....      | .....      | .....      |
| D10                 | .....      | .....      | .....      | .....      | .....      | .....      | .....      | .....      |
| FCC2                | .....      | .....      | .....      | .....      | .....      | .....      | .....      | .....      |
| HB3                 | .....      | .....      | .....      | .....      | .....      | .....      | .....      | .....      |
| 7G8                 | .....      | .....      | .....      | .....      | .....      | .....      | .....      | .....      |
| <i>P.reichenowi</i> | .....      | .....      | .....      | .....      | .....      | .....      | .....      | .....C     |

|                     |            |            |            |            |            |            |            |            |
|---------------------|------------|------------|------------|------------|------------|------------|------------|------------|
|                     | 250        | 260        | 270        | 280        | 290        | 300        | 310        | 320        |
| PF13_0348           | AGGCCATGTC | AAATAAACAA | CACTCATAAT | ATTGATGAT- | -----      | -----      | -----      | -----      |
| 3D7                 | .....      | .....      | .....      | .....      | -----      | -----      | -----      | -----      |
| RO33                | .....      | .....      | .....      | .....      | -----      | -----      | GATAATAATA | ATAATAATAT |
| Palo Alto           | .....      | .....G     | .....      | .....      | -----      | -----      | GATAATAATA | ATAATAATAT |
| FCR3                | .....      | .....      | .....      | .....      | -----      | -----      | GATAATAATA | ATAATAATAT |
| Wellcome            | .....      | .....      | .....      | .....      | -----      | -----      | GATAATAATA | ATAATAATAT |
| D6                  | .....      | .....      | .....      | .....      | -----      | -----      | GATAATAATA | ATAATAATAT |
| T996                | .....      | .....      | .....      | .....A     | ATAATAATAA | TAATATTGAT | GATAATAATA | ATAATAATAT |
| T9102               | .....      | .....      | .....      | .....      | -----      | -----      | GATAATAATA | ATAATAATAT |
| K1                  | .....      | .....      | .....      | .....      | -----      | -----      | GATAATAATA | ATAATAATAT |
| Dd2                 | .....      | .....      | .....      | .....      | -----      | -----      | GATAATAATA | ATAATAATAT |
| D10                 | .....      | .....      | .....      | .....      | -----      | -----      | GATAATAATA | ATAATAATAT |
| FCC2                | .....      | .....      | .....      | .....      | -----      | -----      | GATAATAATA | ATAATAATAT |
| HB3                 | .....      | .....      | .....      | .....      | -----      | -----      | GATAATAATA | ATAATAATAT |
| 7G8                 | .....      | .....      | .....      | .....      | -----      | -----      | GATAATAATA | ATAATAATAT |
| <i>P.reichenowi</i> | .....      | .....T     | .....A.A   | .....      | -----      | -----GAT   | GATAATAATA | ATAATAATAT |

|                     | 330        | 340        | 350        | 360        | 370        | 380        | 390        | 400        |
|---------------------|------------|------------|------------|------------|------------|------------|------------|------------|
| PF13_0348           | .... ....  | .... ....  | .... ....  | .... ....  | .... ....  | .... ....  | .... ....  | .... ....  |
| 3D7                 | ----GATAAT | AATAATAATA | ATAAT----  | -----      | -----      | ---ATCTTAA | GAATTATAGT | CCTAGTGAGA |
| RO33                | TGAT.....  | .....      | .....AAT-- | -----      | -----      | -----      | -----      | -----      |
| Palo Alto           | TGAT.....  | .....      | .....ATTGA | TGATAATAAT | AATAATAATA | AT.....    | -----      | -----      |
| FCR3                | TGAT.....  | .....      | -----      | -----      | -----      | -----      | -----      | -----      |
| Wellcome            | TGAT.....  | .....      | -----      | -----      | -----      | -----      | -----      | -----      |
| D6                  | TGAT.....  | .....      | -----      | -----      | -----      | -----      | -----      | -----      |
| T996                | TGAT.....  | .....      | -----      | -----      | -----      | -----      | -----      | -----      |
| T9102               | TGAT.....  | .....      | -----      | -----      | -----      | -----      | -----      | -----      |
| K1                  | TGAT.....  | .....      | -----      | -----      | -----      | -----      | -----      | -----      |
| Dd2                 | TGAT.....  | .....      | -----      | -----      | -----      | -----      | -----      | -----      |
| D10                 | TGAT.....  | .....      | -----      | -----      | -----      | -----      | -----      | -----      |
| FCC2                | TGAT.....  | .....      | -----      | -----      | -----      | -----      | -----      | -----      |
| HB3                 | TGAT.....  | .....      | -----      | -----      | -----      | -----      | -----      | -----      |
| 7G8                 | TGAT.....  | .....      | -----      | -----      | -----      | -----      | -----      | -----      |
| <i>P.reichenowi</i> | -----      | -----      | -----      | -----      | -----      | -----      | -----      | -----      |

|                     | 410        | 420        | 430           | 440        | 450        | 460        | 470        | 480        |
|---------------------|------------|------------|---------------|------------|------------|------------|------------|------------|
| PF13_0348           | .... ....  | .... ....  | .... ....     | .... ....  | .... ....  | .... ....  | .... ....  | .... ....  |
| 3D7                 | TACACACCGA | TTGTGCGAAT | ATCTGTAACG    | ATGATAAAAA | AATGGATGTT | AATCAAAATT | TATATAACAA | AGAAATATAC |
| RO33                | .....      | .....      | .....         | .....      | .....      | .....      | .....      | .....      |
| Palo Alto           | .....      | .....      | .....         | .....      | .....      | .....      | .....      | .....      |
| FCR3                | .....      | .....      | .....         | .....      | .....      | .....      | .....      | .....      |
| Wellcome            | .....      | .....      | .....         | .....      | .....      | .....      | .....      | .....      |
| D6                  | .....      | .....      | .....         | .....      | .....      | .....      | .....      | .....      |
| T996                | .....      | .....      | .....         | .....      | .....      | .....      | .....      | .....      |
| T9102               | .....      | .....      | .....         | .....      | .....      | .....      | .....      | .....      |
| K1                  | .....      | .....      | .....         | .....      | .....      | .....      | .....      | .....      |
| Dd2                 | .....      | .....      | .....         | .....      | .....      | .....      | .....      | .....      |
| D10                 | .....      | .....      | .....         | .....      | .....      | .....      | .....      | .....      |
| FCC2                | .....      | .....      | .....         | .....      | .....      | .....      | .....      | .....      |
| HB3                 | .....      | .....      | .....         | .....      | .....      | .....      | .....      | .....      |
| 7G8                 | .....      | .....      | .....         | .....      | .....      | .....      | .....      | .....      |
| <i>P.reichenowi</i> | .....      | .....      | .....T.C..... | .....      | .....      | .....      | .....      | .....      |

|                     | 490        | 500        | 510         | 520        | 530        | 540        | 550         | 560        |
|---------------------|------------|------------|-------------|------------|------------|------------|-------------|------------|
| PF13_0348           | .... ....  | .... ....  | .... ....   | .... ....  | .... ....  | .... ....  | .... ....   | .... ....  |
| 3D7                 | ACAAATGATT | CCCTTTTTTC | TAAAGATCTA  | AACAATAAAA | TATTATTGTA | GTTTTTTCAA | TTCCCGAAA   | GTAATTACGT |
| RO33                | .....      | .....      | .....       | .....      | .....      | .....      | .....       | .....      |
| Palo Alto           | .....      | .....      | .....       | .....      | .....      | .....      | .....       | .....      |
| FCR3                | .....      | .....      | .....       | .....      | .....      | .....      | .....       | .....      |
| Wellcome            | .....      | .....      | .....       | .....      | .....      | .....      | .....       | .....      |
| D6                  | .....      | .....      | .....       | .....      | .....      | .....      | .....       | .....      |
| T996                | .....      | .....      | .....       | .....      | .....      | .....      | .....       | .....      |
| T9102               | .....      | .....      | .....       | .....      | .....      | .....      | .....       | .....      |
| K1                  | .....      | .....      | .....       | .....      | .....      | .....      | .....       | .....      |
| Dd2                 | .....      | .....      | .....       | .....      | .....      | .....      | .....       | .....      |
| D10                 | .....      | .....      | .....       | .....      | .....      | .....      | .....       | .....      |
| FCC2                | .....      | .....      | .....       | .....      | .....      | .....      | .....       | .....      |
| HB3                 | .....      | .....      | .....       | .....      | .....      | .....      | .....       | .....      |
| 7G8                 | .....      | .....      | .....       | .....      | .....      | .....      | .....       | .....      |
| <i>P.reichenowi</i> | .....      | .....      | .....G..... | .....      | .....      | .....      | .....T..... | .....      |

|                     | 570         | 580        | 590        | 600        | 610         | 620        | 630        | 640        |
|---------------------|-------------|------------|------------|------------|-------------|------------|------------|------------|
| PF13_0348           | .... ....   | .... ....  | .... ....  | .... ....  | .... ....   | .... ....  | .... ....  | .... ....  |
| 3D7                 | GTCAGAAATAT | ATTAATAAAT | TATGTAAGGA | AAAGTTGATA | CATGAACCGT  | TAAATATAAA | TTTGAGTCTT | GTTAAATTGG |
| RO33                | .....       | .....      | .....      | .....      | .....       | .....      | .....      | .....      |
| Palo Alto           | .....       | .....      | .....      | .....      | .....       | .....      | .....      | .....      |
| FCR3                | .....       | .....      | .....      | .....      | .....       | .....      | .....      | .....      |
| Wellcome            | .....       | .....      | .....      | .....      | .....       | .....      | .....      | .....      |
| D6                  | .....       | .....      | .....      | .....      | .....       | .....      | .....      | .....      |
| T996                | .....       | .....      | .....      | .....      | .....       | .....      | .....      | .....      |
| T9102               | .....       | .....      | .....      | .....      | .....       | .....      | .....      | .....      |
| K1                  | .....       | .....      | .....      | .....      | .....       | .....      | .....      | .....      |
| Dd2                 | .....       | .....      | .....      | .....      | .....       | .....      | .....      | .....      |
| D10                 | .....       | .....      | .....      | .....      | .....       | .....      | .....      | .....      |
| FCC2                | .....       | .....      | .....      | .....      | .....       | .....      | .....      | .....      |
| HB3                 | .....       | .....      | .....      | .....      | .....       | .....      | .....      | .....      |
| 7G8                 | .....       | .....      | .....      | .....      | .....       | .....      | .....      | .....      |
| <i>P.reichenowi</i> | .....       | .....      | .....      | .....      | .....A..... | .....      | .....      | .....      |

|                     |            |            |           |            |            |            |           |            |
|---------------------|------------|------------|-----------|------------|------------|------------|-----------|------------|
|                     | 650        | 660        | 670       | 680        | 690        | 700        | 710       | 720        |
| PF13_0348           | ATAAGAAGAA | AAAGAAAAGC | AAAAAAGAA | AAACATGTAA | AAGGAATAAT | ATTGGAGAGA | TGCAACAAG | TACAAATAAA |
| 3D7                 | .....      | .....      | .....     | .....      | .....      | .....      | .....     | .....      |
| RO33                | .....      | .....      | .....     | .....      | .....      | .....      | .....     | .....      |
| Palo Alto           | .....      | .....      | .....     | .....      | .....      | .....      | .....     | .....      |
| FCR3                | .....      | .....      | .....     | .....      | .....      | .....      | .....     | .....      |
| Wellcome            | .....      | .....      | .....     | .....      | .....      | .....      | .....     | .....      |
| D6                  | .....      | .....      | .....     | .....      | .....      | .....      | .....     | .....      |
| T996                | .....      | .....      | .....     | .....      | .....      | .....      | .....     | .....      |
| T9102               | .....      | .....      | .....     | .....      | .....      | .....      | .....     | .....      |
| K1                  | .....      | .....      | .....     | .....      | .....      | .....      | .....     | .....      |
| Dd2                 | .....      | .....      | .....     | .....      | .....      | .....      | .....     | .....      |
| D10                 | .....      | .....      | .....     | .....      | .....      | .....      | .....     | .....      |
| FCC2                | .....      | .....      | .....     | .....      | .....      | .....      | .....     | .....      |
| HB3                 | .....      | .....      | .....     | .....      | .....      | .....      | .....     | .....      |
| 7G8                 | .....      | .....      | .....     | .....      | .....      | .....      | .....     | .....      |
| <i>P.reichenowi</i> | .....      | .....      | .....     | .....      | .....      | .....T     | .....G    | .....C     |

|                     |            |            |            |            |            |           |            |           |
|---------------------|------------|------------|------------|------------|------------|-----------|------------|-----------|
|                     | 730        | 740        | 750        | 760        | 770        | 780       | 790        | 800       |
| PF13_0348           | TATAACAGTG | ATTCAGGTAT | AGGGGTCACG | GCAAAAACAA | ATACGGACAT | AAATAAAAC | ATTAATAGGA | ATGTAATAG |
| 3D7                 | .....      | .....      | .....      | .....      | .....      | .....     | .....      | .....     |
| RO33                | .....      | .....      | .....      | .....      | .....      | .....     | .....      | .....     |
| Palo Alto           | .....      | .....      | .....      | .....      | .....      | .....     | .....      | .....     |
| FCR3                | .....      | .....      | .....      | .....      | .....      | .....     | .....      | .....     |
| Wellcome            | .....      | .....      | .....      | .....      | .....      | .....     | .....      | .....     |
| D6                  | .....      | .....      | .....      | .....      | .....      | .....     | .....      | .....     |
| T996                | .....      | .....      | .....      | .....      | .....      | .....     | .....      | .....     |
| T9102               | .....      | .....      | .....      | .....      | .....      | .....     | .....      | .....     |
| K1                  | .....      | .....      | .....      | .....      | .....      | .....     | .....      | .....     |
| Dd2                 | .....      | .....      | .....      | .....      | .....      | .....     | .....      | .....     |
| D10                 | .....      | .....      | .....      | .....      | .....      | .....     | .....      | .....     |
| FCC2                | .....      | .....      | .....      | .....      | .....      | .....     | .....      | .....     |
| HB3                 | .....      | .....      | .....      | .....      | .....      | .....     | .....      | .....     |
| 7G8                 | .....      | .....      | .....      | .....      | .....      | .....     | .....      | .....     |
| <i>P.reichenowi</i> | .....      | .....G     | .....C     | .....      | .....A     | .....     | .....T     | .....     |

|                     |            |            |            |            |            |            |            |                     |
|---------------------|------------|------------|------------|------------|------------|------------|------------|---------------------|
|                     | 810        | 820        | 830        | 840        | 850        | 860        | 870        | 880                 |
| PF13_0348           | AAATATAACC | ATGATGGGAA | ACGCAAACAC | AAACACGAAT | GCAAACACAA | ACACAAATGC | AAACGTCAAC | ACCAACGTCA          |
| 3D7                 | .....      | .....      | .....      | .....      | .....      | .....      | .....      | .....               |
| RO33                | .....      | .....      | .....      | .....      | .....      | .....      | .....      | .....               |
| Palo Alto           | .....      | .....      | .....      | .....      | .....      | .....      | .....      | .....               |
| FCR3                | .....      | .....      | .....      | .....      | .....      | .....      | .....      | .....               |
| Wellcome            | .....      | .....      | .....      | .....      | .....      | .....      | .....      | .....               |
| D6                  | .....      | .....      | .....      | .....      | .....      | .....      | .....      | .....               |
| T996                | .....      | .....      | .....      | .....      | .....      | .....      | .....      | .....               |
| T9102               | .....      | .....      | .....      | .....      | .....      | .....      | .....      | .....               |
| K1                  | .....      | .....      | .....      | .....      | .....      | .....      | .....      | .....               |
| Dd2                 | .....      | .....      | .....      | .....      | .....      | .....      | .....      | .....               |
| D10                 | .....      | .....      | .....      | .....      | .....      | .....      | .....      | .....               |
| FCC2                | .....      | .....      | .....      | .....      | .....      | .....      | .....      | .....               |
| HB3                 | .....      | .....      | .....      | .....      | .....      | .....      | .....      | .....               |
| 7G8                 | .....      | .....      | .....      | .....      | .....      | .....      | .....      | .....               |
| <i>P.reichenowi</i> | .....      | .....A.A   | .....T     | .....A.T   | .....C A   | .....A.TG  | .....AAT G | .....ACA.T G.A.TACA |

|                     |            |            |            |            |            |            |            |            |
|---------------------|------------|------------|------------|------------|------------|------------|------------|------------|
|                     | 890        | 900        | 910        | 920        | 930        | 940        | 950        | 960        |
| PF13_0348           | ACACCAACGT | CAACACC    | -----      | -----      | -----      | -----      | -----      | -----AAC   |
| 3D7                 | .....      | .....      | .....      | .....      | .....      | .....      | .....      | .....      |
| RO33                | .....AC    | .....A---  | -----A     | ATGCAAACGT | CAACACCAAC | GTCAACACCA | ACACCAACAC | AAATGCA... |
| Palo Alto           | .....AAC   | ACCAACACAA | ATGCAAACGT | CAACACCAAC | GTCAACACC- | -----      | -----      | -----      |
| FCR3                | .....AC    | .....A---  | -----A     | ATGCAAACGT | CAACACCAAC | GTCAACACCA | ACACCAACAC | AAATGCA... |
| Wellcome            | .....AC    | .....A---  | -----A     | ATGCAAACGT | CAACACCAAC | GTCAACACCA | ACACCAACAC | AAATGCA... |
| D6                  | -----      | .....A---  | -----A     | ATGCAAACGT | CAACACCAAC | GTCAACACCA | ACACCAACAC | AAATGCA... |
| T996                | .....AC    | .....A---  | -----A     | ATGCAAACGT | CAACACCAAC | GTCAACACCA | ACACCAACAC | AAATGCA... |
| T9102               | .....AC    | .....AAC   | ACA-----   | ATGCAAACGT | CAACACCAAC | GTCAACACCA | ACACCAACAC | AAATGCA... |
| K1                  | .....AC    | .....A---  | -----A     | ATGCAAACGT | CAACACCAAC | GTCAACACCA | ACACCAACAC | AAATGCA... |
| Dd2                 | .....AC    | .....AAC   | ACA-----   | ATGCAAACGT | CAACACCAAC | GTCAACACCA | ACACCAACAC | AAATGCA... |
| D10                 | .....AC    | .....A---  | -----A     | ATGCAAACGT | CAACACCAAC | GTCAACACCA | ACACCAACAC | AAATGCA... |
| FCC2                | .....AC    | .....A---  | -----A     | ATGCAAACGT | CAACACCAAC | GTCAACACCA | ACACCAACAC | AAATGCA... |
| HB3                 | .....AC    | .....A---  | -----A     | ATGCAAACGT | CAACACCAAC | GTCAACACCA | ACACCAACAC | AAATGCA--- |
| 7G8                 | .....AC    | .....A---  | -----A     | ATGCAAACGT | CAACACCAAC | GTCAACACCA | ACACCAACAC | AAATGCA--- |
| <i>P.reichenowi</i> | TT.A...AC  | ...T.AAAT  | ACAATTACAA | ACACCAATAC | AAATACAATC | ACAAACACCA | ATACAAATAC | CGAGACA..T |



|                     | 1290        | 1300       | 1310        | 1320        | 1330       | 1340        | 1350       | 1360        |
|---------------------|-------------|------------|-------------|-------------|------------|-------------|------------|-------------|
| PF13_0348           | CGTTTCAAAC  | GATAATATAA | ATGTTTCATAT | AAATTACAAT  | ATAAATAATA | AAATGAATAA  | CAATATATTT | AAAAATGAAA  |
| 3D7                 | .....       | .....      | .....       | .....       | .....      | .....       | .....      | .....       |
| RO33                | .....       | .....      | .....       | .....       | .....      | .....       | .....      | .....       |
| Palo Alto           | .....       | .....      | .....       | .....       | .....      | .....       | .....      | .....       |
| FCR3                | .....       | .....      | .....       | .....       | .....      | .....       | .....      | .....       |
| Wellcome            | .....       | .....      | .....       | .....       | .....      | .....       | .....      | .....       |
| D6                  | .....       | .....      | .....       | .....       | .....      | .....       | .....      | .....       |
| T996                | .....       | .....      | .....       | .....       | .....      | .....       | .....      | .....       |
| T9102               | .....       | .....      | .....       | .....       | .....      | .....       | .....      | .....       |
| K1                  | .....       | .....      | .....       | .....       | .....      | .....       | .....      | .....       |
| Dd2                 | .....       | .....      | .....       | .....       | .....      | .....       | .....      | .....       |
| D10                 | .....       | .....      | .....       | .....       | .....      | .....       | .....      | .....       |
| FCC2                | .....       | .....      | .....       | .....       | .....      | .....       | .....      | .....       |
| HB3                 | .....       | .....      | .....       | .....       | .....      | .....       | .....      | .....       |
| 7G8                 | .....       | .....      | .....       | .....       | .....      | .....       | .....      | .....       |
| <i>P.reichenowi</i> | .....G..... | .....      | .....       | .....T..... | .....      | .....A..... | .....      | .....T..... |

|                     | 1370        | 1380       | 1390         | 1400       | 1410        | 1420       | 1430           | 1440          |
|---------------------|-------------|------------|--------------|------------|-------------|------------|----------------|---------------|
| PF13_0348           | ATAAATACTCT | TGTCGAAAGT | TTTAAAACAG   | ATTTATTGTA | TTCAATAGAA  | AAAAATAAAA | ATGACATATA     | TGCGCATAAT    |
| 3D7                 | .....       | .....      | .....        | .....      | .....       | .....      | .....          | .....         |
| RO33                | .....       | .....      | .....        | .....      | .....       | .....      | .....          | .....         |
| Palo Alto           | .....       | .....      | .....        | .....      | .....       | .....      | .....          | .....         |
| FCR3                | .....       | .....      | .....        | .....      | .....       | .....      | .....          | .....         |
| Wellcome            | .....       | .....      | .....        | .....      | .....       | .....      | .....          | .....         |
| D6                  | .....       | .....      | .....        | .....      | .....       | .....      | .....          | .....         |
| T996                | .....       | .....      | .....        | .....      | .....       | .....      | .....          | .....         |
| T9102               | .....       | .....      | .....        | .....      | .....       | .....      | .....          | .....         |
| K1                  | .....       | .....      | .....        | .....      | .....       | .....      | .....          | .....         |
| Dd2                 | .....       | .....      | .....        | .....      | .....       | .....      | .....          | .....         |
| D10                 | .....       | .....      | .....        | .....      | .....       | .....      | .....          | .....         |
| FCC2                | .....       | .....      | .....        | .....      | .....       | .....      | .....          | .....         |
| HB3                 | .....       | .....      | .....        | .....      | .....       | .....      | .....          | .....         |
| 7G8                 | .....       | .....      | .....        | .....      | .....       | .....      | .....          | .....         |
| <i>P.reichenowi</i> | .....G..... | .....      | .....GC..... | .....      | .....G..... | .....      | .....G..T..... | .....A.A..... |

|                     | 1450        | 1460        | 1470       | 1480        | 1490       | 1500              | 1510       | 1520        |
|---------------------|-------------|-------------|------------|-------------|------------|-------------------|------------|-------------|
| PF13_0348           | TGTAGTAATT  | CAGATGAGGA  | TTCGATATAT | AATTATTTTA  | GTGATAATAC | AAATATTGAT        | GATCATAATA | AAATGAATAA  |
| 3D7                 | .....       | .....       | .....      | .....       | .....      | .....             | .....      | .....       |
| RO33                | .....       | .....       | .....      | .....       | .....      | .....             | .....      | .....       |
| Palo Alto           | .....       | .....       | .....      | .....       | .....      | .....             | .....      | .....       |
| FCR3                | .....       | .....       | .....      | .....       | .....      | .....             | .....      | .....       |
| Wellcome            | .....       | .....       | .....      | .....       | .....      | .....             | .....      | .....       |
| D6                  | .....       | .....       | .....      | .....       | .....      | .....             | .....      | .....       |
| T996                | .....       | .....       | .....      | .....       | .....      | .....             | .....      | .....       |
| T9102               | .....       | .....       | .....      | .....       | .....      | .....             | .....      | .....       |
| K1                  | .....       | .....       | .....      | .....       | .....      | .....             | .....      | .....       |
| Dd2                 | .....       | .....       | .....      | .....       | .....      | .....             | .....      | .....       |
| D10                 | .....       | .....       | .....      | .....       | .....      | .....             | .....      | .....       |
| FCC2                | .....       | .....       | .....      | .....       | .....      | .....             | .....      | .....       |
| HB3                 | .....       | .....       | .....      | .....       | .....      | .....             | .....      | .....       |
| 7G8                 | .....       | .....       | .....      | .....       | .....      | .....             | .....      | .....       |
| <i>P.reichenowi</i> | .....C..... | .....A..... | .....      | .....C..... | .....      | .....C..C..T..... | .....      | .....A..... |

|                     | 1530       | 1540       | 1550              | 1560       | 1570         | 1580       | 1590        | 1600        |
|---------------------|------------|------------|-------------------|------------|--------------|------------|-------------|-------------|
| PF13_0348           | TGTAATTAGG | GAACGCGTTA | ATAATATAGG        | TAAGAATTAT | TATAGCACAG   | AAAAGTATAA | TAATAACAAT  | AATGATAATA  |
| 3D7                 | .....      | .....      | .....             | .....      | .....        | .....      | .....       | .....       |
| RO33                | .....      | .....      | .....             | .....      | .....        | .....      | .....       | .....       |
| Palo Alto           | .....      | .....      | .....             | .....      | .....        | .....      | .....       | .....       |
| FCR3                | .....      | .....      | .....             | .....      | .....        | .....      | .....       | .....       |
| Wellcome            | .....      | .....      | .....             | .....      | .....        | .....      | .....       | .....       |
| D6                  | .....      | .....      | .....             | .....      | .....        | .....      | .....       | .....       |
| T996                | .....      | .....      | .....             | .....      | .....        | .....      | .....       | .....       |
| T9102               | .....      | .....      | .....             | .....      | .....        | .....      | .....       | .....       |
| K1                  | .....      | .....      | .....             | .....      | .....        | .....      | .....       | .....       |
| Dd2                 | .....      | .....      | .....             | .....      | .....        | .....      | .....       | .....       |
| D10                 | .....      | .....      | .....             | .....      | .....        | .....      | .....       | .....       |
| FCC2                | .....      | .....      | .....             | .....      | .....        | .....      | .....       | .....       |
| HB3                 | .....      | .....      | .....             | .....      | .....        | .....      | .....       | .....       |
| 7G8                 | .....      | .....      | .....             | .....      | .....        | .....      | .....       | .....       |
| <i>P.reichenowi</i> | .....      | .....      | .....C.....A..... | .....      | .....AT..... | .....      | .....T..... | .....A..... |

|                     | 1610       | 1620            | 1630       | 1640       | 1650        | 1660       | 1670      | 1680       |
|---------------------|------------|-----------------|------------|------------|-------------|------------|-----------|------------|
| PF13_0348           | ATAACAATAA | TGATAATAAT      | AACAATAATG | ATAATAATAA | CAATAATGAT  | AATAATAACA | AC-----   | -----      |
| 3D7                 | .....      | .....           | .....      | .....      | .....       | .....      | -----     | -----      |
| RO33                | .....      | .....           | .....      | .....      | .....       | .....      | -----     | -----      |
| Palo Alto           | .....      | .....           | .....      | .....      | .....       | .....      | -----     | -----      |
| FCR3                | .....      | .....           | .....      | .....      | .....       | .....      | -----     | -----      |
| Wellcome            | .....      | .....           | .....      | .....      | .....       | .....      | -----     | -----      |
| D6                  | .....      | .....           | .....      | .....      | .....       | .....      | -----     | -----      |
| T996                | .....      | .....           | .....      | .....      | .....       | .....      | -----     | -----      |
| T9102               | .....      | .....           | .....      | .....      | .....C----- | -----      | -----     | -----      |
| K1                  | .....      | .....           | .....      | .....      | .....C----- | -----      | -----     | -----      |
| Dd2                 | .....      | .....           | .....      | .....      | .....C----- | -----      | -----     | -----      |
| D10                 | .....      | .....           | .....      | .....      | .....       | .....      | -----     | -----      |
| FCC2                | .....      | .....           | .....      | .....      | .....C----- | -----      | -----     | -----      |
| HB3                 | .....      | .....           | .....      | .....      | .....       | .....      | TAATGATAA | TAATAACAAC |
| 7G8                 | .....      | .....           | .....      | .....      | .....       | .....      | .....     | .....      |
| <i>P.reichenowi</i> | .....T.C.  | .....CA.C.....C | .....C.A.C | .....      | -----       | -----      | -----     | -----      |

|                     | 1690       | 1700       | 1710      | 1720        | 1730       | 1740       | 1750       | 1760       |
|---------------------|------------|------------|-----------|-------------|------------|------------|------------|------------|
| PF13_0348           | ATCAATAATA | ATAATAATAA | GAAAAAG-- | AACAAGAACA  | ACAACAATAA | TAATAATAAT | TATAATAAT- | -----AT    |
| 3D7                 | .....      | .....      | .....     | .....       | .....      | .....      | -----      | -----      |
| RO33                | .....      | .....      | .....     | .....C..... | .....      | .....      | -----      | -----      |
| Palo Alto           | .....      | .....      | .....     | .....C..... | .....      | .....      | -----      | -----      |
| FCR3                | .....      | .....      | .....     | .....C..... | .....      | .....      | -----      | -----      |
| Wellcome            | .....      | .....      | .....     | .....C..... | .....      | .....      | -----      | -----      |
| D6                  | .....      | .....      | .....     | .....C..... | .....      | .....      | -----      | -----      |
| T996                | .....      | .....      | .....AAG  | .....C..... | .....      | .....      | -----      | -----      |
| T9102               | .....      | .....      | .....     | .....C..... | .....      | .....      | -----      | -----      |
| K1                  | .....      | .....      | .....     | .....C..... | .....      | .....      | -----      | -----      |
| Dd2                 | .....      | .....      | .....     | .....C..... | .....      | .....      | -----      | -----      |
| D10                 | .....      | .....      | .....     | .....C..... | .....      | .....      | -----      | -----      |
| FCC2                | .....      | .....      | .....     | .....C..... | .....      | .....      | -----      | -----      |
| HB3                 | .....      | .....      | .....     | .....C..... | .....      | .....      | -----      | -----      |
| 7G8                 | .....      | .....      | .....     | .....       | .....      | .....      | -----      | -----      |
| <i>P.reichenowi</i> | -----      | -----      | -----     | -----       | -----      | -----      | .....T     | ACAATAAT.. |

|                     | 1770       | 1780      | 1790       | 1800       | 1810       | 1820       | 1830       | 1840       |
|---------------------|------------|-----------|------------|------------|------------|------------|------------|------------|
| PF13_0348           | TTGTATAGT  | AGTAGTATA | ATAAAATGAA | CGATTATAAA | CATATGATT- | -----      | -----      | -----      |
| 3D7                 | .....      | .....     | .....      | .....      | .....      | -----      | -----      | -----      |
| RO33                | .....      | .....     | .....      | .....      | .....      | -----      | -----      | -----      |
| Palo Alto           | .....      | .....     | .....      | .....      | .....      | -----      | -----      | -----      |
| FCR3                | .....      | .....     | .....      | .....      | .....      | -----      | -----      | -----      |
| Wellcome            | .....      | .....     | .....      | .....      | .....      | -----      | -----      | -----      |
| D6                  | .....      | .....     | .....      | .....      | .....      | -----      | -----      | -----      |
| T996                | .....      | .....     | .....      | .....      | .....      | -----      | -----      | -----      |
| T9102               | .....      | .....     | .....      | .....      | .....      | -----      | -----      | -----      |
| K1                  | .....      | .....     | .....      | .....      | .....      | -----      | -----      | -----      |
| Dd2                 | .....      | .....     | .....      | .....      | .....      | -----      | -----      | -----      |
| D10                 | .....      | .....     | .....      | .....      | .....      | -----      | -----      | -----      |
| FCC2                | .....      | .....     | .....      | .....      | .....      | -----      | -----      | -----      |
| HB3                 | .....      | .....     | .....      | .....      | .....      | -----      | -----      | -----      |
| 7G8                 | .....      | .....     | .....      | .....      | .....      | -----      | -----      | -----      |
| <i>P.reichenowi</i> | .....A.--- | .....     | .....      | .....      | -----A     | ATCATAATGA | TAATTATAAT | ACAGGTAATA |

|                     | 1850       | 1860       | 1870        | 1880       | 1890        | 1900        | 1910      | 1920       |
|---------------------|------------|------------|-------------|------------|-------------|-------------|-----------|------------|
| PF13_0348           | -----      | -----      | -----TTTA   | ATAATAATGA | TAATACCATA  | TTCAAGCATA  | AAACTCATT | ATCTTCTTTA |
| 3D7                 | -----      | -----      | -----       | .....      | .....       | .....       | .....     | .....      |
| RO33                | -----      | -----      | -----       | .....      | .....       | .....       | .....     | .....      |
| Palo Alto           | -----      | -----      | -----       | .....      | .....       | .....       | .....     | .....      |
| FCR3                | -----      | -----      | -----       | .....      | .....       | .....       | .....     | .....      |
| Wellcome            | -----      | -----      | -----       | .....      | .....       | .....       | .....     | .....      |
| D6                  | -----      | -----      | -----       | .....      | .....       | .....       | .....     | .....      |
| T996                | -----      | -----      | -----       | .....      | .....       | .....       | .....     | .....      |
| T9102               | -----      | -----      | -----       | .....      | .....       | .....       | .....     | .....      |
| K1                  | -----      | -----      | -----       | .....      | .....       | .....       | .....     | .....      |
| Dd2                 | -----      | -----      | -----       | .....      | .....       | .....       | .....     | .....      |
| D10                 | -----      | -----      | -----       | .....      | .....       | .....       | .....     | .....      |
| FCC2                | -----      | -----      | -----       | .....      | .....       | .....       | .....     | .....      |
| HB3                 | -----      | -----      | -----       | .....      | .....       | .....       | .....     | .....      |
| 7G8                 | -----      | -----      | -----       | .....      | .....       | .....       | .....     | .....      |
| <i>P.reichenowi</i> | CTTATGATAA | TACAAAACAT | ATCGTT..... | .....      | .....G..... | .....A..... | .....     | .....      |





|                     | 2250       | 2260       | 2270      | 2280       | 2290       | 2300       | 2310       | 2320       |
|---------------------|------------|------------|-----------|------------|------------|------------|------------|------------|
| PF13_0348           | TTTATATATA | CTCAAAAATA | TTTCTTAAA | AGATTTATAT | AAACAACAAA | AGATTTATCA | AAATGATCAT | CATAATAACA |
| 3D7                 | .....      | .....      | .....     | .....      | .....      | .....      | .....      | .....      |
| RO33                | .....      | .....      | .....     | .....      | .....      | .C.....    | .....      | .....      |
| Palo Alto           | .....      | .....      | .....     | .....      | .....      | .C.....    | .....      | .....      |
| FCR3                | .....      | .....      | .....     | .....      | .....      | .....      | .....      | .....      |
| Wellcome            | .....      | .....      | .....     | .....      | .....      | .....      | .....      | .....      |
| D6                  | .....      | .....      | .....     | .....      | .....      | .C.....    | .....      | .....      |
| T996                | .....      | .....      | .....     | .....      | .....      | .C.....    | .....      | .....      |
| T9102               | .....      | .....      | .....     | .....      | .....      | .....      | .....      | .....      |
| K1                  | .....      | .....      | .....     | .....      | .....      | .....      | .....      | .....      |
| Dd2                 | .....      | .....      | .....     | .....      | .....      | .....      | .....      | .....      |
| D10                 | .....      | .....      | .....     | .....      | .....      | .....      | .....      | .....      |
| FCC2                | .....      | .....      | .....     | .....      | .....      | .....      | .....      | .....      |
| HB3                 | .....      | .....      | .....     | .....      | .....      | .C.....    | .....      | .....      |
| 7G8                 | .....      | .....      | .....     | .....      | .....      | .....      | .....      | .....      |
| <i>P.reichenowi</i> | A.....     | .G.....    | .....     | .C.....    | .....      | .....      | .....      | .....      |

|                     | 2330       | 2340       | 2350       | 2360       | 2370       | 2380       | 2390       | 2400       |
|---------------------|------------|------------|------------|------------|------------|------------|------------|------------|
| PF13_0348           | AAAAAAAAAT | TTATAGAAAA | AGAAATGCTT | TAAGGAAAAA | AAAAAAAAAA | GAAAAAGAAA | ATATTTTAGA | AATATTAGAT |
| 3D7                 | .....      | .....      | .....      | .....      | .....      | .....      | .....      | .....      |
| RO33                | .....      | .....      | .....      | .....      | .....      | .....      | .....      | .....      |
| Palo Alto           | .....      | .....      | .....      | .....      | .....      | .....      | .....      | .....      |
| FCR3                | .....      | .....      | .....      | .....      | .....      | .....      | .....      | .....      |
| Wellcome            | .....      | .....      | .....      | .....      | .....      | .....      | .....      | .....      |
| D6                  | .....      | .....      | .....      | .....      | .....      | .....      | .....      | .....      |
| T996                | .....      | .....      | .....      | .....      | .....      | .....      | .....      | .....      |
| T9102               | .....      | .....      | .....      | .....      | .....      | .....      | .....      | .....      |
| K1                  | .....      | .....      | .....      | .....      | .....      | .....      | .....      | .....      |
| Dd2                 | .....      | .....      | .....      | .....      | .....      | .....      | .....      | .....      |
| D10                 | .....      | .....      | .....      | .....      | .....      | .....      | .....      | .....      |
| FCC2                | .....      | .....      | .....      | .....      | .....      | .....      | .....      | .....      |
| HB3                 | .....      | .....      | G.....     | .....      | .....      | .....      | .....      | .....      |
| 7G8                 | .....      | .....      | .....      | .....      | .....      | .....      | .....      | .....      |
| <i>P.reichenowi</i> | .....G     | .....      | .....      | .....      | .G.....    | .....      | .C.....    | .G.....    |

|                     | 2410        | 2420       | 2430       | 2440       | 2450       | 2460        | 2470       | 2480       |
|---------------------|-------------|------------|------------|------------|------------|-------------|------------|------------|
| PF13_0348           | GAAGAGAAAA  | GAATTAATGT | TCTATATTTT | ATTAATCGTT | TTCTATATTC | AAATAAAACC  | CCTTTATCAT | ATTTATTTAG |
| 3D7                 | .....       | .....      | .....      | .....      | .....      | .....       | .....      | .....      |
| RO33                | .....       | .....      | .....      | .....      | .....      | .....       | .....      | .....      |
| Palo Alto           | .....       | .....      | .....      | .....      | .....      | .....       | .....      | .....      |
| FCR3                | .....       | .....      | .....      | .....      | .....      | .....       | .....      | .....      |
| Wellcome            | .....       | .....      | .....      | .....      | .....      | .....       | .....      | .....      |
| D6                  | .....       | .....      | .....      | .....      | .....      | .....       | .....      | .....      |
| T996                | .....       | .....      | .....      | .....      | .....      | .....       | .....      | .....      |
| T9102               | .....       | .....      | .....      | .....      | .....      | .....       | .....      | .....      |
| K1                  | .....       | .....      | .....      | .....      | .....      | .....       | .....      | .....      |
| Dd2                 | .....       | .....      | .....      | .....      | .....      | .....       | .....      | .....      |
| D10                 | .....       | .....      | .....      | .....      | .....      | .....       | .....      | .....      |
| FCC2                | .....       | .....      | .....      | .....      | .....      | .....       | .....      | .....      |
| HB3                 | .....       | .....      | .....      | .....      | .....      | .....       | .....      | .....      |
| 7G8                 | .....       | .....      | .....      | .....      | .....      | .....       | .....      | .....      |
| <i>P.reichenowi</i> | .....A..... | .....      | .....      | .....      | .....      | .....A..... | .....      | .....      |

|                     | 2490          | 2500        | 2510        | 2520       | 2530       | 2540       | 2550        | 2560       |
|---------------------|---------------|-------------|-------------|------------|------------|------------|-------------|------------|
| PF13_0348           | AAATTATAAA    | ACAACTTTGC  | TTAACCAACA  | AATAAATGTG | AACCAAAAAA | ATGAACACAC | ACATAAATGT  | ATACATTCAA |
| 3D7                 | .....         | .....       | .....       | .....      | .....      | .....      | .....       | .....      |
| RO33                | .....         | .....       | .....       | .....      | .....      | .....      | .....       | .....      |
| Palo Alto           | .....         | .....       | .....       | .....      | .....      | .....      | .....       | .....      |
| FCR3                | .....         | .....       | .....       | .....      | .....      | .....      | .....       | .....      |
| Wellcome            | .....         | .....       | .....       | .....      | .....      | .....      | .....       | .....      |
| D6                  | .....         | .....       | .....       | .....      | .....      | .....      | .....       | .....      |
| T996                | .....         | .....       | .....       | .....      | .....      | .....      | .....       | .....      |
| T9102               | .....         | .....       | .....       | .....      | .....      | .....      | .....       | .....      |
| K1                  | .....         | .....       | .....       | .....      | .....      | .....      | .....       | .....      |
| Dd2                 | .....         | .....       | .....       | .....      | .....      | .....      | .....       | .....      |
| D10                 | .....         | .....       | .....       | .....      | .....      | .....      | .....       | .....      |
| FCC2                | .....         | .....       | .....       | .C.....    | .....      | .....      | .....       | .....      |
| HB3                 | .....         | .....       | .....       | .....      | .....      | .....      | .....       | .....      |
| 7G8                 | .....         | .....       | .....       | .....      | .....      | .....      | .....       | .....      |
| <i>P.reichenowi</i> | .....C.C..... | .....A..... | .....G..... | .....      | .....      | .....      | .....C..... | .....      |

|                     | 2570      | 2580       | 2590       | 2600       | 2610      | 2620       | 2630        | 2640      |
|---------------------|-----------|------------|------------|------------|-----------|------------|-------------|-----------|
| PF13_0348           | ATCAAGTGA | ACAAGAAAAT | GAAATCGTTT | TATATTCGGA | CGAATTAAC | ATTGATTATT | TTCTTTTCCCT | TATGATTTT |
| 3D7                 | .....     | .....      | .....      | .....      | .....     | .....      | .....       | .....     |
| RO33                | .....     | .....      | .....      | .....      | .....     | .....      | .....       | .....     |
| Palo Alto           | .....     | .....      | .....      | .....      | .....     | .....      | .....       | .....     |
| FCR3                | .....     | .....      | .....      | .....      | .....     | .....      | .....       | .....     |
| Wellcome            | .....     | .....      | .....      | .....      | .....     | .....      | .....       | .....     |
| D6                  | .....     | .....      | .....      | .....      | .....     | .....      | .....       | .....     |
| T996                | .....     | .....      | .....      | .....      | .....     | .....      | .....       | .....     |
| T9102               | .....T    | .....      | .....      | .....      | .....     | .....      | .....       | .....     |
| K1                  | .....     | .....      | .....      | .....      | .....     | .....      | .....       | .....     |
| Dd2                 | .....T    | .....      | .....      | .....      | .....     | .....      | .....       | .....     |
| D10                 | .....     | .....      | .....      | .....      | .....     | .....      | .....       | .....     |
| FCC2                | .....     | .....      | .....      | .....      | .....     | .....      | .....       | .....     |
| HB3                 | .....     | .....      | .....      | .....      | .....     | .....      | .....       | .....     |
| 7G8                 | .....     | .....      | .....      | .....      | .....     | .....      | .....       | .....     |
| <i>P.reichenowi</i> | .....G    | .....      | .....      | .....      | .....     | .....      | .....       | .....     |

|                     | 2650      | 2660       | 2670       | 2680       | 2690       | 2700       | 2710       | 2720       |
|---------------------|-----------|------------|------------|------------|------------|------------|------------|------------|
| PF13_0348           | GAAAAGAAG | TGGAGCAAAA | CTTTTCAAAC | TATTTAATAA | ACAAGATAAA | TGAATGTAAA | AAATTTAAAA | CAACTGATAA |
| 3D7                 | .....     | .....      | .....      | .....      | .....      | .....      | .....      | .....      |
| RO33                | .....     | .....      | .....      | .....      | .....      | .....      | .....      | .....      |
| Palo Alto           | .....     | .....      | .....      | .....      | .....      | .....      | .....      | .....      |
| FCR3                | .....     | .....      | .....      | .....      | .....      | .....      | .....      | .....      |
| Wellcome            | .....     | .....      | .....      | .....      | .....      | .....      | .....      | .....      |
| D6                  | .....     | .....      | .....      | .....      | .....      | .....      | .....      | .....      |
| T996                | .....     | .....      | .....      | .....      | .....      | .....      | .....      | .....      |
| T9102               | .....     | .....      | .....      | .....      | .....      | .....      | .....      | .....      |
| K1                  | .....     | .....      | .....      | .....      | .....      | .....      | .....      | .....      |
| Dd2                 | .....     | .....      | .....      | .....      | .....      | .....      | .....      | .....      |
| D10                 | .....     | .....      | .....      | .....      | .....      | .....      | .....      | .....      |
| FCC2                | .....     | .....      | .....      | .....      | .....      | .....      | .....      | .....      |
| HB3                 | .....     | .....      | .....      | .....      | .....      | .....      | .....      | .....      |
| 7G8                 | .....     | .....      | .....      | .....      | .....      | .....      | .....      | .....      |
| <i>P.reichenowi</i> | .....T..A | .....      | .....      | .....      | .....      | .....      | .....TT    | .....      |

|                     | 2730       | 2740       | 2750       | 2760       | 2770       | 2780       | 2790       | 2800       |
|---------------------|------------|------------|------------|------------|------------|------------|------------|------------|
| PF13_0348           | TACATATACA | AACACGGACA | ACAAGACGCA | CGTATCTAAA | GATGTATTGG | TTCATTTTGA | TGATGATATA | TTTCTTAAAA |
| 3D7                 | .....      | .....      | .....      | .....      | .....      | .....      | .....      | .....      |
| RO33                | .....      | .....      | .....      | .....      | .....      | .....      | .....      | .....      |
| Palo Alto           | .....      | .....      | .....      | .....      | .....      | .....      | .....      | .....      |
| FCR3                | .....      | .....      | .....      | .....      | .....      | .....      | .....      | .....      |
| Wellcome            | .....      | .....      | .....      | .....      | .....      | .....      | .....      | .....      |
| D6                  | .....      | .....      | .....      | .....      | .....      | .....      | .....      | .....      |
| T996                | .....      | .....      | .....      | .....      | .....      | .....      | .....      | .....      |
| T9102               | .....      | .....      | .....      | .....      | .....      | .....      | .....      | .....      |
| K1                  | .....      | .....      | .....      | .....      | .....      | .....      | .....      | .....      |
| Dd2                 | .....      | .....      | .....      | .....      | .....      | .....      | .....      | .....      |
| D10                 | .....      | .....      | .....      | .....      | .....      | .....      | .....      | .....      |
| FCC2                | .....      | .....      | .....      | .....      | .....      | .....      | .....      | .....      |
| HB3                 | .....      | .....      | .....      | .....      | .....      | .....      | .....      | .....      |
| 7G8                 | .....      | .....      | .....      | .....      | .....      | .....      | .....      | .....      |
| <i>P.reichenowi</i> | .....A     | .....G..C  | .....T     | .....      | .....A     | .....G..A  | .....      | .....G     |

|                     | 2810       | 2820       | 2830       | 2840       | 2850       | 2860          | 2870            | 2880            |
|---------------------|------------|------------|------------|------------|------------|---------------|-----------------|-----------------|
| PF13_0348           | AATCAATTGA | TGTGTCAACC | AAAATTTCTC | GTGATGTATC | AAATAAAATG | TCT-----      | -----           | -----           |
| 3D7                 | .....      | .....      | .....      | .....      | .....      | -----         | -----           | -----           |
| RO33                | .....      | .....      | .....      | .....      | .....      | -----         | -----           | -----           |
| Palo Alto           | .....      | .....      | .....      | .....      | .....      | -----         | -----           | -----           |
| FCR3                | .....      | .....      | .....T     | .....      | .....      | -----         | -----           | -----           |
| Wellcome            | .....      | .....      | .....T     | .....      | .....      | -----         | -----           | -----           |
| D6                  | .....      | .....      | .....      | .....      | .....      | -----         | -----           | -----           |
| T996                | .....      | .....      | .....      | .....      | .....      | -----         | -----           | -----           |
| T9102               | .....      | .....      | .....      | .....      | .....      | -----         | -----           | -----           |
| K1                  | .....      | .....      | .....      | .....      | .....      | -----         | -----           | -----           |
| Dd2                 | .....      | .....      | .....      | .....      | .....      | -----         | -----           | -----           |
| D10                 | .....      | .....      | .....      | .....      | .....      | -----         | -----           | -----           |
| FCC2                | .....      | .....      | .....      | .....      | .....      | -----         | -----           | -----           |
| HB3                 | .....      | .....      | .....      | .....      | .....      | -----         | -----           | -----           |
| 7G8                 | .....      | .....      | .....      | .....      | .....      | -----         | -----           | -----           |
| <i>P.reichenowi</i> | .....      | .....      | .....G     | .....CG    | .....      | .....AGGTGATG | .....TGTCAAATAA | .....AATGTCTGTT |

|                     | 2890                                                  | 2900         | 2910       | 2920       | 2930       | 2940       | 2950       | 2960       |
|---------------------|-------------------------------------------------------|--------------|------------|------------|------------|------------|------------|------------|
| PF13_0348           | ..... ..... ..... ..... ..... ..... ..... ..... ..... |              |            |            |            |            |            |            |
| 3D7                 | -----                                                 | -----        | -----      | -----      | -----      | -----      | -----      | -----      |
| RO33                | -----                                                 | -----        | -----      | -----      | -----      | -----      | -----      | -----      |
| Palo Alto           | -----                                                 | -----        | -----      | -----      | -----      | -----      | -----      | -----      |
| FCR3                | -----                                                 | -----        | -----      | -----      | -----      | -----      | -----      | -----      |
| Wellcome            | -----                                                 | -----        | -----      | -----      | -----      | -----      | -----      | -----      |
| D6                  | -----                                                 | -----        | -----      | -----      | -----      | -----      | -----      | -----      |
| T996                | -----                                                 | -----        | -----      | -----      | -----      | -----      | -----      | -----      |
| T9102               | -----                                                 | -----        | -----      | -----      | -----      | -----      | -----      | -----      |
| K1                  | -----                                                 | -----        | -----      | -----      | -----      | -----      | -----      | -----      |
| Dd2                 | -----                                                 | -----        | -----      | -----      | -----      | -----      | -----      | -----      |
| D10                 | -----                                                 | -----        | -----      | -----      | -----      | -----      | -----      | -----      |
| FCC2                | -----                                                 | -----        | -----      | -----      | -----      | -----      | -----      | -----      |
| HB3                 | -----                                                 | -----        | -----      | -----      | -----      | -----      | -----      | -----      |
| 7G8                 | -----                                                 | -----        | -----      | -----      | -----      | -----      | -----      | -----      |
| <i>P.reichenowi</i> | GATGTGTC                                              | CAATAAAATGTC | TGTTGATGTG | TCAAATAAAA | TGTCTGGTGA | TGTGTCAAAT | AAAATGTCTG | TTGATGTGTC |

|                     | 2970                                                  | 2980       | 2990       | 3000       | 3010     | 3020         | 3030       | 3040       |
|---------------------|-------------------------------------------------------|------------|------------|------------|----------|--------------|------------|------------|
| PF13_0348           | ..... ..... ..... ..... ..... ..... ..... ..... ..... |            |            |            |          |              |            |            |
| 3D7                 | -----                                                 | -----      | -----      | -----      | -----    | -----        | -----      | -----      |
| RO33                | -----                                                 | -----      | -----      | -----      | -----    | -----        | -----      | -----      |
| Palo Alto           | -----                                                 | -----      | -----      | -----      | -----    | -----        | -----      | -----      |
| FCR3                | -----                                                 | -----      | -----      | -----      | -----    | -----        | -----      | -----      |
| Wellcome            | -----                                                 | -----      | -----      | -----      | -----    | -----        | -----      | -----      |
| D6                  | -----                                                 | -----      | -----      | -----      | -----    | -----        | -----      | -----      |
| T996                | -----                                                 | -----      | -----      | -----      | -----    | -----        | -----      | -----      |
| T9102               | -----                                                 | -----      | -----      | -----      | -----    | -----        | -----      | -----      |
| K1                  | -----                                                 | -----      | -----      | -----      | -----    | -----        | -----      | -----      |
| Dd2                 | -----                                                 | -----      | -----      | -----      | -----    | -----        | -----      | -----      |
| D10                 | -----                                                 | -----      | -----      | -----      | -----    | -----        | -----      | -----      |
| FCC2                | -----                                                 | -----      | -----      | -----      | -----    | -----        | -----      | -----      |
| HB3                 | -----                                                 | -----      | -----      | -----      | -----    | -----        | -----      | -----      |
| 7G8                 | -----                                                 | -----      | -----      | -----      | -----    | -----        | -----      | -----      |
| <i>P.reichenowi</i> | AAATAAAATG                                            | TCTGTTGATG | TGTCAAATAA | AATGTCGTGT | GATGTGTC | CAATAAAATGTC | TGGTGTGATG | TCAAATAAAA |

|                     | 3050                                                  | 3060       | 3070        | 3080       | 3090       | 3100       | 3110      | 3120       |
|---------------------|-------------------------------------------------------|------------|-------------|------------|------------|------------|-----------|------------|
| PF13_0348           | ..... ..... ..... ..... ..... ..... ..... ..... ..... |            |             |            |            |            |           |            |
| 3D7                 | -----                                                 | -----      | -----       | -----      | -----      | -----      | -----     | -----GTT   |
| RO33                | -----                                                 | -----      | -----       | -----      | -----      | -----      | -----     | -----      |
| Palo Alto           | -----                                                 | -----      | -----       | -----      | -----      | -----      | -----     | -----      |
| FCR3                | -----                                                 | -----      | -----       | -----      | -----      | -----      | -----     | -----      |
| Wellcome            | -----                                                 | -----      | -----       | -----      | -----      | -----      | -----     | -----      |
| D6                  | -----                                                 | -----      | -----       | -----      | -----      | -----      | -----     | -----      |
| T996                | -----                                                 | -----      | -----       | -----      | -----      | -----      | -----     | -----      |
| T9102               | -----                                                 | -----      | -----       | -----      | -----      | -----      | -----     | -----      |
| K1                  | -----                                                 | -----      | -----       | -----      | -----      | -----      | -----     | -----      |
| Dd2                 | -----                                                 | -----      | -----       | -----      | -----      | -----      | -----     | -----      |
| D10                 | -----                                                 | -----      | -----       | -----      | -----      | -----      | -----     | -----      |
| FCC2                | -----                                                 | -----      | -----       | -----      | -----      | -----      | -----     | -----      |
| HB3                 | -----                                                 | -----      | -----       | -----      | -----      | -----      | -----     | -----      |
| 7G8                 | -----                                                 | -----      | -----       | -----      | -----      | -----      | -----     | -----      |
| <i>P.reichenowi</i> | TGTCTGTGA                                             | TATGTCGTGT | GATATGTCGTG | TTGATATGTT | TGGTGATATG | TCTGTTGATA | TGCTGGTGA | TATGTCTA.. |

|                     | 3130                                                  | 3140  | 3150  | 3160  | 3170  | 3180     | 3190  | 3200  |
|---------------------|-------------------------------------------------------|-------|-------|-------|-------|----------|-------|-------|
| PF13_0348           | ..... ..... ..... ..... ..... ..... ..... ..... ..... |       |       |       |       |          |       |       |
| 3D7                 | -----                                                 | ----- | ----- | ----- | ----- | -----    | ----- | ----- |
| RO33                | -----                                                 | ----- | ----- | ----- | ----- | -----    | ----- | ----- |
| Palo Alto           | -----                                                 | ----- | ----- | ----- | ----- | -----    | ----- | ----- |
| FCR3                | -----                                                 | ----- | ----- | ----- | ----- | -----    | ----- | ----- |
| Wellcome            | -----                                                 | ----- | ----- | ----- | ----- | -----    | ----- | ----- |
| D6                  | -----                                                 | ----- | ----- | ----- | ----- | -----    | ----- | ----- |
| T996                | -----                                                 | ----- | ----- | ----- | ----- | -----    | ----- | ----- |
| T9102               | -----                                                 | ----- | ----- | ----- | ----- | -----    | ----- | ----- |
| K1                  | -----                                                 | ----- | ----- | ----- | ----- | -----    | ----- | ----- |
| Dd2                 | -----                                                 | ----- | ----- | ----- | ----- | -----    | ----- | ----- |
| D10                 | -----                                                 | ----- | ----- | ----- | ----- | -----    | ----- | ----- |
| FCC2                | -----                                                 | ----- | ----- | ----- | ----- | -----    | ----- | ----- |
| HB3                 | -----                                                 | ----- | ----- | ----- | ----- | -----    | ----- | ----- |
| 7G8                 | -----                                                 | ----- | ----- | ----- | ----- | -----    | ----- | ----- |
| <i>P.reichenowi</i> | ..A..                                                 | ..G.. | ..... | ..... | ..... | ..T..A.. | ..T.. | ..... |

|                     | 3210       | 3220       | 3230       | 3240       | 3250       | 3260       | 3270        | 3280       |
|---------------------|------------|------------|------------|------------|------------|------------|-------------|------------|
| PF13_0348           | AGACAGCAGC | GATAATAATA | ATAATAATAA | TAATAATAAT | AATAAT---- | -----      | -----GATAGT | AGTAATAATA |
| 3D7                 | .....      | .....      | .....      | .....      | .....      | -----      | -----       | -----      |
| RO33                | .....      | .....      | .....      | .....      | .....      | -----      | -----       | -----      |
| Palo Alto           | .....      | .....      | .....      | .....      | .....AAT-  | -----      | -----       | -----      |
| FCR3                | .....      | .....      | .....      | .....      | .....AAT-  | -----      | -----       | -----      |
| Wellcome            | .....      | .....      | .....      | .....      | .....AAT-  | -----      | -----       | -----      |
| D6                  | .....      | .....      | .....      | .....      | .....      | -----      | -----       | -----      |
| T996                | .....      | .....      | .....      | .....      | .....AAT-  | -----      | -----       | -----      |
| T9102               | .....      | .....      | .....      | .....      | .....      | -----      | -----       | -----      |
| K1                  | .....      | .....      | .....      | .....      | .....AATA  | ATAATAATAA | TAAT.....   | -----      |
| Dd2                 | .....      | .....      | .....      | .....      | .....      | -----      | -----       | -----      |
| D10                 | .....      | .....      | .....      | .....      | .....      | -----      | -----       | -----      |
| FCC2                | .....      | .....      | .....      | .....      | .....      | -----      | -----       | -----      |
| HB3                 | .....      | .....      | .....      | .....      | .....      | -----      | -----       | -----      |
| 7G8                 | .....      | .....      | .....      | .....      | .....      | -----      | -----       | -----      |
| <i>P.reichenowi</i> | .....      | .....      | .....      | .....      | .....      | -----      | -----       | -----      |

|                     | 3290       | 3300      | 3310       | 3320       | 3330      | 3340       | 3350       | 3360      |
|---------------------|------------|-----------|------------|------------|-----------|------------|------------|-----------|
| PF13_0348           | ATAGTAGTAA | TAATAAT-- | -----      | -----AGTAA | T-----    | -----      | -----      | -----     |
| 3D7                 | .....      | .....     | .....      | .....      | .....     | -----      | -----      | -----     |
| RO33                | .....      | .....AGT  | AGTAATAATA | AT-----    | -----     | -----      | -----      | -----     |
| Palo Alto           | .....      | .....     | .....      | .....      | .....     | -----      | -----      | -----     |
| FCR3                | .....      | .....     | .....      | .....      | .....     | -----      | -----      | -----     |
| Wellcome            | .....      | .....     | .....      | .....      | .....     | -----      | -----      | -----     |
| D6                  | .....      | .....AGT  | AGTAATAATA | AT-----    | -----     | -----      | -----      | -----     |
| T996                | .....      | .....AGT  | AGTAATAATA | AT-----    | -----     | -----      | -----      | -----     |
| T9102               | .....      | .....AGT  | AGTAATAATA | ATAGT..... | AATAATAGT | AAT-----   | -----      | -----     |
| K1                  | .....      | .....AGT  | AGTAATAATA | AT-----    | -----     | -----      | -----      | -----     |
| Dd2                 | .....      | .....AGT  | AGTAATAATA | ATAGT..... | AATAATAGT | AAT-----   | -----      | -----     |
| D10                 | .....      | .....AGT  | AGTAATAATA | AT-----    | -----     | -----      | -----      | -----     |
| FCC2                | .....      | .....AGT  | AAT-----   | -----      | -----     | -----      | -----      | -----     |
| HB3                 | .....      | .....AGT  | AGTAATAATA | AT-----    | -----     | -----      | -----      | -----     |
| 7G8                 | .....      | .....AGT  | AAT-----   | -----      | -----     | -----      | -----      | -----     |
| <i>P.reichenowi</i> | -----      | -----     | -----      | -----      | -----     | ---AGGGGAA | GCCAAGAGAT | CCATTTAAT |

|                     | 3370       | 3380       | 3390       | 3400       | 3410       | 3420       | 3430       | 3440       |
|---------------------|------------|------------|------------|------------|------------|------------|------------|------------|
| PF13_0348           | -----      | -----      | -----      | -----      | -----      | -----      | -----      | -----      |
| 3D7                 | -----      | -----      | -----      | -----      | -----      | -----      | -----      | -----      |
| RO33                | -----      | -----      | -----      | -----      | -----      | -----      | -----      | -----      |
| Palo Alto           | -----      | -----      | -----      | -----      | -----      | -----      | -----      | -----      |
| FCR3                | -----      | -----      | -----      | -----      | -----      | -----      | -----      | -----      |
| Wellcome            | -----      | -----      | -----      | -----      | -----      | -----      | -----      | -----      |
| D6                  | -----      | -----      | -----      | -----      | -----      | -----      | -----      | -----      |
| T996                | -----      | -----      | -----      | -----      | -----      | -----      | -----      | -----      |
| T9102               | -----      | -----      | -----      | -----      | -----      | -----      | -----      | -----      |
| K1                  | -----      | -----      | -----      | -----      | -----      | -----      | -----      | -----      |
| Dd2                 | -----      | -----      | -----      | -----      | -----      | -----      | -----      | -----      |
| D10                 | -----      | -----      | -----      | -----      | -----      | -----      | -----      | -----      |
| FCC2                | -----      | -----      | -----      | -----      | -----      | -----      | -----      | -----      |
| HB3                 | -----      | -----      | -----      | -----      | -----      | -----      | -----      | -----      |
| 7G8                 | -----      | -----      | -----      | -----      | -----      | -----      | -----      | -----      |
| <i>P.reichenowi</i> | AAATGTGACA | TTCTAAAGAA | TGAAGAGTAC | AATGTGTCGA | ATGAATATAA | GAATAAAAAG | TTTATAGATA | TGTCAAATAA |

|                     | 3450      | 3460       | 3470       | 3480       | 3490       | 3500       | 3510     | 3520  |
|---------------------|-----------|------------|------------|------------|------------|------------|----------|-------|
| PF13_0348           | -----     | -----      | -----      | -----      | -----      | -----      | -----    | ----- |
| 3D7                 | -----     | -----      | -----      | -----      | -----      | -----      | -----    | ----- |
| RO33                | -----     | -----      | -----      | -----      | -----      | -----      | -----    | ----- |
| Palo Alto           | -----     | -----      | -----      | -----      | -----      | -----      | -----    | ----- |
| FCR3                | -----     | -----      | -----      | -----      | -----      | -----      | -----    | ----- |
| Wellcome            | -----     | -----      | -----      | -----      | -----      | -----      | -----    | ----- |
| D6                  | -----     | -----      | -----      | -----      | -----      | -----      | -----    | ----- |
| T996                | -----     | -----      | -----      | -----      | -----      | -----      | -----    | ----- |
| T9102               | -----     | -----      | -----      | -----      | -----      | -----      | -----    | ----- |
| K1                  | -----     | -----      | -----      | -----      | -----      | -----      | -----    | ----- |
| Dd2                 | -----     | -----      | -----      | -----      | -----      | -----      | -----    | ----- |
| D10                 | -----     | -----      | -----      | -----      | -----      | -----      | -----    | ----- |
| FCC2                | -----     | -----      | -----      | -----      | -----      | -----      | -----    | ----- |
| HB3                 | -----     | -----      | -----      | -----      | -----      | -----      | -----    | ----- |
| 7G8                 | -----     | -----      | -----      | -----      | -----      | -----      | -----    | ----- |
| <i>P.reichenowi</i> | AAATGTGCA | AATGTTTGTG | TGAATATAAA | TAATATACAA | GATAATAGAA | ATAATAATAA | TAA..... | ----- |



|                     | 3850        | 3860        | 3870        | 3880        | 3890        | 3900        | 3910        | 3920        |
|---------------------|-------------|-------------|-------------|-------------|-------------|-------------|-------------|-------------|
| PF13_0348           | AATAAATAAT  | GTGATGATAG  | TAAATGCTTG  | AAGAGCATTG  | AGAATAGAAA  | TAATAATAGA  | GATATTAAAA  | ATAATAAGAT  |
| 3D7                 | .....       | .....       | .....       | .....       | .....       | .....       | .....       | .....       |
| RO33                | .....       | .....       | .....       | .....       | .....       | .....       | .....       | .....       |
| Palo Alto           | .....       | .....       | .....       | .....       | .....       | .....       | .....       | .....       |
| FCR3                | .....       | .....       | .....       | .....       | .....       | .....       | .....       | .....       |
| Wellcome            | .....       | .....       | .....       | .....       | .....       | .....       | .....       | .....       |
| D6                  | .....       | .....       | .....       | .....       | .....       | .....       | .....T..... | .....       |
| T996                | .....       | .....       | .....       | .....       | .....       | .....       | .....       | .....       |
| T9102               | .....       | .....       | .....       | .....       | .....       | .....       | .....       | .....       |
| K1                  | .....       | .....       | .....       | .....       | .....       | .....       | .....       | .....       |
| Dd2                 | .....       | .....       | .....       | .....       | .....       | .....       | .....       | .....       |
| D10                 | .....       | .....       | .....       | .....       | .....       | .....       | .....       | .....       |
| FCC2                | .....       | .....       | .....       | .....       | .....       | .....       | .....       | .....       |
| HB3                 | .....       | .....       | .....       | .....       | .....       | .....       | .....       | .....       |
| 7G8                 | .....       | .....       | .....       | .....       | .....       | .....       | .....       | .....       |
| <i>P.reichenowi</i> | .....G..... | .....A..... | .....T..... | .....A..... | .....A..... | .....T..... | .....       | .....G..... |

|                     | 3930       | 3940       | 3950        | 3960        | 3970        | 3980       | 3990       | 4000        |
|---------------------|------------|------------|-------------|-------------|-------------|------------|------------|-------------|
| PF13_0348           | TGAAGGAGAA | AGCACTGATT | CTTTATACAC  | CTCTAGTTCA  | GAAGATGAAT  | ATAATGATAG | ACATGATAAT | ATAAAGAAAA  |
| 3D7                 | .....      | .....      | .....       | .....       | .....       | .....      | .....      | .....       |
| RO33                | .....      | .....      | .....       | .....       | .....       | .....      | .....      | .....       |
| Palo Alto           | .....      | .....      | .....       | .....       | .....       | .....      | .....      | .....       |
| FCR3                | .....      | .....      | .....       | .....       | .....       | .....      | .....      | .....       |
| Wellcome            | .....      | .....      | .....       | .....       | .....       | .....      | .....      | .....       |
| D6                  | .....      | .....      | .....       | .....       | .....       | .....      | .....      | .....       |
| T996                | .....      | .....      | .....       | .....       | .....       | .....      | .....      | .....       |
| T9102               | .....      | .....      | .....       | .....       | .....       | .....      | .....      | .....       |
| K1                  | .....      | .....      | .....       | .....       | .....       | .....      | .....      | .....       |
| Dd2                 | .....      | .....      | .....       | .....       | .....       | .....      | .....      | .....       |
| D10                 | .....      | .....      | .....       | .....       | .....       | .....      | .....      | .....       |
| FCC2                | .....      | .....      | .....       | .....       | .....       | .....      | .....      | .....       |
| HB3                 | .....      | .....      | .....       | .....       | .....       | .....      | .....      | .....       |
| 7G8                 | .....      | .....      | .....       | .....       | .....       | .....      | .....      | .....       |
| <i>P.reichenowi</i> | .....      | .....      | .....C..... | .....G..... | .....C..... | .....      | .....      | .....A..... |

|                     | 4010        | 4020        | 4030      | 4040       | 4050        | 4060      | 4070      | 4080       |
|---------------------|-------------|-------------|-----------|------------|-------------|-----------|-----------|------------|
| PF13_0348           | TAAAAAAGAG  | AACAGATATT  | GAAATGAAA | TTATTTTATT | AAAAATATA   | AGACCTTTC | CACTATTTA | TTGGTTAATA |
| 3D7                 | .....       | .....       | .....     | .....      | .....       | .....     | .....     | .....      |
| RO33                | .....       | .....       | .....     | .....      | .....       | .....     | .....     | .....      |
| Palo Alto           | .....       | .....       | .....     | .....      | .....       | .....     | .....     | .....      |
| FCR3                | .....       | .....       | .....     | .....      | .....       | .....     | .....     | .....      |
| Wellcome            | .....       | .....       | .....     | .....      | .....       | .....     | .....     | .....      |
| D6                  | .....       | .....       | .....     | .....      | .....       | .....     | .....     | .....      |
| T996                | .....       | .....       | .....     | .....      | .....       | .....     | .....     | .....      |
| T9102               | .....       | .....       | .....     | .....      | .....       | .....     | .....     | .....      |
| K1                  | .....       | .....       | .....     | .....      | .....       | .....     | .....     | .....      |
| Dd2                 | .....       | .....       | .....     | .....      | .....       | .....     | .....     | .....      |
| D10                 | .....       | .....       | .....     | .....      | .....       | .....     | .....     | .....      |
| FCC2                | .....       | .....       | .....     | .....      | .....       | .....     | .....     | .....      |
| HB3                 | .....       | .....       | .....     | .....      | .....       | .....     | .....     | .....      |
| 7G8                 | .....       | .....       | .....     | .....      | .....       | .....     | .....     | .....      |
| <i>P.reichenowi</i> | .....A..... | .....A..... | .....     | .....      | .....T..... | .....     | .....     | .....      |

|                     | 4090       | 4100       | 4110       | 4120      | 4130       | 4140        | 4150       | 4160       |
|---------------------|------------|------------|------------|-----------|------------|-------------|------------|------------|
| PF13_0348           | AATAAAAATA | TATGTGGATA | TATATCTCAT | TTGGAAAAA | TAAATATTAT | AAAAAATATT  | GAAAATTTTA | TTAATCATCC |
| 3D7                 | .....      | .....      | .....      | .....     | .....      | .....       | .....      | .....      |
| RO33                | .....      | .....      | .....      | .....     | .....      | .....       | .....      | .....      |
| Palo Alto           | .....      | .....      | .....      | .....     | .....      | .....       | .....      | .....      |
| FCR3                | .....      | .....      | .....      | .....     | .....      | .....       | .....      | .....      |
| Wellcome            | .....      | .....      | .....      | .....     | .....      | .....       | .....      | .....      |
| D6                  | .....      | .....      | .....      | .....     | .....      | .....       | .....      | .....      |
| T996                | .....      | .....      | .....      | .....     | .....      | .....       | .....      | .....      |
| T9102               | .....      | .....      | .....      | .....     | .....      | .....       | .....      | .....      |
| K1                  | .....      | .....      | .....      | .....     | .....      | .....       | .....      | .....      |
| Dd2                 | .....      | .....      | .....      | .....     | .....      | .....       | .....      | .....      |
| D10                 | .....      | .....      | .....      | .....     | .....      | .....       | .....      | .....      |
| FCC2                | .....      | .....      | .....      | .....     | .....      | .....       | .....      | .....      |
| HB3                 | .....      | .....      | .....      | .....     | .....      | .....       | .....      | .....      |
| 7G8                 | .....      | .....      | .....      | .....     | .....      | .....       | .....      | .....      |
| <i>P.reichenowi</i> | .....      | .....      | .....      | .....     | .....      | .....C..... | .....      | .....      |



```

          4490      4500      4510      4520      4530      4540      4550      4560
.....|.....| .....|.....| .....|.....| .....|.....| .....|.....| .....|.....|
PF13_0348 TATCAAACCT TCTAACTTTA AAATGTATAC ACTTATATTT TGCATCCCAT TTATCTTATC CAAATACTGT TGGTTATATA
3D7
RO33
Palo Alto
FCR3
Wellcome
D6
T996
T9102
K1
Dd2
D10
FCC2
HB3
7G8
P.reichenowi .C..... C.G ..... ..... ..... A.....

```

```

          4570      4580
.....|.....| .....|.....| .....
PF13_0348 ATAGAGGAAT ATTTAAGTC ATAA
3D7
RO33
Palo Alto
FCR3
Wellcome
D6
T996
T9102
K1
Dd2
D10
FCC2
HB3
7G8
P.reichenowi ..T.....

```

**PF10\_0144**

```

          10      20      30      40      50      60      70      80
.....|.....| .....|.....| .....|.....| .....|.....| .....|.....|
PF10-0144 ATGTATAAAT TTAAATTAA ATTAAGGAAC ATTTACAAAA TTCATTCAA GCCTTATATT AACATGAATG CTCCTCCTAA
3D7
RO33
PALO ALTO
FCR3
WELLCOME
D6
T996
T9102
K1
Dd2
D10
FCC2
HB3
7G8
P.reichenowi ..... T..... T..... A.....

```

```

          90      100      110      120      130      140      150      160
.....|.....| .....|.....| .....|.....| .....|.....| .....|.....|
PF10_144 TTTTGACATA CATCAGGTTA AGAAATTAGG GAAATTAGGT GCAACTATAG GAGCAATAAT AGGTGTAAC TCATTGGTA
3D7
RO33
PALO ALTO
FCR3
WELLCOME
D6
T996
T9102
K1
Dd2
D10
FCC2
HB3
7G8
P.reichenowi ..... A.....

```







|                     |           |           |             |           |            |            |           |            |
|---------------------|-----------|-----------|-------------|-----------|------------|------------|-----------|------------|
|                     | 810       | 820       | 830         | 840       | 850        | 860        | 870       | 880        |
| PF10_144            | ATTATGGAA | TTAAAAAAA | TTGAATTGC   | AAGAGAAGT | TCAAATATCA | TATCAAAATG | TCAAAAAAG | GTTATGTTAC |
| 3D7                 | .....     | .....     | .....       | .....     | .....      | .....      | .....     | .....      |
| RO33                | .....     | .....     | .....       | .....     | .....      | .....      | .....     | .....      |
| Palo Alto           | .....     | .....     | .....       | .....     | .....      | .....      | .....     | .....      |
| FCR3                | .....     | .....     | .....       | .....     | .....      | .....      | .....     | .....      |
| Wellcome            | .....     | .....     | .....       | .....     | .....      | .....      | .....     | .....      |
| D6                  | .....     | .....     | .....       | .....     | .....      | .....      | .....     | .....      |
| T996                | .....     | .....     | .....       | .....     | .....      | .....      | .....     | .....      |
| T9102               | .....     | .....     | .....       | .....     | .....      | .....      | .....     | .....      |
| K1                  | .....     | .....     | .....       | .....     | .....      | .....      | .....     | .....      |
| Dd2                 | .....     | .....     | .....       | .....     | .....      | .....      | .....     | .....      |
| D10                 | .....     | .....     | .....       | .....     | .....      | .....      | .....     | .....      |
| FCC2                | .....     | .....     | .....       | .....     | .....      | .....      | .....     | .....      |
| HB3                 | .....     | .....     | .....       | .....     | .....      | .....      | .....     | .....      |
| 7G8                 | .....     | .....     | .....       | .....     | .....      | .....      | .....     | .....      |
| <i>P.reichenowi</i> | .....     | .....     | .....C..... | .....     | .....      | .....      | .....     | .....      |

|                     |            |            |                 |
|---------------------|------------|------------|-----------------|
|                     | 890        | 900        | 910             |
| PF10_144            | CTACGGATTC | GTTGTTGATA | AATTTACAA AATAA |
| 3D7                 | .....      | .....      | .....           |
| RO33                | .....      | .....      | .....           |
| Palo Alto           | .....      | .....      | .....           |
| FCR3                | .....      | .....      | .....           |
| Wellcome            | .....      | .....      | .....           |
| D6                  | .....      | .....      | .....           |
| T996                | .....      | .....      | .....           |
| T9102               | .....      | .....      | .....           |
| K1                  | .....      | .....      | .....           |
| Dd2                 | .....      | .....      | .....           |
| D10                 | .....      | .....      | .....           |
| FCC2                | .....      | .....      | .....           |
| HB3                 | .....      | .....      | .....           |
| 7G8                 | .....      | .....      | .....           |
| <i>P.reichenowi</i> | .....      | .....      | .....           |

**PF14\_0102 - RAP1**

|                     |            |            |            |            |            |             |            |            |
|---------------------|------------|------------|------------|------------|------------|-------------|------------|------------|
|                     | 10         | 20         | 30         | 40         | 50         | 60          | 70         | 80         |
| PF14_0102           | ATGAGTTTCT | ATTGGGTTAG | CTTAGTAATA | ATATTCCATG | TACTCTTCCG | TAATGTCGCT  | GATGGTATAA | ATGTAAACGG |
| 3D7                 | .....      | .....      | .....      | .....      | .....      | .....       | .....      | .....      |
| RO33                | .....      | .....      | .....      | .....      | .....      | .....       | .....      | .....      |
| Palo Alto           | .....      | .....      | .....      | .....      | .....      | .....       | .....      | .....      |
| FCR3                | .....      | .....      | .....      | .....      | .....      | .....       | .....      | .....      |
| Wellcome            | .....      | .....      | .....      | .....      | .....      | .....       | .....      | .....      |
| D6                  | .....      | .....      | .....      | .....      | .....      | .....       | .....      | .....      |
| T996                | .....      | .....      | .....      | .....      | .....      | .....       | .....      | .....      |
| T9102               | .....      | .....      | .....      | .....      | .....      | .....       | .....      | .....      |
| K1                  | .....      | .....      | .....      | .....      | .....      | .....       | .....      | .....      |
| Dd2                 | .....      | .....      | .....      | .....      | .....      | .....       | .....      | .....      |
| D10                 | .....      | .....      | .....      | .....      | .....      | .....       | .....      | .....      |
| FCC2                | .....      | .....      | .....      | .....      | .....      | .....       | .....      | .....      |
| HB3                 | .....      | .....      | .....      | .....      | .....      | .....       | .....      | .....      |
| 7G8                 | .....      | .....      | .....      | .....      | .....      | .....       | .....      | .....      |
| <i>P.reichenowi</i> | .....      | .....      | .....      | .....      | .....      | .....A..... | .....      | .....      |

|                     |            |            |              |            |            |            |            |            |
|---------------------|------------|------------|--------------|------------|------------|------------|------------|------------|
|                     | 90         | 100        | 110          | 120        | 130        | 140        | 150        | 160        |
| PF14_0102           | AGATAATAAT | TATGGGAAAA | CAATAATCAA   | TAATGATTTC | AATTTTGATG | ATTACAATTA | TTGGACACCA | ATAAATAAAA |
| 3D7                 | .....      | .....      | .....        | .....      | .....      | .....      | .....      | .....      |
| RO33                | .....      | .....      | .....        | .....      | .....      | .....      | .....      | .....      |
| Palo Alto           | .....      | .....      | .....        | .....      | .....      | .....      | .....      | .....      |
| FCR3                | .....      | .....      | .....        | .....      | .....      | .....      | .....      | .....      |
| Wellcome            | .....      | .....      | .....        | .....      | .....      | .....      | .....      | .....      |
| D6                  | .....      | .....      | .....        | .....      | .....      | .....      | .....      | .....      |
| T996                | .....      | .....      | .....        | .....      | .....      | .....      | .....      | .....      |
| T9102               | .....      | .....      | .....        | .....      | .....      | .....      | .....      | .....      |
| K1                  | .....      | .....      | .....        | .....      | .....      | .....      | .....      | .....      |
| Dd2                 | .....      | .....      | .....        | .....      | .....      | .....      | .....      | .....      |
| D10                 | .....      | .....      | .....        | .....      | .....      | .....      | .....      | .....      |
| FCC2                | .....      | .....      | .....        | .....      | .....      | .....      | .....      | .....      |
| HB3                 | .....      | .....      | .....        | .....      | .....      | .....      | .....      | .....      |
| 7G8                 | .....      | .....      | .....        | .....      | .....      | .....      | .....      | .....      |
| <i>P.reichenowi</i> | .....      | .....      | .....TC..... | .....      | .....      | .....      | .....      | .....      |

|                     | 170        | 180        | 190           | 200         | 210        | 220        | 230        | 240        |
|---------------------|------------|------------|---------------|-------------|------------|------------|------------|------------|
| PF14_0102           | AGGAAATTTT | AAATTCCTAT | GAAGATAAAT    | TTTCAAGTGA  | ATCCCTTTTA | GAAATAAAAT | CTAGTGTGTA | TGATGGAAAT |
| 3D7                 | .....      | .....      | .....         | .....       | .....      | .....      | .....      | .....      |
| RO33                | .....      | .....      | .....G.....   | .....A..... | .....      | .....      | .....      | .....      |
| Palo Alto           | .....      | .....      | .....G.....   | .....       | .....      | .....      | .....      | .....      |
| FCR3                | .....      | .....      | .....G.....   | .....       | .....      | .....      | .....      | .....      |
| Wellcome            | .....      | .....      | .....G.....   | .....       | .....      | .....      | .....      | .....      |
| D6                  | .....      | .....      | .....A.G..... | .....       | .....      | .....      | .....      | .....      |
| T996                | .....      | .....      | .....G.....   | .....       | .....      | .....      | .....      | .....      |
| T9102               | .....      | .....      | .....A.G..... | .....       | .....      | .....      | .....      | .....      |
| K1                  | .....      | .....      | .....G.....   | .....       | .....      | .....      | .....      | .....      |
| Dd2                 | .....      | .....      | .....A.G..... | .....       | .....      | .....      | .....      | .....      |
| D10                 | .....      | .....      | .....G.....   | .....       | .....      | .....      | .....      | .....      |
| FCC2                | .....      | .....      | .....G.....   | .....       | .....      | .....      | .....      | .....      |
| HB3                 | .....      | .....      | .....         | .....       | .....      | .....      | .....      | .....      |
| 7G8                 | .....      | .....      | .....         | .....       | .....      | .....      | .....      | .....      |
| <i>P.reichenowi</i> | .....      | .....      | .....G.....   | .....       | .....      | .....      | .....      | .....      |

|                     | 250       | 260        | 270         | 280       | 290         | 300        | 310        | 320        |
|---------------------|-----------|------------|-------------|-----------|-------------|------------|------------|------------|
| PF14_0102           | ATAAATTAA | CAGATACAAG | TACATCAAAT  | AAAAGTCTA | AAAAAGGACA  | TGGTAGAAGT | AGAGTAAGAT | CAGCATCAGC |
| 3D7                 | .....     | .....      | .....       | .....     | .....       | .....      | .....      | .....      |
| RO33                | .....     | .....      | .....       | .....     | .....       | .....      | .....      | .....      |
| Palo Alto           | .....     | .....      | .....       | .....     | .....       | .....      | .....      | .....      |
| FCR3                | .....     | .....      | .....       | .....     | .....       | .....      | .....      | .....      |
| Wellcome            | .....     | .....      | .....       | .....     | .....       | .....      | .....      | .....      |
| D6                  | .....     | .....      | .....       | .....     | .....       | .....      | .....      | .....      |
| T996                | .....     | .....      | .....       | .....     | .....       | .....      | .....      | .....      |
| T9102               | .....     | .....      | .....       | .....     | .....       | .....      | .....      | .....      |
| K1                  | .....     | .....      | .....       | .....     | .....       | .....      | .....      | .....      |
| Dd2                 | .....     | .....      | .....       | .....     | .....       | .....      | .....      | .....      |
| D10                 | .....     | .....      | .....       | .....     | .....       | .....      | .....      | .....      |
| FCC2                | .....     | .....      | .....       | .....     | .....       | .....      | .....      | .....      |
| HB3                 | .....     | .....      | .....       | .....     | .....       | .....      | .....      | .....      |
| 7G8                 | .....     | .....      | .....       | .....     | .....       | .....      | .....      | .....      |
| <i>P.reichenowi</i> | .....     | .....      | .....G..... | .....     | .....G..... | .....      | .....      | .....      |

|                     | 330       | 340         | 350        | 360         | 370       | 380         | 390       | 400        |
|---------------------|-----------|-------------|------------|-------------|-----------|-------------|-----------|------------|
| PF14_0102           | TGCTGCAAT | CTTGAAGAAG  | ATGATCAAAT | AGATGATATG  | GAATTAAAG | CTTCTCCTTC  | AGTTGTTAA | ACATCTACTC |
| 3D7                 | .....     | .....       | .....      | .....       | .....     | .....       | .....     | .....      |
| RO33                | .....     | .....       | .....      | .....       | .....     | .....       | .....     | .....      |
| Palo Alto           | .....     | .....       | .....      | .....       | .....     | .....       | .....     | .....      |
| FCR3                | .....     | .....       | .....      | .....       | .....     | .....       | .....     | .....      |
| Wellcome            | .....     | .....       | .....      | .....       | .....     | .....       | .....     | .....      |
| D6                  | .....     | .....       | .....      | .....       | .....     | .....       | .....     | .....      |
| T996                | .....     | .....       | .....      | .....       | .....     | .....       | .....     | .....      |
| T9102               | .....     | .....       | .....      | .....       | .....     | .....       | .....     | .....      |
| K1                  | .....     | .....       | .....      | .....       | .....     | .....       | .....     | .....      |
| Dd2                 | .....     | .....       | .....      | .....       | .....     | .....       | .....     | .....      |
| D10                 | .....     | .....       | .....      | .....       | .....     | .....       | .....     | .....      |
| FCC2                | .....     | .....       | .....      | .....       | .....     | .....       | .....     | .....      |
| HB3                 | .....     | .....       | .....      | .....       | .....     | .....       | .....     | .....      |
| 7G8                 | .....     | .....       | .....      | .....       | .....     | .....       | .....     | .....      |
| <i>P.reichenowi</i> | .....     | .....G..... | .....      | .....T..... | .....     | .....C..... | .....     | .....      |

|                     | 410         | 420         | 430         | 440        | 450         | 460         | 470        | 480         |
|---------------------|-------------|-------------|-------------|------------|-------------|-------------|------------|-------------|
| PF14_0102           | CATCAGGTAC  | ACAGACATCT  | GGTTTAAAT   | CATCTAGTCC | ATCTAGTACA  | AAGTCATCAA  | GTCCATCAAA | TGTAAATCA   |
| 3D7                 | .....       | .....       | .....       | .....      | .....       | .....       | .....      | .....       |
| RO33                | .....       | .....       | .....       | .....      | .....       | .....       | .....      | .....       |
| Palo Alto           | .....       | .....       | .....C..... | .....      | .....       | .....       | .....      | .....       |
| FCR3                | .....       | .....       | .....       | .....      | .....       | .....       | .....      | .....       |
| Wellcome            | .....       | .....       | .....       | .....      | .....       | .....       | .....      | .....       |
| D6                  | .....       | .....       | .....       | .....      | .....T..... | .....       | .....      | .....       |
| T996                | .....       | .....       | .....C..... | .....      | .....       | .....       | .....      | .....       |
| T9102               | .....       | .....       | .....       | .....      | .....T..... | .....       | .....      | .....       |
| K1                  | .....       | .....       | .....       | .....      | .....       | .....       | .....      | .....       |
| Dd2                 | .....       | .....       | .....       | .....      | .....T..... | .....       | .....      | .....       |
| D10                 | .....       | .....       | .....       | .....      | .....       | .....       | .....      | .....       |
| FCC2                | .....       | .....       | .....       | .....      | .....       | .....       | .....      | .....       |
| HB3                 | .....       | .....       | .....C..... | .....      | .....       | .....       | .....      | .....       |
| 7G8                 | .....       | .....       | .....C..... | .....      | .....       | .....       | .....      | .....       |
| <i>P.reichenowi</i> | .....A..... | .....T..... | .....C..... | .....      | .....       | .....A..... | .....      | .....A..... |

|                     | 490        | 500        | 510        | 520        | 530        | 540        | 550        | 560        |
|---------------------|------------|------------|------------|------------|------------|------------|------------|------------|
| PF14_0102           | GCTAGTCCAC | ATGGTGAATC | TAATTCCTCT | GAAGAAAGTA | CTACTAAATC | CTCAAAGAGA | AGTGCTTCGG | TTGCAGGTAT |
| 3D7                 | .....      | .....      | .....      | .....      | .....      | .....      | .....      | .....      |
| RO33                | .....      | .....      | .....      | .....      | .....      | .....      | .....      | .....      |
| Palo Alto           | .....      | .....      | .....      | .....      | .....      | .....      | .....      | .....      |
| FCR3                | .....      | .....      | .....      | .....      | .....      | .....      | .....      | .....      |
| Wellcome            | .....      | .....      | .....      | .....      | .....      | .....      | .....      | .....      |
| D6                  | .....      | .....      | .....      | .....      | .....      | .....      | .....      | .....      |
| T996                | .....      | .....      | .....      | .....      | .....      | .....      | .....      | .....      |
| T9102               | .....      | .....      | .....      | .....      | .....      | .....      | .....      | .....      |
| K1                  | .....      | .....      | .....      | .....      | .....      | .....      | .....      | .....      |
| Dd2                 | .....      | .....      | .....      | .....      | .....      | .....      | .....      | .....      |
| D10                 | .....      | .....      | .....      | .....      | .....      | .....      | .....      | .....      |
| FCC2                | .....      | .....      | .....      | .....      | .....      | .....      | .....      | .....      |
| HB3                 | .....      | .....      | .....      | .....      | .....      | .....      | .....      | .....      |
| 7G8                 | .....      | .....      | .....      | .....      | .....      | .....      | .....      | .....      |
| <i>P.reichenowi</i> | .....      | .....      | .....      | .....      | T.....     | .....      | A.....     | T.....     |

|                     | 570        | 580        | 590        | 600        | 610        | 620        | 630        | 640        |
|---------------------|------------|------------|------------|------------|------------|------------|------------|------------|
| PF14_0102           | TGTAGGTGCC | GACGAAGAAG | CACCTCCTGC | ACCAAAAAAC | ACCCTCACTC | CATTAGAAGA | ATTATATCCT | ACTAATGTTA |
| 3D7                 | .....      | .....      | .....      | .....      | .....      | .....      | .....      | .....      |
| RO33                | .....      | .....      | .....      | .....      | .....      | .....      | .....      | .....      |
| Palo Alto           | .....      | .....      | .....      | .....      | .....      | .....      | .....      | .....      |
| FCR3                | .....      | .....      | .....      | .....      | .....      | .....      | .....      | .....      |
| Wellcome            | .....      | .....      | .....      | .....      | .....      | .....      | .....      | .....      |
| D6                  | .....      | .....      | .....      | .....      | .....      | .....      | .....      | .....      |
| T996                | .....      | .....      | .....      | .....      | .....      | .....      | .....      | .....      |
| T9102               | .....      | .....      | .....      | .....      | .....      | .....      | .....      | .....      |
| K1                  | .....      | .....      | .....      | .....      | .....      | .....      | .....      | .....      |
| Dd2                 | .....      | .....      | .....      | .....      | .....      | .....      | .....      | .....      |
| D10                 | .....      | .....      | .....      | .....      | .....      | .....      | .....      | .....      |
| FCC2                | .....      | .....      | .....      | .....      | .....      | .....      | .....      | .....      |
| HB3                 | .....      | .....      | .....      | .....      | .....      | .....      | .....      | .....      |
| 7G8                 | .....      | .....      | .....      | .....      | .....      | .....      | .....      | .....      |
| <i>P.reichenowi</i> | .....      | T.....     | .....      | G.....     | .....      | C.....     | .....      | .....      |

|                     | 650        | 660        | 670        | 680        | 690        | 700        | 710        | 720        |
|---------------------|------------|------------|------------|------------|------------|------------|------------|------------|
| PF14_0102           | ATTTATTTAA | CTATAAATAT | TCATTAAACA | ATATGGAAGA | AAATATCAAT | ATACTTAAAA | ACGAAGGAGA | TTTAGTTGCA |
| 3D7                 | .....      | .....      | .....      | .....      | .....      | .....      | .....      | .....      |
| RO33                | .....      | .....      | .....      | .....      | .....      | .....      | .....      | .....      |
| Palo Alto           | .....      | .....      | .....      | .....      | .....      | .....      | .....      | .....      |
| FCR3                | .....      | .....      | .....      | .....      | .....      | .....      | .....      | .....      |
| Wellcome            | .....      | .....      | .....      | .....      | .....      | .....      | .....      | .....      |
| D6                  | .....      | .....      | .....      | .....      | .....      | .....      | .....      | .....      |
| T996                | .....      | .....      | .....      | .....      | .....      | .....      | .....      | .....      |
| T9102               | .....      | .....      | .....      | .....      | .....      | .....      | .....      | .....      |
| K1                  | .....      | .....      | .....      | .....      | .....      | .....      | .....      | .....      |
| Dd2                 | .....      | .....      | .....      | .....      | .....      | .....      | .....      | .....      |
| D10                 | .....      | .....      | .....      | .....      | .....      | .....      | .....      | .....      |
| FCC2                | .....      | .....      | .....      | .....      | .....      | .....      | .....      | .....      |
| HB3                 | .....      | .....      | .....      | .....      | .....      | .....      | .....      | .....      |
| 7G8                 | .....      | .....      | .....      | .....      | .....      | .....      | .....      | .....      |
| <i>P.reichenowi</i> | .....      | .....      | .....      | .....      | .....      | .....      | C.....     | A.....     |

|                     | 730        | 740        | 750        | 760       | 770        | 780       | 790       | 800        |
|---------------------|------------|------------|------------|-----------|------------|-----------|-----------|------------|
| PF14_0102           | CAAAAAGAAG | AATTTGAATA | TGATGAAAAT | ATGGAAAAG | CTAAACAAGA | CAAAAAAAA | GCCTTGAGA | AAATAGGAAA |
| 3D7                 | .....      | .....      | .....      | .....     | .....      | .....     | .....     | .....      |
| RO33                | .....      | .....      | .....      | .....     | .....      | .....     | .....     | .....      |
| Palo Alto           | .....      | .....      | .....      | .....     | .....      | .....     | .....     | .....      |
| FCR3                | .....      | .....      | .....      | .....     | .....      | .....     | .....     | .....      |
| Wellcome            | .....      | .....      | .....      | .....     | .....      | .....     | .....     | .....      |
| D6                  | .....      | .....      | .....      | .....     | .....      | .....     | .....     | .....      |
| T996                | .....      | .....      | .....      | .....     | .....      | .....     | .....     | .....      |
| T9102               | .....      | .....      | .....      | .....     | .....      | .....     | .....     | .....      |
| K1                  | .....      | .....      | .....      | .....     | .....      | .....     | .....     | .....      |
| Dd2                 | .....      | .....      | .....      | .....     | .....      | .....     | .....     | .....      |
| D10                 | .....      | .....      | .....      | .....     | .....      | .....     | .....     | .....      |
| FCC2                | .....      | .....      | .....      | .....     | .....      | .....     | .....     | .....      |
| HB3                 | .....      | .....      | .....      | .....     | .....      | .....     | .....     | .....      |
| 7G8                 | .....      | .....      | .....      | .....     | .....      | .....     | .....     | .....      |
| <i>P.reichenowi</i> | .....      | T.....     | .....      | .....     | G.....     | G.....    | C.....    | .....      |

|                     | 810         | 820        | 830        | 840        | 850        | 860        | 870        | 880        |
|---------------------|-------------|------------|------------|------------|------------|------------|------------|------------|
| PF14_0102           | AGAAATCAGAC | GAAGAACCTT | TTATGTTTTT | AGAAAATAAA | TTTCTTGAAA | ATCAAGTAAA | AGAAAGAAAT | GTTGCTGGAT |
| 3D7                 | .....       | .....      | .....      | .....      | .....      | .....      | .....      | .....      |
| RO33                | .....       | .....      | .....      | .....      | .....      | .....      | .....      | .....      |
| Palo Alto           | .....       | .....      | .....      | .....      | .....      | .....      | .....      | .....      |
| FCR3                | .....       | .C.....    | .....      | .....      | .....      | .....      | .....      | .....      |
| Wellcome            | .....       | .C.....    | .....      | .....      | .....      | .....      | .....      | .....      |
| D6                  | .C.....     | .....      | .....      | .....      | .....      | .....      | .....      | .....      |
| T996                | .....       | .....      | .....      | .....      | .....      | .....      | .....      | .....      |
| T9102               | .C.....     | .....      | .....      | .....      | .....      | .....      | .....      | .....      |
| K1                  | .C.....     | .....      | .....      | .....      | .....      | .....      | .....      | .....      |
| Dd2                 | .C.....     | .....      | .....      | .....      | .....      | .....      | .....      | .....      |
| D10                 | .....       | .C.....    | .....      | .....      | .....      | .....      | .....      | .....      |
| FCC2                | .C.....     | .....      | .....      | .....      | .....      | .....      | .....      | .....      |
| HB3                 | .....       | .....      | .....      | .....      | .....      | .....      | .....      | .....      |
| 7G8                 | .....       | .....      | .....      | .....      | .....      | .....      | .....      | .....      |
| <i>P.reichenowi</i> | .A.....     | .....      | .A..       | .TG.....   | .....      | .....      | .....      | .....      |

|                     | 890       | 900        | 910        | 920       | 930        | 940        | 950        | 960        |
|---------------------|-----------|------------|------------|-----------|------------|------------|------------|------------|
| PF14_0102           | CCTTTCTCG | ATTTTTCAGT | AAATTAAATC | CTTTAAGAA | AGATGAAGTA | ATAGAAAAAA | CTGAAGTATC | AAAGAAAACA |
| 3D7                 | .....     | .....      | .....      | .....     | .....      | .....      | .....      | .....      |
| RO33                | .....     | .....      | .....      | .....     | .....      | .....      | .....      | .....      |
| Palo Alto           | .....     | .....      | .....      | .....     | .....      | .....      | .....      | .....      |
| FCR3                | .....     | .....      | .....      | .....     | .....      | .....      | .....      | .....      |
| Wellcome            | .....     | .....      | .....      | .....     | .....      | .....      | .....      | .....      |
| D6                  | .....     | .....      | .....      | .....     | .....      | .....      | .....      | .....      |
| T996                | .....     | .....      | .....      | .....     | .....      | .....      | .....      | .....      |
| T9102               | .....     | .....      | .....      | .....     | .....      | .....      | .....      | .....      |
| K1                  | .....     | .....      | .....      | .....     | .....      | .....      | .....      | .....      |
| Dd2                 | .....     | .....      | .....      | .....     | .....      | .....      | .....      | .....      |
| D10                 | .....     | .....      | .....      | .....     | .....      | .....      | .....      | .....      |
| FCC2                | .....     | .....      | .....      | .....     | .....      | .....      | .....      | .....      |
| HB3                 | .....     | .....      | .....      | .....     | .....      | .....      | .....      | .....      |
| 7G8                 | .....     | .....      | .....      | .....     | .....      | .....      | .....      | .....      |
| <i>P.reichenowi</i> | .....     | .....      | .....      | .C.....   | .....      | .....      | .....      | .....      |

|                     | 970        | 980       | 990        | 1000       | 1010       | 1020       | 1030       | 1040       |
|---------------------|------------|-----------|------------|------------|------------|------------|------------|------------|
| PF14_0102           | TTTTCAGGTA | TAGGTTTAA | TCTTACTGAG | AAAGAAGCTA | AAGTATTAGG | TGTAGGTGTA | ACCTATCAAG | AATATCCAGA |
| 3D7                 | .....      | .....     | .....      | .....      | .....      | .....      | .....      | .....      |
| RO33                | .....      | .....     | .....      | .....      | .....      | .....      | .....      | .....      |
| Palo Alto           | .....      | .....     | .T.C.....  | .....      | .....      | .....      | .....      | .....      |
| FCR3                | .....      | .....     | .C.....    | .....      | .....      | .C.....    | .....      | .....      |
| Wellcome            | .....      | .....     | .C.....    | .....      | .....      | .C.....    | .....      | .....      |
| D6                  | .....      | .....     | .C.....    | .....      | .....      | .C.....    | .....      | .....      |
| T996                | .....      | .....     | .A.....    | .....      | .....      | .....      | .....      | .....      |
| T9102               | .....      | .....     | .C.....    | .....      | .....      | .....      | .....      | .....      |
| K1                  | .....      | .....     | .C.....    | .....      | .....      | .C.....    | .....      | .....      |
| Dd2                 | .....      | .....     | .C.....    | .....      | .....      | .....      | .....      | .....      |
| D10                 | .....      | .....     | .C.....    | .....      | .....      | .C.....    | .....      | .....      |
| FCC2                | .....      | .....     | .C.....    | .....      | .....      | .....      | .....      | .....      |
| HB3                 | .....      | .....     | .A.....    | .....      | .....      | .....      | .....      | .....      |
| 7G8                 | .....      | .....     | .C.....    | .....      | .....      | .....      | .....      | .....      |
| <i>P.reichenowi</i> | .A.....    | .G..      | .A..C..... | .....      | .A.....    | .....      | .C.....    | .....      |

|                     | 1050       | 1060       | 1070       | 1080       | 1090       | 1100       | 1110       | 1120       |
|---------------------|------------|------------|------------|------------|------------|------------|------------|------------|
| PF14_0102           | AACCATGTTA | TATAACTGTC | CAAACAATTC | TAATTTGTTT | GATACTATAG | AATCATTACA | AGGAAGAGTA | ATTGATATTA |
| 3D7                 | .....      | .....      | .....      | .....      | .....      | .....      | .....      | .....      |
| RO33                | .....      | .....      | .....      | .....      | .....      | .....      | .....      | .....      |
| Palo Alto           | .....      | .....      | .....      | .....      | .....      | .....      | .A.....    | .....      |
| FCR3                | .....      | .....      | .....      | .....      | .....      | .....      | .A.....    | .....      |
| Wellcome            | .....      | .....      | .....      | .....      | .....      | .....      | .A.....    | .....      |
| D6                  | .....      | .....      | .....      | .....      | .....      | .....      | .A.....    | .....      |
| T996                | .....      | .....      | .....      | .....      | .....      | .....      | .A.....    | .....      |
| T9102               | .....      | .....      | .....      | .....      | .....      | .....      | .A.....    | .....      |
| K1                  | .....      | .....      | .....      | .....      | .....      | .....      | .A.....    | .....      |
| Dd2                 | .....      | .....      | .....      | .....      | .....      | .....      | .A.....    | .....      |
| D10                 | .....      | .....      | .....      | .....      | .....      | .....      | .A.....    | .....      |
| FCC2                | .....      | .....      | .....      | .....      | .....      | .....      | .A.....    | .....      |
| HB3                 | .....      | .....      | .....      | .....      | .....      | .....      | .A.....    | .....      |
| 7G8                 | .....      | .....      | .....      | .....      | .....      | .....      | .A.....    | .....      |
| <i>P.reichenowi</i> | .....      | .....      | .C.....    | .....      | .A GC..... | .....      | .T.....    | .....      |







|                     | 1770       | 1780       | 1790       | 1800       | 1810       | 1820       | 1830       | 1840       |
|---------------------|------------|------------|------------|------------|------------|------------|------------|------------|
| PF14_0102           | ATATCTTGAA | CATGATAAAA | GTCAAATGTA | TACAGAATTA | CATATTTATA | ACAAAATAGT | CGACTCTGTT | CGTTATTATA |
| 3D7                 | .....      | .....      | .....      | .....      | .....      | .....      | .....      | .....      |
| RO33                | .....      | .....      | .....      | .....      | .....      | .....      | .....      | .....      |
| Palo Alto           | .....      | .....      | .....      | .....      | .....      | .....      | .....      | .....      |
| FCR3                | .....      | .....      | .....      | .....      | .....      | .....      | .....      | .....      |
| Wellcome            | .....      | .....      | .....      | .....      | .....      | .....      | .....      | .....      |
| D6                  | .....      | .....      | .....      | .....      | .....      | .....      | .....      | .....      |
| T996                | .....      | .....      | .....      | .....      | .....      | .....      | .....      | .....      |
| T9102               | .....      | .....      | .....      | .....      | .....      | .....      | .....      | .....      |
| K1                  | .....      | .....      | .....      | .....      | .....      | .....      | .....      | .....      |
| Dd2                 | .....      | .....      | .....      | .....      | .....      | .....      | .....      | .....      |
| D10                 | .....      | .....      | .....      | .....      | .....      | .....      | .....      | .....      |
| FCC2                | .....      | .....      | .....      | .....      | .....      | .....      | .....      | .....      |
| HB3                 | .....      | .....      | .....      | .....      | .....      | .....      | .....      | .....      |
| 7G8                 | .....      | .....      | .....      | .....      | .....      | .....      | .....      | .....      |
| <i>P.reichenowi</i> | A.....     | A.....     | C.....     | G.....     | .....      | .....      | .....      | .....      |

|                     | 1850       | 1860       | 1870       | 1880       | 1890       | 1900       | 1910     | 1920      |
|---------------------|------------|------------|------------|------------|------------|------------|----------|-----------|
| PF14_0102           | GTTCATGCTT | TAAAAACGTT | ATTGTTTATA | ATGCTATCAT | TTCTGGTATA | CATGAAAAAA | TAAACATT | CTTAAATTA |
| 3D7                 | .....      | .....      | .....      | .....      | .....      | .....      | .....    | .....     |
| RO33                | .....      | .....      | .....      | .....      | .....      | .....      | .....    | .....     |
| Palo Alto           | .....      | .....      | .....      | .....      | .....      | .....      | .....    | .....     |
| FCR3                | .....      | .....      | .....      | .....      | .....      | .....      | .....    | .....     |
| Wellcome            | .....      | .....      | .....      | .....      | .....      | .....      | .....    | .....     |
| D6                  | .....      | .....      | .....      | .....      | .....      | .....      | .....    | .....     |
| T996                | .....      | .....      | .....      | .....      | .....      | .....      | .....    | .....     |
| T9102               | .....      | .....      | .....      | .....      | .....      | .....      | .....    | .....     |
| K1                  | .....      | .....      | .....      | .....      | .....      | .....      | .....    | .....     |
| Dd2                 | .....      | .....      | .....      | .....      | .....      | .....      | .....    | .....     |
| D10                 | .....      | .....      | .....      | .....      | .....      | .....      | .....    | .....     |
| FCC2                | .....      | .....      | .....      | .....      | .....      | .....      | .....    | .....     |
| HB3                 | .....      | .....      | .....      | .....      | .....      | .....      | .....    | .....     |
| 7G8                 | .....      | .....      | .....      | .....      | .....      | .....      | .....    | .....     |
| <i>P.reichenowi</i> | .....      | .....      | .....      | G.....     | .....      | .....      | .....    | .....     |

|                     | 1930       | 1940       | 1950       | 1960       | 1970      | 1980       | 1990       | 2000       |
|---------------------|------------|------------|------------|------------|-----------|------------|------------|------------|
| PF14_0102           | GTACCAAGAC | ACAACCTTCT | TTTGGATTAT | CACCTTAATT | CAATTTTGA | AAAAGAAATT | AAACCAGCCA | AAAAATATAG |
| 3D7                 | .....      | .....      | .....      | .....      | .....     | .....      | .....      | .....      |
| RO33                | .....      | .....      | .....      | .....      | .....     | .....      | .....      | .....      |
| Palo Alto           | .....      | .....      | .....      | .....      | .....     | .....      | .....      | .....      |
| FCR3                | .....      | .....      | .....      | .....      | .....     | .....      | .....      | .....      |
| Wellcome            | .....      | .....      | .....      | .....      | .....     | .....      | .....      | .....      |
| D6                  | .....      | .....      | .....      | .....      | .....     | .....      | .....      | .....      |
| T996                | .....      | .....      | .....      | .....      | .....     | .....      | .....      | .....      |
| T9102               | .....      | .....      | .....      | .....      | .....     | .....      | .....      | .....      |
| K1                  | .....      | .....      | .....      | .....      | .....     | .....      | .....      | .....      |
| Dd2                 | .....      | .....      | .....      | .....      | .....     | .....      | .....      | .....      |
| D10                 | .....      | .....      | .....      | .....      | .....     | .....      | .....      | .....      |
| FCC2                | .....      | .....      | .....      | .....      | .....     | .....      | .....      | .....      |
| HB3                 | .....      | .....      | .....      | .....      | .....     | .....      | .....      | .....      |
| 7G8                 | .....      | .....      | .....      | .....      | .....     | .....      | .....      | .....      |
| <i>P.reichenowi</i> | .....      | A.....     | .....      | .....      | .....     | .....      | T.....     | .....      |

|                     | 2010       | 2020       | 2030       | 2040       | 2050       | 2060       | 2070       | 2080       |
|---------------------|------------|------------|------------|------------|------------|------------|------------|------------|
| PF14_0102           | TACTTCACAT | ATTTATTTTG | ATCCAACGTG | TGCATCATAT | GCTTATTATA | ATTTAGATAG | AAGAACCATG | GTTACTATTA |
| 3D7                 | .....      | .....      | .....      | .....      | .....      | .....      | .....      | .....      |
| RO33                | .....      | .....      | .....      | .....      | .....      | .....      | .....      | .....      |
| Palo Alto           | .....      | .....      | .....      | .....      | .....      | .....      | .....      | .....      |
| FCR3                | .....      | .....      | .....      | .....      | .....      | .....      | .....      | .....      |
| Wellcome            | .....      | .....      | .....      | .....      | .....      | .....      | .....      | .....      |
| D6                  | .....      | .....      | .....      | .....      | .....      | .....      | .....      | .....      |
| T996                | .....      | .....      | .....      | .....      | .....      | .....      | .....      | .....      |
| T9102               | .....      | .....      | .....      | .....      | .....      | .....      | .....      | .....      |
| K1                  | .....      | .....      | .....      | .....      | .....      | .....      | .....      | .....      |
| Dd2                 | .....      | .....      | .....      | .....      | .....      | .....      | .....      | .....      |
| D10                 | .....      | .....      | .....      | .....      | .....      | .....      | .....      | .....      |
| FCC2                | .....      | .....      | .....      | .....      | .....      | .....      | .....      | .....      |
| HB3                 | .....      | .....      | .....      | .....      | .....      | .....      | .....      | .....      |
| 7G8                 | .....      | .....      | .....      | .....      | .....      | .....      | .....      | .....      |
| <i>P.reichenowi</i> | .....      | G.....     | A.....     | .....      | .....      | C.....     | .....      | T.....     |

|                     | 2090       | 2100       | 2110        | 2120       | 2130       | 2140       | 2150       | 2160       |
|---------------------|------------|------------|-------------|------------|------------|------------|------------|------------|
| PF14_0102           | TTAATGATTA | TTTCGAAGCA | AAAAAAAAAAG | AATTAACCGT | TATAGTATCT | CGTATGAAAA | CAGATATGCT | CAGTCCTCAA |
| 3D7                 | .....      | .....      | .....       | .....      | .....      | .....      | .....      | .....      |
| RO33                | .....      | .....      | .....       | .....      | .....      | .....      | .....      | .....      |
| Palo Alto           | .....      | .....      | .....       | .....      | .....      | .....      | .....      | .....      |
| FCR3                | .....      | .....      | .....       | .....      | .....      | .....      | .....      | A.....     |
| Wellcome            | .....      | .....      | .....       | .....      | .....      | .....      | .....      | A.....     |
| D6                  | .....      | .....      | .....       | .....      | .....      | .....      | .....      | .....      |
| T996                | .....      | .....      | .....       | .....      | .....      | .....      | .....      | .....      |
| T9102               | .....      | .....      | .....       | .....      | .....      | .....      | .....      | .....      |
| K1                  | .....      | .....      | .....       | .....      | .....      | .....      | .....      | A.....     |
| Dd2                 | .....      | .....      | .....       | .....      | .....      | .....      | .....      | .....      |
| D10                 | .....      | .....      | .....       | .....      | .....      | .....      | .....      | A.....     |
| FCC2                | .....      | .....      | .....       | .....      | .....      | .....      | .....      | A.....     |
| HB3                 | .....      | .....      | .....       | .....      | .....      | .....      | .....      | .....      |
| 7G8                 | .....      | .....      | .....       | .....      | .....      | .....      | .....      | .....      |
| <i>P.reichenowi</i> | .....      | .....      | .....       | .....      | .....      | .....      | .....      | .....      |

|                     | 2170        | 2180       | 2190        | 2200       | 2210       | 2220       | 2230        | 2240       |
|---------------------|-------------|------------|-------------|------------|------------|------------|-------------|------------|
| PF14_0102           | AATGAAGAAT  | CAAAAATACC | AAATGACAAA  | AGTGCAAATT | CAAAACTAGC | TACAAGATTA | ATGAAAAAAT  | TTAAAGCTGA |
| 3D7                 | .....       | .....      | .....       | .....      | .....      | .....      | .....       | .....      |
| RO33                | .....       | .....      | .....       | .....      | .....      | .....      | .....       | .....      |
| Palo Alto           | .....       | .....      | .....       | .....      | .....      | .....      | .....       | .....      |
| FCR3                | .....       | .....      | .....       | .....      | .....      | .....      | .....       | .....      |
| Wellcome            | .....       | .....      | .....       | .....      | .....      | .....      | .....       | .....      |
| D6                  | .....       | .....      | .....       | .....      | .....      | .....      | .....       | .....      |
| T996                | .....       | .....      | .....       | .....      | .....      | .....      | .....       | .....      |
| T9102               | .....       | .....      | .....       | .....      | .....      | .....      | .....       | .....      |
| K1                  | .....       | .....      | .....       | .....      | .....      | .....      | .....       | .....      |
| Dd2                 | .....       | .....      | .....       | .....      | .....      | .....      | .....       | .....      |
| D10                 | .....       | .....      | .....       | .....      | .....      | .....      | .....       | .....      |
| FCC2                | .....       | .....      | .....       | .....      | .....      | .....      | .....       | .....      |
| HB3                 | .....       | .....      | .....       | .....      | .....      | .....      | .....       | .....      |
| 7G8                 | .....       | .....      | .....       | .....      | .....      | .....      | .....       | .....      |
| <i>P.reichenowi</i> | .....C..... | .....      | .....G..... | .....      | .....      | .....      | .....G..... | .....      |

|                     | 2250        | 2260       | 2270       | 2280        | 2290        | 2300       | 2310        | 2320       |
|---------------------|-------------|------------|------------|-------------|-------------|------------|-------------|------------|
| PF14_0102           | AATCAGAGAT  | TTCTTCAAAG | AAATGCGTAT | ACAATATGCT  | AAATTAATAA  | ACATACGTTA | CAGATCTCAC  | TTAAAGAAAA |
| 3D7                 | .....       | .....      | .....      | .....       | .....       | .....      | .....       | .....      |
| RO33                | .....       | .....      | .....      | .....       | .....       | .....      | .....       | .....      |
| Palo Alto           | .....       | .....      | .....      | .....       | .....       | .....      | .....       | .....      |
| FCR3                | .....       | .....      | .....      | .....       | .....       | .....      | .....       | .....      |
| Wellcome            | .....       | .....      | .....      | .....       | .....       | .....      | .....       | .....      |
| D6                  | .....T..... | .....      | .....      | .....       | .....       | .....      | .....       | .....      |
| T996                | .....       | .....      | .....      | .....       | .....       | .....      | .....       | .....      |
| T9102               | .....       | .....      | .....      | .....       | .....       | .....      | .....       | .....      |
| K1                  | .....       | .....      | .....      | .....       | .....       | .....      | .....       | .....      |
| Dd2                 | .....       | .....      | .....      | .....       | .....       | .....      | .....       | .....      |
| D10                 | .....       | .....      | .....      | .....       | .....       | .....      | .....       | .....      |
| FCC2                | .....       | .....      | .....      | .....       | .....       | .....      | .....       | .....      |
| HB3                 | .....       | .....      | .....      | .....       | .....       | .....      | .....       | .....      |
| 7G8                 | .....       | .....      | .....      | .....       | .....       | .....      | .....       | .....      |
| <i>P.reichenowi</i> | .....C..... | .....      | .....      | .....G..... | .....T..... | .....      | .....A..... | .....      |

|                     | 2330       | 2340                 |
|---------------------|------------|----------------------|
| PF14_0102           | ACTACTTTGC | CTTCAAGAGA TTAGATTAA |
| 3D7                 | .....      | .....                |
| RO33                | .....      | .....                |
| Palo Alto           | .....      | .....                |
| FCR3                | .....      | .....                |
| Wellcome            | .....      | .....                |
| D6                  | .....      | .....                |
| T996                | .....      | .....                |
| T9102               | .....      | .....                |
| K1                  | .....      | .....                |
| Dd2                 | .....      | .....                |
| D10                 | .....      | .....                |
| FCC2                | .....      | .....                |
| HB3                 | .....      | .....                |
| 7G8                 | .....      | .....                |
| <i>P.reichenowi</i> | .....      | .....                |



|                     | 330        | 340        | 350        | 360        | 370        | 380        | 390        | 400        |
|---------------------|------------|------------|------------|------------|------------|------------|------------|------------|
| PFE0080c            | TATGTTAAGT | ACAGATGATT | ATCAATCATT | TTTTAAGAAT | AAATTCAAAG | ATATTAATCC | ATTGTTTATT | AATGATTTTA |
| 3D7                 | .....      | .....      | .....      | .....      | .....      | .....      | .....      | .....      |
| RO33                | .....      | .....      | .....      | .....      | .....      | .....      | .....      | .....      |
| Palo Alto           | .....      | .....      | .....      | .....      | .....      | .....      | .....      | .....      |
| FCR3                | .....      | .....      | .....      | .....      | .....      | .....      | .....      | .....      |
| Wellcome            | .....      | .....      | .....      | .....      | .....      | .....      | .....      | .....      |
| D6                  | .....      | .....      | .....      | .....      | .....      | .....      | .....      | .....      |
| T996                | .....      | .....      | .....      | .....      | .....      | .....      | .....      | .....      |
| T9102               | .....      | .....      | .....      | .....      | .....      | .....      | .....      | .....      |
| K1                  | .....      | .....      | .....      | .....      | .....      | .....      | .....      | .....      |
| Dd2                 | .....      | .....      | .....      | .....      | .....      | .....      | .....      | .....      |
| D10                 | .....      | .....      | .....      | .....      | .....      | .....      | .....      | .....      |
| FCC2                | .....      | .....      | .....      | .....      | .....      | .....      | .....      | .....      |
| HB3                 | .....      | .....      | .....      | .....      | .....      | .....      | .....      | .....      |
| 7G8                 | .....      | .....      | .....      | .....      | .....      | .....      | .....      | .....      |
| <i>P.reichenowi</i> | .....      | .....      | .....      | .....      | .....      | .....      | .....      | .....      |

|                     | 410       | 420        | 430       | 440        | 450        | 460        | 470        | 480       |
|---------------------|-----------|------------|-----------|------------|------------|------------|------------|-----------|
| PFE0080c            | TTTTAATCT | TAATGATAAG | AAATTATGG | AAAATCTGGA | TTTATATATA | ATGAAAGAAT | CTGAGAGAGA | ACATTGGTT |
| 3D7                 | .....     | .....      | .....     | .....      | .....      | .....      | .....      | .....     |
| RO33                | .....     | .....      | .....     | .....      | .....      | .....      | .....      | .....     |
| Palo Alto           | .....     | .....      | .....     | .....      | .....      | .....      | .....      | .....     |
| FCR3                | .....     | .....      | .....     | .....      | .....      | .....      | .....      | .....     |
| Wellcome            | .....     | .....      | .....     | .....      | .....      | .....      | .....      | .....     |
| D6                  | .....     | .....      | .....     | .....      | .....      | .....      | .....      | .....     |
| T996                | .....     | .....      | .....     | .....      | .....      | .....      | .....      | .....     |
| T9102               | .....     | .....      | .....     | .....      | .....      | .....      | .....      | .....     |
| K1                  | .....     | .....      | .....     | .....      | .....      | .....      | .....      | .....     |
| Dd2                 | .....     | .....      | .....     | .....      | .....      | .....      | .....      | .....     |
| D10                 | .....     | .....      | .....     | .....      | .....      | .....      | .....      | .....     |
| FCC2                | .....     | .....      | .....     | .....      | .....      | .....      | .....      | .....     |
| HB3                 | .....     | .....      | .....     | .....      | .....      | .....      | .....      | .....     |
| 7G8                 | .....     | .....      | .....     | .....      | .....      | .....      | .....      | .....     |
| <i>P.reichenowi</i> | .....     | C.....     | .....     | .....      | T.....     | .....      | .....      | .....     |

|                     | 490        | 500        | 510        | 520        | 530        | 540        | 550        | 560        |
|---------------------|------------|------------|------------|------------|------------|------------|------------|------------|
| PFE0080c            | ATAAAGAAGA | ATCCATTTTT | ACGTGTATTG | AATAAAGCAT | CAACTACTAC | ACATGCAACA | TATAAGTCTA | ATCCATACTT |
| 3D7                 | .....      | .....      | .....      | .....      | .....      | .....      | .....      | .....      |
| RO33                | .....      | .....      | .....      | .....      | .....      | .....      | .....      | .....      |
| Palo Alto           | .....      | .....      | .....      | .....      | .....      | .....      | .....      | .....      |
| FCR3                | .....      | .....      | .....      | .....      | .....      | .....      | .....      | .....      |
| Wellcome            | .....      | .....      | .....      | .....      | .....      | .....      | .....      | .....      |
| D6                  | .....      | .....      | .....      | .....      | .....      | .....      | .....      | .....      |
| T996                | .....      | .....      | .....      | .....      | .....      | .....      | .....      | .....      |
| T9102               | .....      | .....      | .....      | .....      | .....      | .....      | .....      | .....      |
| K1                  | .....      | .....      | .....      | .....      | .....      | .....      | .....      | .....      |
| Dd2                 | .....      | .....      | .....      | .....      | .....      | .....      | .....      | .....      |
| D10                 | .....      | .....      | .....      | .....      | .....      | .....      | A.....     | .....      |
| FCC2                | .....      | .....      | .....      | .....      | .....      | .....      | .....      | .....      |
| HB3                 | .....      | .....      | .....      | .....      | .....      | .....      | .....      | .....      |
| 7G8                 | .....      | .....      | .....      | .....      | .....      | .....      | .....      | .....      |
| <i>P.reichenowi</i> | .....      | C.....     | .....      | A.....     | .....      | G.....     | .....      | .....      |

|                     | 570        | 580        | 590        | 600        | 610        | 620        | 630        | 640        |
|---------------------|------------|------------|------------|------------|------------|------------|------------|------------|
| PFE0080c            | TATAGTAGGA | TCAAGAGTTC | ATACACCTTA | TAAAGATTAC | TTAGGAGATT | TTAATAAATA | TACTGAGATA | AGTGTACTTA |
| 3D7                 | .....      | .....      | .....      | .....      | .....      | .....      | .....      | .....      |
| RO33                | .....      | .....      | .....      | .....      | G.....     | .....      | .....      | .....      |
| Palo Alto           | .....      | .....      | .....      | .....      | C.T.....   | .....      | .....      | .....      |
| FCR3                | .....      | .....      | .....      | .....      | T.....     | .....      | .....      | .....      |
| Wellcome            | .....      | .....      | .....      | .....      | T.....     | .....      | .....      | .....      |
| D6                  | .....      | .....      | .....      | .....      | .....      | .....      | .....      | .....      |
| T996                | .....      | .....      | .....      | .....      | .....      | .....      | .....      | .....      |
| T9102               | .....      | .....      | .....      | .....      | T.....     | .....      | .....      | .....      |
| K1                  | .....      | .....      | .....      | .....      | T.....     | .....      | .....      | .....      |
| Dd2                 | .....      | .....      | .....      | .....      | T.....     | .....      | .....      | .....      |
| D10                 | .....      | .....      | .....      | .....      | T.....     | .....      | .....      | .....      |
| FCC2                | .....      | .....      | .....      | .....      | C.T.....   | .....      | .....      | .....      |
| HB3                 | .....      | .....      | .....      | .....      | C.T.....   | .....      | .....      | .....      |
| 7G8                 | .....      | .....      | .....      | .....      | .....      | .....      | .....      | .....      |
| <i>P.reichenowi</i> | .....      | .....      | A.....     | .....      | T.....     | .....      | T.....     | .....      |

|                     | 650         | 660        | 670        | 680        | 690         | 700        | 710        | 720        |
|---------------------|-------------|------------|------------|------------|-------------|------------|------------|------------|
| PFE0080c            | ATTATGTTTCG | TGATTACAAT | TTTTTAATTT | ATGCTGGTTC | AAGGGAAAAAT | TACTACAATT | CAGATATAGC | TGGACCAGCA |
| 3D7                 | .....       | .....      | .....      | .....      | .....       | .....      | .....      | .....      |
| RO33                | .....       | .....      | .....      | .....      | .....       | .....      | .....      | .....      |
| Palo Alto           | .....       | .....      | .....      | .....      | .....       | .....      | .....      | .....      |
| FCR3                | .....       | .....      | .....      | .....      | .....       | .....      | .....      | .....      |
| Wellcome            | .....       | .....      | .....      | .....      | .....       | .....      | .....      | .....      |
| D6                  | .....       | .....      | .....      | .....      | .....       | .....      | .....      | .....      |
| T996                | .....       | .....      | .....      | .....      | .....       | .....      | .....      | .....      |
| T9102               | .....       | .....      | .....      | .....      | .....       | .....      | .....      | .....      |
| K1                  | .....       | .....      | .....      | .....      | .....       | .....      | .....      | .....      |
| Dd2                 | .....       | .....      | .....      | .....      | .....       | .....      | .....      | .....      |
| D10                 | .....       | .....      | .....      | .....      | .....       | .....      | .....      | .....      |
| FCC2                | .....       | .....      | .....      | .....      | .....       | .....      | .....      | .....      |
| HB3                 | .....       | .....      | .....      | .....      | .....       | .....      | .....      | .....      |
| 7G8                 | .....       | .....      | .....      | .....      | .....       | .....      | .....      | .....      |
| <i>P.reichenowi</i> | ...T.....   | .....      | .....      | .....      | ..A.....    | .....      | .....      | ..A.....   |

|                     | 730        | 740        | 750        | 760        | 770        | 780        | 790        | 800        |
|---------------------|------------|------------|------------|------------|------------|------------|------------|------------|
| PFE0080c            | AGAAGTGTTA | ATAATGTAAT | TAGTAAGAAT | AAAACATTAG | GATTGAGAAA | ACGTAGTAGT | TCTCTCGCTT | TAGTAGGAAC |
| 3D7                 | .....      | .....      | .....      | .....      | .....      | .....      | .....      | .....      |
| RO33                | .....      | .....      | .....      | .....      | .....      | .....      | .....      | .....      |
| Palo Alto           | .....      | .....      | .....      | .....      | .....      | .....      | .....      | .....      |
| FCR3                | .....      | .....      | .....      | .....      | .....      | .....      | .....      | .....      |
| Wellcome            | .....      | .....      | .....      | .....      | .....      | .....      | .....      | .....      |
| D6                  | .....      | .....      | .....      | .....      | .....      | .....      | .....      | .....      |
| T996                | .....      | .....      | .....      | .....      | .....      | .....      | .....      | .....      |
| T9102               | .....      | .....      | .....      | .....      | .....      | .....      | .....      | .....      |
| K1                  | .....      | .....      | .....      | .....      | .....      | .....      | .....      | .....      |
| Dd2                 | .....      | .....      | .....      | .....      | .....      | .....      | .....      | .....      |
| D10                 | .....      | .....      | .....      | .....      | .....      | .....      | .....      | .....      |
| FCC2                | .....      | .....      | .....      | .....      | .....      | .....      | .....      | .....      |
| HB3                 | .....      | .....      | .....      | .....      | .....      | .....      | .....      | .....      |
| 7G8                 | .....      | .....      | .....      | .....      | .....      | .....      | .....      | .....      |
| <i>P.reichenowi</i> | .....      | .....      | .....      | .....      | .....      | .....      | ...T.....  | .....      |

|                     | 810        | 820        | 830        | 840        | 850        | 860        | 870        | 880        |
|---------------------|------------|------------|------------|------------|------------|------------|------------|------------|
| PFE0080c            | AAATAACAAT | GACCCTATAT | TTGCTTATTG | TGAAAAAGAT | AATAAATCAG | AATATTACGG | TACACCAGAT | GATTTAATTA |
| 3D7                 | .....      | .....      | .....      | .....      | .....      | .....      | .....      | .....      |
| RO33                | .....      | .....      | .....      | .....      | .....      | .....      | .....      | .....      |
| Palo Alto           | .....      | .....      | .....      | .....      | .....      | .....      | .....      | .....      |
| FCR3                | .....      | .....      | .....      | .....      | .....      | .....      | .....      | .....      |
| Wellcome            | .....      | .....      | .....      | .....      | .....      | .....      | .....      | .....      |
| D6                  | .....      | .....      | .....      | .....      | .....      | .....      | .....      | .....      |
| T996                | .....      | .....      | .....      | .....      | .....      | .....      | .....      | .....      |
| T9102               | .....      | .....      | .....      | .....      | .....      | .....      | .....      | .....      |
| K1                  | .....      | .....      | .....      | .....      | .....      | .....      | .....      | .....      |
| Dd2                 | .....      | .....      | .....      | .....      | .....      | .....      | .....      | .....      |
| D10                 | .....      | .....      | .....      | .....      | .....      | .....      | .....      | .....      |
| FCC2                | .....      | .....      | .....      | .....      | .....      | .....      | .....      | .....      |
| HB3                 | .....      | .....      | .....      | .....      | .....      | .....      | .....      | .....      |
| 7G8                 | .....      | .....      | .....      | .....      | .....      | .....      | .....      | .....      |
| <i>P.reichenowi</i> | .....      | .....      | .....      | .....      | .....      | .....      | .....      | .....      |

|                     | 890        | 900        | 910        | 920        | 930        | 940        | 950        | 960        |
|---------------------|------------|------------|------------|------------|------------|------------|------------|------------|
| PFE0080c            | CATCTTTCTT | TTCAATTATA | AAAACATAAA | TGTTAAATTC | TCATAAAACG | TTTTTAAGAC | AATTTGATTA | TGCTTTATTT |
| 3D7                 | .....      | .....      | .....      | .....      | .....      | .....      | .....      | .....      |
| RO33                | .....      | .....      | .....      | .....      | .....      | .....      | .....      | .....      |
| Palo Alto           | .....      | .....      | .....      | .....      | .....      | .....      | .....      | .....      |
| FCR3                | .....      | .....      | .....      | .....      | .....      | .....      | .....      | .....      |
| Wellcome            | .....      | .....      | .....      | .....      | .....      | .....      | .....      | .....      |
| D6                  | .....      | .....      | .....      | .....      | .....      | .....      | .....      | .....      |
| T996                | .....      | .....      | .....      | .....      | .....      | .....      | .....      | .....      |
| T9102               | .....      | .....      | .....      | .....      | .....      | .....      | .....      | .....      |
| K1                  | .....      | .....      | .....      | .....      | .....      | .....      | .....      | .....      |
| Dd2                 | .....      | .....      | .....      | .....      | .....      | .....      | .....      | .....      |
| D10                 | .....      | .....      | .....      | .....      | .....      | .....      | .....      | .....      |
| FCC2                | .....      | .....      | .....      | .....      | .....      | .....      | .....      | .....      |
| HB3                 | .....      | .....      | .....      | .....      | .....      | .....      | .....      | .....      |
| 7G8                 | .....      | .....      | .....      | .....      | .....      | .....      | .....      | .....      |
| <i>P.reichenowi</i> | .....      | .....      | .....      | .....      | ..A.....   | .....      | .....      | .....      |





|                     |             |            |            |            |            |            |            |            |
|---------------------|-------------|------------|------------|------------|------------|------------|------------|------------|
|                     | 330         | 340        | 350        | 360        | 370        | 380        | 390        | 400        |
| PFE0075c            | AAATGATGATT | AGAAATGAAG | AACATGAATC | ATTTTTCAAA | AATAAATTAA | GTGAAATTAA | TAATATAATA | TCTGGTGATT |
| 3D7                 | .....       | .....      | .....      | .....      | .....      | .....      | .....      | .....      |
| RO33                | .....       | .....      | .....      | .....      | .....      | .....      | .....      | .....      |
| Palo Alto           | .....       | .....      | .....      | .....      | .....      | .....      | .....      | .....      |
| FCR3                | .....       | .....      | .....      | .....      | .....      | .....      | .....      | .....      |
| Wellcome            | .....       | .....      | .....      | .....      | .....      | .....      | .....      | .....      |
| D6                  | .....       | .....      | .....      | .....      | .....      | .....      | .....      | .....      |
| T996                | .....       | .....      | .....      | .....      | .....      | .....      | .....      | .....      |
| T9102               | .....       | .....      | .....      | .....      | .....      | .....      | .....      | .....      |
| K1                  | .....       | .....      | .....      | .....      | .....      | .....      | .....      | .....      |
| Dd2                 | .....       | .....      | .....      | .....      | .....      | .....      | .....      | .....      |
| D10                 | .....       | .....      | .....      | .....      | .....      | .....      | .....      | .....      |
| FCC2                | .....       | .....      | .....      | .....      | .....      | .....      | .....      | .....      |
| HB3                 | .....       | .....      | .....      | .....      | .....      | .....      | .....      | .....      |
| 7G8                 | .....       | .....      | .....      | .....      | .....      | .....      | .....      | .....      |
| <i>P.reichenowi</i> | .....       | .....      | .....      | .....      | .C.....G   | .....      | .....      | .....      |

|                     |             |             |           |           |            |            |           |            |
|---------------------|-------------|-------------|-----------|-----------|------------|------------|-----------|------------|
|                     | 410         | 420         | 430       | 440       | 450        | 460        | 470       | 480        |
| PFE0075c            | TCCTTTC AAC | ATTAAAA CAT | GAATATTTT | TTGATAAGT | ACCATCTATT | ATAGTTAAAG | AAAAGATGC | ATCCCATATA |
| 3D7                 | .....       | .....       | .....     | .....     | .....      | .....      | .....     | .....      |
| RO33                | .....       | .....       | .....     | .....     | .....      | .....      | .....     | .....      |
| Palo Alto           | .....       | .....       | .....     | .....     | .....      | .....      | .....     | .....      |
| FCR3                | .....       | .....       | .....     | .....     | .....      | .....      | .....     | .....      |
| Wellcome            | .....       | .....       | .....     | .....     | .....      | .....      | .....     | .....      |
| D6                  | .....       | .....       | .....     | .....     | .....      | .....      | .....     | .....      |
| T996                | .....       | .....       | .....     | .....     | .....      | .....      | .....     | .....      |
| T9102               | .....       | .....       | .....     | .....     | .....      | .....      | .....     | .....      |
| K1                  | .....       | .....       | .....     | .....     | .....      | .....      | .....     | .....      |
| Dd2                 | .....       | .....       | .....     | .....     | .....      | .....      | .....     | .....      |
| D10                 | .....       | .....       | .....     | .....     | .....      | .....      | .....     | .....      |
| FCC2                | .....       | .....       | .....     | .....     | .....      | .....      | .....     | .....      |
| HB3                 | .....       | .....       | .....     | .....     | .....      | .....      | .....     | .....      |
| 7G8                 | .....       | .....       | .....     | .....     | .....      | .....      | .....     | .....      |
| <i>P.reichenowi</i> | .....       | ..G.....    | .....     | .....     | ..T.....   | .....      | .....     | ..T.....   |

|                     |            |           |            |           |           |            |           |            |
|---------------------|------------|-----------|------------|-----------|-----------|------------|-----------|------------|
|                     | 490        | 500       | 510        | 520       | 530       | 540        | 550       | 560        |
| PFE0075c            | GTAAAAAGGA | CTGATTTTT | ACAAGATATA | TTAGAAAAG | CAGATTTAA | TAACCATGCA | ATTATAAAA | ACGATCCTAC |
| 3D7                 | .....      | .....     | .....      | .....     | .....     | .....      | .....     | .....      |
| RO33                | .....      | .....     | .....      | .....     | .....     | .....      | .....     | .....      |
| Palo Alto           | .....      | .....     | .....      | .....     | .....     | .....      | .....     | .....      |
| FCR3                | .....      | .....     | .....      | .....     | .....     | .....      | .....     | .....      |
| Wellcome            | .....      | .....     | .....      | .....     | .....     | .....      | .....     | .....      |
| D6                  | .....      | .....     | .....      | .....     | .....     | .....      | .....     | .....      |
| T996                | .....      | .....     | .....      | .....     | .....     | .....      | .....     | .....      |
| T9102               | .....      | .....     | .....      | .....     | .....     | .....      | .....     | .....      |
| K1                  | .....      | .....     | .....      | .....     | .....     | .....      | .....     | .....      |
| Dd2                 | .....      | .....     | .....      | .....     | .....     | .....      | .....     | .....      |
| D10                 | .....      | .....     | .....      | .....     | .....     | .....      | .....     | .....      |
| FCC2                | .....      | .....     | .....      | .....     | .....     | .....      | .....     | .....      |
| HB3                 | .....      | .....     | .....      | .....     | .....     | .....      | .....     | .....      |
| 7G8                 | .....      | .....     | .....      | .....     | .....     | .....      | .....     | .....      |
| <i>P.reichenowi</i> | .....      | ..G.....  | .....      | .....     | ..C.....  | ..A.....   | .....     | .....      |

|                     |            |            |            |           |            |            |            |            |
|---------------------|------------|------------|------------|-----------|------------|------------|------------|------------|
|                     | 570        | 580        | 590        | 600       | 610        | 620        | 630        | 640        |
| PFE0075c            | AAAAGTATTT | ATTTTAAATG | AAATAAATTT | TTTAGAACA | TTCCAATTAG | AAGGTAAACC | ACATATACCT | GATGATCAAC |
| 3D7                 | .....      | .....      | .....      | .....     | .....      | .....      | .....      | .....      |
| RO33                | .....      | .....      | .....      | .....     | .....      | .....      | .....      | .....      |
| Palo Alto           | .....      | .....      | .....      | .....     | .....      | .....      | .....      | .....      |
| FCR3                | .....      | .....      | .....      | .....     | .....      | .....      | .....      | .....      |
| Wellcome            | .....      | .....      | .....      | .....     | .....      | .....      | .....      | .....      |
| D6                  | .....      | .....      | .....      | .....     | .....      | .....      | .....      | .....      |
| T996                | .....      | .....      | .....      | .....     | .....      | .....      | .....      | .....      |
| T9102               | .....      | .....      | .....      | .....     | .....      | .....      | .....      | .....      |
| K1                  | .....      | .....      | .....      | .....     | .....      | .....      | .....      | .....      |
| Dd2                 | .....      | .....      | .....      | .....     | .....      | .....      | .....      | .....      |
| D10                 | .....      | .....      | .....      | .....     | .....      | .....      | .....      | .....      |
| FCC2                | .....      | .....      | .....      | .....     | .....      | .....      | .....      | .....      |
| HB3                 | .....      | .....      | .....      | .....     | .....      | .....      | .....      | .....      |
| 7G8                 | .....      | .....      | .....      | .....     | .....      | .....      | .....      | .....      |
| <i>P.reichenowi</i> | .....      | .....      | .....      | ..GT..    | ..T.....   | .....      | .....      | ..A.....   |



|                     | 650        | 660        | 670        | 680        | 690        | 700        | 710        | 720        |
|---------------------|------------|------------|------------|------------|------------|------------|------------|------------|
| PFE0075c            | TTTCTTTTAT | GCGTGATTAT | GCTTTATTAA | TTTATCTTGG | TACTAAGGAA | AATTATTATA | ATTCTGATAT | AACAGAATAT |
| 3D7                 | .....      | .....      | .....      | .....      | .....      | .....      | .....      | .....      |
| RO33                | .....      | .....      | .....      | .....      | .....      | .....      | .....      | .....      |
| Palo Alto           | .....      | .....      | .....      | .....      | .....      | .....      | .....      | .....      |
| FCR3                | .....      | .....      | .....      | .....      | .....      | .....      | .....      | .....      |
| Wellcome            | .....      | .....      | .....      | .....      | .....      | .....      | .....      | .....      |
| D6                  | .....      | .....      | .....      | .....      | .....      | .....      | .....      | .....      |
| T996                | .....      | .....      | .....      | .....      | .....      | .....      | .....      | .....      |
| T9102               | .....      | .....      | .....      | .....      | .....      | .....      | .....      | .....      |
| K1                  | .....      | .....      | .....      | .....      | .....      | .....      | .....      | .....      |
| Dd2                 | .....      | .....      | .....      | .....      | .....      | .....      | .....      | .....      |
| D10                 | .....      | .....      | .....      | .....      | .....      | .....      | .....      | .....      |
| FCC2                | .....      | .....      | .....      | .....      | .....      | .....      | .....      | .....      |
| HB3                 | .....      | .....      | .....      | .....      | .....      | .....      | .....      | .....      |
| 7G8                 | .....      | .....      | .....      | .....      | .....      | .....      | .....      | .....      |
| <i>P.reichenowi</i> | .....      | .....      | A.....     | .....      | .....      | .....      | .....      | .....      |

|                     | 730        | 740         | 750        | 760        | 770        | 780        | 790        | 800        |
|---------------------|------------|-------------|------------|------------|------------|------------|------------|------------|
| PFE0075c            | GCACAAGGAA | ATTATAAATAT | TTCGAAAAAT | AGAACAAGAT | TAGGATTAAT | AAAACGTAGT | AAAACATTTT | CTTTAGATGA |
| 3D7                 | .....      | .....       | .....      | .....      | .....      | .....      | .....      | .....      |
| RO33                | .....      | .....       | .....      | .....      | .....      | .....      | .....      | .....      |
| Palo Alto           | .....      | .....       | .....      | .....      | .....      | .....      | .....      | .....      |
| FCR3                | .....      | .....       | .....      | .....      | .....      | .....      | .....      | .....      |
| Wellcome            | .....      | .....       | .....      | .....      | .....      | .....      | .....      | .....      |
| D6                  | .....      | .....       | .....      | .....      | .....      | .....      | .....      | .....      |
| T996                | .....      | .....       | .....      | .....      | .....      | .....      | .....      | .....      |
| T9102               | .....      | .....       | .....      | .....      | .....      | .....      | .....      | .....      |
| K1                  | .....      | .....       | .....      | .....      | .....      | .....      | .....      | .....      |
| Dd2                 | .....      | .....       | .....      | .....      | .....      | .....      | .....      | .....      |
| D10                 | .....      | .....       | .....      | .....      | .....      | .....      | .....      | .....      |
| FCC2                | .....      | .....       | .....      | .....      | .....      | .....      | .....      | .....      |
| HB3                 | .....      | .....       | .....      | .....      | .....      | .....      | .....      | .....      |
| 7G8                 | .....      | .....       | .....      | .....      | .....      | .....      | .....      | .....      |
| <i>P.reichenowi</i> | .....      | .....       | .....      | .....      | .....      | .....      | .....      | .....      |

|                     | 810        | 820        | 830        | 840        | 850        | 860        | 870        | 880        |
|---------------------|------------|------------|------------|------------|------------|------------|------------|------------|
| PFE0075c            | TCCCCAAAAA | AATTCCAATA | TATTTGCTTT | TTGTGAAAAA | AATGGAAAAG | AAGAATTTTT | TGGTACACCT | GATGATTTAA |
| 3D7                 | .....      | .....      | .....      | .....      | .....      | .....      | .....      | .....      |
| RO33                | .....      | .....      | .....      | .....      | .....      | .....      | .....      | .....      |
| Palo Alto           | .....      | .....      | .....      | .....      | .....      | .....      | .....      | .....      |
| FCR3                | .....      | .....      | .....      | .....      | .....      | .....      | .....      | .....      |
| Wellcome            | .....      | .....      | .....      | .....      | .....      | .....      | .....      | .....      |
| D6                  | .....      | .....      | .....      | .....      | .....      | .....      | .....      | .....      |
| T996                | .....      | .....      | .....      | .....      | .....      | .....      | .....      | .....      |
| T9102               | .....      | .....      | .....      | .....      | .....      | .....      | .....      | .....      |
| K1                  | .....      | .....      | .....      | .....      | .....      | .....      | .....      | .....      |
| Dd2                 | .....      | .....      | .....      | .....      | .....      | .....      | .....      | .....      |
| D10                 | .....      | .....      | .....      | .....      | .....      | .....      | .....      | .....      |
| FCC2                | .....      | .....      | .....      | .....      | .....      | .....      | .....      | .....      |
| HB3                 | .....      | .....      | .....      | .....      | .....      | .....      | .....      | .....      |
| 7G8                 | .....      | .....      | .....      | .....      | .....      | .....      | .....      | .....      |
| <i>P.reichenowi</i> | .....      | A.....     | .....      | C.....     | .....      | .....      | .....      | C.....     |

|                     | 890        | 900        | 910        | 920        | 930        | 940       | 950       | 960        |
|---------------------|------------|------------|------------|------------|------------|-----------|-----------|------------|
| PFE0075c            | TTTCATCATT | TTTTTCTGAT | ATGAAAGCTA | AAATGGTTAA | AGGGCATAAG | AGATTTTGA | TGGAATTGA | TTATGCTGTT |
| 3D7                 | .....      | .....      | .....      | .....      | .....      | .....     | .....     | .....      |
| RO33                | .....      | .....      | .....      | .....      | .....      | .....     | .....     | .....      |
| Palo Alto           | .....      | .....      | .....      | .....      | .....      | .....     | .....     | .....      |
| FCR3                | .....      | .....      | .....      | .....      | .....      | .....     | .....     | .....      |
| Wellcome            | .....      | .....      | .....      | .....      | .....      | .....     | .....     | .....      |
| D6                  | .....      | .....      | .....      | .....      | .....      | .....     | .....     | .....      |
| T996                | .....      | .....      | .....      | .....      | .....      | .....     | .....     | .....      |
| T9102               | .....      | .....      | .....      | .....      | .....      | .....     | .....     | .....      |
| K1                  | .....      | .....      | .....      | .....      | .....      | .....     | .....     | .....      |
| Dd2                 | .....      | .....      | .....      | .....      | .....      | .....     | .....     | .....      |
| D10                 | .....      | .....      | .....      | .....      | .....      | .....     | .....     | .....      |
| FCC2                | .....      | .....      | .....      | .....      | .....      | .....     | .....     | .....      |
| HB3                 | .....      | .....      | .....      | .....      | .....      | .....     | .....     | .....      |
| 7G8                 | .....      | .....      | .....      | .....      | .....      | .....     | .....     | .....      |
| <i>P.reichenowi</i> | .....      | .....      | .....      | .....      | .....      | A.....    | .....     | .....      |

|                     | 970                                                   | 980                                                   | 990                                                   | 1000                                                  | 1010                                                  | 1020                                                  | 1030                                                  | 1040                                                  |
|---------------------|-------------------------------------------------------|-------------------------------------------------------|-------------------------------------------------------|-------------------------------------------------------|-------------------------------------------------------|-------------------------------------------------------|-------------------------------------------------------|-------------------------------------------------------|
| PFE0075c            | ..... ..... ..... ..... ..... ..... ..... ..... ..... | ..... ..... ..... ..... ..... ..... ..... ..... ..... | ..... ..... ..... ..... ..... ..... ..... ..... ..... | ..... ..... ..... ..... ..... ..... ..... ..... ..... | ..... ..... ..... ..... ..... ..... ..... ..... ..... | ..... ..... ..... ..... ..... ..... ..... ..... ..... | ..... ..... ..... ..... ..... ..... ..... ..... ..... | ..... ..... ..... ..... ..... ..... ..... ..... ..... |
|                     | AAAAATAGAA                                            | CTTATGCTTT                                            | ACCTAAAGTT                                            | AAGGGATTTC                                            | GATTTTTAAA                                            | ACAACTTTT                                             | CAAAGAAAA                                             | ATTTAAAAA                                             |
| 3D7                 | .....                                                 | .....                                                 | .....                                                 | .....                                                 | .....                                                 | .....                                                 | .....                                                 | .....                                                 |
| RO33                | .....                                                 | .....                                                 | .....                                                 | .....                                                 | .....                                                 | .....                                                 | .....                                                 | .....                                                 |
| Palo Alto           | .....                                                 | .....                                                 | .....                                                 | .....                                                 | .....                                                 | .....                                                 | .....                                                 | .....                                                 |
| FCR3                | .....                                                 | .....                                                 | .....                                                 | .....                                                 | .....                                                 | .....                                                 | .....                                                 | .....                                                 |
| Wellcome            | .....                                                 | .....                                                 | .....                                                 | .....                                                 | .....                                                 | .....                                                 | .....                                                 | .....                                                 |
| D6                  | .....                                                 | .....                                                 | .....                                                 | .....                                                 | .....                                                 | .....                                                 | .....                                                 | .....                                                 |
| T996                | .....                                                 | .....                                                 | .....                                                 | .....                                                 | .....                                                 | .....                                                 | .....                                                 | .....                                                 |
| T9102               | .....                                                 | .....                                                 | .....                                                 | .....                                                 | .....                                                 | .....                                                 | .....                                                 | .....                                                 |
| K1                  | .....                                                 | .....                                                 | .....                                                 | .....                                                 | .....                                                 | .....                                                 | .....                                                 | .....                                                 |
| Dd2                 | .....                                                 | .....                                                 | .....                                                 | .....                                                 | .....                                                 | .....                                                 | .....                                                 | .....                                                 |
| D10                 | .....                                                 | .....                                                 | .....                                                 | .....                                                 | .....                                                 | .....                                                 | .....                                                 | .....                                                 |
| FCC2                | .....                                                 | .....                                                 | .....                                                 | .....                                                 | .....                                                 | .....                                                 | .....                                                 | .....                                                 |
| HB3                 | .....                                                 | .....                                                 | .....                                                 | .....                                                 | .....                                                 | .....                                                 | .....                                                 | .....                                                 |
| 7G8                 | .....                                                 | .....                                                 | .....                                                 | .....                                                 | .....                                                 | .....                                                 | .....                                                 | .....                                                 |
| <i>P.reichenowi</i> | .....                                                 | .....                                                 | .....                                                 | .....                                                 | .....                                                 | ..C.....                                              | .....                                                 | .....T.....                                           |

|                     | 1050                                                  | 1060                                                  | 1070                                                  | 1080                                                  | 1090                                                  | 1100                                                  | 1110                                                  | 1120                                                  |
|---------------------|-------------------------------------------------------|-------------------------------------------------------|-------------------------------------------------------|-------------------------------------------------------|-------------------------------------------------------|-------------------------------------------------------|-------------------------------------------------------|-------------------------------------------------------|
| PFE0075c            | ..... ..... ..... ..... ..... ..... ..... ..... ..... | ..... ..... ..... ..... ..... ..... ..... ..... ..... | ..... ..... ..... ..... ..... ..... ..... ..... ..... | ..... ..... ..... ..... ..... ..... ..... ..... ..... | ..... ..... ..... ..... ..... ..... ..... ..... ..... | ..... ..... ..... ..... ..... ..... ..... ..... ..... | ..... ..... ..... ..... ..... ..... ..... ..... ..... | ..... ..... ..... ..... ..... ..... ..... ..... ..... |
|                     | TTTCGTAGGA                                            | ATGTATATAA                                            | ACCTTCTGTC                                            | TACTGAAATT                                            | GATTTCCTAG                                            | CAGAAGATT                                             | TGTAGAAATG                                            | TTCGATACTA                                            |
| 3D7                 | .....                                                 | .....                                                 | .....                                                 | .....                                                 | .....                                                 | .....                                                 | .....                                                 | .....                                                 |
| RO33                | .....                                                 | .....                                                 | .....                                                 | .....                                                 | .....                                                 | .....                                                 | .....                                                 | .....                                                 |
| Palo Alto           | .....                                                 | .....                                                 | .....                                                 | .....                                                 | .....                                                 | .....                                                 | .....                                                 | .....                                                 |
| FCR3                | .....                                                 | .....                                                 | .....                                                 | .....                                                 | .....                                                 | .....                                                 | .....                                                 | .....                                                 |
| Wellcome            | .....                                                 | .....                                                 | .....                                                 | .....                                                 | .....                                                 | .....                                                 | .....                                                 | .....                                                 |
| D6                  | .....                                                 | .....                                                 | .....                                                 | .....                                                 | .....                                                 | .....                                                 | .....                                                 | .....                                                 |
| T996                | .....                                                 | .....                                                 | .....                                                 | .....                                                 | .....                                                 | .....                                                 | .....                                                 | .....                                                 |
| T9102               | .....                                                 | .....                                                 | .....                                                 | .....                                                 | .....                                                 | .....                                                 | .....                                                 | .....                                                 |
| K1                  | .....                                                 | .....                                                 | .....                                                 | .....                                                 | .....                                                 | .....                                                 | .....                                                 | .....                                                 |
| Dd2                 | .....                                                 | .....                                                 | .....                                                 | .....                                                 | .....                                                 | .....                                                 | .....                                                 | .....                                                 |
| D10                 | .....                                                 | .....                                                 | .....                                                 | .....                                                 | .....                                                 | .....                                                 | .....                                                 | .....                                                 |
| FCC2                | .....                                                 | .....                                                 | .....                                                 | .....                                                 | .....                                                 | .....                                                 | .....                                                 | .....                                                 |
| HB3                 | .....                                                 | .....                                                 | .....                                                 | .....                                                 | .....                                                 | .....                                                 | .....                                                 | .....                                                 |
| 7G8                 | .....                                                 | .....                                                 | .....                                                 | .....                                                 | .....                                                 | .....                                                 | .....                                                 | .....                                                 |
| <i>P.reichenowi</i> | .....                                                 | .....                                                 | .....T.....                                           | .....                                                 | .....                                                 | .....                                                 | .....                                                 | .....T.....                                           |

|                     | 1130                                                  | 1140                                                  | 1150                                                  | 1160                                                  | 1170                                                  | 1180                                                  | 1190                                                  | 1200                                                  |
|---------------------|-------------------------------------------------------|-------------------------------------------------------|-------------------------------------------------------|-------------------------------------------------------|-------------------------------------------------------|-------------------------------------------------------|-------------------------------------------------------|-------------------------------------------------------|
| PFE0075c            | ..... ..... ..... ..... ..... ..... ..... ..... ..... | ..... ..... ..... ..... ..... ..... ..... ..... ..... | ..... ..... ..... ..... ..... ..... ..... ..... ..... | ..... ..... ..... ..... ..... ..... ..... ..... ..... | ..... ..... ..... ..... ..... ..... ..... ..... ..... | ..... ..... ..... ..... ..... ..... ..... ..... ..... | ..... ..... ..... ..... ..... ..... ..... ..... ..... | ..... ..... ..... ..... ..... ..... ..... ..... ..... |
|                     | CTATGAATTG                                            | TTATGGACGC                                            | CAACATGCCG                                            | CTCGTGCAGC                                            | AGATCATTAT                                            | ATGGATATGA                                            | AACTATCGAA                                            | CATATTCAAA TAA                                        |
| 3D7                 | .....                                                 | .....                                                 | .....                                                 | .....                                                 | .....                                                 | .....                                                 | .....                                                 | .....                                                 |
| RO33                | .....                                                 | .....                                                 | .....                                                 | .....                                                 | .....                                                 | .....                                                 | .....                                                 | .....                                                 |
| Palo Alto           | .....                                                 | .....                                                 | .....                                                 | .....                                                 | .....                                                 | .....                                                 | .....                                                 | .....                                                 |
| FCR3                | .....                                                 | .....                                                 | .....                                                 | .....                                                 | .....                                                 | .....                                                 | .....                                                 | .....                                                 |
| Wellcome            | .....                                                 | .....                                                 | .....                                                 | .....                                                 | .....                                                 | .....                                                 | .....                                                 | .....                                                 |
| D6                  | .....                                                 | .....                                                 | .....                                                 | .....                                                 | .....                                                 | .....                                                 | .....                                                 | .....                                                 |
| T996                | .....                                                 | .....                                                 | .....                                                 | .....                                                 | .....                                                 | .....                                                 | .....                                                 | .....                                                 |
| T9102               | .....                                                 | .....                                                 | .....                                                 | .....                                                 | .....                                                 | .....                                                 | .....                                                 | .....                                                 |
| K1                  | .....                                                 | .....                                                 | .....                                                 | .....                                                 | .....                                                 | .....                                                 | .....                                                 | .....                                                 |
| Dd2                 | .....                                                 | .....                                                 | .....                                                 | .....                                                 | .....                                                 | .....                                                 | .....                                                 | .....                                                 |
| D10                 | .....                                                 | .....                                                 | .....                                                 | .....                                                 | .....                                                 | .....                                                 | .....                                                 | .....                                                 |
| FCC2                | .....                                                 | .....                                                 | .....                                                 | .....                                                 | .....                                                 | .....                                                 | .....                                                 | .....                                                 |
| HB3                 | .....                                                 | .....                                                 | .....                                                 | .....                                                 | .....                                                 | .....                                                 | .....                                                 | .....                                                 |
| 7G8                 | .....                                                 | .....                                                 | .....                                                 | .....                                                 | .....                                                 | .....                                                 | .....                                                 | .....                                                 |
| <i>P.reichenowi</i> | .....                                                 | .....                                                 | .....C.....                                           | .....                                                 | .....                                                 | .....                                                 | .....                                                 | .....                                                 |

PFD0955w - Pf34

|                     |            |            |            |           |           |           |            |           |
|---------------------|------------|------------|------------|-----------|-----------|-----------|------------|-----------|
|                     | 10         | 20         | 30         | 40        | 50        | 60        | 70         | 80        |
| PFD0955w            | ATGTATGGTA | CATTTTGGAA | GGGGTCCATT | TTTACCTGT | GTATATTTT | CCCATTTTT | TCGTGTGAGT | GTAATAAAT |
| 3D7                 | .....      | .....      | .....      | .....     | .....     | .....     | .....      | .....     |
| RO33                | .....      | .....      | .....      | .....     | .....     | .....     | .....      | .....     |
| Palo Alto           | .....      | .....      | .....      | .....     | .....     | .....     | .....      | .....     |
| FCR3                | .....      | .....      | .....      | .....     | .....     | .....     | .....      | .....     |
| Wellcome            | .....      | .....      | .....      | .....     | .....     | .....     | .....      | .....     |
| D6                  | .....      | .....      | .....      | .....     | .....     | .....     | .....      | .....     |
| T996                | .....      | .....      | .....      | .....     | .....     | .....     | .....      | .....     |
| T9102               | .....      | .....      | .....      | .....     | .....     | .....     | .....      | .....     |
| K1                  | .....      | .....      | .....      | .....     | .....     | .....     | .....      | .....     |
| Dd2                 | .....      | .....      | .....      | .....     | .....     | .....     | .....      | .....     |
| D10                 | .....      | .....      | .....      | .....     | .....     | .....     | .....      | .....     |
| FCC2                | .....      | .....      | .....      | .....     | .....     | .....     | .....      | .....     |
| HB3                 | .....      | .....      | .....      | .....     | .....     | .....     | .....      | .....     |
| 7G8                 | .....      | .....      | .....      | .....     | .....     | .....     | .....      | .....     |
| <i>P.reichenowi</i> | .....      | .....      | .....      | .....     | .....     | .....     | .....      | .....     |

|                     |            |            |           |            |            |            |            |            |
|---------------------|------------|------------|-----------|------------|------------|------------|------------|------------|
|                     | 90         | 100        | 110       | 120        | 130        | 140        | 150        | 160        |
| PFD0955w            | AAAAATTAAC | GATAAAGAGA | ATATAAATT | TGAGAGTTAT | TTTAATAAAA | GGACAAATGA | AGAAAATGTA | TTAAATAAAA |
| 3D7                 | .....      | .....      | .....     | .....      | .....      | .....      | .....      | .....      |
| RO33                | .....      | .....      | .....     | .....      | .....      | .....      | .....      | .....      |
| Palo Alto           | .....      | .....      | .....     | .....      | .....      | .....      | .....      | .....      |
| FCR3                | .....      | .....      | .....     | .....      | .....      | .....      | .....      | .....      |
| Wellcome            | .....      | .....      | .....     | .....      | .....      | .....      | .....      | .....      |
| D6                  | .....      | .....      | .....     | .....      | .....      | .....      | .....      | .....G     |
| T996                | .....      | .....      | .....     | .....      | .....      | .....      | .....      | .....      |
| T9102               | .....      | .....      | .....C    | .....      | .....      | .....      | .....      | .....      |
| K1                  | .....      | .....      | .....     | .....      | .....      | .....      | .....      | .....      |
| Dd2                 | .....      | .....      | .....     | .....      | .....      | .....      | .....      | .....      |
| D10                 | .....      | .....      | .....     | .....      | .....      | .....      | .....      | .....      |
| FCC2                | .....      | .....      | .....     | .....      | .....      | .....      | .....      | .....      |
| HB3                 | .....      | .....      | .....     | .....      | .....      | .....      | .....      | .....      |
| 7G8                 | .....      | .....      | .....     | .....      | .....      | .....      | .....      | .....      |
| <i>P.reichenowi</i> | .....      | .....T     | .....     | .....      | .....      | .....A     | .....      | .....      |

|                     |            |            |           |            |            |           |            |            |
|---------------------|------------|------------|-----------|------------|------------|-----------|------------|------------|
|                     | 170        | 180        | 190       | 200        | 210        | 220       | 230        | 240        |
| PFD0955w            | ACGTATCGAA | AGAAATGGGG | GATACGTTG | TTGCACATAA | GGCTATAGAA | TAAACATTA | ATCATCACCA | CGTTAATAAT |
| 3D7                 | .....      | .....      | .....     | .....      | .....      | .....     | .....      | .....      |
| RO33                | .....      | .....      | .....     | .....      | .....      | .....     | .....      | .....      |
| Palo Alto           | .....      | .....      | .....     | .....      | .....      | .....     | .....      | .....      |
| FCR3                | .....      | .....      | .....     | .....      | .....      | .....     | .....      | .....      |
| Wellcome            | .....      | .....      | .....     | .....      | .....      | .....     | .....      | .....      |
| D6                  | .....      | .....      | .....     | .....      | .....      | .....     | .....      | .....      |
| T996                | .....      | .....      | .....     | .....      | .....      | .....     | .....      | .....      |
| T9102               | .....      | .....      | .....     | .....      | .....      | .....     | .....      | .....      |
| K1                  | .....      | .....      | .....     | .....      | .....      | .....     | .....      | .....      |
| Dd2                 | .....      | .....      | .....     | .....      | .....      | .....     | .....      | .....      |
| D10                 | .....      | .....      | .....     | .....      | .....      | .....     | .....      | .....      |
| FCC2                | .....      | .....      | .....     | .....      | .....      | .....     | .....      | .....      |
| HB3                 | .....      | .....      | .....     | .....      | .....      | .....     | .....      | .....      |
| 7G8                 | .....      | .....      | .....     | .....      | .....      | .....     | .....      | .....      |
| <i>P.reichenowi</i> | GGA.....   | .....      | .....     | .....      | .....A     | .....     | .....      | .....      |

|                     |            |            |            |            |            |            |            |            |
|---------------------|------------|------------|------------|------------|------------|------------|------------|------------|
|                     | 250        | 260        | 270        | 280        | 290        | 300        | 310        | 320        |
| PFD0955w            | GATAAAGAAT | TTAATAATAA | TAATAATAAT | AAACATCAGC | CTTATTATCA | TAATGAGCAT | GATAAAGAAT | TTTCTGAAAG |
| 3D7                 | .....      | .....      | .....      | .....      | .....      | .....      | .....      | .....      |
| RO33                | .....      | .....      | .....      | .....      | .....      | .....      | .....      | .....      |
| Palo Alto           | .....      | .....      | .....      | .....      | .....      | .....      | .....      | .....      |
| FCR3                | .....      | .....      | .....      | .....      | .....      | .....      | .....      | .....      |
| Wellcome            | .....      | .....      | .....      | .....      | .....      | .....      | .....      | .....      |
| D6                  | .....      | .....      | .....      | .....      | .....      | .....      | .....      | .....      |
| T996                | .....      | .....      | .....      | .....      | .....      | .....      | .....      | .....      |
| T9102               | .....      | .....      | .....      | .....      | .....      | .....      | .....      | .....      |
| K1                  | .....      | .....      | .....      | .....      | .....      | .....      | .....      | .....      |
| Dd2                 | .....      | .....      | .....      | .....      | .....      | .....      | .....      | .....      |
| D10                 | .....      | .....      | .....      | .....      | .....      | .....      | .....      | .....      |
| FCC2                | .....      | .....      | .....      | .....      | .....      | .....      | .....      | .....      |
| HB3                 | .....      | .....      | .....      | .....      | .....      | .....      | .....      | .....      |
| 7G8                 | .....      | .....      | .....      | .....      | .....      | .....      | .....      | .....      |
| <i>P.reichenowi</i> | .....      | .....      | -----      | .....G     | .....      | .....G     | .....      | .....      |

|                     |           |            |            |            |            |            |            |           |
|---------------------|-----------|------------|------------|------------|------------|------------|------------|-----------|
|                     | 330       | 340        | 350        | 360        | 370        | 380        | 390        | 400       |
|                     | .....     | .....      | .....      | .....      | .....      | .....      | .....      | .....     |
| PFD0955w            | TTTAAAGCA | CATATGGATC | ACCTTAAGAT | ATTAAATAAT | GATTTAAAAC | AACATATAGA | TAAAAAAGAG | AGAAATGAA |
| 3D7                 | .....     | .....      | .....      | .....      | .....      | .....      | .....      | .....     |
| RO33                | .....     | .....      | .....      | .....      | .....      | .....      | .....      | .....     |
| Palo Alto           | .....     | .....      | .....      | .....      | .....      | .....      | .....      | .....     |
| FCR3                | .....     | .....      | .....      | .....      | .....      | .....      | .....      | .....     |
| Wellcome            | .....     | .....      | .....      | .....      | .....      | .....      | .....      | .....     |
| D6                  | .....     | .....      | .....      | .....      | .....      | .....      | .....      | .....     |
| T996                | .....     | .....      | .....      | .....      | .....      | .....      | .....      | .....     |
| T9102               | .....     | .....      | .....      | .....      | .....      | .....      | .....      | .....     |
| K1                  | .....     | .....      | .....      | .....      | .....      | .....      | .....      | .....     |
| Dd2                 | .....     | .....      | .....      | .....      | .....      | .....      | .....      | .....     |
| D10                 | .....     | .....      | .....      | .....      | .....      | .....      | .....      | .....     |
| FCC2                | .....     | .....      | .....      | .....      | .....      | .....      | .....      | .....     |
| HB3                 | .....     | .....      | .....      | .....      | .....      | .....      | .....      | .....     |
| 7G8                 | .....     | .....      | .....      | .....      | .....      | .....      | .....      | .....     |
| <i>P.reichenowi</i> | .....     | .....      | .....      | .....      | .....G     | .....      | .....      | .....     |

|                     |           |            |            |           |            |            |            |            |
|---------------------|-----------|------------|------------|-----------|------------|------------|------------|------------|
|                     | 410       | 420        | 430        | 440       | 450        | 460        | 470        | 480        |
|                     | .....     | .....      | .....      | .....     | .....      | .....      | .....      | .....      |
| PFD0955w            | TATATGAAA | TAATGATTTA | AAAAAATATA | TAATAAAGA | GATACAAAAT | AATAAATATT | TAAATAAAGA | AAAGAAAAGC |
| 3D7                 | .....     | .....      | .....      | .....     | .....      | .....      | .....      | .....      |
| RO33                | .....     | .....      | .....      | .....     | .....      | .....      | .....      | .....      |
| Palo Alto           | .....     | .....      | .....      | .....     | .....      | .....      | .....      | .....      |
| FCR3                | .....     | .....      | .....      | .....     | .....      | .....      | .....      | .....      |
| Wellcome            | .....     | .....      | .....      | .....     | .....      | .....      | .....      | .....      |
| D6                  | .....     | .....      | .....      | .....     | .....      | .....      | .....      | .....      |
| T996                | .....     | .....      | .....      | .....     | .....      | .....      | .....      | .....      |
| T9102               | .....     | .....      | .....      | .....     | .....      | .....      | .....      | .....      |
| K1                  | .....     | .....      | .....      | .....     | .....      | .....      | .....      | .....      |
| Dd2                 | .....     | .....      | .....      | .....     | .....      | .....      | .....      | .....      |
| D10                 | .....     | .....      | .....      | .....     | .....      | .....      | .....      | .....      |
| FCC2                | .....     | .....      | .....      | .....     | .....      | .....      | .....      | .....      |
| HB3                 | .....     | .....      | .....      | .....     | .....      | .....      | .....      | .....      |
| 7G8                 | .....     | .....      | .....      | .....     | .....      | .....      | .....      | .....      |
| <i>P.reichenowi</i> | .....     | .....      | .....      | .....     | .....      | .....      | .....      | .....G     |

|                     |            |            |            |            |            |            |            |            |
|---------------------|------------|------------|------------|------------|------------|------------|------------|------------|
|                     | 490        | 500        | 510        | 520        | 530        | 540        | 550        | 560        |
|                     | .....      | .....      | .....      | .....      | .....      | .....      | .....      | .....      |
| PFD0955w            | AGTGAAGATA | TTCAAATATT | AGAAGAGCAT | TCAAAAAAAT | TACAAAAAGA | AATTCATGAA | TGGTTAGAAT | CTGTTAATAA |
| 3D7                 | .....      | .....      | .....      | .....      | .....      | .....      | .....      | .....      |
| RO33                | .....      | .....      | .....      | .....      | .....      | .....      | .....      | .....      |
| Palo Alto           | .....      | .....      | .....      | .....      | .....      | .....      | .....      | .....      |
| FCR3                | .....      | .....      | .....      | .....      | .....      | .....      | .....      | .....      |
| Wellcome            | .....      | .....      | .....      | .....      | .....      | .....      | .....      | .....      |
| D6                  | .....      | .....      | .....      | .....      | .....      | .....      | .....      | .....      |
| T996                | .....      | .....      | .....      | .....      | .....      | .....      | .....      | .....      |
| T9102               | .....      | .....      | .....      | .....      | .....      | .....      | .....      | .....      |
| K1                  | .....      | .....      | .....      | .....      | .....      | .....      | .....      | .....      |
| Dd2                 | .....      | .....      | .....      | .....      | .....      | .....      | .....      | .....      |
| D10                 | .....      | .....      | .....      | .....      | .....      | .....      | .....      | .....      |
| FCC2                | .....      | .....      | .....      | .....      | .....      | .....      | .....      | .....      |
| HB3                 | .....      | .....      | .....      | .....      | .....      | .....      | .....      | .....      |
| 7G8                 | .....      | .....      | .....      | .....      | .....      | .....      | .....      | .....      |
| <i>P.reichenowi</i> | .....      | .....      | .....      | .....      | .....      | .....      | .....      | .....G     |

|                     |            |            |            |            |            |            |            |            |
|---------------------|------------|------------|------------|------------|------------|------------|------------|------------|
|                     | 570        | 580        | 590        | 600        | 610        | 620        | 630        | 640        |
|                     | .....      | .....      | .....      | .....      | .....      | .....      | .....      | .....      |
| PFD0955w            | TATTGAAGAG | AAATCAAATA | TTTTAAAAAA | TATCAAAAGT | CAATTATTAA | ATAATATAGC | TTCTTTAAAT | CATACGCTCT |
| 3D7                 | .....      | .....      | .....      | .....      | .....      | .....      | .....      | .....      |
| RO33                | .....      | .....      | .....      | .....      | .....      | .....      | .....      | .....      |
| Palo Alto           | .....      | .....      | .....      | .....      | .....      | .....      | .....      | .....      |
| FCR3                | .....      | .....      | .....      | .....      | .....      | .....      | .....      | .....      |
| Wellcome            | .....      | .....      | .....      | .....      | .....      | .....      | .....      | .....      |
| D6                  | .....      | .....      | .....      | .....      | .....      | .....      | .....      | .....      |
| T996                | .....      | .....      | .....      | .....      | .....      | .....      | .....      | .....      |
| T9102               | .....      | .....      | .....      | .....      | .....      | .....      | .....      | .....      |
| K1                  | .....      | .....      | .....      | .....      | .....      | .....      | .....      | .....      |
| Dd2                 | .....      | .....      | .....      | .....      | .....      | .....      | .....      | .....      |
| D10                 | .....      | .....      | .....      | .....      | .....      | .....      | .....      | .....      |
| FCC2                | .....      | .....      | .....      | .....      | .....      | .....      | .....      | .....      |
| HB3                 | .....      | .....      | .....      | .....      | .....      | .....      | .....      | .....      |
| 7G8                 | .....      | .....      | .....      | .....      | .....      | .....      | .....      | .....      |
| <i>P.reichenowi</i> | .....      | .....      | .....G.T   | .....C     | .....      | .....      | .....      | .....A     |

|                     |            |            |            |            |            |           |           |                      |
|---------------------|------------|------------|------------|------------|------------|-----------|-----------|----------------------|
|                     | 650        | 660        | 670        | 680        | 690        | 700       | 710       | 720                  |
| PF0955w             | CAGAAGAAAT | AAAAAATATT | AACGATATAA | AAGAATTACA | AAAACAACAA | AATGATTAT | TTTCTGAAA | TTGGTTATAT           |
| 3D7                 | .....      | .....      | .....      | .....      | .....      | .....     | .....     | .....                |
| RO33                | .....      | .....      | .....      | .....      | .....      | .....     | .....     | .....                |
| Palo Alto           | .....      | .....      | .....      | .....      | .....      | .....     | .....     | .....                |
| FCR3                | .....      | .....      | .....      | .....      | .....      | .....     | .....     | .....                |
| Wellcome            | .....      | .....      | .....      | .....      | .....      | .....     | .....     | .....                |
| D6                  | .....      | .....      | .....      | .....      | .....      | .....     | .....     | .....                |
| T996                | .....      | .....      | .....      | .....      | .....      | .....     | .....     | .....                |
| T9102               | .....      | .....      | .....      | .....      | .....      | .....     | .....     | .....                |
| K1                  | .....      | .....      | .....      | .....      | .....      | .....     | .....     | .....                |
| Dd2                 | .....      | .....      | .....      | .....      | .....      | .....     | .....     | .....                |
| D10                 | .....      | .....      | .....      | .....      | .....      | .....     | .....     | .....                |
| FCC2                | .....      | .....      | .....      | .....      | .....      | .....     | .....     | .....                |
| HB3                 | .....      | .....      | .....      | .....      | .....      | .....     | .....     | .....                |
| 7G8                 | .....      | .....      | .....      | .....      | .....      | .....     | .....     | .....                |
| <i>P.reichenowi</i> | .....      | .....      | .....      | .....      | .....      | .....     | .....     | ..... <b>T</b> ..... |

|                     |                      |            |                      |           |            |                      |                      |                      |
|---------------------|----------------------|------------|----------------------|-----------|------------|----------------------|----------------------|----------------------|
|                     | 730                  | 740        | 750                  | 760       | 770        | 780                  | 790                  | 800                  |
| PF0955w             | TTTCTTCCAT           | CCTCATCAGA | TTATCTCTTA           | AACGAAAAA | AAAAAAATTT | ATATGATAAT           | CAAGATAATA           | GTATGAAGGA           |
| 3D7                 | .....                | .....      | .....                | .....     | .....      | .....                | .....                | .....                |
| RO33                | .....                | .....      | .....                | .....     | .....      | .....                | .....                | .....                |
| Palo Alto           | .....                | .....      | .....                | .....     | .....      | .....                | .....                | .....                |
| FCR3                | .....                | .....      | .....                | .....     | .....      | .....                | .....                | .....                |
| Wellcome            | .....                | .....      | .....                | .....     | .....      | .....                | .....                | .....                |
| D6                  | .....                | .....      | .....                | .....     | .....      | .....                | .....                | .....                |
| T996                | .....                | .....      | .....                | .....     | .....      | .....                | .....                | .....                |
| T9102               | .....                | .....      | .....                | .....     | .....      | .....                | .....                | .....                |
| K1                  | .....                | .....      | .....                | .....     | .....      | .....                | .....                | .....                |
| Dd2                 | .....                | .....      | .....                | .....     | .....      | .....                | .....                | .....                |
| D10                 | .....                | .....      | .....                | .....     | .....      | .....                | .....                | .....                |
| FCC2                | .....                | .....      | .....                | .....     | .....      | .....                | .....                | .....                |
| HB3                 | .....                | .....      | .....                | .....     | .....      | .....                | .....                | .....                |
| 7G8                 | .....                | .....      | ..... <b>T</b> ..... | .....     | .....      | .....                | .....                | .....                |
| <i>P.reichenowi</i> | ..... <b>T</b> ..... | .....      | .....                | .....     | .....      | ..... <b>C</b> ..... | ..... <b>G</b> ..... | ..... <b>C</b> ..... |

|                     |            |            |            |                      |            |                      |                      |            |
|---------------------|------------|------------|------------|----------------------|------------|----------------------|----------------------|------------|
|                     | 810        | 820        | 830        | 840                  | 850        | 860                  | 870                  | 880        |
| PF0955w             | TGATATAAAT | AATAATGACA | AATATAATAT | TTTTAATTAT           | TTACAAAACG | TTCAAGATAA           | GGATAACCAA           | TATGAAGTTA |
| 3D7                 | .....      | .....      | .....      | .....                | .....      | .....                | .....                | .....      |
| RO33                | .....      | .....      | .....      | .....                | .....      | .....                | .....                | .....      |
| Palo Alto           | .....      | .....      | .....      | .....                | .....      | .....                | .....                | .....      |
| FCR3                | .....      | .....      | .....      | .....                | .....      | .....                | .....                | .....      |
| Wellcome            | .....      | .....      | .....      | .....                | .....      | .....                | .....                | .....      |
| D6                  | .....      | .....      | .....      | .....                | .....      | .....                | .....                | .....      |
| T996                | .....      | .....      | .....      | .....                | .....      | .....                | .....                | .....      |
| T9102               | .....      | .....      | .....      | .....                | .....      | .....                | .....                | .....      |
| K1                  | .....      | .....      | .....      | .....                | .....      | .....                | .....                | .....      |
| Dd2                 | .....      | .....      | .....      | .....                | .....      | .....                | .....                | .....      |
| D10                 | .....      | .....      | .....      | .....                | .....      | .....                | .....                | .....      |
| FCC2                | .....      | .....      | .....      | .....                | .....      | .....                | .....                | .....      |
| HB3                 | .....      | .....      | .....      | .....                | .....      | .....                | .....                | .....      |
| 7G8                 | .....      | .....      | .....      | .....                | .....      | .....                | .....                | .....      |
| <i>P.reichenowi</i> | .....      | .....      | .....      | ..... <b>C</b> ..... | .....      | ..... <b>A</b> ..... | ..... <b>G</b> ..... | .....      |

|                     |                      |            |            |                       |            |            |            |            |
|---------------------|----------------------|------------|------------|-----------------------|------------|------------|------------|------------|
|                     | 890                  | 900        | 910        | 920                   | 930        | 940        | 950        | 960        |
| PF0955w             | TGAAACAAGA           | CAATAATAAT | ATACATAGTG | GTTCCCTCTAC           | TCATAATCAT | CTATTATTAA | CTTGTATAAT | TTTTTTGTTA |
| 3D7                 | .....                | .....      | .....      | .....                 | .....      | .....      | .....      | .....      |
| RO33                | .....                | .....      | .....      | .....                 | .....      | .....      | .....      | .....      |
| Palo Alto           | .....                | .....      | .....      | .....                 | .....      | .....      | .....      | .....      |
| FCR3                | .....                | .....      | .....      | .....                 | .....      | .....      | .....      | .....      |
| Wellcome            | .....                | .....      | .....      | .....                 | .....      | .....      | .....      | .....      |
| D6                  | .....                | .....      | .....      | .....                 | .....      | .....      | .....      | .....      |
| T996                | .....                | .....      | .....      | .....                 | .....      | .....      | .....      | .....      |
| T9102               | .....                | .....      | .....      | .....                 | .....      | .....      | .....      | .....      |
| K1                  | .....                | .....      | .....      | .....                 | .....      | .....      | .....      | .....      |
| Dd2                 | .....                | .....      | .....      | .....                 | .....      | .....      | .....      | .....      |
| D10                 | .....                | .....      | .....      | .....                 | .....      | .....      | .....      | .....      |
| FCC2                | .....                | .....      | .....      | .....                 | .....      | .....      | .....      | .....      |
| HB3                 | .....                | .....      | .....      | .....                 | .....      | .....      | .....      | .....      |
| 7G8                 | .....                | .....      | .....      | .....                 | .....      | .....      | .....      | .....      |
| <i>P.reichenowi</i> | ..... <b>A</b> ..... | .....      | .....      | ..... <b>CA</b> ..... | .....      | .....      | .....      | .....      |

....|....|....|...  
ATACTTTTAA TTTTATAA

PFD0955w  
3D7  
RO33  
Palo Alto  
FCR3  
Wellcome  
D6  
T996  
T9102  
K1  
Dd2  
D10  
FCC2  
HB3  
7G8  
*P.reichenowi*

.....
