# Supplementary material for: Prospective Identification of Malaria Parasite Genes under Balancing Selection
Source: PubMed Central journal article supplement (PMC2679211; doi:10.1371/journal.pone.0005568), 2009-05-15
Supplement: pone.0005568.s004.pdf [file pone.0005568.s004.pdf]

**Supplementary Figure 4**

**PF13\_0338 [Pf92] Repeat 1**

```
[P reichenowi      GDIVYGHREFKGG]
Dd2                GDIVYGHREFKGG-----
T9/96              GDIVYGHREFKGGIVYGHREFKGG-----
T9/102             GDIVYGHREFKGG-----
R033               GDIVYGHREFKGGIVYGHREFKGG-----
3D7                GDIVYGHREFKGG-----
K1                 GDIVYGHREFKGGIVYGHREFKGG-----
Palo Alto          GDIVYGHREFKGGIVYGHREFKGG-----
FCR3               GDIVYGHREFKGGIVYGHREFKGGIVYGHREFK
D10                GDIVYGHREFKGGIVYGHREFKGG-----
HB3                GDIVYGHREFKGG-----
Wellcome           GDIVYGHREFKGGIVYGHREFKGGIVYGHREFK
Fcc2               GDIVYGHREFKGG-----
7G8                GDIVYGHREFKGG-----
D6                 GDIVYGHREFKGG-----
*****
```

**PF14\_0201 [Pf113] Repeat block**

```
[P reichenowi -NNNNN--]
Dd2                NNNNNNNN
T9/96              NNNNNN--
T9/102             NNNNNNNN
R033               NNNNNN--
3D7                NNNNNNNN
K1                 NNNNNNNN
Palo Alto          NNNNNNNN
FCR3               NNNNNNNN
D10                NNNNNNNN
HB3                NNNNNNNN
Wellcome           NNNNNNNN
Fcc2               NNNNNNNN
7G8                NNNNNNNN
D6                 NNNNNN--
*****
```

**PFF0995c [MSP10] Repeat block 1**

```
[P reichenowi KNDNK---DSIYNNNN--DNINK-----]
Dd2                KNDNKDNKDNIYNDNINN-----
T9/96              KNDNKDN----YNDNINNDNINN-----
T9/102             KNDNKDNKDNIYNDNINNDNINN-----
R033               KNDNKDNKDNIYNDNINNDNINN-----
3D7                KNDNKDNKDNIYNDNINNDNINNDNINN
K1                 KNDNKDNKDNIYNDNINNDNINN-----
Palo Alto          KNDNKDN----YNDNINNDNINN-----
FCR3               KNDNKDNKDNIYNDNINN-----
D10                KNDNKDN----YNDNINNDNINN-----
HB3                KNDNKDNKDNIYNDNINNDNINN-----
Wellcome           KNDNKDNKDNIYNDNINN-----
Fcc2               KNDNKDNKDNIYNDNINN-----
7G8                KNDNKDNKDNIYNDNINN-----
D6                 KNDNKDNKDNIYNDNINNDNINN-----
*****          *****
```



PF10\_0346 [MSP6]

[P reichenowi NDEEETETETENLETEEDNNEEIEENEEDDIDEEIVEENEEDDINDESVEEKEEKTEEK TENK]  
Dd2 DEDEDEXXXTETENLETEEDNNEEIEENEEDDIDEESVEEKEEEEEKKEEEEKKEEKKEEK  
T9/96 DEDEDEXXXTETENLETEEDNNEEIEENEEDDIDEESVEEKEEEEEKKEEEEKKEEKKEEK  
T9/102 DEDEDEXXXTETENLETEEDNNEEIEENEEDDIDEESVEEKEEEEEKKEEEEKKEEKKEEK  
R033 DEDEDEXXXTETENLETEEDNNEEIEENEEDDIDEESVEEKEEEEEKKEEEEKKEEKKEEK  
3D7 DEDEDEXXXTETENLETEEDNNEEIEENEEDDIDEESVEEKEEEEEKKEEEEKKEEKKEEK  
K1 DEDEDEXXXTETENLETEEDNNEEIEENEEDDIDEESVEEKEEEEEKKEEEEKKEEKKEEK  
Palo Alto DEDEDEDEETETENLETEEDNNEEIEENEEDDIDEESVEEKEEEEEKKEEEEKKEEKKEEK  
FCR3 DEDEDEXXXTETENLETEEDNNEEIEENEEDDIDEESVEEKEEEEEKKEEEEKKEEKKEEK  
D10 DEDEDEXXXTETENLETEEDNNEEIEENEEDDIDEESVEEKEEEEEKKEEEEKKEEKKEEK  
HB3 DEDEDEXXXTETENLETEEDNNEEIEENEEDDIDEESVEEKEEEEEKKEEEEKKEEKKEEK  
Wellcome DEDEDEXXXTETENLETEEDNNEEIEENEEDDIDEESVEEKEEEEEKKEEEEKKEEKKEEK  
Fcc2 DEDEDEXXXTETENLETEEDNNEEIEENEEDDIDEESVEEKEEEEEKKEEEEKKEEKKEEK  
7G8 DEDEDEXXXTETENLETEEDNNEEIEENEEDDIDEESVEEKEEEEEKKEEEEKKEEKKEEK  
D6 DEDEDEXXXTETENLETEEDNNEEIEENEEDDIDEESVEEKEEEEEKKEEEEKKEEKKEEK  
\*\*\*\*\*

**PF13\_0193 [MRSP3]**

[*P reichenowi* sequence stops short of repeat region]

|           |                             |
|-----------|-----------------------------|
| Dd2       | KQEDKQEDKREDK-----QE        |
| T9/96     | KQEDKQEDKREDK-----QE        |
| T9/102    | KQEDKQEDKREDK-----QE        |
| R033      | KQEDKQEDKREDK-----QE        |
| 3D7       | KQEDKQEDKREDK-----QE        |
| K1        | KQEDKQEDKREDK-----QE        |
| Palo Alto | KQEDKQEDKREDK-----QE        |
| FCR3      | KQEDKQEDKREDK-----QE        |
| D10       | KQEDKQEDKREDK-----QE        |
| HB3       | KQEDKQEDKREDK-----QE        |
| Wellcome  | KQEDKQEDKREDK-----QE        |
| Fcc2      | KQEDKQEDKREDK-----QE        |
| 7G8       | KQEDKQEDKREDK-----QE        |
| D6        | KQEDKQEDKREDKQEDKQEDKREDKQE |
|           | ***** **                    |

**MAL13P1.173 [MRSP4]**

[*P reichenowi* ELEKEKE--

|           |           |
|-----------|-----------|
| Dd2       | ELEKEKEKE |
| T9/96     | ELEKEKEKE |
| T9/102    | ELEKEKEKE |
| R033      | ELEKEKEKE |
| 3D7       | ELEKEKEKE |
| K1        | ELEKEKEKE |
| Palo Alto | ELEKEKEKE |
| FCR3      | ELEKEKE-- |
| D10       | ELEKEKEKE |
| HB3       | ELEKEKEKE |
| Wellcome  | ELEKEKE-- |
| Fcc2      | ELEKEKEKE |
| 7G8       | ELEKEKEKE |
| D6        | ELEKEKEKE |
|           | *****     |

**PF13\_0191 [MRSP5] Repeat block 1**

[*P reichenowi* DEEETDEDDDEDSDEDDEEQEE [LNVEPKER] EDEQEETDDEQ

|           |                                               |
|-----------|-----------------------------------------------|
| Dd2       | DEEETDEDDDEDSDEDDEEQEE [LNVEPKER] EDEQEETDDEQ |
| T9/96     | DEEETDEDDDEDSDEDDEEQEE [LNVEPKER] EDEQEETDDEQ |
| T9/102    | DEEETDEDDDEDSDEDDEEQEE [LNVEPKER] EDEQEETDDEQ |
| R033      | DEEETDEDDDEDSDEDDEEQEE [LNVEPKER] EDEQEETDDEQ |
| 3D7       | DEEETDEDDDEDSDEDDEEQEE [LNVEPKER] EDEQEETDDEQ |
| K1        | DEEETDEDDDEDSDEDDEEQEE [LNVEPKER] EDEQEETDDEQ |
| Palo Alto | DEEETDEDDDEDSDEDDEEQEE [LNVEPKER] EDEQEETDDEQ |
| FCR3      | DEEETDEDDDEDSDEDDEEQEE [LNVEPKER] EDEQEETDDEQ |
| D10       | DEEETDEDDDEDSDEDDEEQEE [LNVEPKER] EDEQEETDDEQ |
| HB3       | DEEETDEDDDEDSDEDDEEQEE [LNVEPKER] EDEQEETDDEQ |
| Wellcome  | DEEETDEDDDEDSDEDDEEQEE [LNVEPKER] EDEQEETDDEQ |
| Fcc2      | DEEETDEDDDEDSDEDDEEQEE [LNVEPKER] EDEQEETDDEQ |
| 7G8       | DEEETDEDDDEDSDEDDEEQEE [LNVEPKER] EDEQEETDDEQ |
| D6        | DEEETDEDDDEDSDEDDEEQEE [LNVEPKER] EDEQEETDDEQ |
|           | *****[non-rep]*****                           |

PF13\_0191 [MRSP5] Repeat block 2

```

[P reichenowi -----KETDDEQKETDDEQKETDDEQKETDDEQKETDDEQKETDDEQKETDDEQ----- ]
Dd2          -----KETEDEQKETEDEQKETEDEQ-----KESDDEQ-----KETEDEQKETEDEQ-----
T9/96       -----KETEDEQKETEDEQKETEDEQKETEDEQ-----KESDDEQ-----KETEDEQ-----
T9/102      -----KETEDEQKETEDEQKETEDEQKETEDEQ-----KESDDEQ-----KETEDEQKETEDEQ-----
R033        EETDDEQKETEDEQKETEDEQKETEDEQKETEDEQKETEDEQKESDDEQ-----KETEDEQ-----
3D7         -----KETEDEQKETEDEQKETEDEQKETEDEQKETEDEQKESDDEQ-----KETEDEQ-----
K1          -----KETEDEQKETEDEQKETEDEQKETEDEQ-----KESDDEQ-----KETEDEQKETEDEQ-----
Palo Alto   EETDDEQKETEDEQKETEDEQKETEDEQ-----KESDDEQ-----KETEDEQKETEDEQ-----
FCR3        -----KETEDEQKETEDEQKETEDEQ-----KESDDEQ-----KETEDEQKETEDEQKETEDEQ
D10         -----KETEDEQKETEDEQKETEDEQ-----KESDDEQ-----KETEDEQKETEDEQ-----
HB3         -----KETEDEQKETEDEQ-----KESDDEQ-----KETEDEQ-----
Wellcome    -----KETEDEQKETEDEQKETEDEQ-----KESDDEQ-----KETEDEQKETEDEQKETEDEQ
Fcc2        -----KETEDEQKETEDEQKETEDEQKETEDEQKETEDEQKESDDEQ-----KETEDEQ-----
7G8         -----KETEDEQKETEDEQKETEDEQKETEDEQ-----KESDDEQ-----KETEDEQKETEDEQ-----
D6          -----KETEDEQKETEDEQKETEDEQ-----KESDDEQKESDDEQKETEDEQ-----
                *****                               *****                               *****

```

PF13\_0191 [MRSP5] Repeat block 3

```

[P reichenowi DNEEDEEE---ESEENEENNDNTNEENEDNDEN-----EEE ]
Dd2          DNEEDDEEDEDDEEENEENNDNETNEENEDNDEN-----EEE
T9/96       DNEEDDEEDEDDEEENEENNDNETNEENEDNDENEDNDENE
T9/102      DNEEDDEEDEDDEEENEENNDNETNEENEDNDEN-----EEE
R033        DNEEDDEE---DDEEENEENNDNETNEENEDNDEN-----EEE
3D7         DNEEDDEEDEDDEEENEENNDNETNEENEDNDENEDNDENE
K1          DNEEDDEEDEDDEEENEENNDNETNEENEDNDEN-----EEE
Palo Alto   DNEEDDEEDEDDEEENEENNDNETNEENEDNDEN-----EEE
FCR3        DNEEDDEE---DDEEENEENNDNETNEENEDNDEN-----EEE
D10         DNEEDDEEDEDDEEENEENNDNETNEENEDNDEN-----EEE
HB3         DNEEDDEEDEDDEEENEENNDNETNEENEDNDEN-----EEE
Wellcome    DNEEDDEE---DDEEENEENNDNETNEENEDNDEN-----EEE
Fcc2        DNEEDDEEDEDDEEENEENNDNETNEENEDNDEN-----EEE
7G8         DNEEDDEEDEDDEEENEENNDNETNEENEDNDEN-----EEE
D6          DNEEDDEEDEDDEEENEENNDNETNEENEDNDENEDNDENE
                *****                               *****                               ***

```

Pf13\_0192 (MRSP family member) Repeat Block 1

```
[P.reichenowi] GEDDD-----DEDEDDVDEDD-----VDEED
Dd2 GEDDDDFDEDDDDFDEDDDDFDEDDDDFDEDDDFDEDDDE-----DDVDEDD-----LDVED
T9/96 GEDDDDFDEDDDDF-----DEDEDEDEDEDEDDVDEDD-----LDVED
T9/102 GEDDDDFDEDDDDFDEDDDDF-----DEDDDEDEDDVDEDD-----LDVED
RO33 GEDDDDFDEDDDDF-----DEDEDEDEDEDEDDVDEDD-----VDVED
3D7 GEDDDDFDEDDDDF-----DEDEDEDEDEDEDDVDEDD-----LDVED
K1 GEDDDDFDEDDDDFDEDDDDF-----DEDDDEDEDDVDEDD-----LDVED
Palo Alto GEDDDDFDEDDDDF-----DEDEDDVDEDDVDEDDLDVED
FCR3 GEDDDDFDEDDDDFDEDDDDF-----DEDEDEDEDEDE--DDVDEDD-----LDVED
D10 GEDDDDFDEDDDDFDEDDDDF-----DEDEDEDEDEDE--DDVDEDD-----LDVED
HB3 GEDDDDFDEDDDDF-----DEDEDEDEDEDEDEDDVDEDD-----LDVED
Wellcome GEDDDDFDEDDDDFDEDDDDF-----DEDEDEDEDEDEDDVDEDD-----LDVED
FCC2 GEDDDDFDEDDDDF-----DEDEDEDEDEDE--DDVDEDD-----LDVED
7G8 GEDDDDFDEDDDDFDEDDDDF-----DEDEDE--DDVDEDD-----LDVED
D6 GEDDDDFDEDDDDFDEDDDDF-----DEDEDDVDEDDVDEDDVDEDD
***** ** **
```

Pf13\_0192 - Repeat Block 2

```
[P.reichenowi] NINNE-----NNDKH-----
Dd2 NINND-----NNDNNENNDNNENNDNN-----
T9/96 NINNDNNDNNENNDNNENND-----NNDNNENNDNNENNDNN-----
T9/102 NINND-----NNDNNENNDNNENNDNN-----
RO33 NINNDNNENNDNNENNDNNENN-----DNNENNDNNENNDNNENNDNN-----
3D7 NINND-----NNDNNENNDNNENNDNN-----
K1 NINND-----NNDNNENNDNNENNDNNENNDNN
Palo Alto NINND-----NNDNNENNDNN-----
FCR3 NINND-----NNDNNENNDNNENNDNN-----
D10 NINND-----NNDNNENNDNNENNDNN-----
HB3 NINNDNNDNNENNDNNENNDNNENNDNNENNDNNENNDNNENNDNNENNDNN-----
Wellcome NINND-----NNDNNENNDNNENNDNN-----
FCC2 NINND-----NNDNNENNDNNENNDNN-----
7G8 NINND-----NNDNNENNDNNENNDNN-----
D6 NINNDNNE-----NNDNNENNDNNENNDNNENNDNN
**** *****
```

**Pf13\_0192 - Repeat Block 3**

```
[P.reichenowi] NNNNKKKNNQKNNQKNNQKNNQKYNQKNNQKNN
Dd2 NNNNKKKK-----KKNSQKNNQKNNQKNNQKHN
T9/96 NNNNKKKK-----KKNSQKNNQKNNQKNNQKHN
T9/102 NNNNKKKK-----KKNSQKNNQKNNQKNNQKHN
R033 NNNNKKKK-----KKNSQKNNQKNNQKNNQKHN
3D7 NNNNKKKK-----KKNSQKNNQKNNQKNNQKHN
K1 NNNNKKKK-----KKNSQKNNQKNNQKNNQKHN
Palo Alto NNNNKKKK-----KKNSQKNNQKNNQKNNQKHN
FCR3 NNNNKKKK-----KKNSQKNNQKNNQKNNQKHN
D10 NNNNKKKK-----KKNSQKNNQKNNQKNNQKHN
HB3 NNNNKKKK-----KKNSQKNNQKNNQKNNQKHN
Wellcome NNNNKKKK-----KKNSQKNNQKNNQKNNQKHN
FCC2 NNNNKKKK-----KKNSQKNNQKNNQKNNQKHN
7G8 NNNNKKKK-----KKNSQKNNQKNNQKNNQKHN
D6 NNNNKKKK-----KKNSQKNNQKNNQKNNQKHN
*** ** * *****
```

**PF10\_0348 [MSP3/6-like]**

```
[P reichenowi DTED-----]
Dd2          DTED---TDDTEDTED
T9/96        DTEDTEDTDDTEDTED
T9/102       ---DTEDTDDTEDTED
R033         ---DTEDTDDTEDTED
3D7          ---DTEDTDDTEDTED
K1           ---DTEDTDDTEDTED
Palo Alto    ---DTEDTDDTEDTED
FCR3         ---DTEDTDDTEDTED
D10          ---DTEDTDDTEDTED
HB3          ---DTEDTDDTEDTED
Wellcome     ---DTEDTDDTEDTED
Fcc2         ---DTEDTDDTEDTED
7G8          ---DTEDTDDTEDTED
D6           ---DTEDTDDTEDTED
              *****
```

**PF10\_0352 [MSP3/6-like]**

```
[P reichenowi TDVTDETDETEETEETED]
Dd2          TEDTDETDETDDETEETED
T9/96        TEDTDETDETDDETEETED
T9/102       TEDTDETDETDDETEETED
R033         TEDTDETDETDDETEETED
3D7          TEDTDETDETDDETEETED
K1           TEDTDETDETDDETEETED
Palo Alto    TEDTDETDETDDETEETED
FCR3         TEDTDETDETDDETEETED
D10          TEDTDETDETDDETEETED
HB3          TEDTDETDETDDETEETED
Wellcome     TEDTDETDETDDETEETED
Fcc2         TEDTDETDETDDETEETED
7G8          TEDTDETDETDDETEETED
D6           TEDTDETDETDDETEETED
              *****
```

**PFL1385c [MSP9] Repeat block 1**

```
[P reichenowi SANNSLENN----]
Dd2          SANNSANN----
T9/96        SANNSANN----
T9/102       SANNSANN----
R033         SANNSANN----
3D7          SANNSANN----
K1           SANNSANN----
Palo Alto    SANNSANN----
FCR3         SANNSANN----
D10          SANNSANN----
HB3          SANNSANN----
Wellcome     SANNSANN----
Fcc2         SANNSANN----
7G8          SANNSANN----
D6           SANNSANN----
              *****
```



**PFL1385c [MSP9] Repeat block 2 (continued)**

[*P reichenowi* DEEEVNDEEEVNDEEDVNDEEDVNDEEDVNDEEDLNDEED]  
Dd2 DEEDTNDEEDTNDEEDTNDEEDTNDEEDTNDEEDTNDEED  
T9/96 DEEDTNDEEDTNDEEDTNDEEDTNDEEDTNDEEDTNDEED  
T9/102 DEEDTNDEEDTNDEEDTNDEEDTNDEEDTNDEEDTNDEED  
R033 DEEDTNDEEDTNDEEDTNDEEDTNDEEDTNDEEDTNDEED  
3D7 DEEDTNDEEDTNDEEDTNDEEDTNDEEDTNDEEDTNDEED  
K1 DEEDTNDEEDTNDEEDTNDEEDTNDEEDTNDEEDTNDEED  
Palo Alto DEEDTNDEEDTNDEEDTNDEEDTNDEEDTNDEEDTNDEED  
FCR3 DEEDTNDEEDTNDEEDTNDEEDTNDEEDTNDEEDTNDEED  
D10 DEEDTNDEEDTNDEEDTNDEEDTNDEEDTNDEEDTNDEED  
HB3 DEEDTNDEEDTNDEEDTNDEEDTNDEEDTNDEEDTNDEED  
Wellcome DEEDTNDEEDTNDEEDTNDEEDTNDEEDTNDEEDTNDEED  
Fcc2 DEEDTNDEEDTNDEEDTNDEEDTNDEEDTNDEEDTNDEED  
7G8 DEEDTNDEEDTNDEEDTNDEEDTNDEEDTNDEEDTNDEED  
D6 DEEDTNDEEDTNDEEDTNDEEDTNDEEDTNDEEDTNDEED  
\*\*\*\*\*

**PFL1385c [MSP9] Repeat block 3**

[*P reichenowi* KEEKE no further sequence obtained]

|           |                                                                         |
|-----------|-------------------------------------------------------------------------|
| Dd2       | KEEEEKEKEKE-KEKEEKE--KEEKEKEEKE-----KE--KEEKKEEKKEKEEQEEEEEE-           |
| T9/96     | KEEEEKEKEKE-KEKEEKE--KEEKEKEEKE----KEKEEKEKE-----KEEKKEEKKEKEEQEEEEEE-  |
| T9/102    | KEEEEKEKEKE-KEKEEKE--KEEKEKEEKE--KEEKEKEEKEKE--KEEKKEEKKEKEEQEEEEEEG    |
| R033      | KEEEEKEKEKE-KEKEEKE--KEEKEKEEKE--KEE-----KEKE-----KEEKKEKEEQEEEEEE      |
| 3D7       | KEEEEKEKEKEKEKEKEKEKEKEKEKEE--KEEKEKEE-----KEEKKEKEEQEEEEEE             |
| K1        | KEEEEKEKEKE-KEKEEKEKEKEKEKEKEKEE-----KEEKKEKEEQEEEEEE                   |
| Palo Alto | KEEEEKEKEKE-KEKEEKE--KEEKEKEEKEKEKEE--KE-----KEEKKEEKKEKEEQEEEEEE-      |
| FCR3      | KEEEEKEKEKE-KEKEEKE--KEEKE----KEKEEKE--KEKE-----KEEKKEEKKEKEEQE         |
| D10       | KEEEEKEKEKE-KEKEEKE--KEEKE----KEKEEKEKEE-----KEKEEKEEKKEKEEQEEEEEE-     |
| HB3       | KEEEEKEKEKE-KEKEEKE--KEEKE-----KEEKEKEEKEKEKEEKEEKEEKEEKEEKEEER         |
| Wellcome  | KEEEEKEKEKE-KEKEEKE--KEEKE-----KEKEEKE-KEKE-----KEEKKEEKKEKEEQEEEEEE    |
| Fcc2      | KEEEEKEKEKE-KEKEEKE--KEEKE-----KEEKE-----KEKEEKEEKKEKEEQEEEEER          |
| 7G8       | KEEEEKEKEKE-KEKEEKE--KEEKE-----KEEKE-----KE-----KEEE-EEEEEEKEEEEEEEEEEE |
| D6        | KEEEEKEKEKE-KEKEEKE--KEEKE-----KEEKEKEE-----KEE--KEEKKEKEEQEEEEEE       |



**MAL7P1.208 [RAMA] Repeat block 1**

[*P reichenowi* NFLEINNLENEKKEKHEKEDYEYEDNDESFLTEEYEDNEDEKYNKDEDDYAESFIETDKYEDNEDEKYNKDEKYNKDEKYNKDEDDYAE  
Dd2 SFLEINKLENDKKEKHEKEDYEYEDNDESFLTEEYEDNEDEKYNKDEDDYAESFIETDEYEDNED-----  
T9/96 SFLEINKLENDKKEKHEKEDYEYEDNDESFLTEEYEDNEDEKYNKDEDDYAESFIETDEYEDNED-----  
T9/102 SFLEINKLENDKKEKHEKEDYEYEDNDESFLTEEYEDNEDEKYNKDEDDYAESFIETDEYEDNED-----  
R033 SFLEINKLENDKKEKHEKEDYEYEDNDESFLTEEYEDNEDEKYNKDEDDYAESFIETDEYEDNED-----  
3D7 SFLEINKLENDKKEKHEKEDYEYEDNDESFLTEEYEDNEDEKYNKDEDDYAESFIETDEYEDNED-----  
K1 SFLEINKLENDKKEKHEKEDYEYEDNDESFLTEEYEDNEDEKYNKDEDDYAESFIETDEYEDNED-----  
Palo Alto SFLEINKLENDKKEKHEKEDYEYEDNDESFLTEEYEDNEDEKYNKDEDDYAESFIETDEYEDNED-----  
FCR3 SFLEINKLENDKKEKHEKEDYEYEDNDESFLTEEYEDNEDEKYNKDEDDYAESFIETDEYEDNED-----  
D10 SFLEINKLENDKKEKHEKEDYEYEDNDESFLTEEYEDNEDEKYNKDEDDYAESFIETDEYEDNED-----  
HB3 SFLEINKLENDKKEKHEKEDYEYEDNDESFLTEEYEDNEDEKYNKDEDDYAESFIETDEYEDNED-----  
Wellcome SFLEINKLENDKKEKHEKEDYEYEDNDESFLTEEYEDNEDEKYNKDEDDYAESFIETDEYEDNED-----  
Fcc2 SFLEINKLENDKKEKHEKEDYEYEDNDESFLTEEYEDNEDEKYNKDEDDYAESFIETDEYEDNED-----  
7G8 SFLEINKLENDKKEKHEKEDYEYEDNDESFLTEEYEDNEDEKYNKDEDDYAESFIETDEYEDNED-----  
D6 SFLEINKLENDKKEKHEKEDYEYEDNDESFLTEEYEDNEDEKYNKDEDDYAESFIETDEYEDNED-----  
\*\*\*\*\*

**MAL7P1.208 [RAMA] Repeat block 1 (continued)**

[*P reichenowi* SFIETDEYEDNKDDKYNKDEKYNKDEDDYAESFIETDEYDDNE ]  
Dd2 -----DKYNKDEDDYSESFIETDEYDDNE  
T9/96 -----DKYNKDEDDYSESFIETDEYDDNE  
T9/102 -----DKYNKDEDDYSESFIETDEYDDNE  
R033 -----DKYNKDEDDYSESFIETDEYDDNE  
3D7 -----DKYNKDEDDYSESFIETDEYDDNE  
K1 -----DKYNKDEDDYSESFIETDEYDDNE  
Palo Alto -----DKYNKDEDDYSESFIETDEYDDNE  
FCR3 -----DKYNKDEDDYSESFIETDEYDDNE  
D10 -----DKYNKDEDDYSESFIETDEYDDNE  
HB3 -----DKYNKDEDDYSESFIETDEYDDNE  
Wellcome -----DKYNKDEDDYSESFIETDEYDDNE  
Fcc2 -----DKYNKDEDDYSESFIETDEYDDNE  
7G8 -----DKYNKDEDDYSESFIETDEYDDNE  
D6 -----DKYNKDEDDYSESFIETDEYDDNE  
\*\*\*\*\*

**MAL7P1.208 [RAMA] Repeat block 2**

[*P reichenowi* EEMKDEEM-----KYDEMKDDQMNKYDEMKDEEIKDDEMKYDEMKDEEMKYDEMKDEEMKY  
Dd2 EEMKDEEMKDEEMEDVEMKDEEMKDEEMKYDEMKNEEMKYDEM-----  
T9/96 EEMKDEEMKDEEMKDVEEMKDEEMKDEEMKYDEMKNEEMKYDEM-----  
T9/102 EEMKDEEMKDEEMEDVEMKDEEMKDEEMKYDEMKNEEMKYDEM-----  
R033 EEMKDEEMKDEEMKDVEEMKDEEMKDEEMKYDEMKNEEMKYDEM-----  
3D7 EEMKDEEMKDEEMKDVEEMKDEEMKDEEMKYDEMKNEEMKYDEM-----  
K1 EEMKDEEMKDEEMKDVEEMKDEEMKDEEMKYDEMKNEEMKYDEM-----  
Palo Alto EEMKDEEMKDEEMKDVEEMKDEEMKDEEMKYDEMKNEEMKYDEM-----  
FCR3 EEMKDEEMKDEEMEDVEMKDEEMKDEEMKYDEMKNEEMKYDEM-----  
D10 EEMKDEEMKDEEMEDVEMKDEEMKDEEMKYDEMKNEEMKYDEM-----  
HB3 EEMKDEEMKDEEMKDVEEMKDEEMK-----DEEI-----KYDEMKNEEMKYDEM-----  
Wellcome EEMKDEEMKDEEMEDVEMKDEEMKDEEMKYDEMKNEEMKYDEM-----  
Fcc2 EEMKDEEMKDEEMEDVEMKDEEMKDEEMKYDEMKNEEMKYDEM-----  
7G8 EEMKDEEMKDEEMKDVEEMKDEEMKDEEMKYDEMKNEEMKYDEM-----  
D6 EEMKDEEMKDEEMKDVEEMKDEEMKDEEMKYDEMKNEEMKYDEMKDEEMKYDEM-----  
\*\*\*\*\*

**MAL7P1.208 [RAMA] Repeat block 2**

[*P reichenowi* DDMKDEEMKNDKDEEMKDE-----QMEY  
Dd2 -----KDEVKDEEMKDE-----QMKY  
T9/96 -----KDEVKDEEMKDE-----QMKY  
T9/102 -----KDEVKDEEMKDE-----QMKY  
R033 -----KDEVKDEEMKDEEMKDEEMKDEEMKDEQMKY  
3D7 -----KDEVKDEEMKDE-----VMKDEEMKDEQMKY  
K1 -----KDEVKDEEMKDE-----QMKY  
Palo Alto -----KDEVKDEEMKDE-----QMKY  
FCR3 -----KDEVKDEEMKDE-----QMKY  
D10 -----KDEVKDEEMKDE-----QMKY  
HB3 -----KDEVKDEEMKDE-----VMKDEEMKDEQMKY  
Wellcome -----KDEVKDEEMKDE-----QMKY  
Fcc2 -----KDEVKDEEMKDE-----QMKY  
7G8 -----KDEVKDEEMKDEEMKDE-----QMKY  
D6 -----KDEVKDEEMKDE-----QMKY  
\*\*\*\*\*

**MAL7P1.208 [RAMA] Repeat block 3**

```
[P reichenowi EEF-----KNEDKKKED]
Dd2      EEFKNEEFKNEEFKNEESKNEESKNEESKNEESKNEEFKNEESKNEEFKNEEFKNE-----D
T9/96    EEFKNEEFK-----NEESKNEESKNEESKNEESKNEEFKNEESKNEEFKNEEF---
T9/102   EEFKNEEFKNEEFKNEESKNEESKNEESKNEESKNEEFKNEESKNEEFKNEEFKNE-----D
R033     EEFK-----NEESKNEESKNEESK-----NEEFKNEESKNEEFKNEEFKNE-----D
3D7      EEFK-----NEESKNEESKNEESKNEESKNEEFKNEESKNEEFKNEEFKNE-----D
K1       EEFKNEEFKNEEFKNEESKNEESKNEESKNEESKNEEFKNEESKNEEFKNEEFKNE-----D
Palo Alto EEFK-----NEESKNEESKNEESKNEESKNEEFKNEESKNEEFKNEEFKNE-----D
FCR3     EEFKNEEFKNEEFKNEESKNEESKNEESKNEESKNEEFKNEESKNEEFKNEEFKNE-----D
D10      EEFKNEEFKNEEFKNEESKNEESKNEESKNEESKNEEFKNEESKNEEFKNEEFKNE-----D
HB3      EEFK-----NEESKNEESKNEESKNEESKNEEFKNEESKNEEFKNEEF-----
Wellcome EEFKNEEFKNEEFKNEESKNEESKNEESKNEESKNEEFKNEESKNEEFKNEEFKNE-----D
Fcc2     EEFKNEEFKNEEFKNEESKNEESKNEESKNEESKNEEFKNEESKNEEFKNEEFKNE-----D
7G8      EEFKNEEFKNEEFKNEESKNEESKNEESKNEESKNEEFKNEESKNEEFKNEEFKNE-----D
D6       EEFK-----NEESKNEESKNEESKNEESKNEEFKNEESKNEEFKNEEFKNE-----D
*****
```

**MAL7P1.208 [RAMA] Repeat block 4**

```
[P reichenowi KEEKEEKE---]
Dd2      KEEKEEKEEKE
T9/96    KEEKEEKEEKE
T9/102   KEEKEEKEEKE
R033     KEEKEEKEEKE
3D7      KEEKEEKEEKE
K1       KEEKEEKEEKE
Palo Alto KEEKEEKEEKE
FCR3     KEEKEEKEEKE
D10      KEEKEEKEEKE
HB3      KEEKEEKEEKE
Wellcome KEEKEEKEEKE
Fcc2     KEEKEEKEEKE
7G8      KEEKEEKEEKE
D6       KEEKEEKEEKE
*****
```

**PF13\_0348 [Rhop148] Repeat block 1**

```
[P reichenowi NIDD-----DDNNN-----I
Dd2          NIDDDNNNNNIDD-----NNNNNNI
T9/96       NIDD-NNNNNIDDNNNNNIDD--NNNNNNI
T9/102      NIDDDNNNNNIDD-----NNNNNNNI
R033       NIDDDNNNNNIDD-----NNNNNNNI
3D7        NIDDD-----NNNNNNI
K1         NIDDDNNNNNIDD-----NNNNNNI
Palo Alto  NIDDDNNNNNIDDNNNNNIDD-NNNNNNI
FCR3       NIDDDNNNNNIDD-----NNNNNNI
D10       NIDDDNNNNNIDD-----NNNNNNI
HB3       NIDDDNNNNNIDD-----NNNNNNI
Wellcome   NIDDDNNNNNIDD-----NNNNNNI
Fcc2      NIDDDNNNNNIDD-----NNNNNNI
7G8       NIDDDNNNNNIDD-----NNNNNNI
D6        NIDDDNNNNNIDD-----NNNNNNI
          ****                               *****
```

PF13\_0348 [Rhop148] Repeat block 2

[ *P. reichenowi* NANTKMNTKMNTKMNTNANTIINTNTNTIINTNTNTIINTNTNTETN----- ]  
Dd2 NANTNVNTNTNTNTNANVNTNVNTNTNTNANVNTNVNTNTNTNANVNTNVNTNTNTNANVNTNVNTNTNTNANVNTNVNTNTNT-----  
T9/96 NANTNTNANTNTNANVNTNVNTNTNTNANVNTNVNTNTNTNANVNTNVNTNTNTNANVNTNVNTNTNTN-----  
T9/102 NANTNVNTNTNTNTNANVNTNVNTNTNTNANVNTNVNTNTNTNANVNTNVNTNTNTNANVNTNVNTNTNT-----  
R033 NANTNTNANTNTNANVNTNVNTNTNTNANVNTNVNTNTNTNANVNTNVNTNTNTNANVNTNVNTNTNT-----  
3D7 NANTNTNANTNTNANVNTNVNTNVNTNVNTNVNTNTNTNVNTNTNTNVNTNTNTN-----  
K1 NANTNTNANTNTNANVNTNVNTNTNTNANVNTNVNTNTNTNANVNTNVNTNTNTNANVNTNVNTNTNT-----  
Palo Alto NANTNTNANTNTNANVNTNVNTNVNTNTNTNANVNTNVNTNVNTNVNTNTNTNANINTNVNTNTNTN-----  
FCR3 NANTNTNANTNTNANVNTNVNTNTNTNANVNTNVNTNTNTNANVNTNVNTNTNTNANVNTNVNTNTNTNANVNTNVNTNTNT-----  
D10 NANTNTNANTNTNANVNTNVNTNTNTNANVNTNVNTNTNTNANVNTNVNTNTNTNANVNTNVNTNTNTNANVNTNVNTNTNT-----  
HB3 NANTNTNANTNTNANVNTNVNTNTNTNANVNTNVNTNTNTNANINTNVNTNTNTN-----  
Wellcome NANTNTNANTNTNANVNTNVNTNTNTNANVNTNVNTNTNTNANVNTNVNTNTNTNANVNTNVNTNTNTNANVNTNVNTNTNT-----  
Fcc2 NANTNTNANTNTNANVNTNVNTNTNTNANVNTNVNTNTNTNANVNTNVNTNTNTNANVNTNVNTNTNT-----  
7G8 NANTNTNANTNTNANVNTNVNTNTNTNANVNTNVNTNTNTNANINTNVNTNTNTN-----  
D6 NANTNTNANTNTNTNANVNTNVNTNTNTNANVNTNVNTNTNTNANVNTNVNTNTNVNTNTNTN-----



**PF13\_0348 [Rhop148] Repeat block 3**

[*P reichenowi* NNNKNDNNNNNXXNNNNN-----NNNN-YNNYNNI  
Dd2 NNNNDNNNNNDNNNNND-----NNNNINNNNNKKKNNNNNNNNNN----YNNI  
T9/96 NNNNDNNNNNDNNNNNDNNNNND-----NNNNINNNNNKKKNNNNNNNNNN----YNNI  
T9/102 NNNNDNNNNNDNNNNND-----NNNNINNNNNKKKNNNNNNNNNN----YNNI  
R033 NNNNDNNNNNDNNNNNDNNNNND-----NNNNINNNNNKKKNNNNNNNNNN----YNNI  
3D7 NNNNDNNNNNDNNNNNDNNNNND-----NNNNINNNNNKKKNNNNNNNNNN----YNNI  
K1 NNNNDNNNNNDNNNNND-----NNNNINNNNNKKKNNNNNNNNNN----YNNI  
Palo Alto NNNNDNNNNNDNNNNNDNNNNND-----NNNNINNNNNKKKNNNNNNNNNN----YNNI  
FCR3 NNNNDNNNNNDNNNNNDNNNNND-----NNNNINNNNNKKKNNNNNNNNNN----YNNI  
D10 NNNNDNNNNNDNNNNNDNNNNND-----NNNNINNNNNKKKNNNNNNNNNN----YNNI  
HB3 NNNNDNNNNNDNNNNNDNNNNNDNNNNNDNNNNINNNNNKKKNNNNNNNNNN----YNNI  
Wellcome NNNNDNNNNNDNNNNNDNNNNND-----NNNNINNNNNKKKNNNNNNNNNN----YNNI  
Fcc2 NNNNDNNNNNDNNNNND-----NNNNINNNNNKKKNNNNNNNNNN----YNNI  
7G8 NNNNDNNNNNDNNNNNDNNNNND-----NNNNINNNNNKKKNNNNNNNNNN----YNNI  
D6 NNNNDNNNNNDNNNNNDNNNNND-----NNNNINNNNNKKKNNNNNNNNNN----YNNI  
\*\*\*\*\*

**PF13\_0348 [Rhop148] Repeat block 4**

[*P reichenowi* DSSDNNNNNNNNNNNRGSQEIHLLKCDILKNEEYVNSNEYKNKKFIDMSNKGANVCVNIQDNRNNNN  
Dd2 DSSDNNNNNNNNNN-----DSSNNSSNNSSNNSS-----NNNSN  
T9/96 DSSDNNNNNNNNNN-----DSSNNSSNNSS-----NNNSN  
T9/102 DSSDNNNNNNNNNN-----DSSNNSSNNSSNNSS-----NNNSN  
R033 DSSDNNNNNNNNNN-----DSSNNSSNNSS-----NNNSN  
3D7 DSSDNNNNNNNNNN-----DSSNNSS-----NNNSN  
K1 DSSDNNNNNNNNNNNNNNNDSSNNSSNNSS-----NNNSN  
Palo Alto DSSDNNNNNNNNNN-----DSSNNSS-----NNNSN  
FCR3 DSSDNNNNNNNNNN-----DSSNNSS-----NNNSN  
D10 DSSDNNNNNNNNNN-----DSSNNSSNNSS-----NNNSN  
HB3 DSSDNNNNNNNNNN-----DSSNNSSNNSS-----NNNSN  
Wellcome DSSDNNNNNNNNNN-----DSSNNSS-----NNNSN  
Fcc2 DSSDNNNNNNNN-----DSSNNSS-----NNNSN  
7G8 DSSDNNNNNNNNNN-----DSSNNSS-----NNNSN  
D6 DSSDNNNNNNNNNN-----DSSNNSSNNSS-----NNNSN  
\*\*\*\*\*

**Pf13\_0348 [Rhop148] Repeat block 5**  
 [*P reichenowi* NIDNDKNNDSNNNNSSNNNNNC]  
 Dd2 NNDINNDINNNCSNNNNNNNNNC  
 T9/96 NNDINNDINNNCSNNNNNNNN-C  
 T9/102 NNDINNDINNNCSNNNNNNNNNC  
 R033 NNDINNDINNNCSNNNNNNNNNC  
 3D7 NNDINNDINNNCSNNNNNNNNNC  
 K1 NNDINNDINNNCSNNNNNNNNNC  
 Palo Alto NNDINNDINNNCSNNNNNNNNNC  
 FCR3 NNDINNDINNNCSNNNNNNNN-C  
 D10 NNDINNDINNNCSNNNNNNNN-C  
 HB3 NNDINNDINNNCSNNNNNNNNNC  
 Wellcome NNDINNDINNNCSNNNNNNNN-C  
 Fcc2 NNDINNDINNNCSNNNNNNNN-C  
 7G8 NNDINNDINNNCSNNNNNNNNNC  
 D6 NNDINNDINNNCSNNNNNNNNNC  
 \*\*\*\*\* \*

**Pf14\_0102 [RAP1] Repeat block 1**  
 [*P reichenowi* SKSSPSSTKSSSPS]  
 Dd2 LKSSPSITKSSSPS  
 T9/96 SKSSPSSTKSSSPS  
 T9/102 LKSSPSITKSSSPS  
 R033 LKSSPSSTKSSSPS  
 3D7 LKSSPSSTKSSSPS  
 K1 LKSSPSSTKSSSPS  
 Palo Alto SKSSPSSTKSSSPS  
 FCR3 LKSSPSSTKSSSPS  
 D10 LKSSPSSTKSSSPS  
 HB3 SKSSPSSTKSSSPS  
 Wellcome LKSSPSSTKSSSPS  
 Fcc2 LKSSPSSTKSSSPS  
 7G8 SKSSPSSTKSSSPS  
 D6 LKSSPSITKSSSPS  
 \*\*\*\*\*
