# Supplementary material for: Prospective Identification of Malaria Parasite Genes under Balancing Selection
Source: PubMed Central journal article supplement (PMC2679211; doi:10.1371/journal.pone.0005568), 2009-05-15
Supplement: pone.0005568.s005.pdf [file pone.0005568.s005.pdf]

# Alignment of all alleles observed in PF10\_0348 (reference strain 3D7 from PlasmoDB included for comparison)

PlasmoDB 3D7 ref MKKIYSIFFSLFILNLHIYIKNIKCNLDLINYNDNLNRNGLLNNSLDLTNGLNKKDNSFIDSKIEEHENKSYQNKDNNISIVGQDVPITSVYSSKIINAND  
*Plasmodium reichenowi* DSNLRNGLLNNSLDLTNGLNKKDNSFIDSKIEEHENKSYQNKDNNISIVGQDVPITSVASSKIINAND  
3D7 DSNLRNGLLNNSLDLTNGLNKKDNSFIDSKIEEHENKSYQNKDNNISIVGQDVPITSVYSSKIINAND  
RO33 DSNLRNGLLNNSLDLTNGLNKKDNSFIDSKIEEHENKSYQNKDNNISIVGQDVPITSVYSSKIINAND  
FCR3 DSNLRNGLLNNSLDLTNGLNKKDNSFIDSKIEEHENKSYQNKDNNISIVGQDVPITSVYSSKIINAND  
Wellcome DSNLRNGLLNNSLDLTNGLNKKDNSFIDSKIEEHENKSYQNKDNNISIVGQDVPITSVYSSKIINAND  
T996 DSNLRNGLLNNSLDLTNGLNKKDNSFIDSKIEEHENKSYQNKDNNISIVGQDVPITSVYSSKIINAND  
T9102 DSNLRNGLLNNSLDLTNGLNKKDNSFIDSKIEEHENKSYQNKDNNISIVGQDVPITSVYSSKIINAND  
K1 DSNLRNGLLNNSLDLTNGLNKKDNSFIDSKIEEHENKSYQNKDNNISIVGQDVPITSVYSSKIINAND  
Dd2 DSNLRNGLLNNSLDLTNGLNKKDNSFIDSKIEEHENKSYQNKDNNISIVGQDVPITSVYSSKIINAND  
D10 DSNLRNGLLNNSLDLTNGLNKKDNSFIDSKIEEHENKSYQNKDNNISIVGQDVPITSVYSSKIINAND  
FCC2 A DSNLRNGLLNNSLDLTNGLNKKDNSFIDSKIEEHENKSYQNKDNNISIVGQDVPITSVYSSKIINAND  
D6 A DSNLRNGLLNNSLDLTNGLNKKDNSFIDSKIEEHENKSYQNKDNNISIVGQDVPITSVYSSKIINAND  
Palo Alto A DSNLRNGLLNNSLDLTNGLNKKDNSFIDSKIEEHENKSYQNKDNNISIVGQDVPITSVYSSKIINAND  
HB3 DSNLRNGLLNNSLDLTNGLNKKDNSFIDSKIEEHENKSYQNKDNNISIVGQDVPITSVYSSKIINAND  
7G8 DSNLRNGLLNNSLDLTNGLNKKDNSFIDSKIEEHENKSYQNKDNNISIVGQDVPITSVYSSKIINAND  
FCC2 B DSNLRNGLLNNSLDLTNGLNKKDNSFIDSKIEEHENKSYQNKDNNISIVGQDVPITSVYSSKIINAND  
D6 B DSNLRNGLLNNSLDLTNGLNKKDNSFIDSKIEEHENKSYQNKDNNISIVGQDVPITSVYSSKIINAND  
Palo Alto B NKNKNSFIDSKIEEHENKSYQNKDNNISIVGQDVPITSVYSSKIINAND

PlasmoDB 3D7 ref LEGNSIDDTKGLSVTNSGFDDGSAFGGGLPFSGYSPLOQGNHNKCPDENFCCKGIKNVLSCPPKKNSTGRNGDWISVAVKESSTTNKGVLVPPRRTKLCLR-N  
*Plasmodium reichenowi* LEGNSIDDTKGLSVTNSGFDDGSAFGGGLPFSGYSPLOQGNHNKCPDENFCCKGIKNVLSCPPKKNSTGRNGDWISVAVKESSTTNKGVLVPPRRTKLCLR-N  
3D7 LEGNSIDDTKGLSVTNSGFDDGSAFGGGLPFSGYSPLOQGNHNKCPDENFCCKGIKNVLSCPPKKNSTGRNGDWISVAVKESSTTNKGVLVPPRRTKLCLR-N  
RO33 LEGNSIDDTKGLSVTNSGFDDGSAFGGGLPFSGYSPLOQGNHNKCPDENFCCKGIKNVLSCPPKKNSTGRNGDWISVAVKESSTTNKGVLVPPRRTKLCLR-N  
FCR3 LEGNSIDDTKGLSVTNSGFDDGSAFGGGLPFSGYSPLOQGNHNKCPDENFCCKGIKNVLSCPPKKNSTGRNGDWISVAVKESSTTNKGVLVPPRRTKLCLR-N  
Wellcome LEGNSIDDTKGLSVTNSGFDDGSAFGGGLPFSGYSPLOQGNHNKCPDENFCCKGIKNVLSCPPKKNSTGRNGDWISVAVKESSTTNKGVLVPPRRTKLCLR-N  
T996 LEGNSIDDTKGLSVTNSGFDDGSAFGGGLPFSGYSPLOQGNHNKCPDENFCCKGIKNVLSCPPKKNSTGRNGDWISVAVKESSTTNKGVLVPPRRTKLCLR-N  
T9102 LEGNSIDDTKGLSVTNSGFDDGSAFGGGLPFSGYSPLOQGNHNKCPDENFCCKGIKNVLSCPPKKNSTGRNGDWISVAVKESSTTNKGVLVPPRRTKLCLR-N  
K1 LEGNSIDDTKGLSVTNSGFDDGSAFGGGLPFSGYSPLOQGNHNKCPDENFCCKGIKNVLSCPPKKNSTGRNGDWISVAVKESSTTNKGVLVPPRRTKLCLR-N  
Dd2 LEGNSIDDTKGLSVTNSGFDDGSAFGGGLPFSGYSPLOQGNHNKCPDENFCCKGIKNVLSCPPKKNSTGRNGDWISVAVKESSTTNKGVLVPPRRTKLCLR-N  
D10 LEGNSIDDTKGLSVTNSGFDDGSAFGGGLPFSGYSPLOQGNHNKCPDENFCCKGIKNVLSCPPKKNSTGRNGDWISVAVKESSTTNKGVLVPPRRTKLCLR-N  
FCC2 A LEGNSIDDTKGLSVTNSGFDDGSAFGGGLPFSGYSPLOQGNHNKCPDENFCCKGIKNVLSCPPKKNSTGRNGDWISVAVKESSTTNKGVLVPPRRTKLCLR-N  
D6 A LEGNSIDDTKGLSVTNSGFDDGSAFGGGLPFSGYSPLOQGNHNKCPDENFCCKGIKNVLSCPPKKNSTGRNGDWISVAVKESSTTNKGVLVPPRRTKLCLR-N  
Palo Alto A LEGNSIDDTKGLSVTNSGFDDGSAFGGGLPFSGYSPLOQGNHNKCPDENFCCKGIKNVLSCPPKKNSTGRNGDWISVAVKESSTTNKGVLVPPRRTKLCLR-N  
HB3 LEGNSIDDTKGLSVTNSGFDDGSAFGGGLPFSGYSPLOQGNHNKCPDENFCCKGIKNVLSCPPKKNSTGRNGDWISVAVKESSTTNKGVLVPPRRTKLCLR-N  
7G8 LEGNSIDDTKGLSVTNSGFDDGSAFGGGLPFSGYSPLOQGNHNKCPDENFCCKGIKNVLSCPPKKNSTGRNGDWISVAVKESSTTNKGVLVPPRRTKLCLR-N  
FCC2 B LEGNSIDDTKGLSVTNSGFDDGSAFGGGLPFSGYSPLOQGNHNKCPDENFCCKGIKNVLSCPPKKNSTGRNGDWISVAVKESSTTNKGVLVPPRRTKLCLR-N  
D6 B LEGNSIDDTKGLSVTNSGFDDGSAFGGGLPFSGYSPLOQGNHNKCPDENFCCKGIKNVLSCPPKKNSTGRNGDWISVAVKESSTTNKGVLVPPRRTKLCLR-N  
Palo Alto B LEGNSIDDTKGLSVTNSGFDDGSAFGGGLPFSGYSPLOQGNHNKCPDENFCCKGIKNVLSCPPKKNSTGRNGDWISVAVKESSTTNKGVLVPPRRTKLCLR-N

PlasmoDB 3D7 ref  
*Plasmodium reichenowi*  
D7

INKVWHR IKDEKNFKEEFVKVALGESNALMKHYKEKNLNALTAIKYGFSDMGDIKGTDLIDYQITKNINRALDKILRNETSNDKIKKRVDDWEANKSA  
ITHIWRINDEKNFKEEFVKVALGESNALIKYYKEKNLNPLTAIKYGFSDMGDIKGTDLIDYQITKNINRALDKILCNERSNAEIKNRRVDWEANKSE  
INKVWHR IKDEKNFKEEFVKVALGESNALMKHYKEKNLNALTAIKYGFSDMGDIKGTDLIDYQITKNINRALDKILRNETSNDKIKKRVDDWEANKSA  
RO33  
INKVWHR IKDEKNFKEEFVKVALGESNALMKHYKEKNLNALTAIKYGFSDMGDIKGTDLIDYQITKNINRALDKILCNETSNDKIKKRVDDWEANKSA  
FCR3  
INKVWHR IKDEKNFKEEFVKVALGESNALMKHYKEKNLNALTAIKYGFSDMGDIKGTDLIDYQITKNINRALDKILCNETSNDKIKKRVDDWEANKSA  
Wellcome  
INKVWHR IKDEKNFKEEFVKVALGESNALMKHYKEKNLNALTAIKYGFSDMGDIKGTDLIDYQITKNINRALDKILCNETSNDKIKKRVDDWEANKSA  
T996  
INOVWHR IKDEKNFKEEFVKVALGESNALMKHYKEKNLNALTAIKYGFSDMGDIKGTDLIDYQITKNINRALDKILCNETSNDKIKKRVDDWEANKSA  
T9102  
INOVWHR IKDEKNFKEEFVKVALGESNALMKHYKEKNLNALTAIKYGFSDMGDIKGTDLIDYQITKNINRALDKILCNETSNDKIKKRVDDWEANKSA  
K1  
INKVWHR IKDEKNFKEEFVKVALGESNALMKHYKEKNLNALTAIKYGFSDMGDIKGTDLIDYQITKNINRALDKILCNETSNDKIKKRVDDWEANKSA  
Dd2  
INKVWHR IKDEKNFKEEFVKVALGESNALMKHYKEKNLNALTAIKYGFSDMGDIKGTDLIDYQITKNINRALDKILCNETSNDKIKKRVDDWEANKSA  
D10  
INKVWHR IKDEKNFKEEFVKVALGESNALMKHYKEKNLNALTAIKYGFSDMGDIKGTDLIDYQITKNINRALDKILCNETSNDKIKKRVDDWEANKSA  
FCC2 A  
INNFPELKKTEGKFEENFIYSSAGSEAKQLIKLYGNNTAKALQAMKYGFADIGNIVQGNMIDTPTSNTKTYLEEVLGKQYKNVNDPKDAKTWWIQNKHR  
D6 A  
INNFPELKKTEGKFEENFIYSSAGSEAKQLIKLYGNNTAKALQAMKYGFADIGNIVQGNMIDTPTSNTKTYLEEVLGKQYKNVNDPKDAKTWWIQNKHR  
Palo Alto A  
INNFPELKKTEGKFEENFIYSSAGSEAKQLIKLYGNNTAKALQAMKYGFADIGNIVQGNMIDTPTSNTKTYLEEVLGKQYKNVNDPKDAKTWWIQNKHR  
HB3  
INNFPELKKTEGKFEENFIYSSAGSEAKQLIKLYGNNTAKALQAMKYGFADIGNIVQGNMIDTPTSNTKTYLEEVLGKQYKNVNDPKDAKTWWIQNKHR  
7G8  
INNFPELKKTEGKFEENFIYSSAGSEAKQLIKLYGNNTAKALQAMKYGFADIGNIVQGNMIDTPTSNTKTYLEEVLGKQYKNVNDPKDAKTWWIQNKHR  
FCC2 B  
INNFPELKKTEGKFEENFIYSSAGSEAKQLIKLYGNNTAKALQAMKYGFADIGNIVQGNMIDTPTSNTKTYLEEVLGKQYKNVNDPKDAKTWWIQNKHR  
D6 B  
INNFPELKKTEGKFEENFIYSSAGSEAKQLIKLYGNNTAKALQAMKYGFADIGNIVQGNMIDTPTSNTKTYLEEVLGKQYKNVNDPKDAKTWWIQNKHR  
Palo Alto B  
INNFPELKKTEGKFEENFIYSSAGSEAKQLIKLYGNNTAKALQAMKYGFADIGNIVQGNMIDTPTSNTKTYLEEVLGKQYKNVNDPKDAKTWWIQNKHR

PlasmoDB 3D7 ref  
*Plasmodium reichenowi*  
3D7

FWDAFMCGYKVHIGNKPCPEHDNMDRIPQYLRWFREWGTYVCSEYKNKFEDVIKLCNIQQFTNQDQSLLLEISKDKCKEALKHYE EWVNRPRPEWKGQC  
LWDAFMCGYKTHIGNKACPEHDNMDRIPQYLRWFREWGTYVCSEYKNKFENVIKLCNIQQFTNQDQSLLLEISNDKCKEALKHYE EWVNRPRPEWKGQC  
FWDAFMCGYKVHIGNKPCPEHDNMDRIPQYLRWFREWGTYVCSEYKNKFEDVIKLCNIQQFTNQDQSLLLEISKDKCKEALKHYE EWVNRPRPEWKGQC  
RO33  
FWDAFMCGYKVHIGNKPCPEHDNMDRIPQYLRWFREWGTYVCSEYKNKFENVIELCNVRCITNQDQSLLLEISKDKCKGALKHYE EWVNRPRPEWKGQC  
FCR3  
FWDAFMCGYKVHIGNKPCPEHDNMDRIPQYLRWFREWGTYVCSEYKNKFENVIELCNVRCITNQDQSLLLEISKDKCKGALKHYE EWVNRPRPEWKGQC  
Wellcome  
FWDAFMCGYKVHIGNKPCPEHDNMDRIPQYLRWFREWGTYVCSEYKNKFENVIELCNVRCITNQDQSLLLEISKDKCKGALKHYE EWVNRPRPEWKGQC  
T996  
FWDAFMCGYKVHIGNKPCPEHDNMDRIPQYLRWFREWGTYVCSEYKNKFEDVIKLCNIQQFTNQDQSLLLEISKDKCKEALKHYE EWVNRPRPEWKGQC  
T9102  
FWDAFMCGYKVHIGNKPCPEHDNMDRIPQYLRWFREWGTYVCSEYKNKFENVIELCNVRCITNQDQSLLLEISKDKCKGALKHYE EWVNRPRPEWKGQC  
K1  
FWDAFMCGYKVHIGNKPCPEHDNMDRIPQYLRWFREWGTYVCSEYKNKFENVIELCNVRCITNQDQSLLLEISKDKCKGALKHYE EWVNRPRPEWKGQC  
Dd2  
FWDAFMCGYKVHIGNKPCPEHDNMDRIPQYLRWFREWGTYVCSEYKNKFENVIELCNVRCITNQDQSLLLEISKDKCKEALKHYE EWVNRPRPEWKGQC  
D10  
FWDAFMCGYKVHIGNKPCPEHDNMDRIPQYLRWFREWGTYVCSEYKNKFEDVIKLCNIQQFTNQDQSLLLEISKDKCKEALKHYE EWVNRPRPEWKGQC  
FCC2 A  
VWDAMMCGYKVHIGNKPCPEHDNMDRIPQYLRWFREWGTYVCSEYKNKFENVIELCNVRCITNQDQSLLLEISKDKCKGALKHYE EWVNRPRPEWKGQC  
D6 A  
VWDAMMCGYKVHIGNKPCPEHDNMDRIPQYLRWFREWGTYVCSEYKNKFENVIELCNVRCITNQDQSLLLEISKDKCKGALKHYE EWVNRPRPEWKGQC  
Palo Alto A  
VWDAMMCGYKVHIGNKPCPEHDNMDRIPQYLRWFREWGTYVCSEYKNKFENVIELCNVRCITNQDQSLLLEISKDKCKGALKHYE EWVNRPRPEWKGQC  
HB3  
VWDAMMCGYQYEKKDNKCTGYGNIYDIPQYLRWFREWGTYVCSEYKNKFEDVIKLCNIQQFTNQDQSLLLEISKDKCKEALKHYE EWVNRPRPEWKGQC  
7G8  
VWDAMMCGYQYEKKDNKCTGYGNIYDIPQYLRWFREWGTYVCSEYKNKFEDVIKLCNIQQFTNQDQSLLLEISKDKCKEALKHYE EWVNRPRPEWKGQC  
FCC2 B  
VWEAMMCGYQSAQKDNQCTGYGNIYDIPQYLRWFREWGTYVCSEYKNKFEDVIKLCNIQQFTNQDQSLLLEISKDKCKGALKHYE EWVNRPRPEWKGQC  
D6 B  
VWEAMMCGYQSAQKDNQCTGYGNIYDIPQYLRWFREWGTYVCSEYKNKFEDVIKLCNIQQFTNQDQSLLLEISKDKCKGALKHYE EWVNRPRPEWKGQC  
Palo Alto B  
VWEAMMCGYQSAQKDNQCTGYGNIYDIPQYLRWFREWGTYVCSEYKNKFEDVIKLCNIQQFTNQDQSLLLEISKDKCKGALKHYE EWVNRPRPEWKGQC



|                              |                                                                                               |
|------------------------------|-----------------------------------------------------------------------------------------------|
| PlasmoDB 3D7 ref             | -----TKEEDDEEKNETNDT-----TDDTEDIEDIIEENKEKELSNQQQSEKKSISKVDEDSYRILSVSYKDNNEVKNVAESIVKKLFLFNDN |
| <i>Plasmodium reichenowi</i> | DEEELENEGETTKEEDDEEKNETNDT-----IIEENKEKELSNQQQSEKKSISKVDEDSYRILSVSYKDNNEVKNVAESIVKKLFLFNDN    |
| 3D7                          | -----TKEEDDEEKNETNDT-----TDDTEDIEDIIEENKEKELSNQQQSEKKSISKVDEDSYRILSVSYKDNNEVKNVAESIVKKLFLFNDN |
| RO33                         | -----TKEEDDEEKNETNDT-----TDDTEDIEDIIEENKEKELSNQQQSEKKSISKVDEDSYRILSVSYKDNNEVKNVAESIVKKLFLFNDN |
| FCR3                         | -----TKEEDDEEKNETNDT-----TDDTEDIEDIIEENKEKELSNQQQSEKKSISKVDEDSYRILSVSYKDNNEVKNVAESIVKKLFLFNDN |
| Wellcome                     | -----TKEEDDEEKNETNDT-----TDDTEDIEDIIEENKEKELSNQQQSEKKSISKVDEDSYRILSVSYKDNNEVKNVAESIVKKLFLFNDN |
| T996                         | -----TKEEDDEEKNETNDT-----TDDTEDIEDIIEENKEKELSNQQQSEKKSISKVDEDSYRILSVSYKDNNEVKNVAESIVKKLFLFNDN |
| T9102                        | -----TKEEDDEEKNETNDT-----TDDTEDIEDIIEENKEKELSNQQQSEKKSISKVDEDSYRILSVSYKDNNEVKNVAESIVKKLFLFNDN |
| K1                           | -----TKEEDDEEKNETNDT-----TDDTEDIEDIIEENKEKELSNQQQSEKKSISKVDEDSYRILSVSYKDNNEVKNVAESIVKKLFLFNDN |
| Dd2                          | -----TKEEDDEEKNETNDT-----TDDTEDIEDIIEENKEKELSNQQQSEKKSISKVDEDSYRILSVSYKDNNEVKNVAESIVKKLFLFNDN |
| D10                          | -----TKEEDDEEKNETNDT-----TDDTEDIEDIIEENKEKELSNQQQSEKKSISKVDEDSYRILSVSYKDNNEVKNVAESIVKKLFLFNDN |
| FCC2 A                       | -----TKEEDDEEKNETNDT-----TDDTEDIEDIIEENKEKELSNQQQSEKKSISKVDEDSYRILSVSYKDNNEVKNVAESIVKKLFLFNDN |
| D6 A                         | -----TKEEDDEEKNETNDT-----TDDTEDIEDIIEENKEKELSNQQQSEKKSISKVDEDSYRILSVSYKDNNEVKNVAESIVKKLFLFNDN |
| Palo Alto A                  | -----TKEEDDEEKNETNDT-----TDDTEDIEDIIEENKEKELSNQQQSEKKSISKVDEDSYRILSVSYKDNNEVKNVAESIVKKLFLFNDN |
| HB3                          | -----TKEEDDEEKNETNDT-----TDDTEDIEDIIEENKEKELSNQQQSEKKSISKVDEDSYRILSVSYKDNNEVKNVAESIVKKLFLFNDN |
| 7G8                          | -----TKEEDDEEKNETNDT-----TDDTEDIEDIIEENKEKELSNQQQSEKKSISKVDEDSYRILSVSYKDNNEVKNVAESIVKKLFLFNDN |
| FCC2 B                       | -----TKEEDDEEKNETNDT-----TDDTEDIEDIIEENKEKELSNQQQSEKKSISKVDEDSYRILSVSYKDNNEVKNVAESIVKKLFLFNDN |
| D6 B                         | -----TKEEDDEEKNETNDT-----TDDTEDIEDIIEENKEKELSNQQQSEKKSISKVDEDSYRILSVSYKDNNEVKNVAESIVKKLFLFNDN |
| Palo Alto B                  | -----TKEEDDEEKNETNDT-----TDDTEDIEDIIEENKEKELSNQQQSEKKSISKVDEDSYRILSVSYKDNNEVKNVAESIVKKLFLFNDN |

|                              |                      |
|------------------------------|----------------------|
| PlasmoDB 3D7 ref             | NNLETIFKGLTEDMTDLFQK |
| <i>Plasmodium reichenowi</i> | NNLETIFKGLTEDMTDLFQK |
| 3D7                          | NNLETIFKGLTED        |
| RO33                         | NNLETIFKGLTED        |
| FCR3                         | NNLETIFKGLTED        |
| Wellcome                     | NNLETIFKGLTED        |
| T996                         | NNLETIFKGLTED        |
| T9102                        | NNLETIFKGLTED        |
| K1                           | NNLETIFKGLTED        |
| Dd2                          | NNLETIFKGLTED        |
| D10                          | NNLETIFKGLTED        |
| FCC2 A                       | NNLETIFKGLTED        |
| D6 A                         | NNLETIFKGLTED        |
| Palo Alto A                  | NNLETIFKGLTED        |
| HB3                          | NNLETIFKGLTED        |
| 7G8                          | NNLETIFKGLTED        |
| FCC2 B                       | NNLETIFKGLTED        |
| D6 B                         | NNLETIFKGLTED        |
| Palo Alto B                  | NNLETIFKGLTED        |

This alignment represents all sequences observed, all B sequences were removed for MK analysis. The stop codon in RO33 is represented here in red but removed from analysis.
